# Supplementary material for: HD-Marker: a highly multiplexed and flexible approach for targeted genotyping of more than 10,000 genes in a single-tube assay
Source: HighWire-hosted journal article supplement (doi:10.1101/gr.235820.118), 2018-11-08
Supplement: Supplemental_Table_S1.xlsx [file Supplemental_Table_S1.xlsx]

## Sheet: Sheet1
Table S1. Summary of probe information for three column-synthesized multiplex levels (296-plex, 795-plex and 1,293-plex).
SNP ID	SNP	5' locus-specific-seq	3' locus-specific-seq	296-plex	795-plex	1293-plex	Sanger validation
C6837S172	G/A	AACACATTCACTCGCTCCCAAA	TCTGTGGATAATACGTCCTCCA	√	√	√	√
C162S257	C/A	AGTTACAATCCCAGGGGTCCTA	AACCTATGTCCAGTAATAGGAC	√	√	√
C3148S333	T/C	GCAGTAACCAGGGAGTACTCAT	ACATCAGGCGATACGCACGATT	√	√	√
C5215S107	A/G	GCATGTAGTCAGAGCATGTGCT	CCATCTCAAGGTCAAGGTCAAG	√	√	√
C11018S380	G/A	TTGTCTGAACTATCTAACACCG	CTACCGTACGACTTGTCTTTGT	√	√	√
C17024S1107	C/T	ACAACTTCCTCACAAAGATAGA	TTACATCATGTCGCCAGCTAGT	√	√	√	√
C163S206	T/C	TTTCTCCTACTCCCAGCTGTTC	AGGCCTTCTCTGCAGAAATAAT	√	√	√
C435S457	T/C	ACCTGCTGGATTGTCCTTCCCA	AGTGGGACCAAGTTAGACAGTC	√	√	√
C591S171	T/C	AGAGAAGTGACCATTCTGTCTG	TAGTAGGGGCGTGACCTGTTCT	√	√	√
C13188S334	A/C	ACATTGGCAGTTTCGGAATCTG	TGTGTGATCCCATTATTGGTAG	√	√	√	√
C1929S459	T/C	ACAGCGCCCTCTGTGATGACAT	AGATGTCGGAAGCACAAGATGG	√	√	√	√
C13302S358	A/G	ATACAGTAGATGCACCATCAGT	TGATAGATACTGGAGGTAGAGC	√	√	√	√
C3766S642	A/G	CAACTTGGTACCGATCTCCCAC	ATATTGCAGTTCTTTATCACATGA	√	√	√	√
C10312S365	C/T	GCCATGTCTTCCTCATTCTCAT	CAACACCAGATCTAGTCCTCAT	√	√	√	√
C13467S212	T/A	CTACAACATTAGATGTCCACTG	CTTTGTTGTGCTGATAAGCATT	√	√	√	√
C13442S119	G/A	AGCTTGTCTAACCTAGCAGATA	CTAATTGAAACAGAACCCTTAC	√	√	√
C7600S484	C/T	CCATCCAAGGCGGTCAATCTGA	GCCATTTTCTAGATCAAAATGG	√	√	√	√
C13520S236	T/C	GGTTAACTTCTGCTCCTCGCAT	GATAATCCATCAGCTTCTCAGC	√	√	√
C1320S329	T/A	TACCCATTGACACCGTACAATA	AGAGAATAATCTCCTCCATGTA	√	√	√
C11582S1005	A/G	CTAAAGATGTTGGTATGGGACT	CTTCCAAGTTCCTTAGTCGCTC	√	√	√	√
C17986S367	C/T	AACCAGGTCCCAAGAGTCCCAT	TGACGATCCCAGCCACATCCAA	√	√	√
C1881S206	A/G	TGGACAAGAGTGAGGTTTACTC	ACAGCTTGCCCAGTGTTACTGG	√	√	√
C6166S182	C/T	ACTGAATCATGTTGGAATCTGT	TTGTTCGCTGTTCTATAATCCC	√	√	√
C1544S339	C/A	TATCTCACACTGGACAAGAGCC	TCAGAGGTCACCGGTTCAAACT	√	√	√
C4194S399	G/A	GACGTAGACACTTTGCTATAGA	GGTTGATGTAACAGTCTCTTGG	√	√	√	√
C7939S513	G/A	ACGTACACTGGTTACACCTGTA	TCGTGAATGTTTTCATGGTGAA	√	√	√	√
C13713S493	T/A	TCACAGTTTTCATCAGCTTCTT	TATTCAGACTAGTCTCATAATGA	√	√	√	√
C656S270	A/G	AATCACAGCTTAGACATGGTAA	ACAGGGAGAATGCTGAGCACTC	√	√	√
C961S473	G/A	AGGTGAAGTAATAGAAGCCCTC	CACATGTATATACACCCGTTGT	√	√	√	√
C6362S224	C/T	CACGATAGTTGAATGGTTTGCA	TTGTTACGTGATCGTAGTAGAT	√	√	√	√
C2387S132	A/G	ACTCGCCGATTCCTTTTGTCAC	CTAACACAGGTTACACCGAATA	√	√	√	√
C1047S198	T/A	GACAGTTGGAGAAGACTGACCT	CATATTTGTCTATCTACAATATCA	√	√	√	√
C13112S622	T/C	GATCAAGGGAAATAGTTGTAACA	ATTACCACCTGCCATACCTTAG	√	√	√	√
C13134S327	T/A	TGTGGATCTTCTTGTGGTTCCA	CTTATAGTCACCGAATCTTTACT	√	√	√
C11038S101	G/A	TATTCTAATCGTTTCAGTCCATT	AGAATTTCCAGTATTTCCTTTCT	√	√	√	√
C32600S173	C/A	AATGTCGTGTTTTCTGGGACAG	CACTAACTGGGTGATATCCGAA	√	√	√
C24824S117	A/G	CTTGATTGATCATCTTAGTCCT	CGGACAACTGATTGGCCTGAG	√	√	√
C11060S566	A/T	TAGACCGAGCTAATATCACAGT	GGTCGATATCAAATCTCCCAGA	√	√	√	√
C38721S143	A/G	AAGAATGAGGAGCCTTGGTGTA	TTCCTGGTGTTGCAGCTGCCT	√	√	√
C33847S243	T/C	GTAATTGGTACTCGGAGTATCC	CTCGTCTTCGTTGCCACCTCA	√	√	√
C33955S537	A/G	CATACTCTTCGGGTTTGTAGGC	GACCACGATTCCTCAACTTTAT	√	√	√
C29653S83	G/A	TAACGAAACAGATGAAGGAACA	ACGCTAACGATATGAAGGAACA	√	√	√
C32866S330	T/A	GGCACGGGCTAACAGTGTCTT	TTCCTGGAGGACCATACAGAAG	√	√	√
C37887S457	A/G	TGGGGATGGCCTCGGAGTTAA	CCTGGACACCTTTCTCCCAATC	√	√	√
C11121S375	G/A	TGTAAGGACTTTTGGATGAGTT	ATGGCATTGTGTTGGCACTACC	√	√	√
C13165S282	T/G	TTGGTCCATATTCTCCAGGTTA	ACATTATAAACCTCACAAGGTTT	√	√	√	√
C17109S104	T/C	GAATTATTAGAACAAGGTGCAAAT	ATGATAAATTTGTTGCACCACAA	√	√	√
C32686S181	T/A	ATTTCCCTCATGTTTAGCTGTG	CTGGAGTCGGAGTCTGTAGAG	√	√	√
C486S440	C/T	CTCTCCACCGATCAACTGGTC	ACAATTGTAGGGCCTGGATCTT	√	√	√	√
C1457S313	A/G	TTGGAGGATGGCAAAACGATAC	TAGATCACTTTAACAACTATGCC	√	√	√	√
C3352S260	T/C	GGAATAAATGGAAGTCTGCGGG	AGGTGACTAGTGACGTACCCAG	√	√	√
C10914S531	A/G	CTGTGGTCCGTCCTCTTCTTC	GCTGTTTACCGTTGGTTTGGAT	√	√	√
C11157S114	G/C	TTCTGATGTGTTTAAATTCCGTT	ACATATTCCGAAGTGACCTGTT	√	√	√
C21740S885	A/G	TCGGAAAGTACGGAAAGCCTCG	TTAAGATGACGTCACATGACTT	√	√	√
C148S543	T/C	GAAACGTTGCTGAGCAGACCG	AGTCGTGTTTTATCAATAATTGC	√	√	√
C3479S265	T/A	ATGTGTCCTCAGCTGTTCCCC	GCTGTAGGTGTTCTCTTGCCGT	√	√	√	√
C13278S254	A/C	TACGTCAGATGCGTCCAGTTAC	AACTTGCTGGAAACCATCCTCT	√	√	√	√
C13302S515	G/A	CTGCTCATAGACTTAAACAGTT	AGCAGGGAGACTCCACACTAC	√	√	√	√
C7293S162	T/C	CTTGCTACCATTAAGGATGACT	TGTTTTCATAATGGCGAGAGCT	√	√	√
C11303S437	C/T	CTTATGCATAGGTCTTTGTATGA	TAGTTCCACATGAAGTGTTTAG	√	√	√
C17452S1498	C/A	TGCCCGAGTGAGCACTCTTTGA	TAGGCCGGAAAGGCTGTGTTGT	√	√	√
C141S588	C/T	GCGGTCAGGTGACTGGCTGA	TGTCACGAAAGACAGGTCTTCC	√	√	√
C175S350	G/A	AGTAGTGACAGGAAATATCCCG	CACAGATGTTGGCGATGTGTGT	√	√	√
C3737S763	C/T	TGTACCGAAGTGGTATCTATTT	AGAATTGCAGTTCTACCAACTT	√	√	√
C3746S232	C/T	GGAGCAACAAGAGCTACAGGC	TTCTCAGTATTCTAAATGGCCC	√	√	√	√
C3748S69	G/A	TGCAAAAGACAGCAATAGACTA	ATTCGATACTTATATATTTGCAGC	√	√	√
C5657S410	T/C	CTTCATTACGCTCAAGAACCCT	ATATTCTTCTTGGTGACGTTTC	√	√	√	√
C5660S386	G/A	CAAAGTGCTGGTTGGTGCCTG	TGCTACGATTACCTCTCGTGGC	√	√	√	√
C21872S284	G/T	CTATCGCTCTCTTGTGTTTGTC	CCAAATGCTTGCCATACTCAAT	√	√	√
C11351S139	G/A	AAATAGGTTTCCTCCACTGTCA	TTGATTGTCGTGATGGTAGAGA	√	√	√
C45270S783	A/C	TCATTTCTACTTCTAATATCTGG	TACCGTCACAATATTTAACTCTG	√	√	√
C1137S524	T/C	CTCCTCGGGGTCTGTCTTGTT	GTTCTATGAGGTGATTTGTGCG	√	√	√	√
C7440S234	T/G	AGCACAGGCAGTTCTACGACG	GTGTGAGCGTGACGACGCAC	√	√	√	√
C11374S151	T/C	ATCTAATATCATTTTCTACAGTGA	AGTCTCCGTCCAACGTTAGACC	√	√	√
C17585S314	C/A	TCGTTACCTGACCTGGTGCATC	TTCTACAAGGTCATCGCCAAGG	√	√	√
C1253S507	A/G	GCTGTTGTTGTAACCGTCGTAT	GTTCCTCATGCTGTATCAGTGT	√	√	√	√
C5801S149	A/G	GGTGTTCATTCATCTTATCAGC	AACTTGTCACATGCCACTCTGG	√	√	√	√
C25189S401	T/C	CCTGTCAGTGATGCTAGACCC	GCTGACCGGGTGGTCACTGT	√	√	√
C13494S122	G/A	CAGCCTGTCACAGTATAAAGGC	GATATCGTTACATGGCCGATAC	√	√	√	√
C21933S438	A/C	AATGGGACGACACGTGTTTGGG	GACTTAACGGTATCTTGCTCCA	√	√	√
C10357S356	C/T	GTAGAGGGTTGACTGCATCAAG	GAGACATTGTGTTATGAAGTGG	√	√	√	√
C198S338	T/C	GGTCAATTGAGTGCATTGTCAC	TGGTCAGTAAAGACTCATGGGA	√	√	√
C220S228	A/G	CTAGTTTCAGCAGTTTATGTCG	GTTCATCAAGTTCTAGATCAGA	√	√	√	√
C2240S364	C/T	GAAATGAAACTAGCTGTCAATTC	CCCGTGTCAGTGCTGAAGAATT	√	√	√	√
C37503S211	G/A	TGAACAGGTTACCCAGATTGGC	CTGGGATGGACGACAACTGTTC	√	√	√
C3920S131	A/T	ATCTACAGCGATATCGACAGCA	AACATCTGTATGTGTGTATATCA	√	√	√	√
C24907S1090	T/G	CATATTGTTCTTTATCCATCGTT	TCTCGTGAATTGATCTTCTTATA	√	√	√
C10344S218	C/T	CTTTTCATTGTACTGTTTCCAGA	TGTCTGTATCATTAAAAGGCTTG	√	√	√	√
C25022S222	G/C	ATCTGACTGGACCATTCGTCTT	CATGTCATCATCCAAATAATCAT	√	√	√
C3780S393	G/T	TACTAAAGCAGTCTAACAGATC	ACATGTTCACACCTATATTCTG	√	√	√	√
C5901S92	T/C	GTAGTTAATACAACACCACAAAC	AAATAACACCGTAATGTCTACAT	√	√	√	√
C11502S986	G/A	CTTCAATACATCCTGTTGAAAAT	TTGACTATCGCCACAGGTTTCT	√	√	√
C17857S557	G/C	GTGCCATGAGTGGTTTAATTGC	CCCGTACACTTATTGACAAAGC	√	√	√
C371S246	A/G	ACTGAACTTATTATCATGTTGGT	ATCTCTTGTTTGTTGTTGGAAC	√	√	√
C1385S146	A/G	CTGACATGATAACACGATTCAC	CAGTCCAGCCACCTGGACAA	√	√	√
C3917S577	A/G	GAAGGTCCGGTTTACGTAATCC	CAGATTTTGGCGACTTGAGTAA	√	√	√
C5915S124	G/C	CTTTACCGTAACCCTTGTTTCC	CTGAGTAGTCATAGTCAGCAAA	√	√	√
C5925S212	G/A	CTCAGCAGATCCTCCTCTGTG	CTTCTTTCCTGGGTGGTTCATC	√	√	√	√
C24666S197	C/T	TTTTCCCCATGGTACTTCAGTA	GCCCTATGGCGGTCTCCATTAT	√	√	√
C3936S415	T/C	TGCTACTGTCAATACATCCCCG	TCAGATGGCTAAAGAGAGGGTC	√	√	√
C6068S140	T/A	ACGTCTTAACAGCATCGTAGTA	GAATAGTCCTACAGGCAGGGAC	√	√	√
C6071S162	A/G	GAGACTATACCATGTATTGACA	GAGTCCATTATGGTCTATAGGA	√	√	√
C10426S322	T/G	CCAGGCCTCCTGGTGAGTCA	TGTGACCAGTACATCGACAGGT	√	√	√	√
C17942S516	C/A	TGAGGGATCGACCGGCCTAA	GATCATGGTAGTTACACTTGTC	√	√	√
C486S1490	G/A	CTGGCCACGGTTAGCTGCCA	TGAGCTCCTCCCAGCTTTCCT	√	√	√	√
C7747S440	T/C	CGCCTTCTATACTACGCTCTCC	CCATAGTACGCTCCATGGCAC	√	√	√	√
C32311S427	T/C	AGGGAGGCGAGTACCTAAAGGA	GACAATCTAACCGGTATTTCCC	√	√	√
C17981S341	C/T	TGACTTGGTTGAGCAGTTTCTG	CACGGTTTACCTTGTCCGATTC	√	√	√	√
C17983S114	A/G	ATTAATCAGCATCCTGACGATG	AATGCTATAAATTGCTAAAGGATA	√	√	√	√
C17986S114	T/C	ACGTAATTTGGATAGTAAGTAAC	TGGACGTCAGAATCTGAAAGGT	√	√	√
C1829S175	A/G	TGTGTGGCCGACGCTTCTTTGA	GTGGTGGTAATAACCATGCAGT	√	√	√
C13648S908	G/A	TAGGGCAGTATTATTTATGCTAT	GCATCAAAGACAGTCATGTTGA	√	√	√
C1513S145	T/C	ATACTTGAAGTTTCTCCAGCGG	TTGACACGGTGTTGAAGTCTGC	√	√	√
C1537S178	A/G	CAAGCAGTGGCAGCATTTTATG	AATATGCAGCATACAAAATGCAG	√	√	√
C11658S157	A/G	CAATCCAGTGAAGGTTTCTAAC	GAAGAGTGTGTGACAGCCGAGT	√	√	√	√
C13652S138	T/C	TCATCTTTAGCATCACTTTCAAA	CTGAGGCTGTTCTAGCAACCTT	√	√	√
C644S490	A/G	CCAGATATCAATTTACTGCTGA	TCACTTGACTCTGACACGGTAA	√	√	√
C10539S493	C/T	TGTTATGGAAATACTCGCTCCA	AGTTCTGCGCATTCCGGAAACA	√	√	√	√
C10540S815	C/T	GCAAGTCCATTGCCACAGAAGA	ACATCATGTGACTATTGCCTGA	√	√	√	√
C18127S1961	G/A	GTTCCTTCATCCCGGGATGTTC	GTTCGGGCAGAGAAAACCTTCA	√	√	√
C1595S160	A/G	AGGCAGAGTGTGGTTCTCTGC	CTCCTTACGTACAGGATAAATA	√	√	√
C13722S223	C/T	TAGATCGTGACCTTGAACCTGA	CCTAGCACTACCCGCTCCAG	√	√	√
C733S325	A/G	TATCGCCCTTATTATCGCCATG	TCCTATTGTCTCCGTGGTCACT	√	√	√
C2424S82	G/T	CTTAGCCGCCTCGTACCCTC	TGTTGTTAATTTTACCGTTAGGA	√	√	√	√
C6392S488	A/G	ATGGATGATACCATTGCCATGC	GTACCTAAGGTCTCAAACCGTA	√	√	√	√
C13830S516	C/T	CACACCATCGCTCTAGTTTTGG	GTAGCCTGCTGATGACATCACT	√	√	√	√
C2415S246	T/A	CCAAAGAGTACTGGTTGTGTCG	AACAGACGGACAATCCACCATT	√	√	√
C10701S540	A/G	ACAAGGCTGGATCTAACGTGTC	CTATTTGTTGCCATTATCATCTTT	√	√	√	√
C10738S434	A/G	TGGTGATCGGTAGCGGATTCG	ACTCTGGGATGTGTCAGAAAGA	√	√	√	√
C11956S448	G/C	TGTGACCACCTTACCTCGTGTA	TGCTTTCACTGGGCTGACTTTG	√	√	√	√
C18439S528	G/A	TAGCAGCAGAGCCACCCAACTT	TGGCTGACAGGTGCTCACTTC	√	√	√	√
C15211S828	A/G	CCACAACAGAACGTGACAAACA	CAGAGTCTCCCTCACTAGCTAC	√	√	√	√
C49262S1184	G/A	TTGAAGTGGACGTGGATAGCCT	ATTCCCTGGATGAAGGATCTCG	√	√	√
C13899S685	C/T	TGAGCATGTACTTGGCACACTT	TGATGTAACGGTCAGCAGTGTC	√	√	√	√
C13904S131	T/C	CTTACGGTCTTCGTGGTGATTG	GACACTAGAAAGACTGCGTAAA	√	√	√
C18454S221	A/C	ATAAGTTGGTCAGCAGCTTTCA	TATCACTGCCTCTCCTAAAACA	√	√	√	√
C18481S264	A/C	TAGACAGTGTGGCCACCAAGCT	TGTCACTGCTCCGTCACACAGA	√	√	√
C6580S84	G/A	CGACCTACTGCATACGCCGC	AACACTACCAGTCGCTAGAGCC	√	√	√	√
C12073S228	G/A	CCTTCTTTGACTAATTGAACCT	TCATGTATGGCACAATTCAGAT	√	√	√	√
C21175S842	G/C	CAATGTCCACTCTTTATGTCATA	ATAGACATTCTAACATTTCGTCC	√	√	√
C15281S658	C/G	TTGCAGCCATTACAATGACATG	TCTGTTTCAAACCATCCATGAG	√	√	√	√
C2428S282	G/C	GGGTGATTCCTGCTGAGTTTAC	CTGTGGGTACTGCTGAAAATTT	√	√	√	√
C13952S590	A/G	TACTGGTGCCCAGATTGGCTG	GAGTCGTGCGATGCCCACAT	√	√	√
C44269S286	T/C	AATTGGTCAAGTCACTGGACAC	TACTGAAACTGGACGCCGCC	√	√	√
C13981S748	G/T	TGGAGAAACCTATTCTACTGCA	ATCGTGCCCATACAATAACATT	√	√	√
C6658S88	T/C	ATGTCCTTGTTCTTCAATAGTG	CTCATTTGTTCAACTGCGGTTT	√	√	√
C44073S348	A/T	TCATTACTTCCTATCACATCTTT	ATAACACACGGCGGTTGAAACG	√	√	√
C10896S356	C/T	TGTGTTTACGTTTGCTACGATC	TTCTGCTACGTCTATCTCTTTC	√	√	√	√
C18627S309	G/A	TGCTGCTTCAGAAGATGTTAGG	CTACGGAAGGGCCCATGTTGAT	√	√	√
C9268S300	A/G	AACGACACCACTATATGGTAGC	TCAGGTGGTCAACTAAAGTAGA	√	√	√	√
C37140S385	G/A	CTTGGGTGGAGACCATATCACC	CCTATTCACCTGACTGGCATCT	√	√	√
C39014S289	T/C	CTCGGTGTGTAGGTTTGTCAAC	AAGTACATCTTGGCTCGTAACC	√	√	√
C13040S855	A/G	TGTAGAGCTCTTTCATGCCTTC	CAAATACGGTCTGGTCAATCGG	√	√	√	√
C13040S1736	C/T	AACATCGGCGATGTGTTTTGAG	GCCAAAGTGGTTTGTTCAATGA	√	√	√
C31809S218	T/A	TTCTAGGTAGGAGGCTGCCTC	AGATGTCAGGGTGGTGCCCTA	√	√	√
C14060S1122	A/G	GATCTGTATATGTACGGCAGTT	CGGCGCATTGTCTAGATGGAAA	√	√	√
C2374S673	G/A	AATTGTAGAGGCTGCTGGAGTC	CTGGTTTGTCTAATCGGACTAT	√	√	√
C6755S541	C/T	TTCCCTGTCCGCTGTGGTCC	CTTCTGGAATCTTGTCCTCAGC	√	√	√
C9306S495	C/T	AGGAAGGTGCTCTTCACGTTCA	TGTATGATCGGATTCTTACTCG	√	√	√	√
C14105S207	C/T	TAAAGAAGAACAAGACAGCGCT	ATGTCCTCAAATACCACGTGGT	√	√	√	√
C15506S373	A/C	GCAAACTCTAGCCACAATATTTT	TGGAAGATGGCCATTTTGTATT	√	√	√
C6826S55	C/A	CAGTAGTGTGCGTACTTCCAAA	TGCAGATAGATATGCCAGCAAT	√	√	√	√
C9396S218	G/A	GTGTCCATTAATGATTAACTTCT	AGCTCTCACACTCTCTTGATAA	√	√	√	√
C44064S331	T/A	TGTTCCTGGTACAACGGTCGC	CAGTGCCGCCATTACTAGTTCC	√	√	√
C15628S1063	C/A	GTCGCTTACTCTGCTCCTTTTC	TAAAATCTACCTGCATGACCAT	√	√	√
C2638S291	C/T	AACCAGCAACACGACCTTCCAT	GACTGCTATTGTAGGCAAACAT	√	√	√	√
C24044S177	T/C	CCACTTTACAGACAGGACACTT	AGGTCTTCTCCTCTTTACATTG	√	√	√
C14186S237	G/A	TACCCATCAGTTCCCGAAACTC	CAGTCATATCTAGAGGCAGTCC	√	√	√	√
C48116S285	A/G	TGTTGTCCAGGCGTTGATAGAG	CTATTGGGTCGTATCTCGGCCA	√	√	√
C12376S206	G/A	TGGACTTTACAGACTTCTGATC	TGCTCCAGATCCTGACCCTGA	√	√	√
C22002S509	A/G	AAAGGGGATGTGGCATATGATT	TGTCCATGTGTGCACATTGTTT	√	√	√	√
C18733S307	G/A	TGTCCATGTGTGCACATTGTTT	GAGATGTAGATGATGGGATGAC	√	√	√
C40379S150	G/A	GCAACGAATTGTCGAACCAAAC	GTTTGTATTCCGGAATGCGGGA	√	√	√
C30248S753	G/A	GTAGTGGCTCTGGAAGTATCTT	ACGATGTCCAGTGTGTCGGGA	√	√	√
C22144S315	T/C	TGATTCGTGGGTCACTACGACT	ACATCCCATATATGGACTGTAA	√	√	√	√
C18912S482	G/A	CATGTTCTACCCAGGGATTATC	CATCCCAGTTCCTTAACCCAAT	√	√	√	√
C30287S1286	C/T	CTTCTTAACAGCAATGTTTTCC	GTGTTGTATAGTTGACTGTAGA	√	√	√
C41011S289	C/T	GATCCGACTCCATCTTGATATA	TCATTACAGACTCAAGCTCCGA	√	√	√
C30321S1078	T/C	CATCCCAGGCATTTGTGCGG	CTCCTTGTACCATCATGTGTTG	√	√	√	√
C22249S473	G/T	GAACAACAAAGAATACCCTGAT	TAACTTACCTGATCTGAACGAA	√	√	√
C25947S104	T/C	CATTCTCCATATCCTACTCTTAA	CAGAAAATGTCGGTGGAACTAT	√	√	√	√
C30359S503	T/G	TATGTCCTCCGGCTGCCCAAT	GCGGCTGTTTGTTTTGTTCACG	√	√	√
C21312S1106	T/C	ATGTACTTTTGATCTTCCTTACA	TATTCTTGACGCCCGTTAGCGA	√	√	√
C22365S528	C/A	AGAGCGTTTTCTGGCAAATCTA	GTTGGATCCATGAAATCCTTTC	√	√	√
C22419S528	A/G	GATGATTACCACCAAGTGTAAG	GTATTGTAAAACCATAGTTGTGC	√	√	√
C34952S240	T/A	ATACCTACATTCGGGCAGGGAC	CCAGGAAACCAGACTTACCATA	√	√	√
C41331S979	T/C	GCGAATGTAGGGTATAGGCATT	ATTTTGTCATCGGAAGGCCAAG	√	√	√
C41454S450	C/T	TGTAAATCCGTCAGCAAATGCC	GTCTATAGCAATGAAACAGTGG	√	√	√
C19356S135	T/C	CGCCATGGTCATCCAAGGACTT	CTTCAGCTCTTATTCTGGCTTT	√	√	√	√
C26131S237	T/C	GCAGTAAGTTCTCGACCTATCA	TTCATGACTCTTCCCCATACTC	√	√	√
C26222S747	A/G	CAAAGATCTCCGGAGCTATACT	CTAGTTTATCGTAGAAGTCATC	√	√	√
C19563S124	T/A	AAGAATCCGGAGAAACAAACAC	TGGGTAGTAATGTCACATTTGG	√	√	√	√
C22556S478	A/G	ACTATGCCACTCATGAGATTGT	CTGTCAAGCAGCCGTGGAGC	√	√	√	√
C41766S1425	T/C	GGTATTGATTTTGGTCGGTGAA	CACAAAGATGAGGAAACGGCAA	√	√	√	√
C42037S725	A/G	TACAGCCATCATCATCACAAGC	ACGAAATGAAGGATTTCTGGCA	√	√	√
C19569S261	T/C	ATAGCTCCCTGAATGCCAGTAC	CAACCACCAGTAAAACACCCAT	√	√	√
C36302S262	T/C	TTATTAAGTACTGCGATCACCA	ATTTCCTCTGATTTAGCCATTTA	√	√	√	√
C19634S751	A/G	GCAAATTCTGGACTATTTGACA	ATTCTCTCAACCAGTTTGTTCA	√	√	√
C22571S304	A/T	TATAGTGGCGTGTCTTCAGACG	GTTTGGTGCTCTTGTGAAGTCC	√	√	√	√
C42372S207	A/G	TTTTCAGAAGATAAACATTGGGT	TACTCAAAGTCATGCACGAACC	√	√	√	√
C19761S225	G/A	CTCCCCTTTTAGGTTCCTTATC	TCAGAGATCCATAGGCGATATT	√	√	√	√
C42648S332	A/T	CAGGCTCAGGCCGGTCTGTT	CGTAAGCTAGAGTCTGGTTCAG	√	√	√	√
C19848S175	G/A	CTTTGTTGAAACGACGATCCTG	CCTTAAGGATTCTCGAAAACAG	√	√	√
C19848S286	G/A	AGGGTTTGTCTTCCTTCTTACT	GTATTAGAGTTGGCAGAAGGGT	√	√	√
C36550S1254	G/C	TGCTCCTGATGAGGGGCTGTTT	CACTCTCCCCATTGGTCGCTAT	√	√	√
C23547S330	A/G	TGCCAAAGTCAGCTGTGCTTAA	GGATGCCATGGTTCTCACAGTA	√	√	√	√
C26612S646	T/C	TCATTGCTGTCGGCTTCTTCAT	CCATCGGGTTCTTTGGATGTTG	√	√	√
C26740S331	T/A	GAACGAAGTACCAGTTAGCCAC	CGTTGGTGATCCACATCTTGTT	√	√	√	√
C30882S360	C/A	TCCTGAACTTAAAACTATCGCT	TAGACATCGCCGCGGCACAC	√	√	√	√
C30936S169	C/T	CAACTAAACCCAAGGAACCACC	ACTCAAACTGTTTAGGAGAGCA	√	√	√
C35645S180	G/A	CTCCCAATCTTCCTTTACTTGC	GCATCACGATGCTTCAGGGGA	√	√	√	√
C42929S964	T/G	CTTCCAACGTGCATTATATGAT	ACCTTGACCTCCAATGCTTCAG	√	√	√
C26740S751	T/C	CAATCTCCCATGCTGAACGGTA	AAGTCTGGCGGTCTCCACAC	√	√	√
C26767S191	C/T	CATAGGACTGGACGTATGCTAG	GTAGGAAGCCTTTGTCGTCTGC	√	√	√
C26800S309	T/C	AATGTCCGGTTGGCAACATGTC	AGTATAAATTCCAAGGTAGCAAC	√	√	√	√
C30946S486	T/C	GAAGAGGTGCGGCTCATCAG	AGTAACCACTGGACATCTGGTC	√	√	√
C22907S250	T/A	CTAGGATTTCTGAACTTAGCTC	TATGACTTTCCACCGTCTCATC	√	√	√	√
C23905S363	G/A	TGGGGTCGTCATCTCTCGTCAT	CAACAGCGTTACCACTGTAGCT	√	√	√
C45788S313	A/T	CGTATCCTACATAGATATAGTCT	CTCCGTTGTCTTTATTTCAAGT	√	√	√	√
C31603S213	T/C	TACTGTGGAGGATAGCTCTAAC	CTGTATGGCGGGTCTCACAAAC	√	√	√	√
C22916S375	G/A	GTTAATGGCTATTGCTTCCGAC	AAATGCATTTACCGTCCCTGAC	√	√	√
C35724S312	G/A	TCCTGATTGGTCAAAATTTGCA	CAGGAGGGCCTGAAGGACTC	√	√	√	√
C27247S161	C/A	AGAGGGCCATATCTAAAGCGGA	ATGACTTCAGTGAAGTGGTCAA	√	√	√	√
C20212S346	C/A	ATGGGATCGAGCAATCTGATTA	TCGCTTTCCGCCTTCAGTTGG	√	√	√	√
C27228S570	A/G	AGACACTTCCGTCTAGACCACT	CGTCACCTCCAATACCAGCCT	√	√	√
C43228S357	A/G	ACAATAGGTAGTGGTGAGGTGG	GTATTGGCACACCACCTGGG	√	√	√	√
C29921S502	G/T	ATACACACTCAATGAGCAAGCC	TTGTACATCATGATGTTGTGTTC	√	√	√	√
C35935S733	C/T	ATCAGCTGGTGGAATACTGACC	TATCTACGGTTTGAGATGAAAG	√	√	√	√
C35958S657	A/G	TAGTGGCTACAGATGTGGCCTC	GTCTCGATTTCCCGGACATTCA	√	√	√	√
C43406S194	C/T	AGGCTCCGTCATTCAGACCC	GAGAATGTGTGATTGATGCTGG	√	√	√
C43423S551	G/T	TCTTCTCATCGTTTGCATCTGT	TGATAAATGCCTCGTGGGCTTT	√	√	√	√
C23805S439	T/C	TCCTGTCTCTGTCTCTATCACG	CGCGATCTCTTCGTCTGTCATA	√	√	√
C31272S265	T/C	TGACCGATACAAGGAACTCGAC	GATCAGACTCGGATGAATCAGC	√	√	√	√
C31538S475	T/G	ACCATCATCACCATCATTCGCG	CCTAAGTCCAAGACTTATATTGA	√	√	√
C23302S420	A/G	TCATGGCCACTTTACGGCTGTA	TGAACACAAACACCATGTCAAA	√	√	√	√
C31502S237	G/A	AGGGACTTGTCATCGAAATATT	TGGATATTTGCGCCTTTCACAA	√	√	√	√
C23517S1064	A/G	ACATTGCATCCGGAAATGCCAT	GCGGAAACGTATTTGAAGCTCG	√	√	√	√
C31293S380	A/G	TTAAAGTCAGCATCTGGTTGTT	GTGTTATTCCGAGTTAAATACAT	√	√	√	√
C31293S549	A/G	TTTGTCTTGTAGGAATACAGCG	TAGAAGAAGAGTTGACAAGGCG	√	√	√
C31500S425	T/C	AGTTCGTACTATCTTCGGACAT	TCTTCAGGTAGCGGTCATGGTC	√	√	√	√
C43542S487	A/G	GAATACGGCTCGTCATCATGAC	GGAACCAGTCTGGTATACTGTA	√	√	√	√
C20740S340	A/T	TTAACTATGACCTACCTCAGTC	ACGAGTATGTACACAGGATAGG	√	√	√
C133S962	A/T	CTCGCGTTGTAGCACACATTGT	TCAACATATGGCAGTAATCCGC	√	√	√
C5215S347	T/A	CCCTGCGGTACTGCTTGGTG	GCTGTGGTGTCTTGCGATTGGT	√	√	√
C353S253	G/A	TGACTGCTGTGGAGTAGACAGT	GGAGTTTATTAACGCCACCAAG	√	√	√
C11098S282	T/C	CTATGTCTAAACTTAAGGAATGT	GATCGTATTCGTCCCATCCTCC	√	√	√
C1493S142	T/C	GTCGACATCATTTCAGTAGATG	ATAGTGTCAGTTGTAGTAGAGT	√	√	√
C11128S233	T/A	TCGGTAGTGTAAGACTCCTTTA	AGTCCCGCCAATTGTCGGTGAA	√	√	√	√
C17267S653	G/A	TGGGAGTCCCAGACAGTTGG	GGAAACACCTCTGTCTGATCAG	√	√	√
C890S317	G/A	ATCTCTGTGAATCCCATGCTTC	AATTTCACAGACGTTTCGTTGG	√	√	√
C10991S357	A/G	TTTGGCTATTTCCGGTGTACAT	TAGCAACGCTGAACGATTGAAG	√	√	√
C38S585	T/C	CACCTCACTGACATCTAACAGT	TTAAAAGCGACATATTGCCTCT	√	√	√	√
C17530S185	T/C	GGACAAGGTAGCGGTAGTTCTC	AGATCGGACTGTCTGTGTTCAT	√	√	√
C7680S384	T/A	ATGTTATCGGTGTAGGTGACGG	ACACAGCCCAGGTGAAGACACT	√	√	√	√
C1758S612	C/T	TGCTGCGATACGGTTTTACACC	GATGTACAAGGTGAAGGGGCAC	√	√	√
C10441S807	T/C	TTGGGTGATCGCCTTTGGTTTT	GGTAACAGTTGTTGTGGATGGT	√	√	√
C13580S48	T/A	AACTATGATGCCTCCACCTGTC	CTCGATACACAGCCTGGGCC	√	√	√
C10530S376	G/A	AACGGAAGTCGTTTACAGCTTT	ACTCCCTTACATCTTGATTCTG	√	√	√	√
C10550S186	C/A	AGTTCGTTTAAGAGATCATTGTA	CCTTCTGATTGCTAAGCTGTTT	√	√	√	√
C11743S295	C/G	TCACTCTGTCCAAAGAGTCAAG	GACCTTGACCTTCAGCGTTGAC	√	√	√
C15051S1386	C/G	TTATCACACAATTACTGTGTAAC	CGACAGTGATTTCCTGGCACCA	√	√	√
C15084S415	A/T	AAGTAGGACACCTATTCGACGA	CTAGAATGTTTCTGACTTTGTTT	√	√	√	√
C6364S1473	C/T	GCTCGACATGCACAAGTGTGC	TTTTGGTGCGACTCTTCTTACT	√	√	√	√
C13767S693	T/A	TTTCACAATATCACATTCGTTAC	CTGCAACCAGTTGTCTTGAATT	√	√	√
C18169S070	A/T	GCCTCCTGATGTCGTTCCCG	GGAATCCGTTACTGAACACAAC	√	√	√
C6408S259	G/A	TACAGGTCATCAGACTCCTGAA	TCCTCACAAGAGTTTCAGTCAA	√	√	√	√
C10624S289	G/C	GTTCTAGCCTCTCTTTCACATA	GTCACGTGGCTAGTTCCCACA	√	√	√	√
C15117S745	A/G	AAGTATTATGTGATGACCTCTG	ACCTTGCTGACAAAGTTTCAGA	√	√	√	√
C15142S209	A/G	TCTTTGGGTTATCTGCGAATCC	ACTGGCTATACCCAGAGTTGTA	√	√	√	√
C13843S1094	G/A	GCCGACCCACTCATCGCCAA	CGTAAGGCACTCGTTTGTCTGC	√	√	√
C6465S451	C/T	CAGTTTACGTGACGTAACAGAT	AATAACTACACCAATCCATGCC	√	√	√
C13864S614	C/A	TTCTGGTATGTAATTGTTGCTG	TGTCTTCAATTCCACGTTCCAC	√	√	√
C10785S289	A/G	CCACTGCCAGGTATTAACTGCC	CTTGTAAGATTTCACCTCTGAT	√	√	√	√
C15256S166	A/G	TTCCGTTTGGAAAATCGCTGGT	ATTCCATGAGAGGACGTCTTAA	√	√	√
C15270S1270	A/G	GGGCCATCGGAAAGTTCTTGTC	AGCAGGGCTCGCGAGTCCTT	√	√	√
C15277S218	C/A	TAGCAGTCATTGCTGGGTAAAC	GATTACAACTGGATGACGTCAT	√	√	√
C13969S310	G/A	GATACTGCAACTTGGTGAGAGA	CATTGTCAGGGATAGTATGAAT	√	√	√	√
C2312S296	A/T	CATGTCATCCTACTTAAACTTCT	ATAATGTCTTGGAGTGTGGTGC	√	√	√	√
C6714S128	G/T	GTCGGAGTCTGCCGCAGTTC	GTTCTGCCATATGGTCAGATTA	√	√	√
C6806S191	G/C	CCAAAGTTCCTTCATCTCTCAG	TGGTTATTCTGTCATACCATTC	√	√	√
C15363S43	A/C	CTGATATCAACATTATCAGCACT	TGAAGGACATTCGCACCATCCT	√	√	√
C15376S1350	A/C	TGAAGGACATTCGCACCATCCT	TGATGATACGTTCAAACTTCTTT	√	√	√
C9311S161	A/T	ACGAGTACATCCTGACTTGACT	ACAAAAGACTGGTTGTTCCACT	√	√	√
C12341S258	T/C	GTACAAAGAACAAGTGCACGGG	TCAAAGTAGTCACGTGGGTTGG	√	√	√	√
C15550S267	A/G	GTGGTCCGCCTCCTGGAATT	ATCTGGGAAACGACAGGTCAAA	√	√	√
C15529S654	A/G	CCCCAATGGGTCATTTGGATCA	GGATATTGGATTAGTCAATTTAG	√	√	√	√
C14181S1154	A/C	TGTGTGCTCTCTTGACATTACG	CCGACATTCCGGGTCATCATCA	√	√	√	√
C2575S367	T/C	AGTAGTTCTTCAGATATGGCTC	ATTCCGTCCACAAACTCCTTCT	√	√	√	√
C6849S1020	T/A	CGGACGGAACGCCATGTGAC	ACTGAAAACACTTGGGACAAAG	√	√	√
C14171S289	T/A	AGTAATGATAAACAATGCCTATC	AGTCTCGACACAAATCCTCGCT	√	√	√	√
C40002S153	T/A	TGCTGTACGCTGGGATGTTCC	GCCTGTCGTCTGTCTCAGTAAA	√	√	√
C1S380	G/A	CTTATTAAAACACTTCAGAAAAGC	CTTTCTTTCAAGAATCATGTATTT	√	√	√
C28S120	G/A	GATTCTGGTACAGGAAGGCCGA	ACTAACCCGGCCCTCATCAGT	√	√	√
C39S207	T/C	TGTCTGTCGACTCATTACTGTC	TCTCCATTCTTGCAGCCTGTAT	√	√	√
C88S228	G/A	TCCTGATTATTTGAAGTTGGAAT	CTGTTTGATTTGTGTTCTTGTC	√	√	√
C144S314	G/C	CTCACCCTGCTTACAGATCATC	ACTCTTTATAGTGACCATGAGA	√	√	√
C153S84	A/G	GGATCTGACAGTTATCTAGGAT	ACATGACGGAGCGAAGATGTAC		√	√
C183S236	G/A	CTGGAGACATGTGCATTGGCGA	GTTTGCGTTTTCGGCCTCGAC		√	√
C204S559	T/C	CTCACCTGTCTTTACCGGGAG	TGTTGACCCCACCAAGGGCG		√	√	√
C336S537	T/A	GGTCACCAGCGTTTGGTGTGTA	CAGCACAATGGTTAATGGAACA		√	√
C363S235	T/C	TATAAACTGAACTTCGTATATCC	ATATTAATATTGCTTCACTAGTGA		√	√
C393S402	G/C	TGTTGTCTTCGTCAAGCGTATC	AACTTAACAACAGGAAGTTGTC		√	√
C425S148	G/A	GTGACAACACATTAGTTACCAG	GTGAACAATATTCAACATATTTCC		√	√
C472S146	T/C	TATTAAGGTGACCGAGGAAGAA	ATTCCAGTCACTTGCCAAACTA		√	√
C497S432	C/T	CCTCTGTGGTTTTGTCTGGTTC	CCACGACGTCCAGCTCATCAT		√	√
C520S528	G/A	CATCTTGTCCTATTAACTGTTG	TAAGCAAGTCCCTGGCATTTCC		√	√
C521S322S323	A/G	ATCATATACGATAATGTCAACCA	GTCTATTTCCGTGAAATTCGGC		√	√
C533S217	T/A	TGTTTCTTGCTCCTTAGTAATAT	CAGGTGATGAAGTAGGATTTGA		√	√
C560S145	A/G	TTCAAATCAACGGCGACTTTCG	TCGATGCATGCGCTGTAGCCTT		√	√
C563S286	G/A	ACAGTCCTAAAATATCAGAAACA	CTTCACTGAGTCAAGTTCTGTT		√	√
C589S497	C/T	GTGTTGAGAATAAATACAAGTTG	CGTAGGTACCAGCTTCTTCAAG		√	√
C598S205	G/T	GATGTATTTCTCCTCATATTGGT	AGGAATAAATTCACCGACCATT		√	√
C602S362	G/T	TAAAATAAAGGGTTCTATGTACAT	ATGAGCATACTTTGGAGAAAGT		√	√
C620S188	G/A	TGATTTCGTTGACTACAACATC	CTCTGGTTCCTGCACCTTCG		√	√
C622S773	G/T	ACAGAGCTGGTACATCACATGC	TTCTCAGTAGTCTCGTCATTGT		√	√
C681S77	G/A	ACTTTGAACTCATGTAGACCGA	GAATCATGTCAAGTCGATTCC		√	√
C712S134	T/A	ATCACAAATGTTACCAATAAAGC	GTACAGTTACATTCTAAACACAA		√	√	√
C735S650	A/G	CCTCCATGAACACTAAGACAAC	CCGGAGTCTTCGTCACAATACT		√	√
C751S475	T/C	GTCTCCATTAAATGTCTCATAAC	TAATGAGTGTTCTCACCAATGT		√	√
C785S251	A/G	ACTACACTGTGTCTGATCCCTT	TTGCGGGCGATGGTTACATAGG		√	√
C817S328	C/T	CATGTGAAACTTGGACATGATT	CAAAGTAATTGTGACATCATGTG		√	√
C825S586	T/G	TTCAATATGATGTAATGAGTTATC	AGTTGTTGCTCTGTCGCTGGC		√	√
C844S56	G/T	GGTGATTCTTTGAAGTATGAGT	ATGGCCTCCTCTGCCGTTATAC		√	√
C879S211	A/T	TTTATACAAGTCTGGAAGGTGG	ACAGGTGGATTTCCTTATAGTG		√	√
C903S258	A/G	CACACACAGAACAGTAATACAC	GTATACAGCAACAATACATGTAA		√	√
C921S506	C/T	CTCCGTTTTCTGACTCGGTGTT	CAGCTTCGGACTCCGTCATAAC		√	√
C954S316	T/C	ACATGTTTCCCCTCCGTATACT	ACAGTTACACGAAGGCTTCCC		√	√
C965S150	G/C	AGGAACGAGTCAGCCATCCCA	AACGGTAATTGAGTACGGCCCT		√	√
C981S97	C/T	CATTATTCGATAGCTAAGTCAC	CTGTCACATGAATTCCGTCAGA		√	√
C1057S591	T/G	TTACGGGTAGTTGTTCAAAATTA	ATGCCGACTTAGTTGGACAGCA		√	√
C1061S176	C/T	CATTCTCTTTCTTTTCCTGCTC	CTTTATCAACTTCTTTCTTTCCC		√	√
C1111S651	A/G	CTTCGTCCTTTTCCTCGTCCAT	GCGTAGGATTGAAGCCATACTT		√	√
C1113S415	G/A	AATGAGTATGGTAAGGAACTGT	ATCACAGCGCACCGGCACAA		√	√
C1121S670	T/A	CCTTCAGTAAATGTAGTAGATCT	GGTTGTCTGCCCCTAGTCTATT		√	√
C1149S268	C/T	CGTTCCACATGTTGTCGGATGT	CACTTATAGTTGGATTTGCTGC		√	√
C1201S192	A/G	CATCCTGGAGACTTGAGCCTTT	GGTCAGTATACTTGACCGCTAG		√	√
C1250S426	G/T	GGTGTTCATCCAAATCTCCATC	CCAGGTAAAGGTCATGCTCGTC		√	√
C1295S395	A/C	CCTAGTGACACTGAATCATGAT	GACCAAACATGACCGACTACTT		√	√
C1311S949	C/T	CCAGAAGAGCAACGTCTGTCG	CCATTGTCAACTTTTCCATTTAA		√	√
C1348S309	A/G	CAGGTAGTGCATTCACATGGTC	TGTGAAATAGCGTCACATCGAG		√	√	√
C1357S373	A/G	CGATCATTTCCATTCCAACATT	TGTCACGTGATCCAGAACAGCT		√	√	√
C1368S47	T/C	GACATCTCTCCATCAATGCTAT	CTGTCCACTTCTTGGCTCCCA		√	√
C1375S179	C/A	CACAGCTTTCACCACTTCGTC	ATCGACAATGCCTCAGAGCCTC		√	√
C1379S1002	C/A	ACGCATTCCTAATTATAGTGAC	CGGCATGAGTCAGATGGCGAAA		√	√
C1387S311	T/C	AAGACTGTTTTACAACATCCGC	CATGCCGCTTCAGTTTATCCAT		√	√
C1392S618	T/A	TTCCTCCTCGTGGAAGGTACG	GAAAGAGACAGGACATGGTCAC		√	√
C1420S295	C/T	AGGAAGTGATGAATAGAAGTAG	ACAGAAAAGATCGATCTAGATC		√	√
C1425S228	A/G	TGGCTCTTATTGCATATCTTGA	TCCCTAGTGCTTTACTTGACAT		√	√
C1453S140	G/A	TGGTAAATTAACAGTATTTCATCA	TGACTCTACCATCTGCTGGAAC		√	√
C1481S799	G/T	GATGATCTTGACCTGGAAGTGG	TTTGAGTAATTAGGTGAATGAGC		√	√
C1504S333	A/C	ACAGACACACCAAATAGATTATA	CCATCAGCTTGCGAACAGATGG		√	√
C1521S457	T/C	TCCAATACCTAACGGTCCTGTA	ACTGAAGACTGGGTCTGTCAGT		√	√	√
C1536S195	C/A	CAGCAACCTTCTGGTCAGCCA	ACATACATGTATAACATTTACCC		√	√
C1611S154	C/T	CTGGAAGAGATATGTATGAAATA	ATGATGCATTTACCTGGGACTG		√	√	√
C1619S210	C/A	CTTAGGTTTCACAATATTCATAAC	CATAGCCTTCATAACAGGTAGA		√	√
C1626S229	A/G	TACCGGTGTAGTATTCTGGTCA	AGTTTGTTGGCTGCTGCATTTG		√	√
C1630S115	G/A	CAAGTTGAATCTGATAGTTCTC	TTACCATATTCTGTCACATTGTC		√	√
C1678S167	T/G	TTTCACACAAGCTGCATTGACA	CTGAACAATTCCTCCCTGAACT		√	√	√
C1714S421	T/C	AATAAGTCTCCTGCCATGATTG	GCTAACAACGATATCCAGGAGC		√	√	√
C1778S351	C/T	CACCCACACACTTGCTGTTGAC	CACTGGGCAGGAGATGGAAGT		√	√
C1829S271	G/A	TGGACAATGGGAAGAAGATTCC	CTGGCTGGAAGTGTGAGAAGTG		√	√
C1840S175	A/G	AGTATAGACATATGAAGGATCTA	GTTTTCCAAGAAAACTGAACATT		√	√	√
C1894S91	A/G	ATCATAGCTGTGGCGTTCATTT	AGATTTGAAGGAGGTGGCGGC		√	√
C1901S421	A/G	GTGAGGTTGTGTCAGACCCACT	ACTCCGTATTTCTCTGCCAGGG		√	√
C1912S121	A/C	AACCGATCCTTTAAAGGCTTTG	TCTTGAAGTACTTTGCCGATTG		√	√
C2014S374	A/C	ATTAATGCAATTATTGTCACCGT	AAATAAAGGGAGATTACTATCGC		√	√
C2041S647	T/C	GGTCTACAGCTATAAGCTGGTC	GATGTTGTCTCCTGACTAGACT		√	√
C2200S343	A/G	CCTTTATCCTTCCCTGATGTCT	GTGTCTTGTTTCTTCACCTCTG		√	√
C2201S113	G/T	CAAAGCTAAATGTGGGTCGTTA	CCTCCTTACGAGGAAGGGAAGT		√	√
C2224S511	T/C	GCAACATATTCCAAACGGTTTG	TGGCAGATAGGAAAGTCTTAGT		√	√
C2230S476	T/A	CATAATCACACAAGTGCTTCTG	GATCACACCCCATATCTGTCTG		√	√
C2289S434	A/T	AAATTGTATGTTTTGACTTTCTTG	ATCAAATAGCTCAGCTAAGCCT		√	√
C2306S205	G/A	TACGTTGTTCACTGATGTACAG	CTTGTAATACAGATTGTAGAAGA		√	√
C23396S354	A/G	TGCTGAGGGCAAAACAATCACG	TGCCACTCCCGAGGTCCAAAAT		√	√
C2365S234	A/T	TTGGAAAATCTGTTTCTTTCTTTA	GAATCTGACGTTTGACTAGTCA		√	√
C2378S249	A/C	ACCGTTATGATGTGGGTATTTC	TACAATATGCGGGGAGGACATG		√	√
C2419S249	T/C	GACATGTTGACATCACAAAATGA	CATTGCTACAAAGACAATGTCT		√	√
C2478S456	T/C	AGTGTTCTACTTGTACAAGAGC	ATGTTCTCATTCGTAGTCGTTC		√	√
C2537S210	T/C	GGTCCCAAGTATGACAGAATTT	CATGATCAACAAGACTACACAG		√	√
C2539S184	G/C	ATAGCGTTTGTGTTGCCGCCAT	AAATTAAATGGTGATTTAGTTCCT		√	√
C2540S207	C/T	TACTAACAGCCTCTACAGTCGG	CTGTCAGATTCTGCGTGGCTAT		√	√
C2570S322	C/A	ACTTCTGTATGAGGAATGCTCA	GAGTTGTAAGATAAACAGCGTA		√	√
C2571S168	G/A	AGCGTGTCCTACACATGGCCAT	CGGTCATGCACATCAATATCAC		√	√
C2578S297	C/A	TCTGTTCTGCAAGCTGCATGGC	TGGATTCATCTGTGTCTTTCTG		√	√
C2601S493	T/C	CGTGTAGTTCTGACAGCCGATT	GAAATCCTGATCGTATCTGGAG		√	√
C2612S92	T/C	TAAACATGGACAGTTTTAAGATC	AAATATTCACTGTGACAGACCA		√	√
C2629S242	A/C	AAAACATCCCATTTCCTGCAA	CTTTGGGGCAACGCATGCTCT		√	√
C2639S240	T/C	CTAGTGTATCTCAGGTCATTAT	TTTTCCTTTCGTACATTCGGCA		√	√
C3119S432	A/G	GCTGTTGACCGGGTAAGTACC	CTTTGACAGATATCGGTGGTAT		√	√
C3137S575	G/A	TTGGCTAGTTGTTCTATGTTGT	GGGCTTGGGTCATTGGACAAAT		√	√
C3177S1038	T/C	TTATATTGATCCTAGCGTCGGT	ACATAGTAGGATTAGCAAGTCC		√	√	√
C3190S318	G/T	TGAATTCGCGCAGGAGGCAAAG	GGGTGTTCAGTACGTAGGGCTT		√	√	√
C3206S339	G/T	GCCCGGATGTAGTTATGGTCTG	CTGTAGTAGTACACATGACCGT		√	√
C3299S743	T/C	TCTTGGGAAAATCTGCGATCAC	TACCGTCTTGGTTTTCAAATTC		√	√
C3324S82	T/C	GACGGTAGCTGTCGATGGATC	CTGTACTTGTTATGTCAAATGTT		√	√
C3345S268	A/T	GGGCTGAAAACGAATACCTGG	CCCTTCAATAGACACGGACAAA		√	√
C3421S455	C/A	ACTTTACCGATATCATTCCATTA	ATACATCGACATGTTTGACCAG		√	√
C3506S55	C/A	ATGTTTGCCGCCGTGTTAGT	CAAGTTTGAACTCATCCCATCG		√	√
C3651S653	A/G	GACAGCAACAAATGTTCAAATC	TTAATGTAAACCTAATCCTTGCT		√	√
C3702S482	A/G	GCATCTTACTCGAACTTAACTT	CGTCTTTGCCTGTGTCCTGGT		√	√
C3821S314	T/A	TTGACTAAATAAGGTCAGACTT	TCTGATCCTACTTTTACGTGAC		√	√	√
C3827S376	C/A	ACTAGCATAACCCATAGAGTAC	ATCTGACCTGAAAGTACTAAAG		√	√	√
C3833S274	A/G	AATCAGAAATATCAGAATCAGTC	GTAGCTGTCAAGATTGTGAGGC		√	√
C3921S190	C/T	CTTATGAATAGTTTGAACACCAT	CAACCAGCTACTCAAGTGCTGA		√	√
C3929S471	A/T	GTTACGAACTTTCAAGATGGCA	AGCAATGTAATTCACACGGCTG		√	√
C4035S146	C/T	TGAGCTACAGTTCTAAGGAATT	TGTTAGCTACTAGACTGACATT		√	√	√
C4082S257	G/T	CATTATATCATCAGCTAATTGCA	TCCTCCATAGATGTTGGGTCTG		√	√
C4086S118	G/A	GTAAAGTCTCAAATATGACCAG	TGACTACAAGAACCTGCTCCTA		√	√
C4176S381	A/T	ACTTCTTCCGAGTCTCCATCTG	TCTACGCATCCTTCCATATTCT		√	√	√
C4200S250	G/A	CTAGCAGCTGTCCATTCACAAA	TGGCTTTCTCTTCAAATGTCCA		√	√
C4215S96	T/C	GGAGACGGAGGCTTCATCGT	CTCCGTCAATAGAGCTGGTATC		√	√
C4243S204	C/T	CGTTCATCTTTTAATGCAGAGT	TCCAGTAAAGATTTGCCGATCG		√	√
C4345S131	A/G	AACAGGTGAAGCAGGTGTAGCA	TGCTGTGGAAATGAACCAAAAC		√	√
C5047S357	C/T	AGTCTACTTAATTTACACAGGG	AAGGTTAACACAGCAGATCAGT		√	√
C5077S389	C/T	CAGACAATACACGTGGCAGCAC	TAAAGTCCTCGTGAAATGCTGG		√	√
C5087S604	A/T	TGATGTCACATTCTCCATGGCA	ATTTCATCAGTGGTGTCATCCT		√	√
C5163S236	A/G	TACCTGGATCCACCTGTTGATT	ATCTTCAGTATTACCTGGTAAAT		√	√
C5266S223	C/T	TCTACAACACTTCCTATGTCTA	TGTCGGGTGATGGACGTGTTTA		√	√
C5268S134	T/A	CTGCAGGACGACCTTGTGCTTT	CTGGTGAAACAGGATCGCCATC		√	√
C5269S888	C/T	GCCACACCTATAACCGTGATAG	ACGATAAGACGTCGTAGTCGTA		√	√
C5272S212	C/T	TTGGTCAGGCAGCACTGAGGTT	GCAACATGATGCCGAACGTGTT		√	√
C5330S110	C/T	ACAGGAAATATTCGCTGTTACA	TAACGCTCGCTTTGACTTCCTC		√	√
C5369S241	A/G	GAGGAGATACAAACTCCTCACT	CAGAGCTTGTACTGCTCACAT		√	√
C5456S160	C/T	ATTCCCTTGAACATTTGGACAA	GGATTGATTCCATGGACGAGTT		√	√
C5546S389	G/C	ATAGTCGGGGTTCCCCGCCA	TGGTCTCGGAAGTGGTACAGTC		√	√
C5583S231	G/A	TATGTACAGCCTAAGTTTACTAT	TTTCAAAGGCTATCGGTCCATA		√	√
C5712S2028	A/G	AGATGTGCAAAGTGAAACATCG	GAGTGGATAAGCGGAAATGCAG		√	√
C5763S491	C/A	TGCTGAGACGATACGGAGCTGA	CCATGGTACTGTTGACGGACG		√	√
C5808S43	A/G	AGAAGACACCAATCGTCCGTAG	GCGTCATCTTGATGGTCAAGTT		√	√
C5809S286	T/C	ACTGTGTTTGTGTATGATAGCT	TGACGGACATCAGAGGACTTGG		√	√
C6001S593	C/T	AGGAAAACACCACCTAAAACAA	CGCACATCAAGTCACAGTGAAT		√	√
C6063S271	C/T	AATAGTTCATCAAATAAAACTGTC	TGATTCTGGGTTGTATGCCAAT		√	√
C6121S399	G/A	CCTTTGATCTATCTCTGTATAG	TTCCCTGGTCACGATCTGGGA		√	√
C6163S96	A/G	TACTTGGGAAGCTGCACTGAGC	TCTTCTGGACAGAGATTCATTA		√	√
C6196S854	C/T	AATTACATACGAACGGTCTTTC	AATGCCAGCGGAGGTGAGCTTT		√	√
C6224S550	G/T	GGCTATAAGTACATAGAAACCA	CCAAATACAAATACTGCTAACAT		√	√
C6278S56	C/G	TATATCTATGTGAGTTTGGCCC	TGTAAATACATGTGACAGATGTT		√	√	√
C6281S503	T/C	TAACAACAATTGTAGTAACTGTG	GTAAACAACATGACCACAGGTA		√	√	√
C6308S64	G/A	GAGGCATAAATATCCGACCGCA	TCCCAGTAGCCTAACTCCTTTC		√	√
C6309S392	A/G	TCCAGCTTTCAGTCAAGGGCC	GTACCTTCTCCAGCCCATTACA		√	√
C6384S339	G/A	CAAATGAGTTCATGCACATCAG	GAGTCTGTGACCACGTAAGCAG		√	√
C6386S118	T/A	AGATGCTATTTCTGATGCCCTC	CAGTGAAACGAATATACACAAAG		√	√
C6391S541	A/T	CAAGTCGGTGGACTATATTTTC	AACCATCATCAGTGATCAAGGA		√	√
C6435S340	A/G	ACAATATTAATACATACCCAACAA	GCACACATCACATTTCGCTATC		√	√
C6481S146	C/T	TTATCTAAAGCAATAATCAGTTTC	CAGCTAATGGTAATATCTTCTG		√	√
C6574S496	A/G	GGGTGCATTGCATACTCTAGAA	AGTACCTGTGAACCTTTCACAG		√	√
C6578S236	C/G	GTAAGTGTTCAGACCGAGGCTG	TCACTACGAACAATTCCACTGC		√	√
C6585S356	A/G	TACTTTCTATGTGTCTTGTACAT	TTCACAATATTAAAGTTTAACCACA		√	√
C6600S313	A/G	GTGAACAAATTGACAAGGACTT	ACAAATCAAAACATTACACAGAC		√	√
C6615S293	G/A	GAGATAGGGTTTCCAGTCGAAC	ACCACTCCAGACGTGTATGATA		√	√
C6627S116	T/G	GTGATGGGTATAATCTGAATAC	AGACATGCATGCCTCATAGGAA		√	√
C6706S574	A/G	AGCCACGGAAGGCTTCATCAC	ATGTGGCTCCATAGGGGTACAG		√	√
C6709S413	C/T	CCACACCTAGGGCAATGGGG	GACCAACGGAACCTCCAATATG		√	√
C6795S238	G/A	AGTGATAAGTGGCTTTATGACT	GCCTTGTTGGTAAGTAAATTAAA		√	√
C6811S347	G/T	GCTGTAACTGCTCTATCCTACC	CATGTCCAATAAGTAGGTTCAG		√	√
C6816S360	G/A	TCCACTGGCAAGTCCAAGGCA	TCACCTCCATTGTGCAAGCTGC		√	√
C6851S551	T/C	GTATCTACGGTCCTGATTCCAC	TACTCATGGCCTCATAACAAGA		√	√
C6861S271	A/C	CAGTTGTATTATCACGTGTACA	TAACCAATCCAAATCCTGGATC		√	√
C6865S104	G/C	TATAATAAATGGCGTCACTGTG	TAAATGTAATATACTTCGACACAG		√	√
C6880S376	T/C	CTGTGAGTGCTTTGATGGCGTT	GGTTAGGAAGCTCTTTAAAGCC		√	√
C6995S123	C/T	TACCGTTTCCATAGGGACAACC	GAATGACCAATCGTAATTGTTC		√	√
C7027S274	T/C	TTTCAAAGTCTTCTTCCAACAG	GTCTTCGCTGGAGAGCACCAA		√	√
C7058S147	G/A	CTGTTTTGTTTAGAGAAAATCGC	ATATATTCAAGAGTTGCACCGA		√	√
C7100S125	G/A	TTATTAAATGATCCATGGAAAGC	ATATTGAGGATATTGATTCAGAAA		√	√
C7120S198	A/G	TGGGCTCCCTGTTGGCCAAG	ATTAAACTTCTTTTCTGCCTCAA		√	√
C7181S207	G/A	ATTACTGATTGTGTTAACAAAACA	GAGAACTCGTCACCTCAGTTAG		√	√
C7191S353	A/G	TTGGCGTAGACGAAATGTTCGT	TAATCCCACACAAACTCACGCG		√	√
C7280S83	G/T	GATCCATTGTTTTAGCTTTCAATT	AGGAAATCCCAAGTCCTTCGTG		√	√
C7387S242	A/G	GTAAAATAGAAGGCCACAATACT	ATATTGCATAAGGCACTGGGTT		√	√
C7391S132	T/C	GGACATCGTTAATAAAGCCACG	TTTGAAATCGAATGGTTGAAATG		√	√
C7399S686	T/C	CGTGATGCACTATGTAGTCGCT	TACCCAGGAGTGTGCGCCGA		√	√
C7475S253	T/C	TCCTTCGGATCTTTCTTCACTT	CTAGGACGTCTGTATTAGTCGT		√	√	√
C7493S233	A/G	ATCAAGATGATCTGGAGGGACA	GTCGACAGACAGTACTGGTTT		√	√
C7520S195	A/G	GTCCTAGTTCTGTTGGCTTCAC	TCAGCATCAAACTTTTGAAGAC		√	√	√
C7548S270	T/C	GTCCACAAGATCGTCACATTCG	ACACTCCGTCTTCCTGTCATCG		√	√
C7587S270	C/G	TTTTATCATTTGCTACTGTAGG	GAAACATTACGGTTTGGGCCGT		√	√
C7647S553	G/A	TTTTGTATTCTTCTGGTTGAAC	GGAACCCAGTATCAGCACCAC		√	√
C7678S388	C/T	TCAAATACACTGATACATTTTAAG	TTCACCTTCATCAAGGGACACA		√	√
C7692S619	T/C	CAACCCACTGTACATGATGTTT	CCTCTTCTACGAGTAGAACTA		√	√	√
C7728S209	A/G	TGCGACATAGGAAGTGTTAAAG	TGTGTGTAGCTACTTATCACTG		√	√
C7733S76	C/T	AAAGGTATCTATAAAACCACACT	CAATCCGGAAGCTATGCATTCT		√	√
C7748S129	C/T	AGACTCTATAGACTAAACCAGA	CAGGAGTGCATTTTCTCGAGTT		√	√
C7786S448	A/T	ACAATCATGTTGACAAAGTTTCT	TGATTCATTCCTCACATGGTCG		√	√
C7892S352	G/A	ATTACTGTTTCATCTGTTGTTCT	TTTTCCTTCGTGAGTCGTGCCA		√	√
C7922S309	A/C	CACACAGAACATTATGAATTTATA	GATGAAGGACGAGATAGTATCA		√	√	√
C7946S237	C/A	CTCGTCTCACCTATCATATTGC	GGTTCTCCCCACCTCTATATAA		√	√
C9022S197	T/C	GAGGTCTGTTCCACCCCACTT	AGGTTATAGACTGTAGATGTCC		√	√	√
C9129S414	A/G	TTCGTAGCCCGATGTTTGTCAG	CGGTACTGCTCAATCCACTGAC		√	√
C9145S590	C/A	GGTCCGTGTACCCAATATGTGT	CGTTGTAGCGATACAGCTCTCC		√	√
C9155S450	A/G	CGATTTGTTCCTTAGCTGACTT	CGTCTAACATCATTGACAGAT		√	√
C9212S911	C/G	TCTTAAAACTCATTCCTGGTGA	TCATCATCTTTAAGTAGACAGC		√	√
C9232S389	A/T	AAGAGTCTTAAGCAAACATTTTC	ATTCTTTTACGGTAACATTGGAT		√	√
C9285S174	C/T	ATTGTAGTTATAGACAAGAGATG	AGCAGTTATTGTCTAGTCATAG		√	√
C9313S783	A/C	ATGCTCATAACTCATGGGAGCC	ACAATTTGGAGTGTGAAGACCT		√	√
C9338S272	C/T	ATGGTGATAGATCTCGCGGCG	AAGCTAGAGTGCATGTATTGTT		√	√
C9368S389	A/T	CTCGGCTTTATTGTAAACATTG	TTATGTTCGGCTCTGGCTAGCA		√	√
C9381S321	G/A	GGTTGGGTCTGTTACCGTTGGT	CTGTTCTGACCTGCCCGTCT		√	√
C9418S509	G/A	GACATGGCAGGTTGTTATGGGT	GCAGGTAGTTATGGTGACATGG		√	√
C9445S136	C/G	CAATATAGGTCATATTCAGGGG	AATTCTGCTAGCCCGAAGCCC		√	√
C9466S227	A/G	GGTCAGTAGGTTGACCAGTGG	TACCTCCAGACTTTCTGATGGC		√	√
C9505S205	G/A	TTGACGAGTATGAGATTGCCTC	ATGAACACTCCAATTGTCTACT		√	√
C10233S246	C/T	ACGTTTGTATCGCTATTGCAAT	GAAAGGAAGACCCACGTACGCT		√	√	√
C10333S210	C/T	CCGTCCCTTACTGAATATATCC	CTGTTGTAAGACTATGTTCAGC		√	√
C10366S316	A/G	AAAGTGTTCTGGTGTTTGAAAG	GACATTTAAATTGTGTGATAGGG		√	√
C10409S133	A/T	TCACGAGCTCTGCATTCTACTA	CTGCCGTACACCCCTTCACT		√	√
C10416S180	A/C	GTCGCTTGTTGTCGTCTTCGTC	TCGCAAACAAGATGTCCTTATT		√	√
C10478S665	C/T	CATGTATTTGATATCTACAGGGT	TAATGATCTCCAGTTTCAAATGA		√	√	√
C10487S351	C/T	ACAGGTCCGCATCAACATTTTC	CGTCAATGGACGACTGCATCAT		√	√
C10504S508	G/T	TCATGGATTAATTCAATTTCGATA	TGCCTGGTAAGACATGATGGTG		√	√
C10512S296	G/A	GCTACAGTATGCCTTTGAGAAT	ACCTTCGTGTTTGTCAGCTGCA		√	√	√
C10518S671	G/C	CATTAAAGTCATGCTCCAGAAT	CAATATGTTCATCAGGGGCAAA		√	√
C10571S260	G/A	ACATCGGTGGTTATTATCTGAT	CCTTGACAGTATTATGTTATTAG		√	√	√
C10579S179	A/G	GGAGGAGATAAGTTAGTCTGTC	TAGCAGAGGCTACTGACAAGCC		√	√
C10580S104	A/T	CTTGTACTTCCTGAAAATGTCA	CATCCAGCTGTCTACCCAACAC		√	√	√
C10613S199	C/G	TACACTTCATTCTGGACGATCC	GGAACAGCTACCTACAGAATGT		√	√
C10615S426	G/A	TTGAAATAAACTGAGGGGTGTC	AGGTGTCATGCCCGTAAGTCTT		√	√
C10620S293	C/T	GAAAGTGAAATGAAAGAAGCCTT	TTTTGATAGGGATGGGAATGGA		√	√
C10628S270	T/C	AAGCTCCAATCAATGACTCTGG	CTATTAACCCCGATCAACTAAG		√	√
C10657S442	A/G	CTTGAAGCTTGATGACACCGGA	GGGCACTTCTGGAGAATACTCA		√	√
C10682S135	A/G	CTAACTTGTTACGTTCCTCCTG	GAAGTTCTGACAGAAGTTGTGC		√	√
C10740S168	C/T	TCCTACGCGAGGGAAGCAGTAT	AGAAGATTACCCAGCCTTGTCG		√	√
C10745S115	G/A	AGTCTGTACGTAACCGGTCGAC	CTGACATCAAGTCTGGCCATAT		√	√
C10760S410	A/C	ACAGCAAATAAGTAGTTCTTTGT	CTAGCACACGTTCTATCTCCTC		√	√
C10809S291	G/A	ATGCCAAGACACTGCTCCCAGT	ACTACTTCATCGGTGCTGTGTT		√	√
C10841S477	A/G	TGGGTACTCATCCAGAGTACAT	GAACAATTATGAGACCAATTCAT		√	√
C10873S353	T/C	CCTTGTCTACATTAGAACTTCC	CGGCATTCTTTAGGATATCACC		√	√
C10885S271	A/G	TGTAATGTTGGATGACTTCAAAA	CTGTTATCATTTAAATACGCAGT		√	√
C10889S607	C/G	GCGTGTTGAATTCTGCAGGTAC	CAATTTTCAGAACTGGTGCATC		√	√
C10911S112	A/C	AGCTCTAGCTGAACCAGCCAT	GAGGAACTGGTGTCAGAGGTGT		√	√
C10926S476	A/G	TGACGATGGCAGTGTCGTTTCC	GAATGATGACGGGCGGCGGT		√	√
C10973S307	G/A	TCAACAGATATAATGGTTTGGG	CTGTGGTATATCTCCAGGTGTC		√	√
C11052S395	T/C	TCCATCGTGGTAAATTTCACAC	CCCTTAGTGTGCACAAGTATCG		√	√
C11090S978	A/T	GTATACCTAGTGTATAAGTTGTC	TAGTTTAATAGGATATGAGGGAT		√	√	√
C11178S398	G/A	TTCATACAAAGTGTGTCAAGTTT	CTTTGCCCTTCCTTGACCTTTT		√	√
C11209S265	G/A	TTCATTTGTTTACTCATTGGTTC	CCTCCTGAGGGATAGACCCTT		√	√
C11222S308	C/T	CTATGGATCCCTTGTGTGTCTA	AGTGATACATGTGTAGCATCAG		√	√
C11315S248	G/A	CCTCTCGATGTCAATCTCCATT	CCGCTGCATTGACACTGTATCT		√	√	√
C11333S191	A/T	TCTGTCTCATCACTACATCCCT	GAATCTCGCGGCGACTTTGTC		√	√
C11379S301	G/T	TCTGTAAAACTGTTTGGAGCCT	TCGCCTGGATCCTCTTTGCCT		√	√
C11389S376	C/T	TAAGAAAACCGCCTTTCATGAC	CAGGATATAGAAATACCGAAAC		√	√
C11406S421	A/G	TGTTCGAGTCTAATTCACGCTT	CAGCTTCCAGTTCCAACTCCTC		√	√
C11413S333	C/T	GCAAAGATGTCTTACACAACTG	ACTGTCGTCAACAGGTCGGCAA		√	√
C11455S210	G/A	CTTGGCATATCTTGATGACAATT	GTCTCTATGACAGAATTATTAGA		√	√
C11489S738	C/T	TGTGACCAGGAGGCATTTCTGG	GTATGTTGGCTATGCGCTCTTC		√	√
C11507S384	A/G	TTGTCCTGTACGCCTTTAAAGT	AAGTCCTCCAATAGACTCTCAG		√	√	√
C11511S359	C/A	GTCTGATACACCATTAAGTGTTA	TTCCTCAGGGCATCAACAGCAT		√	√
C11547S421	A/G	AATAAAGAAGAGGTTCGGAATC	AACGCAACAGCCAAAGCTTGTG		√	√
C11549S155	A/G	TCCTTGCCTTGAATTTCCCACT	CATTGTCACGATCGATTGGAGG		√	√
C11555S329	T/C	AGTTATTTCCCCTGGACAATTC	CTCTTCCGTTAGTAATCAAACC		√	√
C11568S174	T/C	GATAACAAGATAGCATCATTTAC	CTCAATACTCAAGGGGTTCTCG		√	√
C11570S864	C/T	CCTTGTGATATAGGTTCACAGG	CGGTTGAAGTGGTGCCCAATC		√	√
C11591S456	C/G	GGGAAGTAGACCACTGCCATC	GTGACTTGAGAGCTGCCTTATG		√	√
C11606S441	G/A	TCTGCTTCAGATCGGCAAATCG	CATAGGAAGGGTATTTCTTCG		√	√
C11621S368	G/C	ACCATTAAATTCAAACTTACAATC	TATCAACTCCACGACCAGAAGC		√	√
C11647S378	A/G	TGTCTAAGGCCATAGTCACAGC	TGATGGCACGCTCAACGCCATA		√	√
C11674S245	C/T	GTGAACATGAAATTAACGTCCAT	AAAATCTGACATTTGACGAGCG		√	√
C11680S134	A/G	GGGGATCCTTGTCCAGGAACA	ATACCTCGAAGTCGAATACCAA		√	√	√
C11692S378	C/T	TATCTGATTCAGAATTTCCTCC	CTTTCTGAAGAGATTCATAAGAT		√	√
C11724S148	T/C	AATTGGCATTGATCAAGTGGAA	CATCACCGGCACCCAGTGTG		√	√
C11730S550	C/T	GTAGTGCCTGTTTAGAAATAGC	TTCTCACTACAGGGATAGTTGT		√	√
C11741S204	T/G	TAATGATCACCTCCTGTATAAC	GTCCCATGCCCTTCTCCATTTT		√	√	√
C11761S237	G/A	TAAAACTGACTTTGCATGGCGA	TGGGCAATAATTAGCACTGGAT		√	√
C11782S150	A/G	AGTAGTACGAAATTATTGCAGTT	AGGTGTGAGTATAACAAAGTGT		√	√
C11793S188	C/T	AGAGATTGAGTCAAGATATGATT	AATCACAAGGCTCCTTACAAAT		√	√
C11847S58	G/A	GTCAACGCCTGTAAAATCACAC	AAGACTGATACCCGTGTTATCT		√	√
C11861S277	G/C	AATTAATGTGAACAGATGAACAC	ATCCTCACGTGTCGCAGATACA		√	√
C11881S257	C/T	GGGGTTCTGTCTGATGTCATC	CAGCTTTAAAACCAAGGTCAAG		√	√
C11893S367	G/A	TTTGGCCTGCTGTCTCTCAGCA	TCCAGTCCCTGAACCTTACTAT		√	√
C11950S469	A/G	CCTGTATCTTCTTGTTCATGTC	GATATTTCTGATTGTCTATCTTAA		√	√
C11960S210	G/A	TGTGTGTCCGGTAGCCTAGTTT	GCCACTCTGGCATAATCGTGAA		√	√
C11976S330	C/T	CTCACTCTGGTTATCCGATTCC	TTCAGCTTCCGATTCCAATCGT		√	√
C11986S320	T/C	CGTCATCATCGTCTGTAAGGGG	GTTTGATCACAAAAGCTACGTT		√	√
C11991S452	A/G	TTGGTTTGTTCCTCCCATCATG	TGATCCCGGGAAGTTACCCA		√	√
C12004S158	A/G	ACGAAGGGCTCACGTGCGAG	CTATTCTCGCTAACGGGCACCA		√	√
C12037S361	T/G	GGATTGAGATTTGGCCGACACT	ATCTTTGTCATTTCCCGTAGCT		√	√
C12063S464	C/G	ACATTAAACCTTCAAACGATGAA	ACAGAAATACCACCATCGACGA		√	√
C12109S147	A/G	CATATTTGTTGTGAATATACAATC	TGTACGGTCCCGACTTGGGT		√	√
C12164S294	G/A	TGTTATAGGTCCCTATAATGGC	CTCAACAAGTGGGAGTTTACT		√	√
C12179S346	C/A	ATCATTCACACATGGAATGCTC	CTGCCGCTGTAAGCTTATATAC		√	√
C12265S317	T/A	AGATGCGGTATGCGCCAAGCAA	CTTCAATGGTATAAGTACAAAAG		√	√
C12348S663	G/A	TGTTCTCCAGCTGCCAGGATG	GATCTGGTTCTACATAACGGCC		√	√
C12353S130	C/T	TGCTTCTTTCTATTGGCCTTGA	GCTGGATGTTCTTGGGAAGCAG		√	√
C12412S384	C/T	TGGTCTGGACAACCTTTGATAT	CCATTAGTTCGGAGTAGTTTAT		√	√
C13023S210	T/G	TATTGTGTTGTGGCGTTGCACT	CACACGAATGCTGTAAACCTGA		√	√
C13026S351	A/G	ACAATGAAACAAATTTACTATCAC	CAACATTAACGCTTTCAACATAA		√	√
C13031S489	G/A	CACTGTAGACCATAATGAACTT	TCAATCTATGATAGAGTCTACAC		√	√
C13037S159	C/T	CGTTTCCTTTTAACGCAAGACC	GATTTAATGATGATGGATTCCAG		√	√
C13164S89	G/A	TACATGTACCTGTGTATTACATA	ACTTAGAACTATGTTGTTACCTA		√	√	√
C13181S375	C/A	TTGCTGATGACAATACCTACTC	GGCTCAGGAAAACCAGAAAGG		√	√
C13205S904	A/T	GGATGAGCGTCCAAATCTGATG	GAATTACCCTGTGATGTGGCCG		√	√
C13251S271	C/T	GCATTGTAAGATACAATCGTGAT	TTCCAATTTTATCGAGAAAGAAG		√	√	√
C13258S339	A/G	TTTGTGGTACAGGGCCTGCAG	TCAGAGCCTCCACCATTCTGGA		√	√
C13266S372	C/T	GTCTAGTGATTGTCTCAATTTG	GTGTTCCTGCGCCGGACTCT		√	√
C13334S130	G/A	TTTGCCATGTCTGGTTCCCAC	CTCACTGAACGGGTTTTATGAC		√	√
C13356S1193	C/A	CACAACTTTATCAAGAATCCTCA	CACATTCATACAAATTCCCATC		√	√
C13385S421	A/G	TCCATGACAGGGCGAACCTGTT	GGAAGTAATCCAATGACAATTG		√	√
C13429S174	A/G	CTTCTTTCGGCCGAAAGCATAC	ATCTAATGCATCACGTGACTTA		√	√	√
C13430S228	C/T	CATTCTCTTCATATCTCCATAG	TCTGGGTCCTCCAGCCTCCT		√	√
C13455S296	A/G	ATTAGATATCGTAATGTCTCATC	AAAATAGATGGTCATCGTTGTC		√	√	√
C13506S205	C/T	CAAATTGTGGAGAGTGCAGAAG	GCTTTCAGGGAGGTTTTACCAA		√	√
C13513S198	A/T	AGGACCTTAAACTGCCTGCACT	CAAAGTTAACGCTGGACACCTC		√	√
C13514S91	A/C	TGGTATCAGAAACACGGTATCA	CACTGACAAACAAGGTGTGTAG		√	√	√
C13541S381	T/C	ACAAGCATTGGCGTTATAACGA	TACTGTACTTTAATCGCATATATA		√	√
C13555S183	A/G	TTTCTAGTTTCCCTGACCATGT	AGACATGATATGAGTCATTTATAT		√	√
C13565S452	A/G	GAGGTACAGGTGACCTGGTATG	GTTAAGATGATTGTCTAACACAT		√	√
C13569S523	T/A	TCTCATTTTCTCTCTCACAGAT	TATAGGATCACCACTTGAATCA		√	√
C13588S562	A/G	GATCCAAGTTGGTTTGTACTTT	GTGATGGCAATCTTAACAAGTA		√	√	√
C13593S249	C/G	ATAGACCGTCACAAACAGCTGG	CTTACAGCAGGAATAACTTCCT		√	√
C13596S416	C/A	ACTAAGCTGGAAGGGTCCATTA	TACTGTTTAGTTAGAGCTAATCA		√	√
C13664S482	T/G	CATCTGTGTCAGATATATGATTTT	GTAACGCTCCTGCTAGGTCTAA		√	√
C13675S241	C/T	GAGGTCAATAAACAATGTGGCA	GAACCTATCAAAACCCTTGGGG		√	√
C13735S449	T/C	ATTCCTGTGGCAGCAATGGCTG	AGAGCATAACGCCTCTGGTTGA		√	√
C13743S270	G/A	CATTATACGAAAATGACTTTCTC	GTTTGTTGACGTCACTCTCTAG		√	√
C13754S1077	T/C	AAGAATCAGTACTGGTACTTAG	CAGACATCATTTCCTGATTATC		√	√	√
C13770S263	T/A	GGACGATACCCGGCAGTGTTT	AGGATGACGTAATCTGATTAAAC		√	√
C13773S358	G/A	GTCTTCTTCAGTAAACAACATTTT	AATCCTCATTAGCACACTGTCC		√	√
C13785S292	T/C	ACATGTTCCCTGGGGCCCTC	GGTCCATCCTCCTGATCAGCT		√	√
C13795S1178	T/C	TAGTCTCCTATCACAAGACTCA	TTGCCAACTGCAATATCAGCAA		√	√
C13802S302	C/T	ATTCCACACTGTTTGATCTGGT	TAGACTTGGCTTTTGTACTGGA		√	√
C13852S296	A/T	GAATCTGCTGTTCGTAATCCTC	GTTTCTCACGGGCCTTCATGTA		√	√
C13859S220	A/T	CATATATTCCATATATGGACAATG	AATTTGCTTTGCCTTATATTGAC		√	√
C13860S575	G/A	ACACCAGGGTGAGGTAGATCTT	CGGTAAAATTTGTCTGTTCTGG		√	√
C13871S663	G/A	CTCCGACAAATCCTCCTACATT	CAATATTAATTCCGTTTCCTACT		√	√
C13886S459	A/G	TCTGTGTACTCTGTATTGGACC	CCAGCTGACTTATCTGGGCCT		√	√
C13901S758	T/C	TGGCTTCAATCAGATGATGACG	CAGCTTCCTTTGTAGAATGTCC		√	√
C13948S130	C/T	CGGCCAGACTTGTTTATCATGC	CGCGAATAATGGAGACTGATCC		√	√
C13964S958	T/G	CCACAGGAGATGTAAGCACATA	CTCCTTTCTTGCCAGATGTGCC		√	√
C13989S316	G/C	GTTTCTCTCGCTCCAGCCATTG	GAAGATATGCCCTCTCAGCCTC		√	√
C14020S129	C/T	TGTATAGCTTGGATTTCTCTCC	CATAAGACCGAAGTTGCACTGG		√	√
C14033S260	G/T	GCCCTATCTCTACTTAGGTTTC	GTCAGTATAGCGCAAAATCGAA		√	√
C14045S191	A/G	GCGGCGGACAGACTTGGCAT	CGAGCTCCTCAAGGATATCCTC		√	√
C14066S197	G/A	CACTGTCATAAAGCAAAGTTGC	TGTAAAAGTGGAAATTCTGGTG		√	√
C14097S178	C/T	CTCGGGCCTTGTTCATTCCTTT	TGTTGTCAAGGTGGTTGACCTC		√	√
C14117S160	A/G	TCCCCACAGAGGCACGAGAC	GTACTTTGTGTTACTGTCAGTG		√	√
C14148S220	C/T	AAGGGCTTCTCTTTTAGATTCG	GTTTCATTCATTAAGTTGGAATTG		√	√
C14182S231	A/T	AGCGACTCTACAGGGTATTGCT	CACACATAAAGGTCCAGTTAAC		√	√
C15003S544	T/A	AAATCACATCCATTAGACTCTC	AAAACGAATGGAATACATGGTC		√	√
C15042S86	T/G	TGGTATTGATGTGCCTGCCCC	GACCATTATGGATCCTCGGAGA		√	√
C15064S449	T/C	TTGGTCCATTTCATATTCTACC	GTGAGCGTTTGACGGAATTTTC		√	√	√
C15070S409	A/C	AAATTACAGGTGAGCCACAATC	ATGATTAGTGTTAACACATGGAG		√	√
C15075S96	A/T	GATGTCAAGGAGTTGTGATGTC	TTCATGCTGCAATCCATTCCTA		√	√
C15083S233	C/T	CTCAGGATCATCTAGGTCCAGG	ATCTATTTGTGTATGCATTTGATA		√	√
C15095S193	C/T	AGGATGGTGAACCGTCAATAAT	TGTACTCGGGGTCATGGTACC		√	√
C15106S377	A/G	GTTAGTAAGGTAGCCTTCAATT	ATTTCACTCTCAAGTACAGTTTT		√	√
C15155S370	A/G	TCCTAGCCAAAGATAGCAGCCT	ATACCTTAGAAGAAACCATGAAT		√	√
C15160S177	T/A	GATACATCAAATGTCATCTGTAT	TCAGTGTCTGACACTTTTACAA		√	√
C15163S164	A/G	CAATATTATTGCCGTCAATATTAC	GGAGAGATGTTGTCCTTGAGCT		√	√
C15179S261	T/G	CTGGTTTCAAACCTTTGGAAGA	ACAGCTTCAGCAACAATAGTGG		√	√
C15188S397	T/G	CTGCTAACTGACCGTGTGAACT	CGTGGTACACCAGTTTCATCAA		√	√
C15280S83	A/G	TGTCTGTGATATTTTGTACATGT	ACTCTGTGTGAAGGCACAGATA		√	√
C15292S308	C/T	ACAACTCGCATCAATTGTATTAT	TGCCATATAGCAGGAGATGGAC		√	√
C15320S379	A/G	CTACAAGTGTTGTGAGGTTCAA	GCTTACTAACAAGTGATATGAAA		√	√
C15334S229	G/T	CAATGTCACCAGGTTGTATGTG	ATGATTGAAGACTACAAAGTTGA		√	√
C15349S217	A/G	TTTTCGACACAGCATTACTTTC	TCAAACTTTCAGGGCCACTCAA		√	√
C15387S255	G/A	TTTTCTCTGTGTCATGTGACGT	TTTGTTTTACCAGCTTCTTCTC		√	√
C15489S369	T/C	GGAGCATCTGTAGTGTTGACAA	CTACAGTCTCTGCTGTTCCTTT		√	√
C15496S440	T/G	TACAGAGAATCGATGATCACAA	CTAACGACGATGAGATTACG		√	√
C15497S556	A/G	AGAGTTCAGTTCAATTTGTTCTT	TACTAACAGTAAAGGTCACAGG		√	√
C15532S188	A/G	GGGGATGCTGGGAAGTTTGAG	AGAGTTACAGTTTACAGAAGCT		√	√
C15539S517	C/T	TACCATTGTAATCAAACCAGGC	AGCTAGGGATGATTATATGGTG		√	√
C15545S114	A/G	TTCCATGGAGACCGAGATGGAC	AAAGGATGGGACAATAACTGAG		√	√
C15581S65	G/T	TATAGCAAGAAAATGCAAACCC	GTAAACAAGACTTCAAATCACC		√	√
C15589S1508	A/T	GGTATCCACGATTACCATACCC	CACCTCGGAAATTTCTTCGAGG		√	√
C15595S404	A/T	TCAGGAAAATTGTATAAACTTGAT	ATATTCATGAAACCAAGGCCCG		√	√
C15596S142	G/C	GCCACGCTCATATTCACAGATC	ATACCTGGACGACTTGGGTTAG		√	√
C15607S277	T/G	GGGTATTACAAACTGAGATTATA	GTATATTACACATCTTTGATGTAG		√	√
C15640S137	A/G	CGCCTCACCCACGTCAGACA	TTATACTCATGTTTGAGATGATAA		√	√
C15644S268	C/T	TTGCCATGACGTATTCTACCGT	CCCGTGAGCTGGGAGATGGA		√	√
C15671S690	T/A	TCTTTGCTTCGTCCTCTGTCAT	GTTCTTCCTGTTTGAGAATCTC		√	√
C17019S301	T/A	TGTACGAGTGTTTGGAGGGAGG	TCAACCTACTACAAGCCTACAT		√	√
C17025S194	G/T	CTCCATTTTCCATGGCATTGGC	TGTTCATGGTGCCAACCACTTG		√	√
C17027S106	C/T	CTGCTGTTTGAGGAGAGTTACC	GCTGTGGTATTGTGGATTTCAG		√	√
C17061S451	A/G	TCGGAGAACGATACACCACAGA	GATCTTCGGCTCGGACTACC		√	√
C17096S325	A/G	TAATCCAAACCATCTTTGACTG	ACATCCTCTTCTACCGGTTCTT		√	√	√
C17107S789	G/A	CATGTCTCACCGTTTCCGGTAG	CGCTACGTTGCTTTGACTACAG		√	√
C17188S727	T/C	GGCTGCATCCAAAGGCCACCA	TCATACAACGTCTGGTCGAGTG		√	√	√
C17205S686	T/C	ATCCCAGTTTAAATGTGATTCC	CGACTGGTATCCTTTAGGTCC		√	√
C17374S276	C/T	ATCAGAGGACATCAAGACCTTC	GAGACAGATTTCCCTCCAGGGA		√	√
C17404S294	G/A	TACAATGTTCACAGATGACTTC	TGGCTGACTGTGAATCTCCCGT		√	√
C17429S489	T/G	ACTGGAGCCGAATGTGGACCT	CAACAGCTGGTTTGGAGGTAGA		√	√
C17443S328	T/C	CATGCTCGCAATGCTTCTGTTC	CAAATTTTACCCACAAATGTACA		√	√
C17565S208	T/C	CGTACTCACAACAAGTATCATT	CCATATCAGGTCCAGATGACCT		√	√
C17571S392	G/A	TACACCTCACAATATCAGTCGC	AATCTCGCGTGTAGTTCCCCG		√	√
C17595S159	G/C	TTTGGGCCATCGTCGGGAACTT	CACTTATTCTTCTGATCGGATT		√	√
C17605S273	T/C	GAGTTGATGACATCCTTGCTGA	TACCTCCTTGATGTTGAGGGAA		√	√
C17660S588	A/G	CTTTCTTTTCTTTTCCTTCGTC	CAATGGTACCACAGTATATCAC		√	√
C17743S328	G/A	CAACGGAGAAGTCGTCAATGAG	GTCTAATGCCACAAGCTCATCG		√	√
C17744S083	C/G	ACCTCATCGCGTGGCTTCAC	CCTGTAGATGCTGAAGTCGCTC		√	√
C17790S316	A/G	GTTTCCTAGAAGTTCAATTCGC	AGACAGCGACGGTGTTTGGCT		√	√
C17803S726	A/G	ACTGACACTCTATATTACCGGA	CTATTGGCTGGCATTGTTCTCC		√	√
C17805S269	A/G	TCAATGTCACCATACTTTGAAAA	ACTCAATGGTATCCTCAGTAGT		√	√	√
C17826S65	C/T	ATCCACCTCGCGAACTTTCGAT	TCATTGACACCAATATGGCCGA		√	√
C17848S274	G/A	TGATGACAATGAGAACAACGAC	CGATGACACCGACCAACACTC		√	√
C17878S235	A/G	GTAGTACTGTTGTTTAACATATCT	TATCACCTGGGTCAAGTTGTTA		√	√
C17915S416	T/A	TTGCTCTCTCGTGACTTCTGTT	ATGATTCAATTTGATTATCTCTGT		√	√
C17921S281	G/A	CATCACATAGATAACGACCATT	ACTGACCTTCATCCCCGACCT		√	√
C17927S289	A/G	GGCAAGCAAAGATTCTGAGTTT	TTGTGAGTCAGCCATGGATGAA		√	√
C17943S479	G/A	CTTTCCTGATATCTACATCGCA	TGATACTGTTGTATGTGGTCTC		√	√
C17950S507	T/C	AATACATGATACATGTCGTTTTC	ATTTCTTAGGTCTCATGCAAATT		√	√	√
C17954S841	G/A	GGTTCAGTCCTGCCAAGTGAAA	TGTCCAGTTCCAGGGGTGTAAT		√	√
C17996S663	C/T	GCTGCTGGCAGTGTCCATGATA	GTGTTTAACTCAGAGTCCCTCC		√	√
C18099S475	C/A	ATTTGAGGTGTGATGCCAATGC	CTCCATTCAGGATGTATACTGG		√	√
C18104S313	A/G	ACCGAAACGAACCACTGAAAAT	CGAGACATAAACGAGATCGACT		√	√
C18161S701	A/G	CCAGGGTATTTGATTCAGGAGA	TTTTCTTCCTGACGGCATTTGG		√	√
C18183S252	T/C	TGGCACTGTCATGGGCACAATG	GTAAACACAAGTTCATTGTGTAC		√	√
C18249S512	G/A	ACCGTTGCCATCTTCGATACTG	GTTGTCGCTTGAAGAGATACAG		√	√
C18254S254	G/T	GTATTGATGGTCTGTACAGAGC	GTTCTAGTTATATGATGGAGAG		√	√
C18285S790	G/A	CTCTTAAATTTAAGGGTAGCTTT	AGGCTGCATCCCATTCAAGGC		√	√
C18359S608	G/A	CATTGTACTGTTTCCAGAATCA	GTATCATTAAAAGGCTTGCTTTC		√	√
C18415S274	T/C	AACTTACTCCAGTTTTGCTTGG	CCATATTCCACTCACGTATATC		√	√
C18438S239	G/A	CCACACGATGGAAGATGGTACC	AGTATCCTTCCATACATAGCTG		√	√
C18443S163	A/G	TCTCCTTACTGGCCTTAGTAAC	TGCCAACCTTACTGGTAACTAA		√	√
C18475S582	T/C	TTGGTGAGGTTGAAGAAGTTCT	ATGGAAGTGTTATTCGTAAACG		√	√
C18500S239	T/C	TTGGAACACTTATACGCAAAGA	AAGGGGATATCTCTGATGACAA		√	√
C18521S587	A/T	GTTGAGCTTACCATAGGATACA	TACTTAGATTATTCAAACCTGTG		√	√
C18559S563	G/A	GGAAATCGAAGGCTGCCTTCGT	TGGCTTGACTCATATCATCATT		√	√
C18562S1428	T/C	CCTGTTCGCTTTCTCTGTGCTC	TCAAATTCTGATTCTGGGTCTT		√	√
C18567S288	A/T	CACATATCTCGCATTCTCTACC	TACGAAGAGCAGAATCAGACCA		√	√
C18647S447	A/G	GCTAAGGGTGACTCTTGGGATC	GCATGAGGGGATGTCGTCCT		√	√
C18669S492	A/G	GAGCAAGCGCTGGTTCCTCC	GTCATCAATCCTGATGTTGAGG		√	√
C18672S560	T/C	TCTTGATGAACTCGGTAGTGCG	TATCCTTGGCAATGTTACAACG		√	√
C18691S333	C/T	GTAACTTCGAATACGGAGAGAC	CGAGTCTTCTGTGGAGTACTGA		√	√
C18736S407	G/A	ATTCGTCGTAGTCTTCTAACAG	GTATCAGGTAAGCATGAAGCAT		√	√
C18750S439	T/A	CTATGATGTCCTCGTTAAGTGC	CGTTGAAGCCCCTGACTTTTGC		√	√
C18761S387	T/G	TCTTTTCAAAACAGCAAATACGA	TACCGATGGACTATCTGCATCT		√	√
C18872S218	C/A	AACTTGAGCTCTTCATTGTTGT	AACTCATTGAAGTTACAGAAGAA		√	√
C18925S236	C/G	ATTTCTTGTTTTCCTTGCGAAG	TACATTCTCTCTCTACATGTCT		√	√
C19044S184	T/G	ATCCAGCTCCTTCAGAATTTGT	TGGATCAATCGCCGCAACCATT		√	√
C19091S785	T/C	TTTCTTACCGAGATATTTAGCAA	ACCTGTGGCAACTTCTCAACTT		√	√
C19109S250	G/A	TATCATTAGCACCCAGGAGAGC	CCCACTCGCAGGTGACTCCA		√	√
C19125S638	A/C	AAGATGTAGCTCCGGTCTGAGG	CGTGTTCCATACTTGTTGAACT		√	√
C19263S208	T/C	CTGTTCAACGACCTTTTAGCAG	AACTTTTCACAAAATGACTTCGA		√	√
C19412S43	A/G	AAACCAACGACGAGAACCGCCA	CATACAGCCTCGCCATGTTAGC		√	√
C19465S404	A/G	CCTTTGGCACTGGGAGTTCTTG	ACAATGGGCGTTTCTTTTGGTG		√	√
C19634S256	A/G	CAGCGGTGGACAGAAGATTCTC	AGGCAAATTGACCAGCCGGGT		√	√
C19956S205	T/C	GTACGACTTTGCGTCCCTGACA	TACATCTGTACTTTGGGTTAATG		√	√
C20113S119	T/C	TAGCTACCATCTTAGCACATTT	TCCTAGTCACGTTGGAAAGTAA		√	√
C20117S326	C/G	TCCAGCTGTTTAAGGACGCAAC	CTGTAAAGGTCAAGGACGCGAC		√	√
C20207S199	T/C	GAGTACCCAAGGTCGGTCAGTT	GGTCTGCCTGGTCACTGAGT		√	√
C20298S457	A/C	ATACTATTGTTTCCTGAGGCAC	TTACCTCCCTTTCTTCAGAAAT		√	√
C20431S256	A/T	CTGGTTCAATTATTCCACTGTT	GAACACAGTATCGCTTTGGTGC		√	√
C20453S978	C/T	GCAACTTTTACATATTAACCGG	AAGTTGCTTATTCTCAAAGAGTG		√	√
C20525S387	G/A	TGTCTTTGTCCCTGAACAGAGC	TATCGGTCTGACATACGTGATG		√	√
C20579S292	T/C	CCCAAGAATTCTTTACCGTCCA	CTGTGGTCTCAAACAATCCC		√	√
C20583S942	T/C	AGGACGAGATGAAACAGGACAT	AGATCATGCCGACTCGTCTTGA		√	√
C20666S453	A/G	CCGGCATAACCCCTATGTTACA	TCCGACAGGTGTTCAAGGATCC		√	√
C20815S313	G/A	TCCAAGCATTCTTCCTGTTCTT	GGGCATCACTGGCTGGTGCT		√	√
C20877S357	A/G	CACACATTCCATACATTTGTTC	AAGTACCACTGACAACAAATTC		√	√
C20915S243	T/C	CTGGCCTGTATGGCAGCGTC	ACGACAACAAGTTCAGGATTGT		√	√
C20936S241	T/C	CACATCTGTGCTGTATTAAAATC	GACGACTTTCTTGTTCCTCAC		√	√
C20939S285	T/G	AGTTGAAATGACCCGTACATCG	CTCTCCATACAAGATCGTTGTT		√	√
C20958S287	C/T	AGAAACTCACTGAAGAAGATCC	ACAAAACTTATCATCATGGAACG		√	√
C20984S486	A/T	CACGGTTCTCTCATTCAAGTTC	ACTTCCGAACCGGAATAGCTAG		√	√
C20990S302	T/C	GCACAAACGGTTCATTTGTTAA	TCATGTTTCCTGCTGAAGAAAA		√	√
C21017S1135	G/A	AAATAGTTCCACTACACACACT	CATGTTACATCATCCTTTATACG		√	√
C21109S619	G/A	TCACCTTCCTCATTGGACGCTG	TTGTACGTTCCAGCGTCGCC		√	√
C21207S140	C/T	CACGTATAGAGGGCTTGTTGGC	TCCCTAAACTAATGAACACAGG		√	√
C21212S650	G/A	TCTCGTCATCTCGAAGGTAGTC	GACTGCCATGTGACATGAGCTC		√	√
C21378S413	T/G	GACAGTGGACAGACATGTTTCC	ATCATTTCGTCAGTAGTTTGATG		√	√
C21474S552	A/G	CGATGTTTCTGTTCCTGTCGT	TACTATGTCAGTAATGTACAGTC		√	√
C21478S288	T/A	TGATCTCAGGCCCTTTGGTGTC	CGATAGCAAGAGGACGGCGATT		√	√
C21511S343	G/A	TTTTATTTCTCCATCCCTCTTC	AGTCACTATCGCTGGAATCTGA		√	√
C21562S322	C/G	TCAGGCAAGAGTGTGGGCATAT	GCACTGGGAAATTGAGGCATAA		√	√
C21614S560	G/C	AGGTACAGTTTACCTCCCGCCT	ACTTGCATTCACACCTGTTGCT		√	√
C21708S406	A/C	TGAGCGCCGATTGGGTTGGTT	CATTAGAACTGTTTCCGTTTGT		√	√
C21798S142	G/A	TATTTGAACTAAATTTCGGATATC	GACATCGAGATGGGGTTTCTGT		√	√
C22072S344	C/T	GTGCAGCAGCTACCCACAAC	CAAACGTATGGTAGAGGGTGCC		√	√
C22088S298	C/T	TGTTCGTCTGTGATGCCGGTCA	AGAGGGATCAGTTTGTGGTGAA		√	√
C22103S737	C/G	TTTTGCCCAGAATGTCGCTTT	GGCCGCCGGAGGTCAACATT		√	√
C22158S42	A/G	ACTCTCTGCTGCAGCCTTCTTA	AATCGTACTCCTGCCTCGCTTA		√	√
C22162S1302	G/A	TTGTTCAAACTGTAGCATAAATC	CTTCTACAAGACCACTTCCAAA		√	√
C22274S236	A/C	CTACGCAACTTCTACAGAAACA	AGAAATTCTGTGTAGGTGGGAA		√	√
C22450S217	G/T	TGATGATTTCTGTCTCTATCTTT	TTCCAGTGTTAAAATATCTTTTAC		√	√
C22497S150	T/C	TGTCACTCATCTGTTCTCCAGT	ATTCCTCATCCAGAACAACATC		√	√
C22557S133	A/G	ATCTTTCCTTACAGGATGTCTC	ATGTAATGCACAATACCCAACC		√	√
C22697S1200	C/T	TTGTCTGAATTCACAGATGAGG	CTTAAAGCACAATCCATAGGTT		√	√
C22699S265	C/T	AAAGTTCTTTCCTTGTCCGATC	GGCAGTCACATCACCTGTAGAT		√	√
C22733S173	C/A	AATCCATCGTCACTGTTGTCTT	AACACATTACCGACGGATGATG		√	√
C22742S81	A/G	AGGAGCATAGTAGAAAGCAGGC	GCCAGACTCAAAGAAACAGGGG		√	√
C22750S194	G/T	TCATGAAGAAACTCAAGGAGAA	AGTGTCTGTCTATAAAGAACCA		√	√
C22770S224	T/A	CATTTTCGTCACGTTTTGAAAC	GGAAAGTTTCCCGGATTATCTG		√	√
C22903S228	A/C	ACAAGGCGGATTTTCATTGCCA	TTGCCCTGGATGTAGGCCTACT		√	√
C23058S276	G/A	TGAGACTGTAGAAGTTGGCCAC	GCTTTGTTAAGTCTCCACGTTC		√	√
C23092S574	A/G	ACACAGGACTGCAGTGTGACC	CCTCGTGTTCTGACATTGTCTG		√	√
C23465S399	G/A	CAGATTCGTGTTTGCTGCTGTC	AACATGGCAGGTCGGTGTTACC		√	√
C23819S200	A/T	TCGATCGACTTTGCTCACGACT	AGAGTCAATAGTATCTTGTCCA		√	√
C23869S267	T/C	GTAGTGGTGTTACTCCAGCCTT	GTAAACCAAACTTCAATCTTGTG		√	√
C15302S530	G/A	ACTCCAACGTGGGCTCTAGCTA	ATGGCCGTAACTGTATTGTATC		√	√
C2140S132	A/C	AGAAAGTGTGGTTACACGGTAG	TCGGCTGGTTGTACGGCTTCAT		√	√
C10652S155	T/C	CTCGGCCTGCTCAAACTGTAC	CCTCCCGTCTACGACTTGGAT		√	√
C10769S224	A/G	ACGTTGTGAACTGGGACAAAGT	AGAACTTACATGATGCCACCAT		√	√
C23956S1013	T/C	TGTCAGTTGTAAATACAGTGAC	TAAAGTAGCGGCCTTTCTTTTC		√	√
C24041S434	T/C	TGCCTTACTCCTACAGCAGCAC	TGACCAGATGATGTCACAGTCG		√	√
C24071S279	G/T	GGGTCTGGATCTTTGATAGGTC	GTCTCACACTCCTTCAAGGT		√	√
C24074S174	A/G	GGACAGATGTTTGGCTACAAGT	GGCTGGGGATAAAACTAGCAAC		√	√
C24115S372	G/A	GGTGCACCCTGTTCGGGGAT	GCACCATGCGTGCCTTCTGG			√
C24131S141	C/T	CATGGGCAAATTTACAGTCCAT	GACAGACTCCCTCCATGAAGAA			√
C24348S716	A/G	AACCCTGTGACGTCAAATACTT	AGATGAGACGTCACTCTGTCGA			√
C24384S317	T/C	TCTATGTGGACAAAGACTCGGG	CCATGGCGAAGGGAGTGGGA			√
C24468S430	A/G	ATTTAATATCAGAGGCCAGCCT	ATGTGTGTCGCCGACGTCGAT			√
C24801S274	A/T	AGGCTACATTGGCAGTGTGAAC	GGAGGGGCGTATATCCTTTCTT			√
C24875S382	C/T	GAACGTCGCGCTGTCCATTTGA	AGATGAAACCCTTGACCAGCTG			√
C24933S108	A/G	GTGTACCATGTAAATACGGCAG	ATGCAATGGAGATTCGATCAGC			√
C25027S477	G/A	GTGGAACCACCAGTGCCGGT	TCTGGTGTAAGTTAGTTCCGGA			√
C25031S178	A/T	TCCCATGTCGCCAACACTAGC	TTACGCCAGTAACGGCACATAG			√
C25115S420	C/T	GCATGCGCCTTTACCGCGAC	GAATTCCAAGTAAAACAGGAAG			√
C25428S129	A/G	CCATTGGAATCCATAAGTGAATT	CTGTGGTTTTGATTTCCAGACT			√
C25509S207	A/T	GAGTTTATCCTTCATTATTATCTC	CCTCCATTTGTCGAAACTGACC			√
C25571S96	A/T	ATATCTACTTGCACATTTTACGT	TATTCCCAAGAAAGAAGTTGTC			√
C25620S318	A/G	GGCGCTCTCAAACCTCGGGA	TTACCACTTGTCGAGTTAATGG			√
C25700S394	T/C	CATACTTCTTCTTCAGCTGCTG	TCGGCTCATACTGGGCATAGTG			√
C25726S163	C/T	TTGGTGGTATGCCCGCCATCT	CCAATCAGGAGGGTTGGGTAC			√
C25747S759	A/G	GTTGTCATCGTAGTAGTCGTTT	CCAATTATCCAAATCTGTTGCA			√
C25773S203	G/A	GGTTCACATACAGTGCCGCTTC	CCCACACTAACGAATACCGTAA			√
C25879S510	G/C	ATGGCTACTAAGCAGAGTTGAT	AGGAGCTAGCCCAACAGGTGTT			√
C25923S76	A/G	AGGGGAAGGCGCTGAGAGCA	TTCTGTACTGGACCTGGAGTCG			√
C25959S486	C/T	CCTGACATCCAGGTACGACACA	CTCCTGCATTCCTCATCATCCT			√
C25973S55	C/T	GCCTCAATGGTGCACAAGTGAA	TCTTCGGCACGATGACGGGTT			√
C25979S461	A/G	TTTGGATCTTTGTTTCCTCAGC	AGTATTCTTTTCAAAAGTGTTGC			√
C26036S86	C/A	CCCTCAGGTCAAGTCTAGATGG	GTTTATCCTCAGTAGTAGTCCC			√
C26041S324	C/T	GATAACCACCACTCCAAAACCA	TCGTATCGTAGATACCGGTCCT			√
C26058S533	A/T	CTACAGGGAGCTCTAGCACC	CTACAGCACAAGGCTTTGCAGC			√
C26234S132	T/G	CTCAACCCTCCCATTTATGTTG	TGATGCTATGCTACGTAGCGAT			√
C26268S256	C/T	CAGCGAACAAAACATCTGATGT	CGATACAGTTTACGATCCTGGA			√
C26292S290	C/T	ACCTATAAACCTGGAGGTCA	GCATCTGAATTCCTCTTCCCAG			√
C26391S321	A/G	ATATACCATCTGTACCATCAGG	TGTCTCTATATCTCTTCATCAAC			√
C26424S321	A/G	TGGAGGAGAAGATTTCTTCTGT	AGAACACTAATGACTTGAGGGA			√
C26452S532	T/G	CCAGATCGGCCGATACAAAGCA	GGCCATTGAGTGCCACTCCA			√
C26459S307	T/C	ACACAGAAAATAACATACAGCC	AGCAGACACAGGTGTGATTACT			√
C26485S385	A/T	AGATGGGATTTCTATGGGGTGG	CTGCAACCACCTATGCCTTCTT			√
C26514S627	T/C	TTCAACAAGTAACAGTACTAAATA	CATGATCGCTGACAAATATAAG			√
C26519S1092	G/A	TTAAGAATTCGTAAAATGTAACAC	TTTGGTTACTCCCATACCCAGG			√
C26529S754	G/A	ACATTAAACAGACACCCGACGT	TTATTAAACAACATCAACAATTCC			√
C26792S417	T/C	TTCCCGTGCCTGGGATATTCC	GCATCATGGACGTAGGGCCT			√
C26930S286	G/A	GATTGTGGGCCATCATGATGGA	ACAGGGATGAGAAATCTAATGT			√
C26953S215	A/C	CTGAATCCAGATGCATTTAGATT	GGCTATTAAGACGATGATGAAC			√
C26981S533	T/C	CGAGGGAACCATTGATCAGATT	AAACCCCGATTATAACATCAGC			√
C27210S297	C/G	CTGGTAGAGCAAAGCTATCCAT	TCATGGTGTTTCCATCAACCTT			√
C27406S355	T/G	CACTCTCACCCTCCAGAACATC	AGAACTTGTATTCCTGATCACA			√
C27462S269	G/A	GACCCTGAACTTCCTGCGTTTT	CGCTCGTCCCTTCATTCTTCCT			√
C27493S417	G/T	TCAGCTTCATGCCGTTTATCTC	ATTTGAAGTATGGCAGTTCCCC			√
C27539S288	G/T	GGATGAATCACAGCTTTTACCT	AGAACCAGATTCAGGCTCACCT			√
C27920S341	T/A	TTACCAAACAGGGGATGCTGTC	GTCACTAGGGTGACCAGCTG			√
C28122S404	T/A	CAGAACTTATCGACGAGGTACG	GTGACATCCTCGGTGTGTCTTC			√
C28133S154	G/A	TCTTCCTGTCTTGACGACTCAT	ACCGACTAACACTGACTCCGTC			√
C28154S344	C/T	CCATTTTCTGCTGCTTCGTGTA	GTGCACCCTGCAGAGTTTCTG			√
C28186S231	A/C	ACACCAAGACAATACCTGATCA	AACGATTTCTGCATGTCGTGCA			√
C28201S398	C/A	TACAAGAATTGGTCGAAGCAGG	ACTCCACTGACGATTTGTTACA			√
C28205S131	A/C	TGGTGCGAGTGCGTACTGTGTT	GGTCCTGAAGTTTCTCCCGGA			√
C28301S667	G/A	GAAACCTGGTTATATGTTTAATG	ATTCTCAGTCCTCGCAAGCTTG			√
C28350S305	C/T	CAAGTCCTGATGTTCCTGGTCT	AGTCTTCATTCCGGCGCAATTC			√
C28367S588	T/C	AGTCTAGCACTCGAAGCTGTGG	TGTGTATCAGGTACAGTCTGTA			√
C28401S1387	C/T	TGGCCCTGTCTTTGGCAACC	CAATAATCAGCTTCTGTTGAGG			√
C28427S554	A/G	GTTTTCGTGTTCCGTCCGGTTC	TTATAGGATTCTTGACCGTGTT			√
C28580S94	A/G	CGACCTGTTATGAAGCAGGAGC	CGACACGACACACTGCTGAC			√
C28674S156	T/C	GCTGGAAGGCGGGAAATTGTTA	AAAGTCGCCAGGCTGATGTGAC			√
C28683S535	T/C	TGCTTTTGTATCTGTTGTTGTTT	TTTGCTTTGGTTTAACTCTGTAT			√
C28713S843	G/A	CAGCTCAGATTCCTTCCTCTTG	CAGCTGTTCCTTGAGCTCCTCT			√
C28787S595	C/A	TTGTCAGCCAATTGCTCAGC	TATCAGAGTATCCTACAGTCGC			√
C28875S359	T/A	CCTGAGTTTGCATCAGCGTGAC	TCATCACTTCGGTCATGCTCCT			√
C28986S276	A/C	TTGTCTACTGCTTCGTCAGTCA	TCCGGAACCAGGTGATCGCG			√
C29034S1118	C/A	TCCGCCTCCGCTACCGTAGT	CCCTTGTCTGTGTGGTCCCT			√
C29104S279	A/G	GGTTCACGAATCCTGTTTAAAA	TGATGATCAAGACCTCATTCTA			√
C29284S810	A/G	GACCCATTTCTTTAGTCTTCTA	AAAAGGAACTCTTTTAAAAGCTG			√
C29314S305	G/A	ATACAGCAAACGAGAGAAGTCC	CAGAAAACGCTAACAGTGTCCC			√
C29325S330	T/C	GTGACGGTGTCATGAAGAAACC	ACCTATCTGACAACAACATCTG			√
C29343S312	C/T	TTTGTCCAGTTTCTCTATGAAG	AACTGCTGCAGAATCTGTGACG			√
C29516S83	G/A	ATGTCATCTTGTCAAAGTGAAAA	ATGTCAACATCTTGTAAAGGTC			√
C29556S146	A/G	CCATCTATCTGTGATAACGGTG	GATGACGATGAGGAGGAAGAAG			√
C29604S326	C/A	GAAGTCGTTGTCTAGAGAACCT	CGTCCATAGCAACCCTACAGTC			√
C29610S500	G/T	CTGTCACGTAGCGTTTGGTTAA	GTATCATCACAGGGGTTAAGAA			√
C29643S429	G/T	ATTCACTAAAGCAATGCAACTG	TGATATTATTGGATTCCTTAATGA			√
C29697S72	G/C	CCTTTGTCGTCTGTGGTGCCAT	TTGTGTTGCCAACGACTACAAC			√
C29699S463	C/T	TCTCACTTCCTGAGTTCTGGTC	TGGTGGACACAAGATTCATATC			√
C29759S259	T/C	TGTCTGGCAGGTAAAGAGTTGG	ATTTGACACCACAGCCCACTTT			√
C29771S183	C/T	AATGGTGGCTTTGAGTTGGTGG	GACAATGGCAGTGGGTTTAAGG			√
C29785S202	G/A	TGGATCTGTTGTTCCGAACACA	CTTGCTATGTCGACAATCTTCT			√
C29821S522	T/C	AACTGTCTACCACCATATCTAC	TACCAGTCACTCTGCTCTGCTG			√
C29925S432	G/A	TGAGATCAGCGGCTTTCTCTGC	TGAACGTAGGTGCCATAGTGTT			√
C30128S482	A/T	ACCAGAGTCGTGAAATCCTCAA	ATCAGGGATTATCGGTGACCAT			√
C30142S300	T/C	AGTAGCATTGTACCGATCCTTC	CACTGGTTTGTTGTCGTTGTAG			√
C30219S560	G/A	TGACAGGAGCAGACCGTATAAA	ATACAGTTGGTGCTGGTGAAAT			√
C30224S673	T/A	CCATGTCCTTGACAAACACCTC	CCATCAGAGTGTTACACAGATT			√
C30225S358	C/T	TCATGCAGTGAGGTATTCCTAG	GTTCCACTTTCTTCACTTCCTC			√
C30244S72	T/A	CAGACTTCGATTCCGAACGACT	AAACATCCGATGACGGCAGGCA			√
C30290S187	G/A	GTTTCCAGAACCCATTTAGGGC	TGAGGGACATGGCCACAGAAAT			√
C30299S598	C/T	GAAGTCTCTCCTCAAACACCGG	TAGTCCCATCAGATGTGGGTCC			√
C30341S254	C/T	GCTGGAGTATCTCTGTGTTTCC	CCAGTCCCTCCAGGAAGTGA			√
C30391S976	G/T	GACTGATTCGATTCCTAAGACT	CTTTAATGGTTTCTGGTACAGG			√
C30426S483	T/C	CCTTCATATCGTTAGCGTGTTC	CCTTCATCTGTTTCGTTACGAG			√
C30530S462	A/T	TTATGCAACATAATCCATACGC	AAATGCAGCAATGACTAGGCGG			√
C30697S75	C/T	GTTGTGGTCAAACTACGGAATT	CATGAATGACAGGGAGGACCTC			√
C30743S117	C/T	GGGATCGGACAGTGGAATCCTA	CTGTTCTACAGAAAACCATGGA			√
C30768S101	T/C	TTTATCTTACTCCAACCGATGC	TGAATCTCATGTGTTCATAAGTC			√
C30784S556	A/T	ATCATGCATCAGGAAATCATCC	AGTGGTACAACCACACCTCTGG			√
C30800S59	T/C	TGTGGTGGGTCTTGGAGGGC	CTGTGTAGTACTAGACCAGAGT			√
C30822S266	C/T	AAGGAGTAGCGGTAATAGCAGA	TTGAGAGCATGAACATGTGATG			√
C30892S398	C/A	TGAAGGCAAGTGAAATGTGCCA	GGTGACCTAGAGTTAAGTCTGT			√
C30899S346	G/A	TATAACAGCATTACTGACACTC	TAGTGCGTATCCAACAGACTTT			√
C31049S127	A/G	ACTTAGAGCCGAATTTGTGTAA	CGTTAAACTTGGCCAAGTTCCC			√
C31078S259	G/C	ATATCTCCTCTAGAAGCTGTAT	AGTCTGGGTCTTCGTCCGTGAT			√
C31100S504	A/G	TCTACGTAGAGATGGCATTCTT	GTGGTGGAGACAACAGGGTGA			√
C31135S153	T/G	AATAGAATAGTACTTGCACCAG	TCAGTTACTGCCCAATTGAATC			√
C31184S771	G/A	GTAAAGCCTGTGGAAACTGTTT	TTCTGTACAGATCAACAGCTGT			√
C31206S275	A/G	GGATAACTCCAACAAATCTAGA	AGTGACTGTAAACTGTTATACC			√
C31212S458	T/G	ATTTTGCTGCTTCCTCTCCCAA	GTTCATATGCCGTGAATCTCAC			√
C31264S526	A/G	TCCGTCTGATCAGAGTAGGGAA	TTTGTACTGCCTTTGATGTAAC			√
C31287S442	G/A	ATAAGGCCACAGTGGAGACTGT	AACCCAAATCAGGATTGCCAGG			√
C31548S614	C/T	TCGAAAATGAGAATATTTTCAGG	TATCCCTGTGGACGAGATCGTT			√
C31597S360	C/T	TCAAAGAAATCAACGAGACACT	GTTTTCGGACAAATAACCCAAG			√
C31616S197	A/G	TCCATCCTCCCCAGCGATAGTT	CTGGCGTTCTATCCAAGACAGC			√
C31627S378	C/T	AGCTGACTCCATTACACAAAAC	TATTCAGCTACGATAATCGCCT			√
C31762S298	T/C	GTCCGCTCCTCGGAACAGTC	GTATCCCAGATATCTCTATGGT			√
C31855S236	C/A	CCTCCTCTTCCTCCAGTATAAA	TGAAGACATCTTCGCTCTTTTG			√
C31942S317	A/G	GTGAATGCGGACCCACTCTC	TGCCAGTGTCTGTCGTCAAACT			√
C31986S570	A/C	GAGAAGATGGGTGGAGGCGA	CGTTACGTGTGTACACTGCCAT			√
C32010S970	C/T	GCGTTAACGGTACGAAACTATA	TACTCCACTGAAAATGACCTCT			√
C32135S365	T/C	CAAACTTGGCAACTGCTTCCTC	CTTTCCGGACCTGCTCTTCATG			√
C32144S474	C/T	CTCGGTGACTATTTTCTATACT	CTGCACAGTACCGTACCACAG			√
C32277S195	A/G	TGATCAGTACAGAGGTCATCCC	TCTTCAACTCACCCTTCTTACC			√
C32279S248	C/A	TAACCGGAAGTCACTTTGGAGT	GACAGAAGTACTACACTTTCTG			√
C32327S387	A/G	TCTGCATGTCATCGTCCACATC	GATTCACGACACGAGGATGGG			√
C32366S332	A/T	CGATACGTTATTCTGAAGCCGC	TCTGTAGCGAAGTCACTAACGA			√
C32484S96	C/A	TCCTCATCCGACATAACACACG	CATTTCCATCCACCAGCCCTGT			√
C32570S249	T/A	AGGTCAAACCAGGTTGAGCCGT	ATTCGTACAATTCCTTCATTTGC			√
C32778S586	G/A	GAAGTAGACCCATATCTACCGG	ATCCCATGTCGCGTGCAATCAC			√
C32825S246	A/G	CATGACCATTTTGTTTGGAGCC	AGTCCCCGTAGGCTACCATTAT			√
C32914S465	A/G	CTTGTGGATATGGATGGACAGG	ACTGTTCTCAAGAGGACTTCTG			√
C32918S381	A/G	GAGGACCGCTGCTACTCGGA	TATCTCAGGAACAGTTTCAGAC			√
C33217S130	T/C	CTTGCTTCTCTGCTATCAGTTT	TCACATCATCTGATTGGACCTG			√
C33346S381	A/C	GAAGGTCGTATTGATCTTTGGA	ACGCTGGACATCCTTCTGATGC			√
C33438S322	A/T	CAAATAGAACAGTGACAGCACT	CAAGGTTCTGCACATCTCCATA			√
C33452S1517	A/G	AAGTTTGTGCCACGTGACTGTG	ACATAGTTTGGGCCCGATGACT			√
C33553S173	A/G	AGAATTTCCATCTCGTTCTGTA	TTAATCTTCTCCTTCATCTCCG			√
C33631S782	C/A	GGGTAAAACTTTCTAGGATAGTA	ATGACACATACCATTTGGACGT			√
C33634S141	A/T	AACGAATATCACGTAGAATCCG	TTGGAGGACAAGTGGAAGGTTT			√
C33670S673	A/G	GAAGTGTGGTATAGTTAGAATG	TACCAAAGCTGCATCCTGACCC			√
C33698S468	G/A	ATTCTACGACGTTTCGGTGCTT	TCCTCTGTAGCTCGACTTCTCG			√
C33707S88	G/T	AGCCATCAATCGACGTTTTCTG	TCGGAGATTTGGCGCAGTTACT			√
C33935S1092	C/T	CCCTGTATCTGTGATAGTGAAG	ATCAGGCAGTTGATAGTTCATG			√
C34009S333	A/G	CCACTTTTGTGACAGCAGAGGG	ATGTCCAGGATGTGCCACACAC			√
C34015S901	T/A	CTCCCTGCTTCTGCTGCACG	CTATACCAGGGTCACAGGCC			√
C34096S687	G/A	CAGCTCATCTGACACAGGCAC	TAGGATCAAAAGTGCTAGGCTG			√
C34124S230	G/A	AACAATGGATCTCACACCTCGG	TTCTCCGTGATTCGTCTAAAGA			√
C34157S376	G/A	CATAAAGACCAAAACCAGCAAT	TTCTCTGATCAACAGCAAACTG			√
C34159S494	G/T	GACAGAGCAGTTGATAGATTCC	CACAACAGGTATGATTTCTTTAC			√
C34208S204	C/T	CACGTCTTCACTACTTAATGAC	ACACACCCCTAACCACAAACTC			√
C34252S644	T/C	TTGTTCATGCTGTTTCCCGTGC	TAGGCAGGGAATTATTCTGGCA			√
C34305S164	A/T	TATGCAGCAGAAAGTAACAACA	GTTTTGGAGTTTCTCCTCCAAA			√
C34362S359	C/G	ATGCCATCTGTGGAGTTACACC	CTGTAGCAGAGTTGACAGAGGC			√
C34513S308	C/T	ATGACCTGGTAGATGTAGGAGT	AAACAGTGGTCAGAAATGCCAT			√
C34527S367	T/C	TATCAGTGGTGGTTATTGTCTC	TGGTCATCTGGTTTGTAGAAGA			√
C34572S150	C/T	GCTGTAACTTGGGCAATTTCCC	CTTGACCCTGGTCATATGACCC			√
C34688S188	C/T	AGACCTGCTAGTTTGTAGTCGA	ATCCATACAGGGTCCACAACTA			√
C34701S293	C/G	TCATCTCGACACCACACCTGCT	CCATGCTTCCTCGACATGCACA			√
C34716S229	C/T	CTCTAAATCACAACCATTCTGT	CGCAGTTTTATGGTGGATACGG			√
C34758S911	C/A	CGACTAAGAGAAGGTCAGACTC	CCTCCTTAAGGTCAAGGCGTTG			√
C34919S403	A/T	TATCTCTCACTCTCAAATCTCT	TGATGACCTTCACCAGAAGGAG			√
C34942S102	C/T	TGTATTCTATCTGCTTCAATGC	CGAGTCCTCCATTCAAGCTCTG			√
C35012S1133	G/A	ATACGAACCATTACAGCCACAC	TTCCAACCTGTCACATCTCTCC			√
C35054S74	C/T	AGCTTCCGTTTGTTATTGTCTA	GTATCCACAGTTACACGGATCT			√
C35292S128	A/G	CTTTCAGACATCTCTTCACTAC	ACTTGGGAACTTATCCAAACGA			√
C35321S483	C/A	GTAGACATGGACTCATTGACAC	AATAGATTGTTTCCATGTTTTGG			√
C35352S321	T/C	CCCTGTGACAGTAGTTGTAAT	CCTTGAGTCAGGGTTGCTCC			√
C35381S271	T/C	CACAATCCTGACAGTGGACAAC	TCTTGTCTTGTTCAGTCACAAA			√
C35403S690	A/T	ATGAACGAATATCAACAGCAAC	TCTTACTTTCTCACGAGGGCAG			√
C35647S818	T/G	CAATACCACAAGCAAACACCTC	TGTAAAACAGTCGGGTAGGTGA			√
C35668S302	A/G	GATGTTTCCGCTCTGCTTCCTC	GACTCTCTAGTTCTAGTCTTTG			√
C35707S74	G/T	TTTCTGTCATGGTAACATCAGC	CAACATTTTCTGTGATGTCTTC			√
C35822S797	C/A	TCCAGTATTTGCAGTGATGACT	TTGACCGTTTAAGTTGGTTGTC			√
C35900S198	C/T	GCTTTGTGTGTTCTACTTCTTT	GTTCTTCCCTCTTCTTCTGTAG			√
C35908S245	C/A	TATGGATCTGCTGCTGTATCTT	TGCCAGCCTCCATTTCAATAAA			√
C36011S287	C/T	CACTTGTTCCAGATTTTCTCCC	CCCTTGCGATTTGATATCAGCC			√
C36087S252	G/A	ACATTATGTTTCATCTCAAAGTAC	GTACTTAGACCAAATCGTAGAG			√
C36105S330	C/T	TTCAATAACCTTATACACACGG	AAAGATACAGATATTGTTGAGCA			√
C36115S315	T/C	CCTTGATGCGGACCAACTTTAC	TGTGTAACGTGTCAGAGGTCCT			√
C36197S181	C/T	CTACTTTGACTGGGTTGATGGG	TCAGAATTGAAAATGATAAACAGA			√
C36279S277	A/G	GAGCGTCCTCATAAGTGTCCC	CTTTGGTGGAAATAATTCCATC			√
C36370S219	C/G	AACACAATTATGATTCTTCAATTG	TCTTTGAGTAGTACTCTTTGTTC			√
C36390S435	T/A	TCGTAGACTCTGTTCTTGATGT	GAAAAGAAGCAGAGAGCTGTGA			√
C36475S460	T/G	TATATTTGCTGCAGGAGTGGGT	ATTAACGTGTGAAAATTTACAGTT			√
C36531S161	A/G	AAGAGTTTAACACAGAGTACGA	ACAGAGGACTACACATGAATGT			√
C36549S274	T/C	GACGTCGAAGCATTGCCTGTTC	GACATCTGTTGATTTTATGAGC			√
C36642S494	T/C	AATTGGTTCGGAGAAACAAGTA	TAAACTGCTGGCCTTCGACACC			√
C36657S79	C/T	AGTCAATGAGACCTGTGTAGAC	GGCCTTTACGGGCCTGAACC			√
C36826S426	C/T	AGTAACACTAGTCCCACTTTGA	GCTGTCGTCGAACCAAATGGC			√
C36937S329	C/A	TGTTTCCACAGACAGCAATATC	GGTTTCCGTCATTTCCTTGGCC			√
C36938S675	T/C	TCGCGCTTCACCGACTTGGC	TTATTAGATAAGTCATGCTCCAG			√
C36970S501	A/G	GATTTGGACCTAATTCTAAGCC	AATGTCAGCATTGCCATGCCAA			√
C36992S267	A/G	CAGACGACATCTTTGAGATATC	TGTTTCTACTCATCGCACGGAT			√
C37032S257	G/A	TTCCACTGAAGAGGATGCAGAA	TCAACACAATCATACCAAATGAC			√
C37092S138	A/G	TCACACTGAATGTAGTGATGCC	CCTAGCACAGGGAAGTACAGTT			√
C37392S686	C/T	AACCAATGGCCAAAGTCCACTT	CGAAGGAGAGGTCACCTTCAAG			√
C37426S387	A/G	AGTGAACACTGACAACAAACCA	CCACTTCTGGGTAGTTAGCTGT			√
C37562S609	C/T	CGTAATCCATCGCCAAGATCGG	AGGTCGTTTAAAACCTTGTTAAC			√
C37798S1151	G/A	AATGTCTATGTATTTGTGATTGAA	TTGCTTGTCCCTCTAGACTGTC			√
C37810S1717	A/T	TGACGTAGTCAGGTATAGACGT	GTCCAGACTGAGCTGGATCATC			√
C37892S253	C/A	CACCAACTAGTTTCTCCTCCTC	TCTGAGTTACACTACTCCTACA			√
C37984S520	G/A	TATCATCAAAGTGTTCGTTGTC	TACCGAGCAGACCTGCCACC			√
C38063S304	A/T	TACAGTTCACTGGATGTCTTTT	TTGACATCCCATCCTCGTCGC			√
C38064S58	G/T	GACCGAGCTAACGATACACACT	TCCGAGCTCTCCCACGTGGT			√
C38102S455	C/A	TCCTTGATGAAGAGCGCGATCG	TAATGTCAACCTCCCCACATGA			√
C38121S479	A/C	ACACTACCAGACCAGTGAAACG	CAGCTTTGGTCAAAAGGGTCAC			√
C38177S543	T/C	CGTTCAATCCACCCATCTCATT	ATTCTAGCCCAGAACTTTGCTC			√
C38179S433	T/C	CTTTAACTTGACACACATCTTC	TCACTGGACAGACTTCCTCTCT			√
C38258S229	T/A	TGGGCATAAGTTCCTCTACTAT	TAAAGTCTGACTTCTCGGCACA			√
C38401S580	G/C	ATTCTTCACCCCAGACAACGTC	AGCCAATGACCTTGTCAATGTC			√
C38712S263	A/C	TCAACCCCACAGACTTGCTACG	TATCATCTAATGACAAGTGTCTA			√
C38918S318	C/G	CTGTTGTAAACCAATCAGAATC	TATATCCCGCGCGACCAATTTT			√
C39001S709	C/T	CGATATACGTACAGTGTACAATA	TAGATGACAAGATGTGGTGAAG			√
C39381S246	G/T	GCGCCACTATTCAGTGTTACAA	ACGCAGGGGACACAACTCACT			√
C39406S421	C/T	CTGCAGCCTTTGAGTTGTACTT	GCAACGACATTCCGTCAGTATA			√
C39511S377	T/C	CTGGCTTCACTGTGTATGGCAA	CATAACCTGCAGGTACTGCTGG			√
C39539S1182	T/A	CGGAAATGCCACCTTTGACAGC	GTATGATGCAGGATTCAACTGT			√
C39542S381	C/T	GAATTCCCCTACAGGTAGCATC	TTGTCCACTACCTGTATGATGG			√
C39595S390	T/A	ACGGAAGAATGTTTCGAAACAG	GCATTTGACAGTATTTCCCGCC			√
C39617S557	G/A	TATTGGGTAATGTCTGAGAGAC	TGGACAGCGTATTGTTGGAGAC			√
C39726S490	T/C	CCTCGAGATTCTGTAGAAACCT	TGATGTTAGGGAAGCTCTGATG			√
C39782S717	G/A	TACTCGCTGACATCACAGTGTA	CTGTATCCGCTACTCTTTGAAC			√
C39948S288	C/T	AAGACCATGTCTTAGCACTACA	GGACAACAGGTACTTGCTGACC			√
C39984S302	G/A	TCCCTCCGAAGCCGTATTGTGA	ATGACCACTTCAATAGTTTCTC			√
C40047S102	G/A	GGCGAGAAGTCACAGACGCAAA	AAGACAGGTTAGGGTATCTGTT			√
C40048S317	C/T	TGCTTGGAAGGATTGTATTTGC	TGCGTGGATCAAGCTTAGACTG			√
C40293S355	T/C	ACTGTATCAGCGACATTTCGTC	CTTTCACTTGATATAAAACGTTTA			√
C40319S288	C/T	GTTGTATACAACGTTGTGTTCTT	TCACTCCAATATATCACATTAAAC			√
C40348S482	G/A	AGTTACATGGTCTAAACATCAG	CCTGTGAGATATGTGGAAACTT			√
C40524S291	A/T	GGAGGGTTTGCCCTCGGGTA	GGAAAGGCATGTTATAAACTGA			√
C40606S787	T/A	CACCTTTCAGGGTATATGAAGT	GCACTTGGCTACGTCTTCGGTA			√
C40613S349	G/A	CTTGAGACTCCTCTCTCTTTGA	AATCACTGTCGTCATAGCACTT			√
C40655S388	C/A	TGTCCACATTTCCACTGACACT	TGCCAACTGCCTTGGTCTGG			√
C40676S476	A/G	TTAAAACTAATGTCAAGCTCAAG	TTCGGTTCTGTTTTAATGCCGC			√
C40717S205	G/A	CAGTAATGAATGGCAGTGTGAC	CCTCCTACTTGCTGTATTTGGG			√
C41012S572	G/A	CCTCCTCGCCGTTCTGTTTAAT	CCTCTATAGCCTTACGCTCTAC			√
C41032S375	A/G	CATTAGACAGTGAGCTACACTT	CATCGACACGTTTGTATGTCAT			√
C41047S558	G/A	ACTGTCGAGACGACTGGCAATG	GACAGACGTTAACTGCCGACAT			√
C41226S214	G/A	AAGGGACTGACAGAGAAGGGC	TCCACTTATTAAATATGCCTACA			√
C41271S255	T/G	CTAACAGTGACTGGAGGATTGG	CGAAGGATCCTGTCTTTCCCGA			√
C41298S426	T/C	CACACACACTGGCCAATACCTC	CGTGGGACTTGAGCAGACTCA			√
C41527S213	T/A	TAAATCTGTGTCGGGAACAGGG	AGTAGTTGCATCTTCATTAGGG			√
C41662S217	G/A	GTGGCCTTAGCATGGTCCCG	GCTTCGTGTACGCTTTAGAAAT			√
C41666S803	G/A	AAAGACAGGCCCATGATCCCCT	GGAGACATCACAGACATCCCAC			√
C41686S468	A/G	TGAGTGGAGGTCAGAAACAGAG	CCATTGCTCGTGCCTTGGTCA			√
C41740S1410	C/T	GTGTGCTTGGGAAATCAACACA	ACACCTTCTGACTGTACCGGC			√
C41759S240	G/A	TAACGAGAATGTTTCCGACTGT	TGACCATTAGAACGGCCACAGA			√
C41820S437	A/G	CGCAGCATATTGTCAAGGTCAT	TCACGGTAACGGGCAAGAGG			√
C42094S149	A/G	CAGACTTGTGCGCTGGTATTAC	ATCAACTAAGTCATGTAACACG			√
C42162S181	G/A	GTGAGAAGGCCTGTATAAGTTC	CCCACTCCACGCGATCAGGA			√
C42376S310	C/T	TGCAGGCATCACAGTTGGGC	AATGGTCACTTGCTTCACGATT			√
C42534S423	T/C	AGGTCGTAGCAGTAGTTGGACA	CTCATCTTCTGATGGTTTCTGT			√
C42612S133	G/A	CTGCACCATCTACATAGCACCA	ACACCATTCCACTGATGTGACT			√
C42637S111	A/T	TGTCCCCATAGATCGAAGTCCG	TGCTTAAATGCAAGATGCCAGG			√
C42653S288	G/A	CCTTTGTGAAGGTAAATCCCGC	TTGGCATCAGAAGATCTTCGTG			√
C42659S254	C/T	GACCAGCCAGTTGTATCCAAGC	TCCTGTTCTTTAGCAGGGCATC			√
C42827S404	A/G	ATCTTGTTGCAGCTAACAGGGT	TATTTGATGCTTCATGGAATCC			√
C42973S181	T/C	TGGTCTCTTCCATGATCGGCAG	CCGACTTCCCCATAGTACCCA			√
C42998S229	C/T	GGTATTCCTCATCAGGTTTCAG	TTTCCTCGCCGGTTTTGTATAT			√
C43019S470	G/A	AGTCAGCGAACCAAGTGTGAAG	CTTTAAAGGTCGTACCTAGCCG			√
C43109S299	A/G	CAGGACGTTGCAGCATATCAAC	ACGGCACTTCCTGACACATCCA			√
C43146S114	T/C	GTAAATTCATTTGGAATTACGAAT	GAGACAGTTGCAGTTAAGACAT			√
C43162S408	T/C	ACCCAGACTTGAGAAGGCTCCT	ATTATGGGTTTGAAGGACATCC			√
C43196S183	G/A	ATGACGAAGGTCAAGGACCAGC	ACTCTCCCGATAAGGTCATGGC			√
C43632S275	T/C	CCAAGTTTGATATTCAGGACTG	GGCAAGGTACCAGGAACAAA			√
C43739S333	G/C	AGCGTTCGAGATTTAGATGTTC	CGGCACTGTTTACCTTATCGTA			√
C43954S563	T/A	CCCTGTACCAGTTGTCTGAGAT	AACACTCCGCTACCAAGATAGC			√
C44014S674	G/A	CCAAATATAACCACGTTAACATC	TCAGGTTCCAAATCCGTAATGT			√
C44115S528	A/G	TTTCCAAGAACTATGACCTTGA	GGGAGCGGAACTCCTTATTCTC			√
C44156S725	C/T	TTAGCAAGGAAACCTATCAACT	CAAATATGTCCAGTTCATTATGC			√
C44557S299	C/G	ATCCTGGCCAGGTCCAGAAG	GCCCGTACTGATAGTAAGCATC			√
C44627S710	C/T	CCATTGAACCTGATGAGTTCAG	TGTAATCCAATGGGACAGCACC			√
C44679S137	T/G	TATCCTGATAAACTATCACCTG	TCCCATCCTCTAACACCTCAG			√
C44751S790	T/A	GTCTGTTCAAGAATCCAAATCTT	AGACACACGACCCCGACTTCAT			√
C44761S227	A/G	TTATGCCCGTCCTGACAGTATA	TAGAGTACACAAGAAGCTGCCT			√
C44855S365	G/A	AGGCTACATCGTACAGCTGGTT	TGAGGTCCTCCACATACATAGC			√
C44869S41	G/T	CCGTGGTCATGATAAACGACGT	AGAAGATAGATGCCCAAAGACC			√
C44912S317	T/A	TGCTGGCGGAGAGGACACATTT	TGCTATCACAAGCTTGACTAAC			√
C44933S445	G/A	TGCCGATAAGTCCTTCACTTGC	CCCCTCCAACTGATGTTCGAC			√
C45004S510	C/G	TTGCTAGCTGGTCGTTAGTGAC	TCAAACTAATTGGTTTCTTGTTTA			√
C45641S348	G/A	CAAATAGCGGTTCTTTACTGCT	ATTCAGAAAATGAGCAATTATATG			√
C45683S273	A/T	TTGTTGAAGATGAGTACACCGC	GAGATGTCTTATTTGAGCTCAT			√
C46002S172	G/T	ACTTTCTGAACAGTTTGAGGAT	ACTTTCACTACAATCATCAGATT			√
C46416S141	A/G	CGCTCTCCAACGAGGTAGGT	TCCTCATGTAGTTGTTTAACAC			√
C46633S294	T/C	CAGAAGTACAAGTCATATTGGC	TCTGCCTCAGGAGTTCCTGTC			√
C46866S138	T/C	TTCATCCCCTGTAGTCATTTCA	ACTGTGAGCAGGCAGTTCAGG			√
C47021S446	A/G	TTCGCTAAATCCCACTGGAACC	ATGTACGTCACCAAATCCACTC			√
C47045S426	T/A	TTAGTTGGTAGGCTACCTGTAA	GTACTAGTGTATTCAGCTTCAG			√
C47165S516	T/C	CATTCTCGGGCCGACACGTA	CCCCACGGTCGGCAATACGA			√
C47364S497	G/A	TTCCCTGTGACATCATCAGCTG	CCTGAGCATGAACCCGTACTTT			√
C47442S1617	A/G	ATGGCAGTGCCGAATTCATTTA	TGGCAACTGTATTCACCTTCGT			√
C47516S157	A/G	ATGTGGCTCCACAAGTGTATTC	ACCAGGACGAGCGAGGAAACA			√
C47562S784	C/T	TCCTCCGGTTGGTCATTCAGCA	ACATCTCTATTGCCTTGAGCTC			√
C47580S126	C/A	GTCTAGCTATTCGTCGTATATA	TGACAGATCGACGTAAGAAGTA			√
C47750S455	G/A	CTTGGGGTTGAGTTTGGTGATA	TGCATCTGGGTAGAAGTTGTGG			√
C48040S295	G/A	CACAAGAACTGCTTTGTTTTGA	ACGAAATAGTCGACTCAAAAGT			√
C48149S312	T/C	TATAAAACTACTTTTAAGGTATCC	AGTCTATGTTGTTGTGATGGAA			√
C48416S341	G/A	GGTGTTTTGTAGCCACTATGTA	TTCAACAGGCGCACTTTCATCT			√
C48628S361	G/A	CTGCTACTTCTCGTAACTCCAC	TGTCATGACGAAGGTTCAACAG			√
C48775S180	A/G	ACTTCAAGTTCAAGAACAGTCT	ATGACTCTGTTACCTTTGATGG			√
C48971S115	A/G	TTTTCGCCTCATACTTCTCCAG	CCAGTGACTGCACTTCTTGTCT			√
C48991S208	A/G	TTTCCAAAATAAGGGACGCCCT	GATCAACTTTGGAAGCTGTTCC			√
C49010S592	C/T	CCAGGATGTCTGCCTTTTCTGG	GCCACTGACGCATATCACACGA			√
C49051S488	A/G	TATCCGTCAGATGTCCATAGAG	AGTCCTCCGGACAGGCAGCA			√
C49060S85	C/T	AAACACCCACACAGAGGATTCG	TCACCCATGCTGAATTTGTGAT			√
C49199S271	T/C	CTGTGGCACCCTCCTGTTCTAT	CTGCGCCCTCCTTGTCAGCA			√
C49390S534	G/A	TTAAAACACAATCTAGCTATTAAG	CTCCCATGAAGCTGGAATCATG			√
C49674S211	G/A	GGGGATACATGCTCTTATTGCA	TCAAGGTCTATTTCAACGGGTC			√
C49676S213	G/A	GCTTTGCTGATATAAGACTGGT	ATTCATTCTGTAACAACTGGTG			√
C49722S251	A/G	GGCTTTATATCAGATTGTATCTT	GTGCAAACTGCACGTCGTAGTT			√
C49739S111	T/G	GAACCGAACACGTGACAATCAA	TGACGCGTGTCAATGCATGTTC			√
C49828S583	T/G	AGCAGATGCTTTCAGTCAACAC	GTCCAATATCACTAACTAAGGC			√
C49829S586	C/T	CCACTAGATTTTGTTCTGATAG	TCAGAGTCTTGTTGGCCTTGAA			√
C49997S213	G/A	CCACTATGTTTCTGACCTCTTC	TGATTTGTGCAGTTTCTTCACC			√
C50092S301	C/T	AGGAAAAGTCTCGTCTGGAGGA	TGTACGACAGCCCAAGCAAGCT			√
C50119S55	T/C	TCACTGATGAACTGTGTACGTA	GTGAGCCTTTTATATAGAACGA			√
C50346S359	G/A	GCGTGCCTTGTGACTGACTACT	ACTGAGAGCGAGGAGTGCTG			√
C50351S304	G/A	TTTGCTCATCTTGGGTTTTCAT	GGATCTCCTGTGTCATATTCTC			√
C50454S368	G/T	GTCACGTGGCCCGATTTTGTAC	GATAAGGTTGTTTATTTGTAAAGA			√
C50519S341	A/C	GTAAACCTGGGAAGTACAATAT	AGGGCAGAAATATCGTCTCTAT			√
C96S230	C/T	CACTTCCAAACCTTGCTAGAGC	TAGCCATGTCTGTTTGTACACC			√
C195S432	A/G	AGGAAAGGGTCAGAATCTCAGA	ACGCAAGCTAAGTGTAGTTGTG			√
C667S315	A/T	TTCCTTTACGCATCCTTACCTG	ATGTCCCGAGCCGTCCCAGT			√
C731S141	T/C	AATTGGATTTCCTGCCTTGTGA	CCCTCGTTGATATGTCCAAGGA			√
C1026S458	A/G	TGGAAGTGTTCAGGCGCATGG	GGCTGTCGGTAATCCTTTGTGA			√
C1196S296	T/A	GAACATCATTCAACTGTTCACG	TGGCCCATGTGATTTTATTTTC			√
C1620S128	A/T	ACGCCAGTCCAGTCAGGAAATC	CGTACGAAAAGCTGGATGTCAG			√
C1684S1037	T/C	CTGTAGCAAAGTTTGTGGACTC	AATTAAAGCCATGGTTGTAACC			√
C1760S705	C/T	CCGTGGTGAGACTTTGTATTAT	TGGTATCTTGTATAGTCATTCC			√
C1963S176	T/C	TACTTGGTGCTCCATTGTATTT	TCCTGCCAGCTACTGGTGAACT			√
C2038S219	T/C	ATTCGGCTGACTTGGTACTCGC	GTGCTTAAGAGTTCTAAAGACA			√
C2421S676	C/A	ACTGCCCAGGTCTGATGATAAC	CTGTTCATCCACCTGGTAGATA			√
C3261S857	C/T	TTCTGCCTGCTGTTGTACACTA	ACTAGCCTCGTTGGTTTGTTCA			√
C3343S154	A/G	ATTAAACAAGTCCTAACTCTGC	ATCTTTATCAAACACTCTGGTG			√
C4141S690	A/G	ACAGAGCTCTGATATTGTTAGG	GTTTCAGCGCCTGAGCAAAATA			√
C4283S216	A/G	TCTCTACCAGGAATAAGAGGTA	AGCCACTTTTGTATAGCACTAA			√
C4303S40	T/G	CTCATAATGCTGTATGAGGTTG	GTGGCGTGGAATACCAGAGG			√
C4332S486	G/C	TATCAAAACAATTTCACAAAACAC	TGTAGTTGATCCGAAAAGTGTA			√
C5024S157	G/A	CGTCTACTCTCCTCGCCCTC	ACAGCGCCCTTGGGCTGTCT			√
C5172S360	A/G	TTGACTGTGACACTGTCAACTG	TGCTCCGTGTCACCTGTGCAT			√
C5824S191	A/G	AATTATGTTAAAGCTCTTTATAGC	AATGTGTTGTTCTTAATTACTTGT			√
C5828S356	C/T	GAATCCAACTACGTATGGTGAC	TATGTATCTACAGATAATGGGTA			√
C6185S373	C/T	CACATATCATCTAAACCTTGCT	CCCTTGATCACCTGACCAATGC			√
C6273S355	C/T	CATGATTGGCATCATCGTAGCC	TATACGCGTGTACGTTGACCTT			√
C6541S118	G/A	TGGCCTTTTCAAAGGTGAATCG	GGGGCAATAGTGTACCCTCATT			√
C6628S395	T/C	ACTCTGTACATAGCATGATCGC	ACTGACAGAAGGTCACTCCAAC			√
C7061S280	C/T	GGACGACAATGGCATGTGTGGT	AGACTGCAATACCAATGGTCTC			√
C7185S129	T/C	TAGCTGGGGCACTCTTACGAG	TTGGTGGCCAGCTGTTTACGTG			√
C7195S172	T/C	CTTGCGAGTGCTGTTCTCGGAT	GTGGCGCCCTCTCTTGACGA			√
C7221S353	T/G	AATAGCCAAGGCATCTTCCGCA	CCGGGTAATCCCATACATTGGG			√
C7642S249	C/T	GTTAGAGTCTAATTTATCACCAA	TAGCAAACACTTTGTCCACTGT			√
C7714S74	A/G	TGGAGAAGGCAAACTAGCACCA	GTCGGTATACCTAGCTTCATGT			√
C7721S516	A/G	AGGCATAGAATTGTCTGTAGGC	CTGTATTGTTTGTACATTGCTAC			√
C7826S172	G/A	AGTCTTTCACCAACTTGCGGCC	TTGTTCAGTCCACCTCACATAC			√
C7897S98	G/A	CGTACTAATGAGTATATGTATAAG	TTGTTTTGCTGTGTATGTGCAC			√
C7938S327	C/G	AAGCCTTGTAGTAGTTGCTGCG	CAGTAAAGTGGACTTTGGACAG			√
C9136S603	G/T	GGTAATGTGGGGCGTTCCTC	TATCATACTCCAAATGGAATTCT			√
C9348S82	A/T	TACTGGTACTTGTGATCCATTG	TATTGAGATACAATGTATGCAGA			√
C10364S361	C/A	GTGCATCAAGCGTAACGTCTGG	GTACTCCCCGAGGAATACCAAC			√
C10394S583	C/T	AAAGTCGCCCTGTATCGGCAT	GGACGTCAAAGATCTCCTCTCC			√
C10449S169	G/C	TTTTCAGTGACAGCAGTAACCC	ACATTTTCAGTGACACAAGTAAC			√
C10611S371	G/A	TACATGTATATCACAACACAGC	AGTACATACCAGGTGCTCCACC			√
C10754S238	G/A	TCTGACATGCTGCTAGGCCGT	TCACAATTCGGCTCTATATCGA			√
C10816S535	T/C	ACTTTCCTGCTCTCCAAACATT	CATTGCACCTGGACCAATTCCT			√
C10906S120	T/C	CACGAACACTGTCTCTGGACAC	ACACCGTCTGCGTCTGAAACTC			√
C10997S402	A/G	AATTATGCAAGGATTTAATGGAAT	CAGGGTCATGCTGATATGATGA			√
C11161S761	G/A	CGAAATCATCAAAAGACCCCAC	GAGCAAAGTTAGTTGCACTTCC			√
C11181S277	G/A	GTCTGTGTTTTCCTTGTCTGAG	ACTGCCTGACGCGGATGTGT			√
C11299S227	G/A	TATACTCTCGCTCCTTCTGGTC	TGGCTCGTGTTTTAGCCAGTTC			√
C11314S190	T/C	GAATGAAATTGCTTATGCTGCC	GACTGGAATTGCATCAGCAGCA			√
C11427S310	G/A	TTCCACCTGTCCTAAGCACGGA	CATCAAAGAAGTGAAGTTGTTC			√
C11434S349	G/A	GTCTGTTAAGTCATAACACAGTA	CTCTAGCTCCCCGGTAGTAGA			√
C11440S223	A/G	TCACTAGGTAGCCGGGAGTAGA	CAGTAAGTTATTAATGTAATTCTG			√
C11472S432	A/G	TACTTGCCACTCTGTGAATTAC	TTCAGAATCTTGACCATTTCTTG			√
C11608S198	A/G	GTAGGTTGCCGACGTAAATTCT	CAGAACCGCCTCTGTAAGACAT			√
C11784S343	C/T	CACTGTGGTCTACAACTGTGTC	GCGGATATCACTTCCCAGGACT			√
C11900S932	C/T	CTGTAGACTGAGTGTGGGGTC	GTTTAAAGATGATATCCCAAACA			√
C12220S327	G/A	CCTCTGCCCTCAAGGAGCTC	ATCTGCAGCCTTGATGAGTTCA			√
C12360S719	G/A	CGTGCGAGGACGTTCGAGCA	CTGAGAATCCGTCATACGCGCT			√
C13269S373	T/G	CTGCCTGTTCGTTAATGAAAAT	CTGATAAATCCTCTAAACAGGT			√
C13536S605	A/T	TCTTCCTCAGCTGACACTGTCT	TGATACGCTAGTAGGATGTCAG			√
C13545S324	C/T	GTATTGGTCACACTCGTCGAAA	ACACTCCTCGTTCAGGGCCC			√
C13551S396	C/T	AACAAAGCCCCATATCTATGTA	TGTATGTCATACCCAGTAGAGA			√
C13680S124	C/T	CCTCGACAAAGACTTTCTCTGT	AGTTGCTGAGTTGTGTCTGTAG			√
C13781S182	C/T	AACATAATTGTGTCATCATATTCT	CATTCACAACTAGAAGCAATTTA			√
C13892S533	A/T	GATAAAAGAGTCAGTCGGTTTG	CCGTTTTGTGTGACACTGAACG			√
C14024S435	T/A	CCATGTATTGGTAGGGCTGCG	GTGCTGGCCGGAAGGAAACC			√
C14102S405	C/G	AGCCGACTAGTACTGGAGGAGT	TTCGATCCTTTAGGGATGTTTG			√
C14103S269	A/G	TGCCTTATTTCTCAGTTCCGTG	CTGATCAATCGTTTCTGACACA			√
C15032S179	T/C	TTGGAGACGAAACACTCGTTCA	AGTGTACCGGCTATAAGGTATT			√
C15074S447	T/C	CACTATGGTGACAGACCCGTTC	CCTTACATGCATGGAACGGCTT			√
C15079S320	A/G	CAGGATGGGGAACATGGTTGG	CTTCCTCGGTGGTGCGGCTA			√
C15099S573	A/G	ATTCCTTGACAGTCATGGCAAC	CGTCATCAGTTAACTGGGAATT			√
C15159S327	A/G	TTCTATGTGGCAGCCCTAGTGG	ATGACTTTCCGTATATGTAAAGA			√
C15316S309	T/C	TCAAAGGGGTTCACGGATTACC	CTCCGGGATCAGCATTCTCATC			√
C15350S427	T/A	TGTAAAAGCTGTCGCTATCAGC	GGTAGCACTTCCTCCACCATTG			√
C15464S826	G/C	TAGCACCATGACAGAGGCGG	GACGAACTCACACGCCGTGT			√
C15487S277	T/C	GTTTCCAATGCAGATCACCCTT	TCGACTTCTTCTTTGATTTGCC			√
C15490S115	A/T	ACATGAATAAATTACGGTTTTGC	TAAGCGTTCAAATAATTAGGTTC			√
C15535S509	G/A	ATATTTATAAAACATCAGTCCTCA	TAGAAACATATCTGTTCACCAG			√
C15573S254	G/A	AATGACGTATGAAGATGGCGAG	GATCACAACATACACCCAGGTG			√
C15576S1003	A/C	TGTATGCCTTTCTCCACAGACA	GAACAGTAACCAAGTTTACGGA			√
C15664S536	T/A	TTGGCTTTTCCTCGGTGTAGAA	CAATAGAGTTCATCTTCTTTAGT			√
C17011S432	T/C	CGTTATTGACACGGTCAAAGAC	CAGTATTCCTACACTTGAACAC			√
C17283S217	G/C	TCATGAACTTTGCCCTGAGTCG	CCGGGCTCGTTCATGGATCT			√
C17980S208	G/T	GAGGATGGTCAAAGCTGCAGC	CTATCAACACCAGCACAGTAGG			√
C18058S655	A/C	TCATCTTCTCCTGCTGTTTCAT	GTGTATGACGGACCGTCATTCG			√
C18160S286	A/G	GTTTACCAAATATCAACAGGAAA	TACCAACAAATACCGGAAGTCG			√
C18236S275	G/A	AGGTGCAAGACATTGATGCAAA	AGGAAAACCCTCAGCTGGTCAG			√
C18400S382	G/A	TTCAATTTTGACCTGAGATGAG	ATACGTGTCGTTGTACCCCTCA			√
C19230S776	T/C	CAATGCCTTTCGGATTTCGTTC	TGAAGTCGATACAACCTCCTTT			√
C19323S683	G/A	GAACACTCTGTCTACGGACAGA	GCACAAACGCACTCAAACTAAC			√
C20056S652	G/A	TGTTGTATCTGCGAACACCTAG	CTGACTCATCAGTGCCTCCCA			√
C20398S636	A/G	CTGAAGGAACTTGAGTGGAGAT	TGGTTTGTCTGACCTCGGCCT			√
C20598S319	A/G	ACACCAATTTGTCGAGACAAAG	ACCCGTTCGTGTAGACTCTGTT			√
C20893S317	A/G	GGAAGGCTTTGAAGCTGGTTAT	AGAATTAGGGAAGTAAGGCTAC			√
C21023S657	T/C	TTGACCCGTCGTCAGTAACAGC	GTGTGCTGCCATCTAGTGTGAA			√
C21108S331	A/G	AGAGTTGTCTATGCAGTCGGGA	ATCACCGACCTCCGCACATG			√
C21527S215	G/A	TGACGTCATCTTCGGAAATGAA	CCCCAAGGCAACGATGAAATAT			√
C21680S610	A/G	AACGCGCAATCTCGCAGATATA	GGTCAAATCCGGTACAGACACA			√
C22018S152	A/G	GCTGTTTGAACATCTGCATGCC	AGAGTCCTAGACCCAGTGTGAA			√
C22321S569	G/A	GGAAAGGGTCAATTGCTCTCCA	GATCACTTTAGATTTATCAAAAGT			√
C22647S316	A/G	GGGTAGTTTTGAACACTTTGAT	CTTCTTTAGGCATTGCTTCACC			√
C22746S608	G/A	AATAGTACCTCTTCTCCTTCCG	ATTTCCATGCTTCCGGTGGCG			√
C23174S1174	T/C	ACGTATCCATTCCGGGGTCAAA	GCTGGCAGCTCGTCACCGTA			√
C23502S361	C/A	GTGTTGTGCAATCGCCTCGGAT	TCCGTCTGTCCGTGCTTCCAA			√
C23541S494	C/T	AGGTAGGGATCCTGTCTTT	TCTGGACGAGTGCTTCAGTCCA			√
C24279S223	T/A	TGGTTGGGAAAGAGGGTATTTC	GAGCTAACTTCTGTCTGTCGAC			√
C25240S458	C/T	TCAAGATGTGGGTATAGAGCCA	TGCTGAGTTAAGCCATACTCAA			√
C25718S135	A/T	GCGAAATCGGTCTTGTTTTCCA	GGCTGTCACCTATCACCTGTCT			√
C26847S448	C/A	GACTGACGGAGAAACGCATCAC	TGTTGTGGGCATGTTCGTAAGT			√
C27248S731	A/G	GCCACTACGACAGCATCGGA	GACGAATTCGAGAACAAGGTTT			√
C27329S596	T/A	TCCACAGAAACTTCTCGTCATC	TCTGGATGACCAGTGGCACATC			√
C27495S288	A/G	ATCCTAGCTCGCACGTTACCAA	GTACATTCATTTGACCTGGTGG			√
C27529S395	C/T	CTGTGGATTTCTTGGTTACATA	TGATAGCAGAAGGATGATATTAG			√
C28317S551	T/C	CTGCTATACCATTGGCAGTCTG	TGCTCTGTTGGGATGTAGCACT			√
C28323S774	A/T	CGACCGGATCGACAGTGTTTG	TGGTATGCCTCATTACTAGGAT			√
C28760S569	C/T	TTGCCAGCTGATCTGACAAAAC	GCTAAAATTCATATTCTGTATGTT			√
C29470S74	T/C	TGCACATACAGAACAACCTAGA	GAGTTCGGACAGGACGACACAA			√
C30309S256	C/T	ATGCCTTGAGGGCGGAGCTAAA	CGCCCTCCGATTCCGCATAC			√
C30319S474	C/T	CGTTATGACTGATGGACAGTCC	CAAAGCAAGCACAAGTAGACAG			√
C30392S616	C/T	CGACATTAAGTACGGCGACTCT	GTTCATCCAACACAGTGACACA			√
C30508S221	T/C	TCATGCGTACCATCACCGGCA	AACGATATCTGGCACCACGCTA			√
C31420S1562	T/C	ATAGCCAACTACTATGGCAGCA	AGAAAGAAAACGTATGGTGAAG			√
C31964S245	T/C	CGTGTACGCTGGATGTTCTGC	ACGGTCCATATCCATGCCACTA			√
C33395S1165	A/G	TGTTGCATCGTTCGACCATTGT	TTCACCGTTCTCAAATATATGC			√
C34314S189	C/T	AGCTTGAAGCCATATTTAAAGC	CTAAGAAACGACAGACACTTTT			√
C34472S317	T/A	CAGTTGTGATGAGTTGACCTTC	CACCTTGCAGTTTCTGGAACCT			√
C34651S168	T/C	TGTTGGCATGCCAAATTCCTAC	ATGCCAGGCCCAGACTTGAATA			√
C36838S153	T/C	AACAGCCTACACTGTCATTCAC	TTGGAGACATGGACGGGGATA			√
C36957S809	C/T	AGGAGGGCCAGCCTTTCAGG	TGTAGTCATCGTCTTGTTCCTC			√
C37251S328	C/T	GGACAGAATTTCAGAGCTTAAT	CAGAAAGTCACCGGTAAAACTA			√
C38377S523	C/A	CTATACATGACGTCATACAGTT	TGTCTTTGTCACATCTACCATC			√
C38649S135	A/C	GGTCTATTCCATGTTCATCTGA	CTTCCCAGAACTTGGCACCTAT			√
C38699S582	C/T	TGATCAAATGTCCATTCTACAG	CCGCAACTGGCTGTTTAGCATG			√
C39398S312	G/A	GGATACCTTGATTGTCGCTAGG	CTTTACACACACCGCTCGTGC			√
C39637S192	C/T	TGGAAGACACACGCACTGCTG	CAAGGTTGCATTTCGAGTACTT			√
C39642S329	C/G	TAGTAAGATGCTGGTGTGTGAC	TGATAAAGGTTACCACACTTTC			√
C40114S408	T/C	CTCCTGGTTCTTGATGTTGATG	GCATGCTCCTAAACATGCTGCT			√
C40868S881	T/C	CTCTATCGCACATTTGAACTCT	GCTTCAATGTATCCACTGTTTC			√
C41019S353	T/A	ACGGGATGAGTGGCACTTCGT	TACACAGCTTGGCCACCTGACT			√
C41030S127	T/C	GTTCTACCCCAAGGCAAACTTC	AGCAGTAGGTCTGATACCAAAC			√
C42744S430	G/A	CCTGATTCACAAAATCTAACGT	GGGACTGGTACACCAGAAAATC			√
C43500S454	T/C	GACTAAACTACTGAAAAGTGTC	ACGATTTCAAATGGACGGACTG			√
C43906S314	T/C	TCCAATACATCAAGTCGAGACA	CGATCTTCTGTGATTAGGGCCT			√
Q5029S14	T/A	CCTATGAACTTGAAAGGAGATT	AACAGCGGTACCTGAGTGCTC			√
Q23361S4	G/C	TGGGATTACCTAAGCTCCTGTA	ATGAGAACTGCAGTTTTGTCTT			√
Q27746S4	C/G	CTCAATTAAACTTTTACTCCTTC	CCTTCAACATACATTTGTACCA			√
Qf8492S13	T/C	CCTACCAATACAACAAACCCCT	TGATGTTTCCTGCACTTGTAAA			√
Qf8493S24	G/A	CCCTGCATGTAGGGCGTAAGAA	ACTGCTGCTCCCAATTTGTGAT			√
Qf34236S15	T/C	GGCACAGGAGTCAACATCACAC	CCTCCTCTATCACGTATATATC			√
Qf38541S9	T/C	AATAGATTATGGGAGACATTGTA	GTCTTGTTTAGTAGTAAATAACAC			√
Qf40984S15	G/A	TGTTCAGTAACTGATGGGAGTG	ACAGCTCCCTCGTCGAGGTA			√
QM242S0	A/T	TGGAGTAACTGTCTGTTTTCAT	TGTAAATGTCCTGTTGTGGTTG			√
QM1820S24	C/T	CCCTCCAACTTGCGTAAACTCC	ACCCCAACTCCAACCCTTTAAC			√
QM6450S23	T/C	CTGCAACATACTACAAATACCC	ACCTTTCCTCCATAATTATCCA			√
QM8840S6	A/T	AAATCGCAAACATGTCCTCCTT	TATATACCTTGGGACACTAATTC			√
QM10236S14	T/A	ACCACACAGAAGGGCTCACCAA	CACTGTTCTCAATACATTACAC			√
QM11911S9	C/T	CGAACCAACAGGAGTATAAGTG	GCTTTTATCACTCACAATATAGA			√
QM13606S13	G/T	TAACTAACACGCGAGGAGAGCT	CCAGTTTTCTTCAAGAACATTTT			√
QM13905S4	C/G	CCAGTTTTCTTCAAGAACATTTT	AGGTTGGTGTACAGCTTCAGAC			√
QM16407S4	T/C	AGAGTGGAGAGTTGGTCTTGTC	AATGTTTATGGCCCTTGAAGAA			√
QM19693S5	G/A	AACAAGGAGAACAAGTTATCGG	TTCCATTCGAAACCGTTTCACG			√
QM20050S2	C/G	CGGAGTTGACGTTCCTGGCA	TAAAATAAGAAGGGTCAGGAAC			√
QM20594S26	A/G	TGTTTATACCCTGTCAGTAAAC	AAACTATTTCCCCGGGACATTC			√
QM24098S25	T/C	TCAAGTAGTCTATAAATTAAAAGC	TACAGCCTCTCCTTACGGTTTC			√
QM32890S24	T/C	TACATGACAAATCATTGTAGATG	AGCGAGTGTTGAGATACTTATG			√
QM33502S22	G/T	CTCATTGCTGCTAAGATCATAA	AGCTTCTCCACGTCTTTACACA			√
QM35297S17	G/T	GGTAAATGATACATGAGACCAC	CTCCATTGCATTGATACTGGTG			√
C22250S833	G/A	TCATGTTGGTGAAGACCCGGA	CTTATGGGTGAACGTTGTCGTG			√
C29195S221	G/A	ACCGATATCTTCCAAATGACAC	AAGTCGCCCAACGCCAGGGT			√
C40538S336	C/T	ATGCAGGCTGTTCGGGATCAAC	CAAACAAGTGACAAGCGTTATC			√
C5503S984	C/T	TGTACCGTCCTCCTCCCAAACA	TGTTTCTGTGACATCAGCACCA			√
C50491S222	C/A	CGCGGACATGTAACATGTACTT	CGGGTCCACTTTCGTGATCTTT			√
C13378S866	A/G	CTGTAGGTATTAGCAAAGGTATA	TTTCGGCTGCCGACAGGAGTT			√
C41820S358	G/A	TGGATTCTTTGTCCTGCTTCTG	ACCCTTTGCCCCATTCCTGGTA			√
