# Supplementary material for: HD-Marker: a highly multiplexed and flexible approach for targeted genotyping of more than 10,000 genes in a single-tube assay
Source: HighWire-hosted journal article supplement (doi:10.1101/gr.235820.118), 2018-11-08
Supplement: Supplemental_Table_S2.xlsx [file Supplemental_Table_S2.xlsx]

## Sheet: Sheet1
Table S2. Summary of probe information for the array-synthesized multiplex level (12,472-plex).
SNP ID	Scaffold ID	Position	SNP	5'locus-specific-seq	3'locus-specific-seq	SNP location in target genes
SNP10000525	scaffold11101	1732813	C/T	GTCGGTCGTCCCATGTGCCTAA	GTCCCTGGAACATCACAGAAAA	intron
SNP100034	scaffold497	71969	A/G	ACAAGCCAGGTGATGAAGAACT	TTACTGACCATAGGGTTTACGA	exon
SNP1000682	scaffold6135	2899027	T/C	ATGGCTGTCCACTCAGCAACAT	CCAAGTGGAATGACCTTGTCTT	exon
SNP1000894	scaffold6135	2942718	T/C	CAGAAGTTGCTTGCCTTTGACG	ATCACGGCAGAACAACAGACGA	exon
SNP1001176	scaffold6135	2964632	T/C	CCCGCAACTCGTTCATTGTATG	CCTGAAATTCACCCAACTCATT	exon
SNP1002594	scaffold6135	3287260	A/G	TCCTCACCAACAGTTGTCCTAC	GTCAGTGTGACACAAACTCCAA	five_prime_UTR
SNP1002724	scaffold6135	3304832	T/C	CATTGTGGACGCCTTTGGCTCA	AAATGTTTCGGGGACATCTGTG	exon
SNP10032988	scaffold11111	145777	G/A	GTGATTACAGTCCAGCATGTAC	GTACCAAGGTGTTAACGGCTGA	exon
SNP10034576	scaffold11111	439356	A/T	AACCCGTCAGTCAAGCATCTCT	GCCAACAACCGTTTAGAGGAGA	exon
SNP10034864	scaffold11111	466677	G/A	AGCACCCTCCATTAATGGCTAT	GTGTGATATCCTCTGAGGACAC	exon
SNP10040509	scaffold11115	80529	C/A	CTGGAACCTAGAATGTGGCTGA	TGCATAGACTGAGGACAATTTG	three_prime_UTR
SNP10041120	scaffold11115	132784	T/C	AGGGTGAACACAATATCCTGGA	ACAGGCTGGAGAACGAGGTCAG	exon
SNP10041630	scaffold11115	200941	C/T	ACTCGGATAGTAGCTCAGGGTC	ACAGTGGCTACAACTCTGAATC	exon
SNP10041901	scaffold11115	277224	T/G	TTATGTGTCTGTTTTGCAGGGC	GATACCCGGACCACAAAGCCAA	exon
SNP10042597	scaffold11115	374528	C/A	GAGTCTTGTAGTCTTCCAGTTC	TCCTCATGTCTACGCTCTGTTT	exon
SNP10042699	scaffold11115	400113	A/G	TGCAACATGTTCTCCTACCTTG	AGATAGAGGGTCAACGGCACCA	intron
SNP1004270	scaffold6169	845965	C/T	TACTAGCACAGTAGGTTGAGGT	ATGACTGCGTTTCTGAGCCACT	exon
SNP10045844	scaffold11115	746229	T/G	CAATGGCCAGGGTGTTCATGTG	TTCCGTCATCCGTGTCTTTGTC	exon
SNP10050632	scaffold11117	635435	G/A	AGTATGCAAGTAGGTGTGGGCA	CCCAGCATTGAAAGCATCTTTA	intron
SNP100520	scaffold523	59837	C/T	ACCACTAATCCCATTGTTCCTC	CCAGTGTTTCAGGGAACAGATA	three_prime_UTR
SNP1005201	scaffold6201	32595	T/C	CTTTACACCGACAGAAATGACA	CCAGTCCAACAACAAAACACCA	three_prime_UTR
SNP10053603	scaffold11119	7596	C/G	CAGATCTCCTAGGATTAGCCGC	GGACTGGAGCCGCTATTGCTCT	intron
SNP10054020	scaffold11119	88682	T/A	AGATGCAGAGTCTGTCAAAAGA	GGCAACTCCGGAAAGCAGCAAA	exon
SNP10054255	scaffold11119	112145	G/A	TAAATGCCAGTGTTTTCGTCCT	AACTTCGCAAAAGATGGCAATC	exon
SNP10054753	scaffold11119	190396	C/T	TCACAGAGGAACAGTTAGAAGA	AAGCTACGTTCAACAAAACGCA	exon
SNP1005737	scaffold6205	83120	C/T	GTGACAGCTGTCCATCAGCATT	CCATCGTATCGAAAATCTTGTC	intron
SNP100578	scaffold523	71660	C/A	ATCCAGGGGAAGTTGATGCCCC	TGTACCCTGTATTTCCTGGGGA	exon
SNP10058190	scaffold11119	480592	A/G	AGATGTCGCCAACTAAAGAGGA	ACTCCATCTCACAGATGTGTCA	exon
SNP10059510	scaffold11119	635721	T/C	GTAGGGAGCCAGGATTCCAAAA	ACAAGCATGATCATGTGGATAC	exon
SNP10060058	scaffold11121	30293	C/T	CTGCCTCCCAGATTTTCCCTGC	ACCGGACAGACACCTTCTTACC	exon
SNP10060409	scaffold11121	63707	T/C	ACAGATGGTCGGTGAAAACTGC	AGAGGTCAAAGGTCCTGATGAA	exon
SNP10062376	scaffold11121	275834	C/T	GCACTGATGTGTAGAAAATGTC	CGTCAACTTGTCATCAGCTCCA	intron
SNP10062718	scaffold11121	329700	T/G	TGTAGGTTGGTACTGTCACTCC	AGGACTTTGTGGCGTTCATCAA	exon
SNP10063240	scaffold11121	442525	T/G	CTGACATGAGTTTCGGTTTCTT	TCCGTGTGAGAGTTGTGATACT	intron
SNP10071681	scaffold11125	68583	T/G	CGTGGATTTTCCCCTGTAGACT	AGGACCCAGACAACTTAGATGC	exon
SNP10072285	scaffold11125	143953	A/G	AACAGGACACTTTCACCTGCCA	ACTACGTGTCACATTCCGACCC	exon
SNP10072998	scaffold11125	228166	G/A	AGTGCCGTTAGCTCCACTACCC	CCTTGCTCCACCATCCATGTGA	exon
SNP1007360	scaffold6213	54211	A/G	AATAGAAACCTTGTCCACCGGA	CGGGTCATTGGTACGCCTTCTG	intron
SNP1007383	scaffold6213	56498	C/A	GCTCAATGGTCACCACATTCAC	ACTTGACCATTTCACGCCGAAG	exon
SNP10074465	scaffold11125	374866	A/G	ATCTGACGTCACACAAAGGAAC	CCATCGATCAAGGTGATAGCAC	exon
SNP10074700	scaffold11125	407415	A/G	CAAGGTTGCACTTGTGACATCC	ATTTCATTCCTTGCCCGACAAG	three_prime_UTR
SNP10075060	scaffold11125	492959	T/A	GCCGCTCTAGTCCACTTACCAC	CCACGTGAGTACCTACCTTATC	exon
SNP10075421	scaffold11125	545509	G/C	TTGAGGTAGCTTGTTGGATTCC	TGAGAGCCCCAAGATGTGTTCT	exon
SNP10075586	scaffold11125	576579	C/T	TGCAGAGTTAGTGAGAGAGCTC	ACTGGGCATGGACATTAATATG	five_prime_UTR
SNP10077267	scaffold11125	957563	T/C	GACTGGATGACAATACAACTCT	CTGCCCATAAATCGGTCAGTAC	exon
SNP10077552	scaffold11125	1028742	C/T	TGGCGTACTATGTCAGCAAACG	ACATTCTTCATCAGTGTGTCCA	exon
SNP10078690	scaffold11125	1288660	T/C	CCAACATATCCTTGTGTTGTGA	AAGTCACGTAGCTACGGGATAT	intron
SNP10082819	scaffold11129	135109	G/A	CTAATGGAACCATCGCTACCAC	CAACACCCATAGCCAGTGGTCG	exon
SNP1008615	scaffold6217	133428	G/A	ATATCCGGTGAATCTTTGGTCG	GAAACATCAGCTCAATCGGTGT	intron
SNP1008699	scaffold6217	147859	G/A	GCGCACCATGACTCCCTTAAAC	GGTATCTGGACACGATTTCCGC	exon
SNP10089588	scaffold11131	514154	G/C	GAGTCACAGGTAACACGGGGAC	AATCAGCCATCCATGGTATTGC	intron
SNP10090539	scaffold11131	631190	T/G	TCCTGTACAGCACATTCTCCTT	TTGAGAAGTCTTCGTTCCTCAC	intron
SNP10095315	scaffold11133	242908	T/C	GTACCTGTCTGGTGCAAGTCGT	TGGTACAGAACCGTACTGGCAG	exon
SNP1009572	scaffold6217	328896	T/A	AAAGCTCAACTGCGCCTATAAA	TCTTCACTTGATACCGCGTAAC	three_prime_UTR
SNP10097045	scaffold11133	657012	C/G	ATACCGACGAAGACAGTTCAAG	GGCCAAAACACCTACAGCTCCA	intron
SNP10098227	scaffold11133	905131	G/T	GAAGTGACATATACCGGTCAGC	ACCCTGACCTTCACCGACCTTC	exon
SNP10104779	scaffold11133	1869770	T/C	CCAATGGGAGTTTGATGAAGCT	CTAAAGACAGCATCACAGATGT	intron
SNP10105688	scaffold11133	2110431	T/C	AGGACCTGCCTAAAATGATAGA	GAGTGGATTATTTTCAGCCAAG	exon
SNP10109857	scaffold11133	2745046	G/A	ATTAGGAGAGAGCGATATGTCA	TGAATTGGGTGACATCTTGGGA	three_prime_UTR
SNP10110974	scaffold11133	2905562	C/G	TTTTGCGATACCAGGTGTGTCG	CTGGAATTTCGACCTTTGTCTT	exon
SNP10112152	scaffold11133	3155227	C/T	CAAGTATGGAGGGGAGGAACAC	GGCACCATCCAAACAGCTATTA	exon
SNP10124915	scaffold11137	633548	T/C	TACCCCGTTCACCACTACCACG	CACCACTATAACCACTCCTGAT	intron
SNP10128042	scaffold11141	31504	C/T	GAAAGCATTGTCGTGAGTACTT	CCGGGTTCAGACGAAGAATATT	three_prime_UTR
SNP10129242	scaffold11141	173472	A/T	TGGTTGTTCCACATTTGTACAG	GTGTCGATTTCGTTCTTCTCTC	exon
SNP10129975	scaffold11141	667220	T/A	ACGCAAAACCAGTTCACTATGT	TCCTCTCACATTAGAGGCTTTC	intron
SNP10133267	scaffold11143	508171	C/T	TACGTTGTGTTTCCACTGTCGA	TACAAACACGAGAAATCGGCAC	exon
SNP1014707	scaffold6307	156725	A/C	GACATAACCTGGCCATGACAGG	TCTCCTTGACTGGGAAAGTCTT	exon
SNP10148088	scaffold11145	457796	C/T	GCACTACATAATCACATGCTTC	TCAGTGATGTAGCCGGATGTGA	intron
SNP10151003	scaffold11145	1087849	T/C	TGTATTCCGTGGGGAGGTCGGA	GAGCACCAAGCAGTATGATTTC	intron
SNP10151273	scaffold11145	1157576	G/A	AGTAGGGTGCCAACTCATAAAT	GCCACAGATCGAAATAATCAGC	exon
SNP10152046	scaffold11145	1223382	A/G	AATTCCGAACGCCACAGAAAGT	TCATAGAGGAGCTTACAGAGCT	exon
SNP1015325	scaffold6307	346200	T/C	CCGCATTCTACACCATTGACTA	ACAAGAGCTGTGACAGGGAGGT	exon
SNP1015465	scaffold6307	380908	G/T	GGAAAACAAGCGCTGTTGGAGG	GACGTCCAAAACCGGAGGAATA	exon
SNP10158650	scaffold11145	2222343	T/C	GCTGAATGCACGAAGGAATTTC	CGTTTCAATGAAACTGTAGCCA	exon
SNP10159511	scaffold11145	2377194	A/G	CTATGGCTGGCATACTCAAACA	TACATGGGATTCAGCACGTCGT	exon
SNP1016131	scaffold6307	492220	C/T	TCAGAGAGGTGGTTACCCCTAC	CAGAGTTACTGACTTACGGTCA	exon
SNP1016509	scaffold6307	520931	C/A	ATGTGGAGTCCCATAGATCATC	AAACCACCATCTTGGATACAAG	exon
SNP10175933	scaffold11153	133229	G/A	CTGGCAACAGGATTCGATGTAC	CAGAACCAGCCTGGGATACCAC	exon
SNP10178837	scaffold11153	584570	A/C	AAGCAAGTAAATCAGTGAACGC	GACTAGGCATGATGCCTTTGTA	intron
SNP10195098	scaffold11159	205280	C/T	GGATGAAAGCAGTTGACACATA	GGTTACAGAGAATGCACAACAC	intron
SNP10197450	scaffold11159	502314	G/C	CCAGTGTGTATGGTGTCATTAT	ATGGCAAGATGGATTCCCAGGC	intron
SNP1020188	scaffold6353	151564	T/A	ATGAATCTTCTCCTGGGGAAAA	ACCGACAGAGAAGTGGTTGCGA	exon
SNP10207249	scaffold11161	1170504	T/C	AAAGCTCTGGCATGTGGAGTTC	TCTCTCGGTGAAACAAATGGTA	exon
SNP102084	scaffold523	318512	C/T	CACATGTTGACCAGGTTCTCCT	CATTTGTATGCCTTACACTCGG	exon
SNP10212889	scaffold11163	154107	T/A	TGATGTAGACGAAGGTGACATC	GCTGTATGATGGGAGAAACATT	exon
SNP10216392	scaffold11163	586387	A/G	TTACCATGGAAACCTGTGACTC	GTCAGATCTAATGACAACAGGT	three_prime_UTR
SNP10220824	scaffold11165	228809	T/G	ACCTACAGGACCACTTGATGGT	TACCTGTTCTCACCAACACGTC	exon
SNP1022110	scaffold6363	398716	T/A	GGTTGTGTCTGGTAAGGGTTCA	TGGTGGGTCATTTTGCTGTCCA	intron
SNP1022198	scaffold6363	440904	G/A	GCGTCCAGGACAGTGACGATAA	TGACACATGAACTAGAAATCCG	exon
SNP1022261	scaffold6363	468970	G/T	GAATATGCTCACCAGATGTTGT	GCCACTTTCAGATTGTGTCAAC	exon
SNP1022639	scaffold6363	603870	G/A	CCAGTTAGTCTTCTTTGGGGAC	ACCAGGTGGATGGTGGTTGGTA	intron
SNP10229180	scaffold11167	64550	A/G	TTACACTGGCAAGAAGTCCGGT	CTGCACACATTTGACGATTGTT	intron
SNP1023234	scaffold6363	775013	A/T	TGATCAACCTGTGCCCAGCTAT	GGTGCTGGTTTGGTATCTAAAA	exon
SNP10233090	scaffold11167	543490	C/A	CATATGAAAGTTTTCCGGAACG	ACCCTCCATTTTGTTCCGGGAC	intron
SNP10243902	scaffold11169	1000012	G/A	TCGGATTTTCAACTGGTGGAAG	CTGCCTACTCACCTTAACGACG	exon
SNP10248683	scaffold11169	1478180	G/T	CAGCTGGACTTTGGACCTGGGT	AGCAGTTAGCATCGTTGTGGAA	exon
SNP10252526	scaffold11169	1892216	C/T	ATTTCCAGTGATGTTTCGTTGG	CATTTCGCACTGTAGTGTAGTG	three_prime_UTR
SNP10252633	scaffold11169	1905716	A/G	ATGGGGTCACAGGTCCTATTAC	TGTTCTCGGGTACTCGGGTTTC	intron
SNP1025415	scaffold6363	1303001	T/C	TACCTAGGAGCAGATGTCAAGT	TGTTCCTTCACCCAATCAAGAA	exon
SNP1025418	scaffold6363	1303829	T/C	GAAAGATATACCTTGGCCGTGG	GTTCTGCTGGTGGCGGAACATT	exon
SNP1025740	scaffold6373	50902	T/G	CAACCAAACCTTGCACAAACCT	AAGGACAGACTGAATATGAGGT	five_prime_UTR
SNP1026106	scaffold6373	178210	C/T	TCTAGCCATGTTTCCATTCGAA	TGTGTATATCGCACGAGCGCAC	three_prime_UTR
SNP10262825	scaffold11171	1115530	G/A	GACGTCCCTTCGAGAAGGAACG	ACCAGGAGTTGAAACTTATCGG	exon
SNP10267781	scaffold11173	114264	G/T	GCTCACTCTTGTGTACCACCTC	TGATAATCACCAAGCCTCCTGT	exon
SNP1026885	scaffold6383	156752	A/C	CGAACGGTGACCAGGAGTTTGC	TGCTTTGTGAGGATGAGGATGG	exon
SNP1026889	scaffold6383	158761	T/C	ACTCGTACAAGCTGGTCAGCAT	ATCACCAGGGTAGCACTTCAGT	exon
SNP10268994	scaffold11173	245284	T/C	ACATTTCTCAGTACGACTCCAG	CGCTGAACGCCAATGAGAGTTC	intron
SNP102769	scaffold523	376775	G/A	TGGCGTGAAGCGTCTATAAGTA	TCCTGAGGCCTCTGTCTGTGTA	exon
SNP1028595	scaffold6383	377043	C/T	ATGAGCAGTCCAACACAATGTG	GAGAACACAACTTGTTGGAATG	exon
SNP102918	scaffold523	384742	C/T	ATTTAATGCCAGTTCGGCACTC	CTCCATCTACCTGGACAAAGAT	exon
SNP1029254	scaffold6383	457127	T/C	GCTGGCGAAGTTTCTGTTGCTG	GAAGCCAGGATGAGGTCTGTTC	exon
SNP1029255	scaffold6383	457272	T/G	TGAGTGAGTCTTAGGACTTTCA	ACGCTGAAGTTCAGGGGACGTT	exon
SNP102945	scaffold523	386295	T/G	TTGGCGAGTTGGTCAGTTCTCC	TGGCAGGCTTCTTTGTAGGGTG	intron
SNP10306570	scaffold11177	1213176	A/G	GAGAGCAGGGCGTGTGTAGTGT	ACGGACCAACGGAAACGGACAA	exon
SNP1030691	scaffold6383	854725	T/C	TCCGTTCTCTTCACTGTCAAGA	CTCGCTGATATGACGTAGCGTG	intron
SNP1030961	scaffold6383	886384	C/T	GCTTCAGGAACATCGCCATTAG	GCATGACAGGTACCCACTGATA	intron
SNP10311364	scaffold11179	221777	T/G	AATCACCATTGTCGGAATTGGA	ATGGTCAGGATGTAGATTCGGA	exon
SNP1031439	scaffold6383	948978	G/A	TTACCATAGTGACGTCCACACA	CAACAGACCTGACCGACCCTCT	intron
SNP10316941	scaffold11179	1054041	G/A	GCCACATCGAAAACATGATGAA	TCACCAAGGTAAAGTCAGTGAT	exon
SNP1031849	scaffold6383	989276	T/G	CTGGCATTTTATCTCCTCATCC	GTGCTCCGCTATTTCGCCTACT	intron
SNP1032061	scaffold6411	31282	C/T	CCAAAGCCAATGTTCTTATCTC	CAGGATACGAGGGCATCAAACA	exon
SNP10321297	scaffold11179	1378228	T/G	ATGTCGAACAGCGAACGACGAT	CACGTTGGTGTTGTTTATCCTT	exon
SNP10321578	scaffold11179	1393644	A/G	TCTGTGATGAGGGTAATGAAAC	AGGTGGAACAGCCATTTAGTAG	intron
SNP10321941	scaffold11179	1450032	G/T	AACTCGACAGTGACAAGAGCGG	TATCACGAGAGGAGTTTATGGA	exon
SNP1032748	scaffold6411	236939	C/T	ATGGCAACAAGCCAATTCTTGT	TGGGGAGCTGCTATGATGGAAA	intron
SNP1032866	scaffold6411	254954	T/C	AGTGTTTGATAGATGGGGCAGA	ACCTCCAGTTAATGGCACTATT	five_prime_UTR
SNP10330991	scaffold11181	38080	C/A	CCTCGTCGACTGTAACAGACTG	TCCCTGTGTGTTTGGAGAATCG	intron
SNP10331027	scaffold11181	42609	C/T	AAACCGCCGGAAGTAGTACCAG	GTGCTCGTCTGTAGATGTCAAT	exon
SNP10331185	scaffold11181	60121	C/T	CAGTAGATTTTGTACTTCCGGT	TCCCTGTGGAACTAGAGGAATG	exon
SNP10333899	scaffold11181	222241	C/T	TATCTGGACCATGTAAAGCTCA	GTACAGCTGGTCAAAATGTCCG	three_prime_UTR
SNP10334506	scaffold11181	305583	G/A	AAAAGGAGAAGGCCGAGAGAAA	AGGGACCAAAGTCAGGAGTAAA	exon
SNP10334598	scaffold11181	336739	T/C	CGACTCTACGTGGTCCTAGTGA	AGGTCAACCCACTTGGTAGTAT	intron
SNP10334810	scaffold11181	393701	G/A	GAGCTCATCTACATTGTCAGTC	GTTTAACAGTAGCACCTGTTGA	exon
SNP10334883	scaffold11181	418978	A/G	CCCCTACACATCTGTCAACCAC	TACTTCCTGTTGTCGTGGCAAC	intron
SNP10334983	scaffold11181	443567	C/G	ACCTCGTCAACATTCAGTTCCG	AAACCACCATCCACGACATCTG	exon
SNP10335541	scaffold11181	569212	T/C	CATCACATGGAAAAGCGTGCTG	TGACTATCTGTGACAGCAAACA	three_prime_UTR
SNP10335563	scaffold11181	572046	C/T	CACCGAACTGCTTCCGTAACAA	TGCGTATTGCATGACGACATTG	intron
SNP10337015	scaffold11181	874056	A/G	CAGAGCTTACAGAGGAACAGAA	AAATCCGAGAGGCGTTCGATTT	exon
SNP10337110	scaffold11181	889542	T/C	CTATGGCAATCAAGGTCGCAGA	CAGGGAAGGTCACAAGTCATAA	exon
SNP10337890	scaffold11181	1009665	T/A	TTGATGCCATTAGTGGTGTTGT	CCAACATGGTGTTTGATAGAGA	exon
SNP1033825	scaffold6411	523628	A/G	AACTGGTGACAATGACAGACTT	AAGGTAGAGTGTCCTAGCGTTC	intron
SNP10338622	scaffold11181	1143312	T/A	TTCGCTCTCATCACACAATGTA	CGTGCAGAGCTTCCCTTTGGAC	exon
SNP10339196	scaffold11181	1237721	A/T	CTTGCCATTACATGTCAGACTT	TTTGTGGCCTATAGAGGCTTGC	three_prime_UTR
SNP10339504	scaffold11181	1288661	T/A	TGAGAATGATGTCATACCCTGC	CACACACAATTACCGCCTCGTT	exon
SNP10352340	scaffold11183	1782447	A/G	CCGCTGGAGGAACTATTGGAAC	AGTAGCTGCCTAGATTAGGAAG	exon
SNP1035585	scaffold6439	82107	C/T	CGGACAGTGACTCAGAACTGGA	AACCTCTCCTCCCACCATAGGT	exon
SNP10357949	scaffold11185	126470	A/G	ACTGGCCATCAACTGTCAGTTC	CTCGGGTAAGTTCGTCCACCTC	exon
SNP10358484	scaffold11185	261453	T/C	CCTAACTTGTTACCTAACGCCT	ATAGAGGGGAGTTTCATTTGGT	exon
SNP1035892	scaffold6439	171059	C/A	CACCAAAGGCGTGAAAGACGAC	CCTTTCCTGTACTGATGCTGCC	exon
SNP10358970	scaffold11185	367986	T/G	GCTGTAGGATGAACTGAGAGAA	TGACAATAAATCTGGCGACGAT	intron
SNP10359015	scaffold11185	385631	G/T	TCTTACTGTTGGTGTCCATGGC	GTTCTGCCGTTAGTTTCTCCTC	exon
SNP10359163	scaffold11185	457372	C/T	TCCATACGGTGGTATGCTGCTG	TAACGTTATTCCACACAGAAGG	exon
SNP10359207	scaffold11185	470011	A/G	CAGCATACTGCAAAACTTACAG	ACAATGAGTTCCTGGCATGGCC	intron
SNP10359338	scaffold11185	501702	G/T	ATTTCCTGCAGTTACCTCCCCT	TCTGTTTAGATACGGGTCTAGC	intron
SNP10360124	scaffold11185	722170	A/C	ATCCCAGTGGAAATAACGACTG	GTAGATGCTATGCTCCGTAATT	three_prime_UTR
SNP10360249	scaffold11185	754306	G/A	CCTCTACAGCTGCGCTCTTTCA	AGGACTACAACATTCATATCGC	exon
SNP10360991	scaffold11185	865464	G/T	ACCGGATTAACCAGAGGCAGTT	TTGTCGCTAAAACGTAGATGTG	exon
SNP10361146	scaffold11185	909676	A/G	TTACGTGAACAATATTCCGACC	ACCGGATTAATCGGCAATTTTG	intron
SNP10361532	scaffold11185	971091	T/C	CCGAACCATTTTCTCCGGGGAG	CAAGGATTACCCTTGAATGGTC	exon
SNP10362563	scaffold11185	1220506	A/G	CGATGGACGTAGGTTTCGTGGC	GTTTAGCGTCGATTTTGACTTC	intron
SNP10363219	scaffold11185	1280295	T/C	CCACAATCTTCTAGAAAGCGAG	CCTAGTCTAGCTGCCCCATTGT	intron
SNP10364245	scaffold11185	1436697	A/T	GCCTGGGTTTCCAGCATGATGG	ACAATGTGTGTTTCGCTCCTCC	exon
SNP10364471	scaffold11185	1456367	A/G	GTAGCTGACTTGTGTCCATCAC	CTCCATACTCCACACCACTGTC	exon
SNP10366303	scaffold11185	1594087	G/T	CCTCCATACTCATGGTTGTGAA	GGTTATGGTGTGCCTGTATCAG	intron
SNP10366567	scaffold11185	1608540	T/C	GCATGAAAGAGCTTGCTCAGGG	TGTATGGCATGGTTCCAACTAA	exon
SNP10366752	scaffold11185	1620329	C/T	GGAATTCTAGACGGCCATTTAA	GACTTAGTGAGCCTTTCATGGC	exon
SNP10367151	scaffold11185	1657760	A/G	ACTGATGTGAATGGAACTGTGG	AAATCGGAAAGTTTGACGCAGA	intron
SNP10367457	scaffold11185	1675866	T/C	CGAAGTGAGATACAGTGGCGTC	CTTATTATACGCCGGGCTATCT	exon
SNP10367498	scaffold11185	1681573	G/T	GTGAACTCATGGCTACCAACCA	TTCTTCAATCGGATATTGGGGC	exon
SNP10367568	scaffold11185	1695954	G/A	CAGGTGATGTGACAGTCCCGAA	TAGCTCCGTCAGTGAAGTTGCC	exon
SNP10367630	scaffold11185	1700788	A/G	CAGAGGACCTGAAGGTTCCCCT	TCTCTACGACCATGAACTCCCC	exon
SNP10368110	scaffold11185	1736729	T/G	TATTGACCACAGAGATCTCGGT	ACAGACGGTTCAACAACTGGTG	exon
SNP10368517	scaffold11185	1760651	T/C	ACGGATGACAGACGACGCACAA	AGTCACCTGAGATTTAGCTCAA	three_prime_UTR
SNP10368794	scaffold11185	1799729	T/C	CAATTACCTGTCACATCCATCT	ACTTCTGTATCCATTGTCGACA	exon
SNP10369565	scaffold11185	1872141	A/G	GCAGGTCTGAGAGAAAATCAAG	TCTCCGGTCCAACCAACTTTAC	exon
SNP10369706	scaffold11185	1907144	T/C	CATTCCTTCAATTGTCCAAGCA	AAACTCTCGCAGAAGATATGCA	exon
SNP1039115	scaffold6459	444804	G/T	CTCCAATGGTATGGCCTGGACA	CCACAGGACTATGTACTTCATC	exon
SNP1039342	scaffold6459	469526	G/C	TGTACGTCGACATAATGGACGG	TCGTACGGTGGAACTCGGTTAC	exon
SNP1039460	scaffold6459	489432	G/C	TCTTGTCCCAGCTGCCTGTCAT	AGCTGTAGTTGGGTGCCTTAAT	exon
SNP1041283	scaffold6505	68024	A/C	TGTACATGGAGTTAACCACACC	ACATCAACGTCTGTCAGGTACT	exon
SNP1041635	scaffold6505	131334	C/T	GAACTCGGTCGTCTACTATTGT	ACACAGTGACCGTTGCCAACAG	intron
SNP1042505	scaffold6505	293610	C/T	CTGTGGTGGGAATGTTGGTGTT	AGTTCTGGTTCTGGTATCCTCT	exon
SNP1042639	scaffold6505	306168	T/A	AGTGGACAGAAGATTGAGGACT	AGGAGGACCAAGTTAATCAACA	exon
SNP1043023	scaffold6505	376308	C/T	TCGGAAGCCGTTTTCCTTTGTA	GAGCTCTGATAGACGTGGTCGC	exon
SNP1043850	scaffold6505	517883	A/C	GCACTGTATCACATGCTGCCAT	CAAAAGACACATGCGAGTCACA	exon
SNP1044665	scaffold6505	676848	G/T	CACATGACGTGAACCATACATG	GGTATGGAATGTACATGGTGCA	intron
SNP1045330	scaffold6505	894607	G/A	TTCAGCTCTCTTTTCCATACGT	ATCTTCCCCTGGACGATGTGTA	exon
SNP1046349	scaffold6505	1045148	C/T	CACCTCAAAAGTCGGACCTGTT	AGGACAAGGTCAGTATACATGT	exon
SNP1046727	scaffold6505	1081951	A/G	TGGAATTCTGGAGCCTCCTGTA	GTCAGACCGGGGTGAGTGTCAA	exon
SNP1047225	scaffold6505	1156704	T/A	CATGACGCTTACCTGTTTACAA	TAGGGACAACACCATGATGCCG	intron
SNP1047952	scaffold6505	1248358	A/G	GCGCCCCTTTTGTTTTGTAGGG	TTTATTACACTGACCCTGATGG	intron
SNP10479552	scaffold715519	4612	C/A	AAGCTGTAGCTCAAACTACGGC	TGGTGAGAAGTCTTGCAGACTC	exon
SNP1048072	scaffold6505	1283444	A/G	CAATTCATTCATACGAGCAGTC	GCCCTTACAACCACACACGACC	three_prime_UTR
SNP1048619	scaffold6505	1460490	A/C	ACGATCGTGAAGGTTACTAGCT	TCCTCGCTATTTACCGGCCTCC	intron
SNP1049033	scaffold6505	1562032	T/A	GAATCAGGATTCAGGAGGTCAA	TCCCAGGGGTACGTTGGATTGT	three_prime_UTR
SNP1049107	scaffold6505	1582547	A/G	GCATGTTCCATCGGTCTTACAT	GGATGCTGACCGAAATGGAGTT	intron
SNP1049521	scaffold6523	65919	T/G	CACGGAGTAAGCGGAGTGAGAT	GGAGTACACGAATTAGCCGAGT	exon
SNP1049939	scaffold6523	199651	C/T	GACAGCCACGTGCCAAATAGAA	TCCACGAAGGAGAAAGTCTTCC	exon
SNP105035	scaffold523	996406	C/T	CCCTTCTTCAGAGAAATTGGGG	GAATGGGCCGAATATAACCTTT	intron
SNP1050804	scaffold6523	477621	C/G	TGAGTACAGGACACTACAGGAG	CCTCAAGGTCACAGCACAGCTG	exon
SNP10512076	scaffold715899	15865	C/T	TAATAGCCTTACCCAAGACCAA	ACCTCCTGGTCGTAGAAAACTG	exon
SNP10512257	scaffold715899	32390	A/G	GACCTACCCTCTCCTGGTTGAT	CCAGGAACACGCTGTACTGTTT	exon
SNP10518628	scaffold715939	45318	C/T	TTGGCGTAAGTACTCTAGCCTC	CCCTTCTGTTGAGGACTGTAGG	exon
SNP10522117	scaffold715959	81829	A/G	TCTACGCTTTCTTTGCGTTGGC	GCTAGGCCACCGTCTTTTATAG	intron
SNP10522529	scaffold715961	80678	T/G	ACCGAGCTTCATGTACCATGTG	CGGCAAGTCTAGCTAGCAGACA	exon
SNP1052256	scaffold6579	45930	G/A	GCTTAAAATCTGACAAGTTGGG	CGAAACCAGCTAAGCCTGTCGG	intron
SNP10524876	scaffold715973	48736	C/T	TCGTGTACCCGAAATCTCGTAA	ACCAGGAACTCTAGTTCCAACG	intron
SNP10524960	scaffold715973	80082	T/C	ACCAAGTAGTGGCCATGAGTGT	TGTCCCACATGTGTCCTAGTCA	exon
SNP105367	scaffold523	1132235	G/A	TACTTGAGGAGGCAGCCTGGTC	TGGTCACTGTTCCACCCAATCG	exon
SNP1054372	scaffold6579	371067	C/T	ATTATCAAGTGGCCTGGGAGTT	GGGCCCCACAGGTCTAAGAAAG	intron
SNP1054446	scaffold6579	392289	A/T	CCTGCCATCCCGTATGATTTTG	TCCCGTCTGTGACAGATCTACA	exon
SNP10547843	scaffold716061	40955	G/T	TCGGAGATTCTGTGGAAACCCT	CCCCTACACTGTCCTCCACTTG	exon
SNP10548262	scaffold716061	123905	A/G	AGCGGAAACTTTACAATGCTGT	CTAAGTTCAGGACAATCTCCGC	exon
SNP10549485	scaffold716065	26957	A/C	ATGTGGAAGTGGTCATTTGGCT	ATCGGAAGGGCATTCACGTTAA	exon
SNP1055821	scaffold6595	324748	T/C	TTTGGGTGTCAACATCTGAAGC	TTTCATCACCAGTACTTTTGCC	intron
SNP10559617	scaffold716095	23244	G/A	GACATCTTTTGATCAAATCGGC	GGGGTTCAGAATCAAACCGGAA	exon
SNP10560860	scaffold716095	115884	C/T	CCCTACTACAGTTCTCATCACA	CCAACACAAAGTTCGACAACTC	exon
SNP1056431	scaffold6595	433508	T/C	CTGAATTCCGTCACCTGCCCAT	CCGACACTTTCATCAAATACAG	exon
SNP1056699	scaffold6595	486690	T/G	CACTCTGTGTGTTGCCGTCCAT	AGTGAGCTGACATCGTGAACTT	exon
SNP10572204	scaffold716115	108223	C/T	ACTTCGTCCTCGACCAGAAGAA	CACTGTTGGAAGCTTATGACAA	exon
SNP1057975	scaffold6615	88086	T/C	TCTCTCTTGGTCACCATGTCAC	CTCTATTGGTACAACCATGACC	intron
SNP1058632	scaffold6625	114509	A/G	TATGCGAGAAAACCGACGTGTC	ACCTCGGTCGGCATTCAGTGAA	exon
SNP10591150	scaffold716143	149240	G/T	TTTTGATACGTCCGCAAGTTTG	AGGGATACCATAAAATGGCGCC	intron
SNP10593999	scaffold716149	69263	G/A	CCTCTGAGTAAACAGGGTCGCG	TGTCTTTACTTCCGTCCGCAAA	intron
SNP10594292	scaffold716149	148369	T/A	CTGTCGTATTGGCCTACCTCAT	CCAGGTACCAGGTGAGAATTAA	exon
SNP105988	scaffold523	1386616	C/T	GATTACCTGGAGAAACAGCTGA	CTGACTGGTGACATTAAAGACA	exon
SNP1059926	scaffold6625	334097	C/T	TCTCCCCTCACCTCAGCTGACA	AAACCTACAACACTCTGGAGGT	three_prime_UTR
SNP1060933	scaffold6625	540588	A/G	TGCAGAACCGTCACCTGATGGT	TAGGTGGAGGCTGGGATACACT	intron
SNP1060954	scaffold6625	548697	C/G	ACCCATCAGGGAACAAATATGG	AGAGATACCAGGAGAGTTGATT	intron
SNP10619153	scaffold716183	228766	C/A	GCTTCTGGTATGGTGGATGTGA	ATGGCAATCGATTCAGCACAGA	exon
SNP106225	scaffold523	1486546	A/G	CGTTAGCTTCGGTCTGAAGGGA	TGTTTGATATCTGACACTCCCC	intron
SNP10623454	scaffold716191	172586	G/A	TAACATGTCTGTGGCCGCACAC	CTAACAGTGTGAAGGAATCTGT	three_prime_UTR
SNP1062598	scaffold6647	138664	T/C	GTAAACCGAACGACAGGAAAGT	ACGGCGATATTGTTACTCTGCA	exon
SNP10626690	scaffold716193	248576	G/A	TTTCAGGTCGTGTTGCAGTTCC	CCAGATTTGACCATCTTTGTCA	exon
SNP1062832	scaffold6647	168717	C/A	TTCCATCCAGGTTTCCACCAAC	GTTCGACGAAAGGTCCTCCCAA	intron
SNP1062834	scaffold6647	168825	A/G	CTTGGTCGAATATACCACCACC	CGTCGATGAATCCACCGTGGTT	intron
SNP1062835	scaffold6647	168867	A/G	CGTGGTTTTCAAATCCGCCGTT	CGAGATCAGATGGACCTCCAAG	intron
SNP1062866	scaffold6647	171806	C/T	AATGAAAAGGTTCCTGCCTCTG	ACGTCCTCTAAAGTCGTGTTCC	exon
SNP10631563	scaffold716201	112401	G/A	CTGACAAACTTCCAAACCTAGA	GATCGTGTAACTCCAACTGTTC	exon
SNP10634951	scaffold716205	118117	T/C	GCATCACGATAAATCCCTCAAT	GCTGTTTGCCAAGGATAAACAT	exon
SNP10646796	scaffold716215	139649	T/A	GTTAGCCACTTGTAATGCTGCC	CGCCACAGTTAGAGGCTGACCA	intron
SNP106505	scaffold523	1528430	C/G	GAGTCTGGAGGCTGTAGCGGTA	ACAGGGGCCATGTTACCGTATC	exon
SNP10651394	scaffold716223	204413	G/T	AGGAAATTAAGGAGCATGAGGT	ACAAGGATGAGGACGACAAGGA	intron
SNP10656960	scaffold716229	70525	T/C	ACAAAGACTGTGTCAGAAAGAC	TAAGTTATGGGTGAACACTTGG	exon
SNP10678582	scaffold716249	207355	C/T	GTATGGTAAGTTTCTTGGCCAC	CATGCTTGCTAAGCCACATCTT	exon
SNP10679041	scaffold716249	296905	T/G	TCTTTGGTCAGTGGAATACCCT	TAAAGGGTGATGTCCTGTACAG	intron
SNP1069238	scaffold6647	1351063	A/C	TTGTCCTGGTTTGTTTTGTGGT	CCGCCTTAGTCATCAAACGGAG	exon
SNP10697011	scaffold716261	92478	C/T	CAGTCAGCACTCACTGGAGTGT	TCAAGACGGTCTTTAGGTGGTA	exon
SNP10697422	scaffold716261	139053	T/C	GTGGAACTCATGTGTCCAATCT	ACCTACAGGTGAGTTAGGCTAA	exon
SNP10697627	scaffold716261	157676	C/A	CAGATACCTGCCACACCTAGAC	TCATGTCTAACTATCCACCGAT	exon
SNP10698193	scaffold716261	271669	T/A	TGATCTTAGTCCTCAAAAGGCA	GTCAAAGCGATGGAGTGAAACA	intron
SNP10698302	scaffold716261	281713	C/A	TTTCCCAAATCAGTACTGTGCT	TGTTGAATGCCGTGTACATCTA	three_prime_UTR
SNP10698511	scaffold716261	410758	A/G	CGATACCCCTTAGACACTGTAC	CCCTTTCTACAAGAGTTGAAGG	intron
SNP1070587	scaffold6647	1579412	C/T	CCTACCTTCCAACTCCCCTAAA	ACTTTTAATCTTGCTCCGTGCT	five_prime_UTR
SNP1070687	scaffold6647	1616957	G/A	CCGTAGGAAATGCAGCAGAAAA	CAGATGCAGTAGGAAAAGTTGG	intron
SNP10718607	scaffold716273	300860	G/T	AATCTAATCTGGATGGGCTGCG	GTATCTCCACACTCTTCCTTCA	exon
SNP10721876	scaffold716275	142490	T/C	TCCCGACAAGAGTGACGTCAGG	AGACACCAATCCTTAGAACAGG	exon
SNP10724560	scaffold716275	416798	A/T	TCAAGGGTGTTATTGCCTCCTG	CAATCAACAGGAACGCCATCCG	intron
SNP10724881	scaffold716275	449178	C/T	ATCGTGAGGATGTCTTATTGGC	TCGGCTCCTGTGTCCTCTCCTT	exon
SNP10726972	scaffold716277	476012	A/T	CAGACACCTCCATCACTTTCGA	TTACACATATAGCCGTGTCAAG	three_prime_UTR
SNP10727216	scaffold716277	515687	A/T	TAGGATGACAGGCGACACAAGT	CGGGAAAGGTGAACCTGTAAAT	exon
SNP10727753	scaffold716279	25973	T/C	AAGATGTGAGTAGGGTAGGACG	TGCAGAGTTGTGCTCCCTTCTA	intron
SNP10730172	scaffold716279	466557	A/G	CAAACATGTCCTCTATGAGCTG	AGACAAGGTCACACTCGACTGG	exon
SNP10730940	scaffold716281	194658	G/C	TAACAGGCTGGGTTCGTTAAAG	TGTTGGAGTTAGAACCAATACC	intron
SNP10731005	scaffold716281	217391	T/C	CGCTCCTAGCTTCTTGGTGTTC	TGGTCTGAGGATGGACTAACTT	intron
SNP1073172	scaffold6687	13200	A/T	ATTTGTAGACTGGTCGAAGACG	ATGTGGACACAACTAATCGTAG	exon
SNP10733354	scaffold716281	534651	G/A	TGTTTGTCCGACAGAGGACACC	GACTTGACATGCTGGACGTGTT	intron
SNP10735914	scaffold716285	36110	A/G	TAAATCATATTCCGCTGCCATC	TCATGAAGGAACACTCGGGGCA	exon
SNP10739690	scaffold716285	450890	A/G	ATCCATGCATGAACGGAGGCAC	TAGAGGGATATTCCGGCTACAC	exon
SNP1074049	scaffold6697	38762	T/C	ACCGTTGTTACTGGGCCAAAAG	TTTGCGGTACTAAAGCACCTCA	intron
SNP10742660	scaffold716289	97867	A/T	GGGGTCAGGCTCTCACCGTTAT	ACGACTGTAAACTGCTAGACGG	intron
SNP10742784	scaffold716289	110557	G/A	TGTCGCCTTGGGTCGACAATTC	AAAGGACATCGCCACTGTTTAC	intron
SNP1074479	scaffold6697	202116	A/G	CTGATTCTGACATGTCCTCTCC	TGTTGATTCTGGCCATACGTGT	intron
SNP10745858	scaffold716289	498189	A/T	TTGGCATGTCAAACACTATGGT	GTAGCGAAACCTCTAGGGTTAA	three_prime_UTR
SNP10746782	scaffold716289	570584	A/G	CAATGGCTTCAACAACGGATTC	TAACCAGTTCGCTGGAGGATTC	five_prime_UTR
SNP10747242	scaffold716291	18945	G/A	TAAGCCGGTACAGCTCACTTAC	TCCAATCCGTTACTTTCGCGCC	exon
SNP10747779	scaffold716291	127363	T/A	TAGCATTCACTACCACCTGTGT	TACACCTCCACCAACATGTTAG	intron
SNP10748033	scaffold716291	210422	C/T	TGTGATGGAAGTCACCTTGTCA	ACAGATGACCTATCACCCTTGA	three_prime_UTR
SNP10748128	scaffold716291	229461	A/C	CCCGAGTGATAAATTGCACATG	AAATGACTGGGGCCAGTTATAA	three_prime_UTR
SNP1076523	scaffold6727	173110	C/A	GAAATGCCCAGCATGTCTTTTC	GATTGACCCCAGCATATAATGA	intron
SNP1077268	scaffold6731	49376	C/T	TCATGCAGGACCAACCTGAATA	CTCAGCAGCAACATACAAACCA	three_prime_UTR
SNP1077397	scaffold6731	73370	T/C	TTCTCTGCTTTGTCTGGTTCAC	TAATCTGCCAGCGTCTTAGCTT	exon
SNP10780112	scaffold716309	555628	A/G	CATATCCCACAATCACAGAGGA	ATGTAGATACGACAGCGCCATC	exon
SNP10782282	scaffold716311	282762	T/G	GCCCGACTAACTACCCCTGTAG	TTTGGAACTGATTACTTGCCCT	intron
SNP10787771	scaffold716313	283841	T/C	CTGTCGCATAAATCATGTCGTC	GATGCGTTAGCTGTTAATCAAC	intron
SNP10788808	scaffold716313	543774	A/G	CATCCGCTGTCCTTTCGGTTTT	CGCCGATTCCTTCATCAATTTC	intron
SNP10789429	scaffold716313	621240	C/T	ACCTACTTTTGGTAGTGCTGCG	ATTTGTCGCTCCACAGAACAAA	exon
SNP10789651	scaffold716313	682398	G/A	AGGCTGCTATGTCCCAGTAAGT	AAGTATCTCCGTTTGCGATTCC	intron
SNP10789814	scaffold716313	706840	C/T	ACACATGAGAATCCCACGAAAC	CTGTGAGTGGTTCAATGAAGGT	three_prime_UTR
SNP10790006	scaffold716313	719660	C/T	TCTTCATCGAGATGTGAGTCGC	TCGATGCCTGGAACATGTCCTT	exon
SNP10790079	scaffold716313	729953	T/C	CACAGGAAAGCACAAGCGTGAT	GGACACTGTAGCTAACAAGCTG	intron
SNP10790252	scaffold716313	742095	T/A	CTCTGCTGTATCTGTAGCCCCG	AAATGTTGATCGACGTCACTTC	intron
SNP1080104	scaffold6779	473497	C/A	GGGTAGTTAGGAGCCTACCTTT	TGTAGTTGAGGGAGTCAGGGAA	exon
SNP10803526	scaffold716319	187262	T/C	TCACAGTGTCAACTCTGCCATT	GTGTTGGAAACAGTGGTACTGG	exon
SNP1080406	scaffold6779	660291	A/G	ACTCTTCGGTCACGAGCCGAAC	GCCACTAGACTACCATGCCTTC	intron
SNP10806804	scaffold716321	9043	T/A	ACACTTCAACGTGTTCGTCTTT	CAGAACCGTATGGAAGAAAGTA	exon
SNP1080962	scaffold6779	917024	G/C	ATGGAGAAGATCTGGCACCACA	TATAACGAGCTTCGTGTGGCTC	intron
SNP10809720	scaffold716321	646583	T/C	GTATAGTGGCGACACTTCCTGC	TGTAGTTCCAGCAGCCACCCAG	exon
SNP10811260	scaffold716323	140216	T/C	ACGAAATGCACGACCTGCAGAG	TTAAGTGTGGCAACTACTGTGT	exon
SNP1081318	scaffold6779	1019059	T/C	AGGCAAACTGGTGAATGACATT	CAACTTCATAGCAACGGTTTAC	exon
SNP10814519	scaffold716325	147586	G/T	GTAACCTCCGGTGGGAAGTGTT	TATGTGTTCCTTGACTGTCCGA	three_prime_UTR
SNP10838081	scaffold716335	60834	A/G	TGAAACAAGCCGTACAGCAAAC	GACCAAAACAGGAATAACAGCA	intron
SNP10838742	scaffold716335	105773	T/C	CGATACACGGGCTTATATACAA	TGAAGCTGTTCATGGAGATGAA	exon
SNP10839055	scaffold716335	128775	C/T	GGGTCTGTGAAACTCGTCCCTG	GCTTCATCATGGTTTGGATTGG	exon
SNP10839241	scaffold716335	157251	C/T	ATCCGAGATCAGGTTGGGAACT	CTCGTGAATCACTTTCTGGTTT	exon
SNP10843081	scaffold716335	740172	A/C	ACATCTCCGCCTTTGGTGATAG	TTGCGTGAGTCACGAAGCTGGA	exon
SNP10843541	scaffold716335	809189	C/T	GCTTCGGTAGTAAACGAAGTTA	GCCGAAATCTATCAACACACAA	intron
SNP10843721	scaffold716335	820306	G/C	CTTTGACACCAGGGACTCGTTC	TACTCCTCATCAGCATGGACAC	exon
SNP1084980	scaffold6857	30210	C/T	CCACTAATCGTCCACAAAGAAT	GTGCCGCCATTTTCCTACAATA	intron
SNP1085226	scaffold6857	106751	T/C	TCCAGATCTGGGTTGACTCGGT	TGCTGCTGCTGGAATCTGTAAA	exon
SNP10880301	scaffold716347	361870	A/T	GTGGCTGAGAGTGGCAAGAAAG	GAACCGAACAGGCATAGGAGGA	intron
SNP1090108	scaffold6893	221512	C/T	TGAACCTTCCCGCTGTCTTTCT	TGTTCTGTGGTGCGTACAGCGA	intron
SNP1090838	scaffold6893	270515	T/A	GTCGTAAAATTTGAGCCAGTTC	CTCCTCATTAGTATGTAGGGGT	exon
SNP1090847	scaffold6893	270897	A/G	TTTCCTCTCCGGTCCTCTTTCC	TCACCTCTAACACCTGACAGGA	exon
SNP1090861	scaffold6893	273063	G/C	CCATCAGATTAAACTCCGGACA	GTTTCTCCAGGACACAGGCATT	exon
SNP10910852	scaffold716355	808474	G/A	GGTACTCTCGTTCTGCTTGCAT	GGATAAATTCCTCATCCTCACG	intron
SNP1091363	scaffold6893	305677	G/A	CAGACGGAACAGACAGACATGG	CTATCAGAATATAGGCGGGAAC	exon
SNP1091581	scaffold6893	321077	A/C	ATACTCACCACCGAAAGTCAAA	ACTTGTTCATCCACTTGTGATG	exon
SNP1092478	scaffold6893	406214	C/G	GATCAAGGAGTACTCCGAGGTG	AGAGGTACGCCATCAACATCCT	exon
SNP1094284	scaffold6893	525702	G/A	AGTACGAGCCAACAGACCGGAA	TGTATCTCCCGTCTGTCATCAT	five_prime_UTR
SNP1094767	scaffold6893	566773	T/C	ATGTCTTTGGGGATGGAGAGCG	TTGTTCTGGTTTTACCAAGCTG	exon
SNP1095428	scaffold6893	616009	C/G	CCTGGTCGAGGACATTCTGTAG	TTTTAGAGAACGGCAGCTCCAG	exon
SNP1097893	scaffold6893	824897	A/G	AAAGCACCACTCTTTTACTGTC	GCATCTGCATTAGAAGGTCATA	exon
SNP1099082	scaffold6893	905126	T/A	TACAGACACCGCGGGACACATC	CTCACATACTTGTCTTCCCAAC	exon
SNP109922	scaffold603	98821	C/G	CAGTGTGTAGTCCTGACAGCTG	GGAGATCTATGACTTGGTGGAA	intron
SNP1099692	scaffold6893	950062	G/A	ATAGTCCTGTGTCCTGGATACA	ATGGTCACATGTATATGGGACA	exon
SNP10998425	scaffold8653.2	283327	T/G	CGCCCTGTGTATCAAGTCATTT	ACTTGAAAAGGCTGACCAGTGA	intron
SNP10998795	scaffold8653.2	358075	T/G	CACGAGTACACGACAATGGAAT	ATTCCAAAACTAGGTCACTGTG	intron
SNP1100571	scaffold6893	1021749	T/C	GAAAACCGCCATCAGCAGCATA	GTGATGTAAGTAATCCGAGTGT	exon
SNP11017	scaffold83	34285	T/C	AAATCTCACCTAGGCCTCCATT	AAGCACTTTCGTTTTGACTCTC	intron
SNP1102814	scaffold6967	40032	A/G	AGACACCTGAAGGGTTACAAAA	TTCGTGAGTATGGTTCTGTAGT	intron
SNP1103253	scaffold6967	241894	A/C	CCGATTGTTATCAGCTGTAGCT	CACTGTCCGTATCCACATCCCG	intron
SNP110338	scaffold603	166234	T/C	CATCTGTCTGTTTTGGTATCCT	TCGCTAATGGTGAGTAAAACCA	exon
SNP110374	scaffold603	183057	T/A	GAATACCAACTACTCGGTACGA	CCTCACTACTGGAAGACCCTAC	exon
SNP1103743	scaffold6967	373043	T/C	GTGTTAGGGAAATGTGTACCAC	TCTAATTGAGGATGTAACGCCC	three_prime_UTR
SNP1103826	scaffold6967	407217	C/A	CCGCCTGGTTGATTTGTACCGG	GCGAAGCTACACTCACCACAAA	five_prime_UTR
SNP1103924	scaffold6967	415732	T/G	ACAACAAAATGGCGTCGTCTGT	GAAGGAACAAGGCGTACGGGAA	five_prime_UTR
SNP1104387	scaffold6967	459413	C/T	ACAGCACGGAAAATGCCCTGAC	CTCCTCCGAGGGAATTGATAGC	intron
SNP1105678	scaffold6967	588603	G/A	TTGCAGGAACTGAGAGTGAACC	TAGTGACACTCCCTAACCAGGA	exon
SNP1110019	scaffold6999	49196	G/T	TCACAGATGAGTATGCTGACCC	TCAGCACCTTCATATGGGCAGT	exon
SNP1110392	scaffold7007	39970	T/G	ATATCGTTCCGGTCAGATTACT	GAAAGGTCATCCCTATTCCCAC	exon
SNP1111077	scaffold7015	56324	C/T	ATAGTAACCTTAATGGGCGCTA	TTGGCATGGTCTGGTACAACTA	intron
SNP1111321	scaffold7015	165779	T/G	TCGCAACTCTCAAGTTATCAGA	AACTCAGGCAGTCAAACGTGCA	five_prime_UTR
SNP1111391	scaffold7015	217010	T/C	TACACCGTGCTTCTTGTTCCTG	CCATCATCTCCCCAGGCAAATG	exon
SNP1111565	scaffold7015	365539	T/C	AGGTGAAGCGTGGTAACCTTGA	CAGAGGTCACCAAAGCTCAAGA	exon
SNP1112488	scaffold7021	195390	G/A	GGAACTTTGCCGATGTTCTGAG	AAAATAGATGGAGTTGCGGTCA	exon
SNP1112686	scaffold7021	244106	A/C	GAGCGACAAGAACGATGGCCTG	GAAAATTGAGGAGCTCACAGCA	exon
SNP1113336	scaffold7021	347244	A/C	ACAGCTTCACCGACAGCTAGGG	AGATGTCTTTGAGGGTTACCAA	exon
SNP1113455	scaffold7021	354909	T/C	CGGGCAGTATCCACTCAATAGC	CTTTGTTGCTGTTCCTCAAGTG	exon
SNP1116628	scaffold7021	1047818	C/T	TTGAATCCCATTCGGCATGCTC	TTGCCCATTGTCTGTCATAGTC	intron
SNP1116763	scaffold7021	1070718	G/A	TAGAGTACCGCAGGAATGAAAC	ACACCTGCCCAATGCTAGCATG	intron
SNP1116990	scaffold7055	1459	C/T	TGCACATCATTTAATGAGGGCA	CAATATTGGCATTGATCGCAAC	five_prime_UTR
SNP1117007	scaffold7055	13772	C/T	ACGAGGCAGGTCTTAAACGTCA	CGTCCCATGCAGAAGTTGAAGA	five_prime_UTR
SNP1118236	scaffold7055	545523	C/T	CTGCCAAATGTAGAGGAGAGTT	AGTTATCCACCTCATTGACGAG	exon
SNP1118380	scaffold7055	576472	T/G	TGTTGGGCCAGAATTCCTTGAC	TTCTCTCGAGTGATCAAACTGC	intron
SNP1118612	scaffold7055	633867	C/T	TTATTAGGGAGGTGGCGCTATC	CTAGTATGTGACTGTCTGCTGG	exon
SNP1123231	scaffold7087	157175	C/T	CCATCAACAACGAAACCACGCT	GGTCCTATACCTAGCGATAGTT	intron
SNP1123929	scaffold7087	361420	C/T	TACTTCACCACACACAGTGCAA	GATCTGACGCCTTGTGTCGTCC	intron
SNP1123964	scaffold7087	379171	A/T	TTTGCCGTATGCTTGAACCATT	TGCCATTCCAATCGAGCTGTGT	three_prime_UTR
SNP1124031	scaffold7087	399719	G/A	GGTTCCAGCGCACCTGATACAC	TGTTATGGGCGAGGTTGGTGTC	exon
SNP1124223	scaffold7087	448477	T/C	CACAGGCTGACATAAATAAGGC	AAGCTGCCAAGGCCGCATTTAA	exon
SNP1125613	scaffold7087	602223	C/G	TCGAACTGGGTGAATTCGATGA	AGGAGCTTAAACTTGCCATGGG	exon
SNP1127084	scaffold7087	788256	C/T	AGCAGAAGAAGGGAACAATAGA	GGTGGCTGTTTGATGACGGAGG	exon
SNP1127218	scaffold7087	823382	C/A	TTCGCCTATCAGTGAATCTGAC	ACCAGCACATTGAAAACAGCAC	intron
SNP1128217	scaffold7087	1027651	C/T	ATAGACAACTTCTTACCATGCG	GACTTAACAACCGTCGCCGACG	exon
SNP112980	scaffold617	8439	C/T	AGTCGCTTAGGCTTGGCTTCAC	GTAAGTGTGGTCGCTGGGCAAC	exon
SNP1131803	scaffold7141	237833	A/G	GAAAGTTGTCGGCCCATATATG	ATCAGGTAGATGGTATTCGTGT	three_prime_UTR
SNP11319333	scaffold2329	6238641	C/T	ATTGTCCAATACCAGGGTTACT	CCAATCAGAGGACCCCAGAATA	intron
SNP1131948	scaffold7147	20749	T/C	AAGAGAGGTACACTTTGGTCTG	TACCACTTCGTATGCTCTGCTG	intron
SNP1132316	scaffold7147	88531	G/A	CTGCGACACTCTGAAGAATATT	CCCCACCACTGTAGATAGCACA	five_prime_UTR
SNP1133394	scaffold7147	397881	A/G	ACTTCGTGGCTTTACTGGTCAG	TCTCACAGAAATCCTTCCAGGC	three_prime_UTR
SNP1134045	scaffold7147	542350	T/C	CAGTCCTCACGGATAATTGACT	ATTGTCGTTAACTCACAGTACG	intron
SNP1134316	scaffold7147	598825	C/G	GCCCCACTGGTATCATGGCATC	GTACGCTTACCGAAATCACTAT	exon
SNP1135486	scaffold7149	32918	G/T	GCTCCTCATCCTGGATGGTACT	GGCGACGAACAATATTGGATGC	three_prime_UTR
SNP1136804	scaffold7191	10137	G/T	ACTCTGTCTGCAGAGGTGACAA	CTGTATTTCTCCCTTGTGCTAG	exon
SNP1137206	scaffold7201	165715	A/G	ATCCAGGACAGTCAATAACTCC	AGACTAAACCCCGGAATCTACC	three_prime_UTR
SNP1137218	scaffold7201	176372	T/C	TTTGACCTCTGACCCTGAAATA	CACTGGTGATCTTGTCCTTCGA	intron
SNP1137268	scaffold7201	204563	T/C	TTAGGTCAGTGATTTCCCTGTC	TGTCCAGCAGGATTTTCTGATC	intron
SNP1137535	scaffold7201	312685	A/G	AGATGGTGGAAAGATGGATTTG	TGGCTTCAGGTGGAATGCATCT	intron
SNP1137574	scaffold7201	317247	A/G	TTGGCGGCTCAATATTCCACGG	CGGGATATAGAAATGCTGCAAA	exon
SNP1137825	scaffold7201	435181	T/C	GCCAATCAAGAGCCCTTCACTT	ATCTACATGCCATTCTGCGATC	intron
SNP1138806	scaffold7201	655918	C/T	CTTTATCACACAGTGCCCAATA	AGGACAGTCCTTCAGGTTTGAC	intron
SNP1139358	scaffold7201	779642	A/G	GACTGTTCCATCAATGTCGTCC	GGCTACCACAACACTTCTGTCA	exon
SNP1139615	scaffold7201	799281	A/G	ATAGAAACTTACCTGCTCGAAC	CGTTTTCAAGGATAACCCTGTT	exon
SNP1139939	scaffold7205	49860	G/A	TGACGGTAGCGACGATTACGAT	TGATAACTGTAAGAGCGGAAAG	intron
SNP1140269	scaffold7205	153394	C/A	ACGTGACGGTGAGGATGTATCC	GCCTAGTGACGGTAGACGTGCA	exon
SNP1142139	scaffold7205	511385	T/C	TTGGCCGAGCGTTAACAATACT	CCACCGAAAGAGAAAAGACAGA	five_prime_UTR
SNP1142689	scaffold7225	30994	A/C	ACCGACAATGGTAGATATGGTA	CAGCTGGAAACGTCCTGCTTTA	intron
SNP1142748	scaffold7225	49629	C/T	GTGTGGAAAATGGTTCACAATG	TCAATGAAACAACTGGTACCGT	intron
SNP1143302	scaffold7225	237017	T/C	CTGTTTACGAGGCAGTTAAAAC	TAAAGCTAGATTAGCAGAGCCA	five_prime_UTR
SNP1143852	scaffold7225	458230	C/T	ACCGACTTCCGGTGTATGTTTT	CACATTCTCCTTGCTGTGTATA	three_prime_UTR
SNP1144545	scaffold7225	587889	A/G	TGGTAGTTATCCGAATGGAACT	TGGTACTCGACCGAATCACACT	intron
SNP1146303	scaffold7251	52405	A/G	GTGTGCCTTTACATCTACCTCG	TATGCAGGTCGCTATGCACTGT	exon
SNP1147064	scaffold7251	254982	A/G	TACCTGTTACGAACTGGTACAA	TGTGGTTCAGCGTCACCACTGT	exon
SNP1149016	scaffold7269	103180	T/C	GTTCGGTTACCTTGGCGACAGA	CCGGAAGTACCTGATGGTGGTC	exon
SNP1149446	scaffold7269	136191	T/A	ACTGCCAGACTTCCGCTCTGTC	CTAAACTGGGAACCAGAGAGGG	intron
SNP1150236	scaffold7269	290862	A/C	GGTCAGCTTGGTCCATAATCTC	CGTAGGGGTAGTGGGAGGTTCT	exon
SNP1150656	scaffold7269	458523	G/A	CATGTTTTGGCCAAGGTGACTC	GTTTAGTAAGTGTGCCTACACC	three_prime_UTR
SNP1151694	scaffold7269	632912	C/T	TGCTCCATCTCAAGGCAGACCG	TCATGTTACGTCCAGGTAAGAC	exon
SNP1151961	scaffold7269	668500	T/A	TTTTCTACCTGTCAGCAATCCC	AACAGGAAGTAGTCAAACAGAC	exon
SNP115246	scaffold651	81158	T/A	TTGGTTATAACAGGAGCATGCA	GAAGTTTGAAGGTCCAAGGTGT	intron
SNP1153678	scaffold7283	802789	G/C	AGTCAGAGGTAAACTTTGGTGG	TGAGTTTGTAGCTCAGCTCCAA	exon
SNP1155557	scaffold7285	209626	G/T	CCCTTAGCTTCCTTTTGTCTTT	GCTTGCCTTTATGCAGGTGGTT	exon
SNP1156716	scaffold7307	195956	A/G	ACACCTGTCCGTTTAGACTGCT	GGAGATTGCGTATGTTTGTCTA	exon
SNP1158323	scaffold7325	305774	C/T	GCCGACATCCATCGCCAAATGA	AGCAGATCTTCCTGAATTGGTA	exon
SNP1160335	scaffold7333	315304	A/T	CCATCCCCTGCCAAGAGTTGAC	ATGTGTCTGCTTCTTTGGAAAC	exon
SNP1160400	scaffold7333	332452	A/G	TTTGTGGGTTCACCATTGTCAT	GGTTAACTTTACATTTGCCCTG	intron
SNP1160584	scaffold7333	353821	G/A	CCCAACTCCAACTGGTGGCATC	CAGATCACATAATCAAGACGCT	exon
SNP1161081	scaffold7349	117238	T/G	CTAGCAACCTGTTGTAAACCAG	CGCCAATATACTGTACATTTCG	three_prime_UTR
SNP11617853	scaffold4403	307644	G/T	TCTGGAAAAGTGCTCTAACCTG	CTGGTTCCTGCACCTCTTCAGT	exon
SNP1162328	scaffold7365	55538	T/G	TGACCTCCGTGACCTTCTCACG	GATCTGTGGAAACGGATGTGGA	exon
SNP116246	scaffold673	316653	A/G	ACTTGTCGTCCATGCTGACGTG	GGATACACAGGACTATCAGGCG	exon
SNP116302	scaffold673	394250	T/C	TAATGGCAGGGCCAAGACCAGA	AGCTCAGAAGCAGACAAAATTC	exon
SNP1163258	scaffold7441	27637	T/A	CGAAGTTCCAGTGAATATCGTT	AGAGCGGTTCTCCATTCGTAAA	intron
SNP1163259	scaffold7441	27952	C/T	GACGTACCTTCAGATAGACGTA	GATGTTGTAGAGCCCCATTTAC	exon
SNP1163463	scaffold7441	90289	G/C	GTGACGTCATGGCAAGACAGGT	AAAGGCCTAATCGGATTTGTCC	five_prime_UTR
SNP1165462	scaffold7441	574199	A/G	CTACACACATGACCCAATCCAA	CATCGTCCAGCTAGGATTCTCA	three_prime_UTR
SNP11659091	scaffold4553	281681	A/T	CCTAACCCCTGTATAGTGGCAG	CCTCACCTCATCCCTGTATAGT	three_prime_UTR
SNP1166062	scaffold7443	58554	T/G	ACCAGAACAAGATCACTCCGAA	GTTTCCATCATTTCCTCGTCCA	exon
SNP1166120	scaffold7443	74075	C/T	TCTTTATCACACTTGCCATGCC	TTCAGTGGGAGATTCACCCTGA	five_prime_UTR
SNP1166542	scaffold7443	192592	C/T	CCAGCTCGTGCTCATGAATACT	GATTCGGTGTTTTACAGCGTCT	intron
SNP116681	scaffold673	451513	T/A	GGGCCAAGATTCTGTTGGTGAT	AGAGTGTGACAACAGAACAGAG	exon
SNP11683186	scaffold4623	94604	A/G	ATGACAGCAATAGTGGTACAGG	ACAAAGCTGGTTTACCAGGGAC	intron
SNP1168690	scaffold7453	114973	A/G	TCAGCATTTCGTAGTTGAGGTC	ACTCGTAGGCTTGCCATGCTTC	exon
SNP1168852	scaffold7453	133069	T/G	ACACTACCCGTGTGTTTGTCCA	TAATGTTACACAAGGTTCCAGC	exon
SNP1169937	scaffold7453	229122	T/G	TGTCAGCTTTGATTCCGTGGAA	CTATCAGTTGGCCGACGGTCCT	exon
SNP1170666	scaffold7461	148166	T/G	TGTTCCGGTACTTCCTGTCAGA	CTTACCTACCATACGAGGTGGT	three_prime_UTR
SNP1171131	scaffold7461	258383	G/A	AACGTGCCTGTCCTCACTGACC	GTAATGGGTATTACCTTGACGT	exon
SNP1171163	scaffold7461	273768	C/G	TGTGGCTCAGTAGTTTGATGAA	TAAAAGCGTAACGATGACCGGC	exon
SNP1171778	scaffold7461	530176	A/C	TGGACGATTCGGACCCTGTAGG	AGATGACAGTACGTTGAATGTG	exon
SNP1171899	scaffold7461	547732	G/A	AGTTTTATCGTTCGAGAGAAGC	GAGCAAGCCTTTCAATGTCACA	intron
SNP1172121	scaffold7461	591909	G/A	TGACCTTTGGGACAGAATCTGG	GTTGTGTACACTTGACCAACAC	exon
SNP1172232	scaffold7461	607074	A/T	AACTTTGTGATAAGACCTTCCC	CCAGTGGGTTGAGGATTCATAT	intron
SNP11726647	scaffold4849	56368	T/C	TTGGTGCCCCTAAATTTCCTTA	GGTAGCCAAAATGAGGCGATGC	intron
SNP1172945	scaffold7467	49784	A/C	ACATCCCAGGATAAGAATTCGA	GAGTATTCCCCAGGTGAGTAGG	intron
SNP1173167	scaffold7473	32637	T/C	CTGGTGACTGGAACTTATGGAA	TGTGTGTGGAGTGTTGTCACTC	five_prime_UTR
SNP1173314	scaffold7473	113859	A/C	ACATCCCTGGCTTAGGTCAGCT	CTCAACCTCAGGCCTTCTAACA	intron
SNP1173502	scaffold7473	135089	A/T	CCTCTCTATCTAGTGGTAGTGC	CTGCCAAATCAAACATAACTGG	exon
SNP1175314	scaffold7473	894381	G/A	CACGCCCAAAGAAGATGAGAAG	CGTACGGAAATGTGGCTGTCAC	exon
SNP1175601	scaffold7473	975305	T/C	GGTTTGGCAGATACCATAGCAA	GTGGCATGGAGGCTTCATATTG	intron
SNP1175806	scaffold7473	1083726	T/C	ATACCCCTTTGTTGGCTCCTGA	CTGCCACGCTCCATCAAAGAAA	intron
SNP1176265	scaffold7473	1221260	T/C	CCTGTAGTTGATTCTGAAGGTC	GAAATCTCTCCCCTACCTACCC	intron
SNP1177865	scaffold7473	1539195	A/T	CAGCACAGGACTACATCAACAC	CAGACCTCAAAAGGTCAGTACA	exon
SNP1178133	scaffold7473	1560987	T/C	CTTTTCTGTTGTAGAATTCGGC	GGAGATTTCGCACTGTATTGTT	exon
SNP1178271	scaffold7473	1591851	T/C	CTACATGTGGTGTTTCTCTTGG	TACTTACACCACAATTCCCGCC	intron
SNP1179279	scaffold7473	1845363	A/C	ACATCAATGTCTGGTCGATATC	GCTACCAGATAGCTTCTCATGA	exon
SNP1179805	scaffold7473	1978658	G/A	TTCTCTCTGACAGGCGTAACGC	GTATCTCCTGGGAGGGAAGCAA	intron
SNP1180515	scaffold7473	2243984	T/C	TGACCAAAGAAATGCCTTCCAT	TGACGAAACCTGCTACCTGTTT	exon
SNP1181189	scaffold7473	2590154	T/G	CACAGATTCACACATACAGCTT	CCAACGATACATGCGGGTAAAT	three_prime_UTR
SNP1181310	scaffold7473	2619682	T/C	TGAAGAAAGGAGTGAAGATAGC	AGTGTATGGACGACTCGGTACA	exon
SNP1181351	scaffold7473	2627767	G/A	ACCTTGTCAAACTGTTGAGTAG	CAATCACATTTAGTCGTCCAGA	exon
SNP1181595	scaffold7473	2718684	A/G	CATTTCCGGTCATAACGGTATG	TAGCGACGGGTCACATGACCAA	exon
SNP1181854	scaffold7479	28593	G/T	TGTGCAAATCCCGGAGTGTGTG	AAGTACCAGACGTACACTAACA	intron
SNP1182099	scaffold7479	61993	A/G	GGACAATGCAACATTAGACAAG	AGGGGAAGATGATGAACTTACA	exon
SNP1182521	scaffold7479	147154	T/C	GTACACTTGCTGGCCCTATCTC	TTAGTCCGAATGCAAGGCCAGG	exon
SNP1183186	scaffold7479	246525	T/C	TCCCCAGGAGAAACAGGAAGGT	TCATAGGGCATGTCTTTGCTGT	intron
SNP1183432	scaffold7479	338187	A/C	GGAAATGTCTACCAAATGACGT	AAAATGCAGTATGACGCAATCG	intron
SNP1183863	scaffold7479	571172	A/T	AGTGTTGTAAGTGTGAGCTGTA	AGTGTCTAGTGATGTGTGTGTT	three_prime_UTR
SNP1184032	scaffold7479	643250	C/T	ACTGCCTATCCATTGTTTCAGG	CAGAACACGAAATCTGTTCGCA	exon
SNP1184251	scaffold7479	718834	C/T	GCAATAGTTCTCACAGAGGTAC	CCTCTAACCTGACTTTGAATGG	exon
SNP1184538	scaffold7479	809193	A/G	CCCACTTGCGCAACTGTTAATA	ATGTATCGACCTCCAGAGCGAA	intron
SNP11851528	scaffold5875	290573	T/C	CACAAACCTGACATTGTCGACG	CAATACATGGATGGGACAGGAT	exon
SNP1185447	scaffold7491	75539	A/G	CCTCATCACATTGGTTGTACAT	GTTGTGGACTGGTCCGGAGTGT	intron
SNP1185969	scaffold7491	131728	C/T	AGGAACTTCGTCATCACATACA	TAGGACAACGGTCTTTTGACAC	intron
SNP1186315	scaffold7491	198414	G/A	AGTGGAGGAACCAGGGAATCGC	AAGTACGAGAGGGGAGTTATGA	exon
SNP1187559	scaffold7491	343736	G/A	ATTTCCTACAGCGGATGGATGT	ATATCGTACAGAGCTCACAGAT	exon
SNP1188118	scaffold7491	481972	A/G	TGTCAAGGTCATCCACTCCTGC	CAGATACAGAAGACCCGGACCA	intron
SNP1188302	scaffold7491	511633	T/C	CGTGATTTTCTCGAGAACTCTT	GTCAAACACAGTGGCTTCACAC	exon
SNP1188437	scaffold7491	545155	T/C	ACATCAGCACAGCCCTGGAATA	CAGGTGCTCTAACCTGGTTATC	exon
SNP1188887	scaffold7491	606397	A/G	TTTTAGAGGAAGCCATGAAAGC	CACCATTTGCCCTATGGAACGG	exon
SNP1189358	scaffold7491	709308	A/G	TTGCAGCAGATGACTACTTGTT	CTGCTTCGGGAATACAAATGTT	exon
SNP1189537	scaffold7493	20945	T/C	AAACTTGCCATCACAGCCATAG	GTCTTTGATCTCTTTGCTTGGC	exon
SNP1190391	scaffold7493	233349	T/C	CAGTTCACCTGGCTGTGGTCAA	CCGCATGACACAACTGACCACC	intron
SNP1190418	scaffold7493	239532	G/A	CATCTAATACCAGGTCTGTGTC	TCTGTGGCCTTGACCGAGATCG	exon
SNP1190539	scaffold7493	262442	A/G	CCTTGGTGACATCATTGTTTCC	GTTTCAGTACATGGCGAGTAGC	exon
SNP1191152	scaffold7493	343167	A/T	TTGGATGGTCCTGCTGAGATAG	TATCAGACGAGTGATGTGTCTA	intron
SNP1192310	scaffold7493	709452	G/A	CCAAGGTCACCTCCGTTCAGCA	TTTTGTTAGGTGCAAGGAATCG	exon
SNP1192637	scaffold7493	763587	G/C	TTCCAACAGATATGCCTCTGAC	AGGAAGAGAAGGTACTCAAAGC	exon
SNP1194181	scaffold7493	964522	T/C	GCCTAGCTGTGTAAGTGGATGG	CCCAATCAAACACTAGAGGAGA	three_prime_UTR
SNP1194366	scaffold7493	985297	G/C	TTGGACTTACAAGGGAAAGCAG	ATAATTGCTAGTAGTGCGTCCC	exon
SNP1194422	scaffold7493	1018885	T/C	TCCACCAATACAAACAGGCTGC	TACAGCGTGCTTACGATCGCCT	exon
SNP1194842	scaffold7493	1181643	A/T	CTTCTGTTGACCATGTTCATCA	CTCAGTCGGTTAGAGGGAAAGT	five_prime_UTR
SNP119515	scaffold717	8432	A/C	GGGAACAAGATGGAGTTGATAA	TGACGTCATCATCAATAACGGA	exon
SNP1196870	scaffold7507	218273	A/G	AGTCTGGACTGCTGTCCGTGTA	GTTCAGCAGCATGTTTGACCAC	three_prime_UTR
SNP1196983	scaffold7507	227295	T/C	CCCCTTTTACTATCACCAGTAC	CTACTCTCCCCACTACTACTGC	three_prime_UTR
SNP1198536	scaffold7507	400677	T/A	TGGCAGAAATCAGAAAGCGGAA	GAGAAATGGTCAGTTTCGTGTA	five_prime_UTR
SNP1199388	scaffold7507	568337	T/C	TACCATGCACATGCACCGTTAT	TAGCACGCGTAAATATAACCAC	three_prime_UTR
SNP1199444	scaffold7507	575934	A/G	ATAGCTCTTCTTGCTCTTCGGT	CTTCGTACGCCTTTGTCTTGAC	intron
SNP1199779	scaffold7507	611360	T/C	TTTTGTGGCGAGTAAGAAACTC	AATCAAACTGCACCTCTGTCCC	intron
SNP1202575	scaffold7507	1109931	T/C	TCCGGCATAATGGGTTGTTTAT	CTGAAATCCTTTCCACCATCTG	exon
SNP1204892	scaffold7513	366968	T/C	AAAAGGTCATGCTGGCAAACTG	GAGTGACGTCAGCGGACAACAT	exon
SNP1205148	scaffold7513	403682	A/G	CCCACTTCTGTACTTTGACCAG	GGACACAGGACTAGTCATCTTT	exon
SNP1206116	scaffold7521	140177	T/G	AGGGTGAAGAGTTCGACATGAA	TTGAGCAAACAGGTCTAGCTGC	intron
SNP1206125	scaffold7521	145067	T/C	GGTGTCTACTGGACAGACTGAC	TTGGCTTTAATGTCCAGCCCTC	exon
SNP1206195	scaffold7521	172563	A/T	ACACTCAAGAGATGGGAAGTGC	ACACTGTACGCACTTGTGCGGA	intron
SNP1206453	scaffold7521	235407	G/A	TTACAGACTGCCCATATAAGGA	ACGACTTGACCATTGGTACGTC	exon
SNP1206747	scaffold7521	285179	A/G	TATCGGCTTGTGTGCTGACCCT	ACGACCACTATGTCCGGAGTAC	intron
SNP120698	scaffold717	255106	C/T	AACGGAATGGATTAAAACGGCA	AACACGTGTAAACACACACGTA	three_prime_UTR
SNP1207084	scaffold7521	332868	T/C	AGCACAATCGCTAGTGCAGCTT	TTTACGTAGGTATGGATTCCGG	exon
SNP1207162	scaffold7521	352669	A/G	GCTAAAAGTGCTCTGTTGGCAG	TGGTTCGTCAAATCACTGAAGG	exon
SNP1209177	scaffold7521	730430	C/A	GTTTGAGTCGGAGAAGGCCATC	AATGCTACAGGACTGCACACAC	exon
SNP1211830	scaffold7547	63125	G/A	CGAAGGCAGAACATTTTCTGAC	TGCAAGATACTGGACAAACTTC	exon
SNP1212246	scaffold7547	104988	C/G	CCTTCCTTCGTCAGTAGACAAG	ATCCATTCCGTTGTTGCCTTTC	exon
SNP1212442	scaffold7547	137618	C/T	TATCGCCTTCTTCGTGAGCGAA	GCACAGCTTGACGACATGAGCA	exon
SNP1212477	scaffold7547	146909	A/G	TGACCAATCACCAATGTGGTAC	AGCCAGCGATGCAAGTGTTCTT	three_prime_UTR
SNP1214162	scaffold7547	556998	C/T	TTTCTGCGCTCCTACTTCTGCG	CTGATGCTGACCTTGACCGGTG	intron
SNP1214196	scaffold7547	559245	T/A	TTGACCTGGAACGTGACCTTGA	GTGACCTTGAACGCCGTGATCT	exon
SNP1214202	scaffold7547	559596	T/C	TACCTCCTCCTACTACGACTAC	CGTGACCGGCGTCTTCTGTTTT	exon
SNP1214203	scaffold7547	559642	T/A	TTTTATCACGACTGTTGCTACG	GGCTCCTCTTTCGACTTTTACT	exon
SNP1214785	scaffold7547	614320	T/C	CTCTAACTCACGTGTTGTCAAC	GTACGCCGTTGTGGTAAGCAAT	exon
SNP1214814	scaffold7547	616172	G/A	ACAGACACTCTTGAGAAATGTG	GGTTTTCTGTTTCTTGCAGAGC	exon
SNP1215597	scaffold7547	839188	A/G	ACATGCTTGGTCACATGGGTCC	GAAGGTCCCATGTGGACAGCTA	intron
SNP1216121	scaffold7547	913556	A/T	ACCTAGGTACCGACCTTCTTGG	CTCTCCTTGTCGTCGTAGCCGA	exon
SNP1216619	scaffold7547	1052906	A/G	CCTCGTCATCAGCAAAGTCTGC	TGTTTCCCCATGTGCGATAGGC	exon
SNP1216978	scaffold7547	1189598	T/C	TGTCGTGGTATTCTGAAATCGA	TGTAGGAGGGTCGTGCGAACAC	exon
SNP1217385	scaffold7547	1332288	G/T	TCTGTGATAGAACACCAACACT	AGCTTAGTAAGAACCTCGAAGA	exon
SNP1217651	scaffold7547	1374943	A/G	GAATGGCTTGCAATAAGGCCCC	TTGACTGTACCAGAACCGAAAA	intron
SNP1218421	scaffold7547	1575790	T/C	GGAATGTACACAGTGTGCTGAA	TGCACTCTTTGGTTGAGAAGTC	exon
SNP1218486	scaffold7547	1579856	T/A	AACTGTAGGAGCCGTTCTCGCT	TGAAAGTGTTCCTGGAGGAAGT	exon
SNP1220149	scaffold7597	82600	A/G	GCTGACAACCAATGCAGTATGT	CTGTACATTGTCAGTGATGGGT	three_prime_UTR
SNP1220376	scaffold7597	129388	G/A	AGATCGAACTCCGCTTCCTGCT	GCAAGGTAGGGCATGGCATATA	exon
SNP1220975	scaffold7597	341446	T/C	AGGGTTTCAAGGCCTGCTGTAA	GTAGGTTCACCAGGCTTAAACG	three_prime_UTR
SNP122141	scaffold717	528832	A/G	CAAATGTAGTTTCTGCGAACGT	TAGTAATCGCCCATCTTGAAGT	exon
SNP122165	scaffold717	539544	C/T	CAACTGATTGTGGGAGAACAGG	CCATTCGTCGTAGGTAATCCAT	exon
SNP122252	scaffold717	585741	C/T	CACATCACGTGATCACCTGACC	GGCGTTCCCTTCATCGAAGTCA	intron
SNP1223106	scaffold7621	33126	C/T	CTCCTTACATCAGCCAGTAGAT	TCTGACTGGCTCAGTCCTAGTA	exon
SNP1224063	scaffold7635	233704	T/A	GGTGAATGGTGCTAATTTCACA	CTACGACAAGAACACATTCCTG	exon
SNP1224473	scaffold7635	304033	G/C	CCACGCATGCTTTCCTGGAGAA	CACTATCAGCAGCCGCCATGTT	exon
SNP122454	scaffold733	86944	G/T	GCGTATCGTCTGCGACAATTTT	TGTTGAAATCTCGTAGAGCTCT	exon
SNP1224885	scaffold7635	396479	A/G	GGGTAGAACGGCTGATATCACT	GGCAAACTGAAATAGTGCCACG	exon
SNP1225143	scaffold7635	454961	T/G	TGAAGCATCTGACGACATCCTA	ACGCCAGTCGATTCAGAATATG	exon
SNP1225238	scaffold7635	475252	G/A	AGCAATACGAGGAATCATCAGT	TGCTGGGTGACTGTTGGTTTGG	intron
SNP1225463	scaffold7635	528823	G/C	CTCTTACTACCAGACCGGGTAA	GTCTGTGAGCGCGTTGTTGTAA	exon
SNP1226781	scaffold7635	818931	C/T	TGATCTGAGTTGTCTTCCCTGA	TCTCCCCAATCACAATCAACAC	exon
SNP1229393	scaffold7647	54531	T/G	CAATGCATTAGATGTCAGCTGA	TGGCGTCAGCGATGTCAACATC	three_prime_UTR
SNP1230152	scaffold7653	19585	G/C	AGTTGGTCCAGTACTCCACCAT	TGCTGAGTTGACGTTCCTCAGA	exon
SNP1230849	scaffold7653	126794	T/A	CGTTATATGGCCAATGACGGTA	AACAGACCTGGACTCGTTGCTA	exon
SNP1231775	scaffold7653	398294	A/C	ATGTACCCAGTACCGCAAGATT	TGGATGACAGGTTTACCCTTTG	exon
SNP1234010	scaffold7653	680759	A/G	CTATGATGGCTCATACGCGGCC	TCCCAAGGACCCAGTACAACAT	exon
SNP1234399	scaffold7653	737018	G/A	GACATCCATGCGTGTCCTTGGC	CGTTCGGACACAAAATAGGGGA	exon
SNP1234459	scaffold7653	741318	C/T	GGTTTTGGAGAAGAATCGTCGG	CGGACTTCGGAATCCCGGCTAT	intron
SNP1234894	scaffold7669	14125	G/A	GTTTCTGTCCGACAATCAGAAA	TGGCTGTTCTGTGATGCATTTC	three_prime_UTR
SNP1235539	scaffold7669	187714	C/T	CTACTTCACAGTGTACCGTTCC	CAATGATAGTCGTCTGCCTAGG	intron
SNP1235586	scaffold7669	216247	C/T	AGCCAAGTCTGGTTATGCTGAC	GCATCAACAGGGCAAATACTTG	five_prime_UTR
SNP1235833	scaffold7669	315355	A/T	CACACAGGCCTAGATAGGGATA	ATGTCAGGAGGGAGAATTATGT	three_prime_UTR
SNP1236495	scaffold7669	641847	G/A	AGATTCTGGAGCCAGAGCAGCA	TGGTATTGTTCCAAGTGCTTTG	five_prime_UTR
SNP1237970	scaffold7669	1061388	T/C	TGTACACGGCTGAGAGCTCCAC	CTGACCAGTATGCAGGTATGTC	exon
SNP123827	scaffold757	254317	G/A	GCACGACCCCATACGTCTTAGT	GCCACTTGTTAAGATGGGTGAT	intron
SNP1239324	scaffold7695	140048	A/G	TTTTCCTTGGGCGACATTTCCG	ACGTCATCAGAACGAAATTCAC	exon
SNP1239663	scaffold7695	383624	A/G	GAAAAGTTGACGGACGACAGGC	ATCATGGCATAAGCTCACTATC	intron
SNP1239799	scaffold7695	535853	G/A	CAGAGGACTTGTCAGATGATGA	CTGATGACTGGCTAGAAAAGGC	five_prime_UTR
SNP1240724	scaffold7713	62891	A/C	ATTCCGGTTCTGTTTCCAGTTC	CTCCCATCAACACCAGAACATA	exon
SNP1240862	scaffold7713	93799	A/C	TCCGATTCGCCTAGTCACATGC	AGGAGGTCATTTCACCGGAAAC	intron
SNP1241518	scaffold7713	282016	G/T	AACAGCGTCAACACAACAAACA	CAAAATCTACCAGCAGGCTTAT	intron
SNP1242569	scaffold7713	605650	A/T	GTCGCATCATGTATGAACAGCC	AGGTTTTAACTAGCGGGACAAG	five_prime_UTR
SNP1243695	scaffold7713	827540	A/T	TTCACTTCACTTCTTACCCAAG	TCTGGGTTAAGTACACAGGTAT	exon
SNP1243933	scaffold7713	890285	T/C	AAAGTGTGCGCGGAAGACAAAA	TCCCAAGGTTTCCAAAGAAACC	exon
SNP1244789	scaffold7721	71380	A/T	CCACAGGGATACTACATGCTTG	ACACGACCGTTCAACCTACAAT	exon
SNP1246116	scaffold7725	224510	A/G	CAACTTGTCCCCACTCCTCAAC	CCAGGAGATTGCACAACTTGCG	exon
SNP1246282	scaffold7725	245964	A/T	AAACTGCACCCTCTCCAGTAGT	TGTTCTCAGAATCGCTGGCGAC	three_prime_UTR
SNP124674	scaffold757	393037	G/A	CCGAGTGGTTTGTTTTGTTTGA	ATTGTGTACCAAGGTTATCCTG	intron
SNP1247001	scaffold7725	369060	G/T	CCAAATCGGCTTTCACTGACTC	AGGAAACAGCCAATCGGTTTGG	exon
SNP1247414	scaffold7725	437625	C/T	GTGCTGAATCCACACCACTTGG	AAACAATGGTCCGTTGTGCCTG	exon
SNP1248580	scaffold7725	688509	G/A	GTATAGCCAGCTCCAGGATTAC	GCATTGTTGTCCGTTACCAGAT	intron
SNP1251205	scaffold7725	1293269	G/A	TCAATACTGACGGGTCATTCCG	AGTGTGGTCAAGGCTTCGTCTT	exon
SNP125164	scaffold757	506860	C/A	GCTAGATATCTGATGATGTGCA	AGCCAGACGAAGTTTACCAAGA	exon
SNP1251744	scaffold7725	1393967	G/C	CATGCATTTTGGGATTCAGTCG	CATGTGTATATGCATTGATGGC	exon
SNP1252110	scaffold7725	1449733	G/A	AGTCTACCTTGGTGATACACTT	ATGTTGTACTGTTCATCATCGG	intron
SNP1252378	scaffold7725	1482561	A/G	TGATGAACTCGTCCATAAAGCC	AAGCGTTGATGCCCATTGTGAC	exon
SNP1255898	scaffold7763	51331	C/T	AGGTGATTCCGTCAGAACTGTG	CTGTATACGTTTTGGCGAAGAA	exon
SNP1255960	scaffold7763	59895	A/G	ACGTTTAGCGTGTGAACTGTAG	GTTGAGTAGCTCGCGGAGAAGA	intron
SNP1256223	scaffold7763	88974	C/G	TTCTAGTTACATCCGGAACCAC	CCACAAGACCGGTAGTTCCGTT	exon
SNP1256644	scaffold7763	159347	T/C	TGTACGCTTCAAACCCACACAC	CCATCTCATCAAGGGGAAACAC	exon
SNP1256964	scaffold7763	274282	A/G	GCCTCGTTGATATACCTGTCGC	GACTGGTCCAAAGTCCTGTCAA	exon
SNP1257114	scaffold7763	330037	A/G	TGATAGCATGCGTCTAAACATC	GGAAGACAACACGCATAGACGC	exon
SNP1258364	scaffold7763	679588	T/C	TTGACTTGGCTGTTCAATCGTC	AAGCTTACGCATCATGGAGCAA	exon
SNP1258492	scaffold7763	729825	C/T	ATCTGTCGTACAGTGAGGGAAA	CTGAGGATGAGGAGATTGCCTC	intron
SNP1258902	scaffold7763	830528	C/T	TGAGGAGGAGCTATGGTCTGGC	CCTTCAGCATGGATTGAGTTAC	intron
SNP1259528	scaffold7763	961358	C/T	CAGTCCCTCACTATCTGATAGC	CACAGTCTTCGTGATACCAGGC	exon
SNP1259677	scaffold7763	992794	G/A	CCTGCTTGGCTAGACTGTCAAG	TGTCCGACAACATGTTGTCAAT	intron
SNP1259909	scaffold7763	1017919	A/C	TTCTTGCCCTGTACTAAGTGAC	TGGTTGTGGGTCTGTACTAAGT	intron
SNP1260032	scaffold7763	1029861	T/C	AAGCTCAGGATGCTCTCGAGGT	ATAGGTCGGATATGTTGGGAAC	intron
SNP1260653	scaffold7763	1327423	T/C	ACCCTTTGGCTAAGAACACACC	TGTGTATCAACTACCATGACCA	exon
SNP126132	scaffold775	165981	T/A	TGTAATGTCAATTCCACACTCC	GACATATGGACCAGTGCCTGGG	exon
SNP1264264	scaffold7833	148922	C/T	TGGTTTACTTGTCCGTCTACAA	GCAACATATATGATCTCCCCGA	exon
SNP1264437	scaffold7833	176488	A/T	CCCTGCTATCGTGGACGAAACC	CCAATCAATTTCAAGTCCACGT	exon
SNP1264562	scaffold7833	199720	T/C	AGGTTGGCATACCCAACCAGTA	CAGGTACCCCTTTTGACCTACA	intron
SNP1264735	scaffold7833	218604	A/T	TCACTAATGCGACAACCATCAA	GTGATGGTAGTACGCATATTCC	exon
SNP126527	scaffold775	214688	T/C	ATGTCTTCTTCTTTAGCATCCC	CAAGATTCTTCCTGAGTGGGTA	exon
SNP1265996	scaffold7833	493713	T/G	AATGCTTTGACATGTGGATTGG	TTTTGTGTCGCGGTACATCTTT	three_prime_UTR
SNP1266289	scaffold7833	563441	A/G	CATTTGATGTTAGCCCAACGAT	ACCTCCACGAATGAACATGGAT	intron
SNP1266634	scaffold7833	601169	G/A	TGTTCTTACACAACTATGCCGA	GAGGGGACTGTCAGGAATCTAA	exon
SNP1267042	scaffold7833	712849	A/C	ATTCCACAAACCGATAGCCCAG	AAACAAAACAGAGGTTCGACCG	exon
SNP1267346	scaffold7833	768362	C/A	GTGTGACAACGAATGACAACGC	TTGAAAGCACATGCACAGAGCC	intron
SNP1267929	scaffold7837	56872	T/C	ACGATAGCACACACATTTCCTC	AATGAAGTTTACCCGTGCGATA	exon
SNP1269154	scaffold7841	85380	C/T	GTTCCAACAGTCGCCAGTACCA	CGTTTATGTTGAACCCAGACAT	exon
SNP1269465	scaffold7841	166273	C/T	TGTTCTGTGTGACGTCCTGTAG	GTGTCTGCGTGTGACAGTTGAG	intron
SNP1271117	scaffold7901	112846	A/T	TGTGATCGGTATGTATGTCGTT	GATTGGGTGTATACAAGTGCTG	three_prime_UTR
SNP1271364	scaffold7901	164294	G/C	GGACCTGTTCAGTACAGTAGCC	TTCCTCACACCAGACTTAGACA	intron
SNP1271697	scaffold7901	239256	C/A	CCACGGTGTTATTTCCGATCAC	TCTTTACGTCACGAGCGTGTGA	exon
SNP1272304	scaffold7901	326084	T/C	ACAGATGTCTTTGCAACAACCA	AAAGCTGTTACAATGAGGGGAA	three_prime_UTR
SNP1272451	scaffold7901	367042	T/G	CTCCAGAGTACGTATGGCACCA	CGCTTCTGTCGCTGTCTTTTGT	exon
SNP1272988	scaffold7901	625774	G/A	ACTGGCCACAGAAGGGAAACAA	TCACTCTTCACTGTTCCTGCTG	three_prime_UTR
SNP127379	scaffold775	399823	T/A	TACCTCATTCATCCCAAGCATT	AAATCACTGAACAAGGCCAGGG	intron
SNP1274483	scaffold7907	16750	T/A	TTATATGGTTTACCCGAAGCTG	CGGCAGTCTGCAATTCACTTCC	exon
SNP1276597	scaffold7907	335598	G/C	TGACCCCGGTCTTCCTACTGGA	GATAACCATTGTCTGTTTGCAG	exon
SNP1277037	scaffold7907	382075	C/T	AGACTCGGAATAGACAATGGTT	GTCAAGGTAGATAGAGGTCAGA	five_prime_UTR
SNP1277566	scaffold7907	426696	A/C	AGGTATGTGTCATCAGGCCGTC	CGTCAATGAAGAAACAGCCCTT	exon
SNP1281740	scaffold7939	81347	T/A	TTCAGCTGTGAGCGTTCCCTAG	AGTAGGTACTCCACCTGTTGTT	exon
SNP1281999	scaffold7939	203867	T/C	AACAAATGACACGCTCTTGGCT	GTACTGTGTCACCTCACTAACT	intron
SNP128249	scaffold775	577071	A/G	TCTGCTACCGTTGTCTGCAATT	AGAGATGCCTCCTGTCGTTCTA	intron
SNP1287257	scaffold7987	1162930	A/G	TGGGTATGGTCTGGTGGATGAC	GGTTAAGGCCACACAAGAATGT	exon
SNP128751	scaffold785	138584	T/C	TTCCTGTAAGTGCTGTTCCCTG	AGTACAGGAGGGAGCTAGATAA	exon
SNP128814	scaffold785	203249	T/C	GCATCAAGGGAGCTAATTTGTA	GGAACATTCCAAGGGACTTCTC	intron
SNP1289935	scaffold8035	155898	T/C	GTTTCTCGGTGAATTTCTTCAG	AGATGGCCACTGACTCTGCTGA	exon
SNP1290921	scaffold8035	248130	G/A	GATCACAAAGGTAGCCGTATAT	CAGCCTCATCTTCATCTTCCCA	exon
SNP12918335	scaffold10441	471458	C/A	TGACACAAACATTTCAACTGCC	TTTCCGAGTTACCACGGAATAA	five_prime_UTR
SNP129233	scaffold807	53832	C/T	CTAATACCTGTCAGTACCGCTG	ACGTCTACGGGTCATTCCATTG	exon
SNP1293436	scaffold8035	520512	T/C	TGGGCGGTCATATTGTCAACTG	ACAGCTGGAAATACATCACACA	intron
SNP1293990	scaffold8035	640604	C/T	CAGAGGCACCAACTACCACATC	CCACAACAACAGAGGCACCATC	five_prime_UTR
SNP1296133	scaffold8037	43018	G/A	TGGACGATTTAGAGTCACACCT	GCAGTCTGTCGGACAGTATGTC	exon
SNP1296849	scaffold8037	203295	A/G	ACTTCCACGGTGTCATCACCTC	AACAATACCCGCGTGACTGGAA	exon
SNP1297566	scaffold8039	13353	T/A	TCCCATCTGGTTACCAGCCCAA	AAGCCTGGCTCATCCTGGTAGC	exon
SNP1297645	scaffold8039	70785	C/T	AGCTCCTGGGACACTCAACACA	ACATTTGTGTAGGCGACTGCCA	intron
SNP1298321	scaffold8039	260056	A/G	TCTCCGTGTTGTTGGAAGTGTA	ACTTGTTGTCAGTGACCAGTAC	exon
SNP1299549	scaffold8057	45773	C/T	TCGGTAGGGTGATTTCCGACTT	TCGATAGGAAGTTGGCTTTGTA	exon
SNP1302014	scaffold8057	863979	C/T	TCTCAGGACTGTCTGGACTGTC	TAATTGCATGACGACCCTTTGA	three_prime_UTR
SNP1303571	scaffold8065	80102	G/A	ACCCTAGCGGAAAGCCGATAAA	AGCACGTAACTCCAAGACGAGT	exon
SNP1303980	scaffold8065	109363	C/T	ATAAGGACCCAGCGCCCAGTTT	CAATATTTGGCGGCTGACATCT	exon
SNP1304338	scaffold8065	178522	G/A	AAGAAAACTCAACCCTCGGATA	TTAAAGTTTCGCAGCTGGCAAA	three_prime_UTR
SNP1304815	scaffold8065	241065	T/G	CAAGAGCATCCTTTTCACCATC	CCATCGGGGTAACACAAAGAAG	intron
SNP1305050	scaffold8065	276075	T/G	TGTAGACTTCAGGAACATCCGG	TTTCGTCAGCTGCCGTAGAGGG	exon
SNP130508	scaffold827	70016	A/T	TCACTCACTTGCATTGTTGGTA	AATTCTGGAGCTCTGGTTTGAC	exon
SNP1306233	scaffold8071	1478237	A/G	TTGAAAATGCATATCAGCTGCC	ATCTCCAAACTCGCAAACAATC	three_prime_UTR
SNP1306956	scaffold8095	4947	A/G	CATCATGCAGTAACAGACCAGA	CTTTGGCGTTAATTGAGCATGG	exon
SNP1307035	scaffold8095	47257	A/G	CCTCGGTGTAGGCAGTAAGGTC	GGCCGATGTTGGAGATGACCTC	intron
SNP1307155	scaffold8095	103039	A/G	TGCTGAGGTCACCCTGGAAACC	GCATTTGCTCCATTCTCTGTCA	exon
SNP1307341	scaffold8103	11597	A/T	ACAAGAGGCAGCGTCGTATCTA	CCCCGGTGAATATGAAAACCTT	exon
SNP1309444	scaffold8123	45462	C/T	GTCCCTTGATAGCCTGGATGAG	GGGCGGTCATTGTCCCTGGTAA	exon
SNP1309776	scaffold8123	189562	T/C	TGTAGCGTTGTCGAGTTTTACT	TGTAAAGCACTCAGCCAACTAC	exon
SNP1310153	scaffold8123	395229	A/T	ACCTTGTTATTGAGAGCCACCA	ATGCTCGCCTTAAGTGCATTGT	exon
SNP1310219	scaffold8123	440528	T/G	GAGGGGTTTATATGGAGGAAGG	GGGAGGGATTTATAATGGGAGT	three_prime_UTR
SNP1310252	scaffold8123	452314	G/A	TGCGGACAATTCATGATGATCA	TCCACCATATCCTGGTACTTCA	exon
SNP1310702	scaffold8123	592630	C/A	TGATACGTAAGAAGTTTTCGGC	ATTTCTGGGAGGACGTGAGAAA	exon
SNP1310762	scaffold8123	622409	T/C	CACAAGGGCTAGAGCCCGAGTA	CGATCACACCTGACACCAGATA	exon
SNP1310776	scaffold8123	631565	T/C	TTCAGATTTATAGTCCCGGTCA	TCAGTGTCACTCCACTTTCCTT	intron
SNP1311231	scaffold8123	757629	A/G	CAGAGCCATATTGTTTGGACTC	TGGAAAAGATGTCATGTGACGC	exon
SNP13113360	scaffold10797	4333611	G/C	AGGGCATAGGCTCAACCCTACT	GAGTGGCACAGGTAACATGTTT	exon
SNP1311360	scaffold8123	812495	T/G	CCTACCCACAGCAACAGATGAC	ATCCTGCCCAAGATCAGGGTCA	intron
SNP131140	scaffold827	330172	A/T	GACCATGAGAAGAGCAAACAGT	CACACACACATCATCATCCTAA	three_prime_UTR
SNP1315488	scaffold8123	2029115	T/G	GAGGAAAAGTGGAAGCAATCGT	TACAACTTACGGAAGCACTGGA	exon
SNP1316115	scaffold8123	2131204	T/C	AGTTCCAGCAGGCGGTAAACGA	GGTTGATCATCGAGTGAGTTAC	exon
SNP1316870	scaffold8123	2226850	A/G	GTTATGTGGTCTACGTCAGAGC	CTTCTGCGTCGGAAATGACTGT	exon
SNP1317000	scaffold8123	2241175	A/C	AAGTTCGATTTGCCTTCACATC	AGGCTGTCATGGACAAATATGG	exon
SNP1317002	scaffold8123	2241561	A/C	CCAAGTTTGAAAAGTCAGTGAC	ATAACCTGAGGAACTTCCTGGA	exon
SNP1317600	scaffold8123	2394456	T/C	TCCTTTATGACAGTGTGAAGGC	GTGACTTATACATCCCCGATCT	exon
SNP1317988	scaffold8123	2511936	C/T	CAACTCCAATCCCTGCAGAGTA	TTAAAGCTCAAGATGCCACGCC	five_prime_UTR
SNP1318079	scaffold8123	2542545	G/T	TTGGAGCCTTCATGTTCTTTGT	TCTGCTTGATGCTGTCTACCTT	exon
SNP1320066	scaffold8123	3125692	A/C	AATACACGGTCGCATTGTCATC	TTCCGATGAAGTAATCTGCAGT	three_prime_UTR
SNP1320723	scaffold8123	3302645	C/T	TGATACCTGGCATGCAACTTGT	AGAGATGGTGACCTCTCACATT	intron
SNP1321849	scaffold8123	3587407	A/G	TTGACACAGACTTGAGCCTGTC	CCTTCCTTTGTGCTGGGTACTG	exon
SNP1324676	scaffold8131	497399	A/G	AGAACGAGAATCCCTGCTGTGG	CTGTGGCAGCATTGAACTGGTA	intron
SNP1325356	scaffold8131	702807	A/G	TGTAGGTATCCAAGACACAGCA	AGATCGAGGACGGAATGTTTTG	exon
SNP1325407	scaffold8131	743436	C/T	GTCATATCCGGCCATTTTCTCT	CTTGGCGTTGAAGTATTCGTTC	exon
SNP1326451	scaffold8131	958596	A/G	GGTGTTGGGATTGCCTGCAAAG	TGCCCCTGTCCGTGTATTTGTA	exon
SNP1330319	scaffold8149	430673	C/A	AAAGGACGGATTCGGGATTCAT	ACAATCACGATGGGCGTTCTGC	five_prime_UTR
SNP1331550	scaffold8149	788525	A/G	TCTGGGTCCAACCTATTCAACC	GATCGCGATAAATAGAAGCGGC	intron
SNP1331799	scaffold8149	836127	T/C	TCAGAGTAGACGTGACAACAGA	GAAAGACCTGGCATTCTGCAGA	exon
SNP1332641	scaffold8149	1153477	A/G	CATAGCTGACATGCAGCTTCCC	AGTACGCTCCGGTAACTCTCGT	intron
SNP1334122	scaffold8165	159470	T/C	CTTTAGAAACCTCCCCTCTCAT	CAGTATTTCACACAGTACACCA	intron
SNP1335620	scaffold8167	190549	A/C	TCTTAGGAGATTGGTCAGGAGC	TTTCAGGAGCAGGGGTTTCAGG	exon
SNP1335657	scaffold8167	194525	T/C	TTGTCGCTGACATTTCCCTCAG	AAACGAATGATGACACCACCAC	exon
SNP1335700	scaffold8167	197375	T/C	TGTTGCTGTGCTCAGTATCAGA	TTTTAATGGATACTCCAGTGGC	exon
SNP1335708	scaffold8167	197897	C/T	CCTTTACAGCAGCCTCCAACTC	CAGCAGATTCCACCTCCTCTGG	exon
SNP1335728	scaffold8167	199508	G/A	CCTCGACAGACACTCCAGTTGC	GAATTTCGTGGACGCCATTTCC	exon
SNP1335963	scaffold8167	217005	G/A	GTTATAGATGAAGCCAACAGGT	CCGTTGAATTGTTTTCGCCATA	exon
SNP1337143	scaffold8183	81732	T/C	CCCAGTATCCGATACACTGAAG	AGATTGCGGAGATCACCAGAGT	intron
SNP1337216	scaffold8183	97513	G/A	GGTCGACCAGCAGCTATTGTTA	CAAGTAGGCAAGGGTGTAGCTG	five_prime_UTR
SNP1337568	scaffold8183	140675	T/C	CTTTCGTGCGTCTGTCCACTAA	CAGTTCCATCCTGCTGTGATAC	exon
SNP1339718	scaffold8183	517242	C/A	ACACGTTATCCGGAAACAAACA	CCGCACCAAGTACAGTATCAAC	exon
SNP1341946	scaffold8183	854974	T/G	ATGATGTGACGACCGAAGCACA	CAACTGAAGGTCACGTTGGAAC	intron
SNP1342282	scaffold8183	901502	T/C	GGTTGTCACGATCGCGGACATT	CCGGCGTGTGTTGGAGAAGAAG	exon
SNP1342495	scaffold8183	928326	A/T	ACCTTGCTTTAATGTCCATCTC	TTGCATCTACGCATGCAGCCTA	three_prime_UTR
SNP1342573	scaffold8183	946345	G/T	GGATTCGAACCCTCAAAACTCA	CCATGCTGTTGGTCTAACCGAT	intron
SNP1343606	scaffold8195	94657	C/T	TTAGCCTTTCGTCCAGAGCCCC	CACGTTCTCGATCTCTTCTCCT	exon
SNP1344207	scaffold8195	182733	A/G	TTGCATCTTGCTGTGAGCTGGC	CCCCAGGGTCTGATCTGCGTTT	exon
SNP1345445	scaffold8195	445431	C/G	GGAACAGATTGCCCTCGTTAGT	GGAGTACAGTGACACTCCCGTT	intron
SNP1347921	scaffold8195	765210	A/G	ACTTGGTGTCAGAGTGTGAGGC	GCAACTATGCAAAGTGTCCTCG	exon
SNP13485	scaffold83	200006	A/T	CCGATGATTGGCGTACAAAACT	CTTCCTTTGCTGCCTACAACAT	exon
SNP1350189	scaffold8195	1174266	T/C	ACATGCCCGGAGGAAATGTACC	CTCCCTGTGGTCTTGTCTTCAG	exon
SNP1350966	scaffold8195	1318841	G/A	GATACTCGCGCTTCAGACGTTC	CCACGTTCGATGAGGCCAGATC	exon
SNP1351747	scaffold8195	1415023	C/A	AGTCTAGTTCCTCCTCAGTGAC	CTGCATCCACAAAATCTCGAGA	intron
SNP1352633	scaffold8195	1508287	A/C	AACAAACCATCGGCGTCCCAGT	CCCTACGAGGCCCTACATTTGT	intron
SNP1356007	scaffold8195	1928910	G/A	CTCCCGAGTTTTGACAGGAAAC	TCTACCATCCCCATGACGTATC	exon
SNP1356450	scaffold8195	1999861	T/A	TCGCCTGTCATCCATCGTCATG	CGATGTGGTCGTGCATTAATAA	intron
SNP1358128	scaffold8195	2217338	G/A	GCCAAACATCCCTTGCATGCCT	TATACCTCCTCCTCCAATTCCG	intron
SNP1358161	scaffold8195	2222318	C/A	GTCAGCTCAACTACTCCCTTAA	ACCAACCAGATAGACCTTCCTT	three_prime_UTR
SNP1359525	scaffold8213	91144	A/G	ACGACGCCTACACAGTTTCATC	GCGACTGTTCCCCACAAAACCC	exon
SNP1361532	scaffold8213	538466	C/T	CGAAGCGACACAAGACAGATCA	ATTCTAAAGATGGTGAGGACAC	exon
SNP1364121	scaffold8213	1034644	A/G	AGGTCATCAACAGAACAGAGTG	TTTCGTCAAAGTGACAGGTACC	exon
SNP1364710	scaffold8213	1149962	T/A	ATCGGGTCGAAATTGTAATCGG	CTCAACCGATGCGCTTCATGAC	intron
SNP1365059	scaffold8213	1172497	G/A	TTTCCAGGAAGGAGTCAGACAC	CAACCACAGCTTTTCTCAACTG	exon
SNP1366290	scaffold8213	1377715	G/A	GTAAACCCTGGAATCAGTATCC	CCACACCCAATAGACCAGTTTA	intron
SNP1366560	scaffold8213	1418823	C/A	CTACTGAAAGATCACGACATCA	AAGGCAATTCGTGCGGGCAAAA	intron
SNP1366635	scaffold8213	1440304	A/C	ATTTGAAAGGGGCCAGTGTCGG	CATTCGCCTGTATCCTAGGTTA	exon
SNP1366792	scaffold8213	1513320	T/G	TTTGGTGTTGTTGATCACACAC	AACTGTTGCCATGGTTGTGATC	three_prime_UTR
SNP1368181	scaffold8213	1846801	G/C	TGGACAAGGACACTTCTGTTGA	TGGCAGCTCCGTCAGTTAGAGC	intron
SNP1368468	scaffold8213	1913036	A/T	CTACCAGTTCATCAACAACCGT	GGTCACTCTCATGCTGGACAGA	five_prime_UTR
SNP1369468	scaffold8213	2057280	A/G	AAAATCAACAACCAGGGGAAAG	ACATCAGTCTGCTCGATCAACA	exon
SNP1370649	scaffold8213	2293449	A/G	TAGGGAGGGGCACAATATGGGG	ACTCTGACTCGTAAGACTGGGC	intron
SNP1370700	scaffold8213	2304454	C/T	CAACACAGAAGAGGGCATGTCG	TTAGACGGCCTGATGACTGATT	three_prime_UTR
SNP1370923	scaffold8213	2348002	G/A	GACAGACACAATGATCACCTGC	GAGGACAGACACAGAGATGGCC	exon
SNP1370936	scaffold8213	2351208	T/C	AAATACATAAGCCTGGCCCTAG	CAAATATACCTATGCCAGGCTC	exon
SNP1371106	scaffold8213	2438394	A/T	ACACAAGCTGTCTGTGCATGTG	GACAGCTGAGGGAACTGGCACT	exon
SNP1371363	scaffold8213	2523082	C/T	CCACCATACAGCCCATCAGGTA	AGCGGTACTGGCTCTCGTAAAG	exon
SNP1371795	scaffold8221	17485	C/A	ACTCACGTGGAAACACCATACA	GTGTGGGGTTGTGGACAAATGT	exon
SNP1371900	scaffold8221	67866	T/C	CTTGGCTTCCTTCCAGGAAAAC	GCTGCTCTTGATTGGACTTTTA	exon
SNP1372894	scaffold8221	385681	C/A	AACTCCCTTTTGACTCACAACA	TCCCTAAAGGCCTAGTGATATC	three_prime_UTR
SNP1374422	scaffold8221	526656	G/A	CATCATCGTCATCCGACTCCGA	CGCCGGGGACAACTGTTTGTAC	exon
SNP1374580	scaffold8221	553211	C/T	GGTTTGGAAACTCATGGCTGAG	CAAGCGCTTGTGTGTACTCTAC	exon
SNP1375622	scaffold8233	63608	G/A	AGATATCCAGCGGGTCTAGACC	TTGAACGCTGAACTCCAGACCA	intron
SNP1375861	scaffold8233	142487	T/C	ATCAGCTGGGAGGATTATACAA	ACCGGGCAGTACATGGACAGAT	exon
SNP1375986	scaffold8233	164334	G/T	TGAATTTGGAGCACATATCAGC	CAGTGATGAGGTTAGCCTTGAG	exon
SNP1376059	scaffold8233	180833	C/T	TCTACGATGTCACAAAGATGAG	TTGATAGCATGCCTAGTTGGAT	exon
SNP137779	scaffold893	54599	A/C	AGGAAGTCGGTAGACATACCAC	AATATTTCGGGGAGCTTGCTCT	intron
SNP1378764	scaffold8233	785659	G/A	CACTCTTTTCATCCCACCCTAT	CCAACTGGGATTTGTCCAGAAC	intron
SNP1378967	scaffold8233	817163	G/A	TGTGAGTGAGGATATGGTTCAT	AAGGACTATGTATCGTTTGGGC	three_prime_UTR
SNP1380915	scaffold8297	32400	C/A	TCTACAAAGGATGGGTCATGGT	GGCTCACTATCAAGGTCACAGT	exon
SNP1381038	scaffold8299	9286	A/G	CGGTTCTCAATGGAAAATGGAA	CAAGCGTCGACAATTTTGCTCC	exon
SNP1381062	scaffold8299	10376	A/T	ACAGGAAATCACAATTGACGGC	TGTCACCATCAAAACCACAACG	exon
SNP1382521	scaffold8299	102168	C/T	GTATTAGTATCGATGACACGGC	CTTAACGCCACTATTTGCAACA	intron
SNP1382872	scaffold8299	132604	A/G	GACAGGCGAACTTCATTTGCCG	TTACTGTGGTGCCAGCTTACGA	exon
SNP1383246	scaffold8299	161552	A/G	CGAGTTTTACTTCGCGTCATCT	TGGTGATGACGTAGGCTTCATC	exon
SNP1383606	scaffold8299	192653	T/C	ATTGTAAAGCATCTCCATCTGG	GATGACCTTCACCTTGCAGAGA	exon
SNP1383675	scaffold8299	196751	G/T	CGCTGCAGGCCAGTATTTCCTG	AGACGACACACCCAATGGACCA	intron
SNP1383906	scaffold8299	215027	T/G	TGGAGGTCACACTTACCCCAAC	GTTGTTGGTCCAGCAGAGTGAC	exon
SNP13848830	hete_36019894	456	A/T	GACAGAATTTGTTGCCTGATTG	ACTTTCGCCTGCTGCGTAGTTT	intron
SNP13851835	scaffold10007	44710	C/T	TGTGGCGTTTCCAATAGAGTCG	ATTTGTGTCCTCGGTAATGGAG	intron
SNP13851906	scaffold10007	74743	C/T	AAGTGGAAAACTGCTGTAGGAA	AGAGTATGTCTTGTTCACCACA	intron
SNP13851919	scaffold10007	80214	A/G	GACTTAAACTTCCACATACCCC	AGGAAAGATACACCATTCCCTT	exon
SNP13851995	scaffold10007	185995	A/G	TCTTACCTAAGACACGTTCTCC	CTCCCAACTCCATGTAAGCAGC	exon
SNP13851996	scaffold10007	186043	G/A	CATTGAAGGCAGTCCTGAAGTT	CCAATGCGATATCCTTGCCATT	exon
SNP13851997	scaffold10007	186088	T/G	CATTGAACAAGACAGTTGAGCA	CCAGAATCCTTTCAGGAGCTCC	exon
SNP13851998	scaffold10007	186447	T/C	GAGTTGAAGGGGATTTCACAGA	TTGTTCCTGTGACGGAAGCCAG	exon
SNP13852014	scaffold10007	189192	T/C	TGTTTTGGGTGAGTGTTCCAGT	CAGAGCAGATGGTGGAAGTAGA	exon
SNP13852022	scaffold10007	192459	A/G	AACCGCCGAACAACTGTTTACA	TGACCCATTCAGGTGTAGTAGG	exon
SNP13852025	scaffold10007	192864	G/A	GTGTGATAGCTACTCGGTAGCT	CCCGAGGCTGTAAAACAGAAAT	exon
SNP13852212	scaffold10017	752	T/A	ACGACAGAACACACACATGAGC	TATGACGTCGATGAATGGCCGC	exon
SNP13852254	scaffold10021	18829	C/T	AACAGTGGACATCCGGGGTACA	CGCAGCTGCAAGAGTATTGGTT	intron
SNP13852306	scaffold10021	79130	C/T	CACAAGTGGTGTGATTCTGACT	TTCTTGCATCATGTCCCGATTC	exon
SNP13852332	scaffold10021	101068	C/T	ACGTCGACAGAAACAATAAGGC	CCAATGAGCTTCTCACTATGAT	exon
SNP13852354	scaffold10033	81218	C/T	AAAATGCACGAGGAACAAACAG	CCTCATGCTGGCAAAATACAAG	five_prime_UTR
SNP13852830	scaffold10041	205009	T/G	TTGGAATGCGACAAAGTTTCAC	CTATCACTTCTTCTGAGAGGCT	exon
SNP13853028	scaffold10045	339937	G/T	AGCAACAACAGACAAGGAAAAC	TGGTATGTAGGCACAGGGTTAC	exon
SNP13853201	scaffold10045	414361	C/T	TCACTTTCGTCAATGTCTGGAG	CTTGTGTTGAAAGCGTCATCCG	intron
SNP13853594	scaffold10045	775526	C/T	GGGAAATGTATCCTGTCAACCT	ATGTAAGCATAGTTCCAAGTGC	three_prime_UTR
SNP13853616	scaffold10045	814392	G/A	AGAACGGTAGCTACATGTATGC	ACAATGACCAGACACCTTCTTC	exon
SNP13853908	scaffold10045	1200962	C/A	AAACTCATGTATCCCAAAGCTC	CTGTTCCCAGACGACTTCAAAT	intron
SNP1385398	scaffold8299	333173	A/T	TGTCCAATACTGCACACATGGA	AGTACTGCAATCACATGATCGT	exon
SNP13854097	scaffold10059	137133	G/A	TGGTATAGGGTTGATCGCCGGC	GGTAGCTAAATTGGTTAGAGCA	intron
SNP13854190	scaffold10059	204019	A/G	CGAGGAAGGTGATGATGAGGAC	GGACGATGAGGACGACGACGAT	intron
SNP13854276	scaffold10059	455525	T/C	GAGGAGAGTTTGTGACGTCCAT	ACAGCATCAGAGGACAGCTAAG	exon
SNP13854374	scaffold10059	547611	C/A	TCTCCTCTCTGGCCTACAAACC	GGACGATGCTCAAAGTGAGGCT	exon
SNP13854551	scaffold10065	74996	A/G	GCATCAAAAGCGTCGTGCTTCG	AAGCTGGACAAGAACTGATAAC	five_prime_UTR
SNP13854612	scaffold10065	116487	T/C	CCATCTTGATGACGGTTTTCTC	TGATGTGTTCCTTGTTGTTGGG	exon
SNP13854615	scaffold10065	119310	T/C	TGGTAGTTGACATGGCATCATC	CTTCTGGTTCCTCTAGTGATGA	exon
SNP13854683	scaffold10065	180262	G/A	GTGCCTGTCCTGAGAGAAGCTC	ATACACAGCCGATTGCCCACAC	exon
SNP13854816	scaffold10065	349212	G/T	TTCTCCATGCCGAGCCTTTGGT	GAATGGCTTGGTATGCCAATGT	intron
SNP13854996	scaffold10069	16118	T/C	ACTCCGGGGAATGGTGTGAAGG	GGAACGGAAAGGTCAGTGTCAA	exon
SNP13855031	scaffold10069	36245	G/A	ACACCATGCTGCAATTCTCACC	TACCCGGCCGACACTCTGAAAC	exon
SNP13855113	scaffold10069	165003	T/C	TCACCGTGATTCTGGAGAGTGA	CCCCGGTCCAGAAGTAAGACAG	exon
SNP13855186	scaffold10069	226262	G/T	CCTTGGGTGTAGTGAGGCCTAG	GTGTTCACGCTACTGACAGCCC	intron
SNP13855303	scaffold10073	278073	G/T	CAGGGAACAAGGCTTTATGAAT	AAGGTTACAAGGCTGTCTGTAT	three_prime_UTR
SNP13855382	scaffold10087	116520	C/T	GATATCCCCATGACCAAACAAT	GATTTCCAACATACTGGGAACA	exon
SNP13855457	scaffold10087	273160	T/C	AATAGAAACCGGTAACCTGTTG	TTCTTCCGGACCACGTATATTT	exon
SNP13855584	scaffold10087	502629	C/G	CAACAACTCAAAACCAACAGAC	CCAAAGCAGCTTTGACGACAGC	exon
SNP13855823	scaffold10089	167466	A/G	ATGAGTTCCTACAGCACATACA	AAGTGAAAAGTTGACGACGGCC	intron
SNP13855851	scaffold10089	176531	A/G	CAGAGGCTAGAGTGGGGTTAGT	CACACAGGTTCTCCAATCTACC	exon
SNP13856209	scaffold10097	360709	T/A	CAAACACATGTCCTAGGTGAGC	ACTGACTACACATAGCCTCAAT	intron
SNP13856320	scaffold10107	82124	A/G	AAGGGAGGTGACTCTGCTTCAA	CAGTCCTGAAACAACAGACCAC	exon
SNP13856441	scaffold10107	176093	C/A	ACACAGACATTGTCAATATCGC	GTGCGTCTGAATGTGGACTCGT	intron
SNP13856549	scaffold10107	230839	T/C	TTTTCTGTTGCTTCAGGGTCTG	TGATGTTCGTCCTTCTTCAGTC	intron
SNP13856718	scaffold10107	317090	G/A	ACTGAGCTACCTGGACATTAGC	ATTAAGTGCAGCTCCGCTTCAC	exon
SNP13856803	scaffold10107	355823	A/G	CTGTCATCATGACGTGTGGTCC	TACGGCTACGCTACGATGGATA	exon
SNP13856957	scaffold10107	446172	G/A	CATCAAATGACTTGCTCGTGGA	GCTGGTAACATTAACAACAGCT	intron
SNP13857047	scaffold10107	548088	A/G	TCCTGTATACTGACTACCTTGC	CCTAGGTTTATGGATGTATGCC	three_prime_UTR
SNP13857091	scaffold10107	578976	T/G	CCTTGACACATGCCTTTAAGTA	AACGAGCTACCATGTCAGGTGT	exon
SNP13857245	scaffold1011	49851	C/T	CAGCCGCTCCCCGTTTATCAAG	GCTCTTCTCCCGCTGTCTTCAA	three_prime_UTR
SNP13857273	scaffold1011	83649	C/T	ACGTTTACCTTATGTACGCTGC	TAGACTCCAACAAGTTCAACTC	intron
SNP13857308	scaffold1011	95876	C/A	GATGATGGTATGTCAAACCAGC	CCACAGCAACTTGCTCCAGTCC	exon
SNP13857477	scaffold1011	227052	A/G	CACTACCTCATTAACTCACCTG	CAGCGGTGATGGACACCACAAA	exon
SNP13857652	scaffold1011	436800	C/T	CCACCTCCATCTGAATGTCGTC	TATGTGACGACTGAGGTGACAA	exon
SNP13857693	scaffold1011	461151	G/A	AAAGGGAACATGTGCTACGATT	CGGAGAACGACCGATTAAAGGT	exon
SNP13857763	scaffold1011	506726	G/A	CTTACTTTGGAGGCGGTGGATT	GTCGCTCGAGGACTTTCAGGAA	exon
SNP13857899	scaffold1011	653902	T/A	GGAACTGGTTTTGACACTCTTT	CCATACGTGCTCCCTCCCCTAA	exon
SNP13857929	scaffold1011	717900	A/G	TAAAGGACGTCCCATACTTCTT	ACCACCACTCAAATATCTGCGG	exon
SNP13857979	scaffold1011	779695	T/C	AGAGAAAGCTCGGGAGGCTAGG	GCAGAGTAGGACACAGGACAGA	five_prime_UTR
SNP13858205	scaffold10115	155756	G/A	TTGTCGTAGAATGTGCTGGTGT	GATGAAGGGAACCTGAATGCAG	exon
SNP13858367	scaffold10115	283237	C/T	GATGTAGGCCCCAATCCACACC	CAAGCTGCTGCTGGTCAACAAA	exon
SNP13858493	scaffold10131	76549	T/C	GCTAGTACCGGTGGATACGAGG	CATACAACAAGGTAGGTCAGGC	exon
SNP13858504	scaffold10131	102173	T/C	GTAAAGCACCAAAGGCAGCCTC	GTGAACCATTCCAGAGAAACGT	exon
SNP13858532	scaffold10131	119752	T/A	CAATCGTCATATTCTACGCAGA	GCGATCATATAACCTATCAGCA	intron
SNP13858589	scaffold10131	158752	C/T	TTTCCTCCAACATCCGGGCCAT	CTCCTCCTGGACCCTCTATCCA	exon
SNP13858637	scaffold10131	234248	C/A	CTTCTCCGCCTCACAAAGACGG	TGTCAAACAAGAACTTGGTGCT	intron
SNP13858758	scaffold10131	262955	A/G	GATGTGTCAGCTTTTGTCTTTC	GCTCAGCAGATAACTGAAGGAA	exon
SNP13858803	scaffold10131	313274	C/T	TGTGTCACCAGGTAATTCTACC	ACAGTCTTCCTCAGCCTCTAGT	exon
SNP13858847	scaffold10131	323146	T/C	CCCTCTCCACATTAGCTAGGGC	TGGCTGTCTGCCCAGCTTGAAT	exon
SNP13858872	scaffold10131	364949	G/A	GGATACACCTGGCTGTGTTTGG	CAAGCTCTCCAACCAGTCTTGA	exon
SNP13858892	scaffold10131	375106	A/T	TGCCTGAGCTATTGTGGGACCT	GACCTCTCCTGGATTCTGGACA	exon
SNP13858926	scaffold10135	28094	G/C	CCATGTTCCAACGACAGCGAGT	TCCTACTTGGAGAGCTGTCGAA	exon
SNP13858991	scaffold10135	78389	T/G	ACTTTGTTGTGGCATTCACTGT	TTGCAAAATGATGTGCGTGGCC	exon
SNP13859120	scaffold10135	130760	T/C	CTGGTCTTTGCCTTAGCTTTTG	TTAACTGGATGTGGCGAGATCT	exon
SNP13859410	scaffold10157	9603	T/A	ACTGTAGATGCCGCAGTAGTTG	CAGAAGGACAGAATGCCGTCAG	exon
SNP13859491	scaffold10157	93919	T/C	GTCCAAAATTTGAACGTTCGAC	TCGAATCGACGTCACGTTTACC	exon
SNP13859615	scaffold10175	59882	G/A	ATGCCCTGTACGAAGAATCCCA	CGTCTTCTTCTGGGCAAATACA	exon
SNP13859713	scaffold10175	113029	A/G	GTTACAACTCCTCCTTCGCTAC	CCCATGACAACACGACTCCTTG	intron
SNP13859714	scaffold10175	113160	C/T	TCGGCGTCCTTCTCAACACTGG	CCATAGTAACTGCGCGTCTGGC	intron
SNP13859721	scaffold10175	115412	T/G	TCCGTTGCAGCTTCCTGCTTTG	GAAGTATCGGTTGAGAGAGAGG	exon
SNP13859741	scaffold10175	137478	A/G	CCACCACAGTAATGAGAAGGGC	ATCCCAGCAACACTACGGAGAT	exon
SNP13859832	scaffold10175	235336	G/T	ACTGGTACAAACTGGGACCCCA	GCAGCTCTCTATAACGCCACAC	exon
SNP13859922	scaffold10175	293091	T/A	CTTGTATCTGAAAGCGTCGCTG	CAGCAGCAAGACAGTAACGACC	intron
SNP13860153	scaffold10183	146165	A/T	GCTACCGTGTTGACTATGCCGC	CAGATGCCTACACATATGCCCC	exon
SNP13860289	scaffold10185	47544	C/T	CTGACGTCACAAACACGTCATT	TGATGTGTTGTCGGGTATAGTT	three_prime_UTR
SNP13860412	scaffold10185	395801	G/C	ACCCAGTGAACCATGGAAGTGT	TGGGTTACATGCCATCCCTCTA	exon
SNP13860527	scaffold10185	426222	C/T	GCTTCCAATCGTCAAGTATTTC	CTTTCTCTAGCGTTTCATCGGT	intron
SNP13860551	scaffold10185	443067	G/A	TATCAATCCAAACCCAGGCTGA	GACGGGAAACAGCTTTAAGGCG	three_prime_UTR
SNP13860577	scaffold10185	465985	T/A	AGCTGTCACAATGTCATACCTC	TGTTGTGTCTGAGCCAGTAGTA	exon
SNP13860578	scaffold10185	466030	G/A	AGTACGCCTCTCTAAAGTCATC	TGATTCGTCCTCCATCACCAGC	exon
SNP13860583	scaffold10185	467975	T/G	TGGGCTGATGCTCAGATACAGA	TGATGGGGATGTTGTTCTTGGC	exon
SNP13860596	scaffold10185	475254	G/A	TCTTAAGTAGGGTGTCCTGCTT	GCGACATCTTGATAATCCAAGA	exon
SNP13860607	scaffold10185	507615	G/A	TCGGCCTGTATATTTCCTCCGT	CCTGTATGGGCAGTCTGTATGG	exon
SNP13860840	scaffold10185	869714	A/G	GTGACAACATCCCAGACGCACT	TGACGTACCAGTATAGTCCAAT	three_prime_UTR
SNP13860862	scaffold10185	885573	G/A	TACAGCTGTATACACTGAACCA	AAGTTATCGTCCGTGGGACAGC	exon
SNP13860939	scaffold10185	969430	G/A	CTTTAGGTTCCGGACCAGCCTC	GATAGTGGAGGAGCTCAAACTC	exon
SNP13861015	scaffold10191	94895	C/A	ATGCATGTTTAGTGGTCGAGGT	ACTGTTTCCGGTTGACAATCCA	exon
SNP13861251	scaffold10201	239005	C/T	TAAGTCCCCAATATTGGCCCTC	CCAGGAGGCTACACTCTCTGTT	intron
SNP13861276	scaffold10201	250972	A/G	ATTTCAAGTTAGTGGGGCTCAG	ACGTAAACCAACCAATCCGTTT	exon
SNP13861480	scaffold10201	725234	T/G	TGTGTGTTGACCAGGGAGAGGT	CACATTACCGGTGTATGGACTG	intron
SNP13861542	scaffold10203	603788	T/A	TCTGGACTTGAATGAATGCACG	CGAAAATGAAATTGCCAGCGTA	exon
SNP13861553	scaffold10203	630142	A/G	CTCGTTGTCAAAAGGACGCTTC	ACCAACAGCTAGGAAGCGTATG	intron
SNP13861593	scaffold10203	650295	T/G	AATCGGTTTCAAGGATGACATC	GTTTTCAAAGTGGCCCTCGGAA	intron
SNP13861595	scaffold10203	650374	T/C	AGGTACTGATGTCCACCGTAGT	TGTTCGTAACACACCCAACTAC	intron
SNP13861599	scaffold10203	651024	T/C	CTGTCCTGAAAACCAGAACCTA	TTAGGATTCTCGCTTGTGAAGG	exon
SNP13861612	scaffold10203	655670	G/A	CTGCGGTCCTATAGCACCAGGA	CATCTTCGCAATCTGGCTTTGA	exon
SNP13861842	scaffold10209	302765	G/A	ATGTCCGAGATGTACTGATTCT	CCGATGGACAATCTTCTGACCG	intron
SNP13861897	scaffold10209	317717	C/T	ACACCATCACAGAGGCAGCACT	TTGTACGTGAGGAAAGTTTCAC	exon
SNP13861920	scaffold10209	333303	G/A	TGACTCATCAACCCACATGTCC	ACCGTAACCCTATAACGTCCAA	exon
SNP13861964	scaffold10209	452102	G/A	GACCGCTAACTGTATCGTCCTC	CATTTACCTCTCCCGGAAGTTG	exon
SNP13862	scaffold83	231035	T/G	GTAAGGGGCGGGGTCTTTTACA	TCGGAACACGGGTATAGATACT	intron
SNP13862033	scaffold10209	580686	A/T	CTTTGGACAGAAAGGGGAAATG	GGAAACCAGTGCAGAATAGGAG	intron
SNP13862120	scaffold10209	787698	C/G	TTCAAGTCCTAAATGTGCCACA	TGGAACTCTTCTTTGCGGGAGA	intron
SNP13862309	scaffold10225	286975	C/T	CATCCTCGTCCATAAGAACCAC	TCCCCGTCACAATACTCCCTTC	exon
SNP13862359	scaffold10225	655594	C/A	TGGATAACTCCAATCGCACGTA	ATCGTTGTGTCAGCTTGTACAG	three_prime_UTR
SNP13862387	scaffold10225	675492	A/C	TTCGGTTCTGGAGAAATCCTTT	CCTTCCTCAAGTCTTCCTGCTT	intron
SNP13862405	scaffold10225	703407	C/T	ACCACATGCCAAGTTAACCTGG	GTGCAGAGAGTTCCTGATTGTC	five_prime_UTR
SNP13862645	scaffold10227	161575	C/T	GGCTGTTGGCCTTCTCCTTACA	TTACCTTGCCAAACGTTCCCTT	exon
SNP13862671	scaffold10227	188790	T/C	CTCCAGCAAACCATTGGTATCC	TGCTGACTCGGTGAGTTTCTCT	exon
SNP13862716	scaffold10227	222063	C/T	CACTAGGCTTACCTTGCTTTCT	ATTTTGTTTGCAGTCCAGCGAG	exon
SNP13862728	scaffold10227	231698	G/A	AAGGAGCCAAAATGTCTACCCT	CGTTGAACAGCACTATTCGGTC	exon
SNP13862784	scaffold10227	430130	A/G	AGATGGACGGGGAGATGCTGAG	ATGGCCATAATGTCATGCACAC	exon
SNP13862811	scaffold10227	533435	T/C	AAAGCCTGGATGAGTCCGAGTT	ACAGTGTCCTCATCTCTATAGG	exon
SNP13862889	scaffold10227	598157	A/G	TACTGACGTTGGTATCACTCTT	AGGTAGGAAACCAGCCAATAAA	exon
SNP13862913	scaffold10227	619318	C/A	TGAGGACAGAGTGTCGCTAAGA	GTGATTGTCCATGGGCAGATTG	five_prime_UTR
SNP13862940	scaffold10227	696577	T/G	TGGTCAAACCCCAATCTGTCGG	GTGTCAGATTGGTCATAGGGGA	intron
SNP13863037	scaffold10227	739555	T/C	ATTTAGGCTTTAACAGAAGCCG	ATATACCTGAAGCCATGAGCAA	intron
SNP13863133	scaffold10227	761793	T/G	CATTTCCCCTTCACTCCTACAT	GCAGGATGTCAACAGGTTCTTG	five_prime_UTR
SNP13863187	scaffold10227	801382	T/C	TCTGGAGGAGGATTCTCTTCCT	TCAGAATCATCCGGTTCCAAAA	exon
SNP13863188	scaffold10227	801522	T/A	CTTTCTTTTCTCTTCCTCCTCC	ACGGTCAGTCATATTTGAGTGT	exon
SNP13863361	scaffold10237	116380	T/A	CAACAGTGGGTTTGGCTCCAAT	TAGGTGTGGCTCCGTCTATGGT	exon
SNP13863506	scaffold10239	61119	T/C	ATATTGTCGACACAAAGCCATG	GATGTTACACAGGTGAGCAGCC	intron
SNP13863645	scaffold10247	85273	C/A	CGTTGTCTGCCTATGTAAACAC	AGTGATTGGATGGGCTGAAGCC	intron
SNP1386367	scaffold8299	419130	A/G	CCTTGGTGGCTGTAACCCAGAC	CTGTCTGGTCGTTAGAGCAGCT	exon
SNP13863749	scaffold10247	294014	G/A	CGCCACGATTGACTACTCCCCT	TAGTTTTGAAAGACCTGACCCT	exon
SNP13863807	scaffold10251	189235	A/C	GTTTGACGTACAGTTACTCCGG	CCGTAGCTGCTACACCATGGAC	exon
SNP13864036	scaffold1027	210150	A/T	TTTATCGCCACCCGTATTACCA	ACCGCTTATGCCTCCAATGTTT	intron
SNP13864186	scaffold10275	23224	G/A	GGAACTGACCATCAAGGATGTT	CCAATGTCACCTCATCTAGGTT	exon
SNP13864344	scaffold10275	158049	T/A	CACCATCCACAAGTGTACCAAC	TAACATAATTCCGCTGGATTGC	intron
SNP13864564	scaffold10275	610406	T/C	ACCAGCCTGGTAACATGTACTA	ACTTCTACAACAAGTTCACCTC	exon
SNP13864608	scaffold10275	631631	A/G	CGTTCGATGTTGAGTTATCCCA	TTAAAACTGTCGTCTGCTCCAT	intron
SNP13864612	scaffold10275	646276	T/C	GACAGCTTTGGGAAATTTCTCG	TTTGCGTTGCTCACCACTGTTC	intron
SNP13864641	scaffold10275	661279	T/C	GGAGGAGGTCAAGGTCACAAAG	ACAGAAAGCGAAGCAGCAGACG	intron
SNP13864716	scaffold10275	687310	T/C	GAAACATTTCTCTCCTCACCTG	CGATTTCGTTGTTCTGCAAGCA	exon
SNP13864794	scaffold10275	766213	C/T	AGGGATACCTATACAAACGAGG	TGCTCAAGGGATGGAAACAGCG	exon
SNP13864891	scaffold10275	826746	T/G	TGAAGTGGCCAGTGTCTGAAGG	TATTCACCAGTGCCGAGTCACT	exon
SNP13864993	scaffold10275	886920	G/A	GGACCCCTAGCACAATCCAGAC	TCTAGCAGCTTTTCAGCAGTTC	exon
SNP13865077	scaffold10275	978377	T/C	CTGGACACTCGAGGATTACTTG	AAGGCTTATCTTGAGCGTAGTC	three_prime_UTR
SNP1386519	scaffold8299	429217	A/G	TGATGATAGAAGCGTTCTGTGT	ACTCAAGGATGAAACAGACACG	exon
SNP13865368	scaffold10275	1383823	G/A	CTACCTCAGGTATTTTGGGCTC	CTACATTATCGGACATGGTCAG	exon
SNP13865471	scaffold10275	1759468	T/A	CGATGAGAAGGACGATATGTAC	TCACGGCCATATTGGCAATATC	five_prime_UTR
SNP13865596	scaffold10275	1821899	C/A	AGTACAAAGAGGAATTGTGGGA	TCGGCGTCGAGTTCAACGAACT	exon
SNP13865602	scaffold10275	1834851	C/T	GACAATCATTGTTTCGGCTGTA	GGAATGGGGTCCAGCTGACTAG	intron
SNP13865655	scaffold10275	1936352	A/G	GTCTACTCACGATACTGAGGCC	CCTTCTCGTTTTCGTAGACGGT	exon
SNP13865686	scaffold10275	1972960	A/T	TCCGCGATCAGAAAACATGGCG	TATCCGCAAGGTAGGTGTAAAC	five_prime_UTR
SNP13865748	scaffold10275	2014292	G/A	GTCCCCATAACATCAAGGTCAT	CATCACAAGACATTCTCAAGGA	three_prime_UTR
SNP13865843	scaffold10275	2094899	A/G	AAACAGAAATGGGCGTATTGGT	AATACGGTACCTGGGTATGTAA	intron
SNP13865881	scaffold10275	2102881	G/C	GAGGACAATCGACGGCCAGATA	ATTCACAACATCCGGCATCAAT	exon
SNP13865884	scaffold10275	2106863	C/T	TTCAGAACTGGACATCACCGGA	TCAGTGATACCACGTGCCCATT	intron
SNP13865924	scaffold10275	2118403	G/A	AGTGTGAGTTTAGGATGATGAC	CAGTGACCTGACGATAAGAGAG	exon
SNP13865973	scaffold10275	2143423	A/T	ACAAGCAGTATACACACCATCT	CTTTCTGCAAGTAAACTGAGTG	exon
SNP13865998	scaffold10275	2181720	G/A	CCGTACTTCAGTGTCAGGTAGG	TCGATGTCCTCAGCAAGATTTA	exon
SNP13866116	scaffold10275	2282113	A/T	CAAACAGGCGGATGTTGTTGGA	GCCCGACAAGGAATTGAGCCAG	exon
SNP13866204	scaffold10275	2383460	A/G	TTGTTGTCCTGAAGTCCGGTGG	CATGGAAGGACCATCTGTTCAA	exon
SNP13866205	scaffold10275	2383565	A/G	ACAGTCAGAAGTGGAGGATACA	TTCCACTCAAGATAGGCTCCTT	exon
SNP13866227	scaffold10275	2390906	T/C	TGTCACTACTGACTCGCCACAC	GATAATCTCCGCTAGTGGCCAG	exon
SNP13866262	scaffold10275	2409095	T/C	GTTACTGTACACACCTGGTCAC	CATTCTCCCGCACCCTCAAGTT	exon
SNP13866331	scaffold10275	2563037	G/A	TTACCCTATGGTTGCCGTATTG	TGACGTACTCCTCGTTATAGTC	exon
SNP13866365	scaffold10275	2694486	A/C	ACTCTGATGGTTCTTTCTCGCC	AATGCTTCCTGGAAAGGTTAGT	exon
SNP13866383	scaffold10275	2706091	T/A	GGATTGTGCCCCTCTACCTTCA	CTCCATCACCGATTCATCTGCC	intron
SNP13866401	scaffold10275	2748760	A/G	AGTCCACAGTGGCGGTGTTGTT	GTTTCTACGACGTCCAGAAAGG	exon
SNP13866547	scaffold10275	2800703	A/G	GATGAAACAGCAGGAAGCAGCC	TCTTACACAGTGGCACTTTACA	intron
SNP13866552	scaffold10275	2802048	A/G	CCTCTGATTGGACACAATGGTG	CTCCCCTCACCATGACAACACA	intron
SNP13866560	scaffold10275	2803108	G/A	CCCAATCCAAAGCTTGGGATGA	CAAGTGTCCCCTGTCTGTTTGG	intron
SNP13866633	scaffold10275	2817902	G/A	GTTTGGTGGAGAAGGCCTTTCC	TTCCACAGATGAACCGTTTCAT	intron
SNP13866658	scaffold10275	2826191	G/A	TGATATCGGGAGGGATGGTCTG	AATGGCTCGGAGGTAGAACACC	intron
SNP13866665	scaffold10275	2828586	G/T	TGAGCTTGATGTTTGTACCTCC	CAACCACGACACACAAACTGTT	intron
SNP13866685	scaffold10275	2832280	A/G	TGGGGCATCTGTGGGTACACTT	TTCTAGTACCAGCAGGCTTCAA	intron
SNP13866713	scaffold10275	2838726	A/C	TTGTCATCCTCGTAACCTACAA	CCAAACAAAGACCTGTGAATGT	intron
SNP13866783	scaffold10275	2856536	C/T	CCTGAACCGTCTTTTGCATACC	CCCTTACATGTTTGAACTCCAA	exon
SNP13866916	scaffold10275	2928575	T/C	GCTTTGACCACTTGGCATTGTA	AACAGATGATGAAGGCGTGTTG	intron
SNP13866984	scaffold10275	2953356	C/T	CCTCTTCCTGTTCGTCCGGCAT	CTGGATGTATTCGCATCACCCC	exon
SNP13866987	scaffold10275	2953860	T/G	ACATGGATGAGGGCGATGATAT	CTTGTACTGCACTTCCAGCTGC	exon
SNP13867012	scaffold10275	2964107	T/C	GTACATCACACCACGAAGAATT	AACCAAGTGATGCAGAAATCGA	exon
SNP13867013	scaffold10275	2964158	G/A	AATGGGCGAGAGAAGAAATGTC	AGGGTGCTAATATGAGCGGAGA	exon
SNP13867014	scaffold10275	2964209	G/A	CCAATAGCTCCTGGTACATGGG	ACAAAGGTAGGAGTCTTCTTCT	exon
SNP13867101	scaffold10275	2987209	C/T	AGGTGCATCTGCAGATTTAACA	ACAGATTGTTGCAGACGATGTC	five_prime_UTR
SNP13867176	scaffold10275	3003791	C/T	TGTTTTACTCTGCCATGGCTAT	CTAACTCCGTCTTTCTTGTCTT	five_prime_UTR
SNP13867214	scaffold10275	3017048	C/T	GCAAGGGATTCAAATCCTACAC	ACTATCGCCACGAAAAGCTCTT	intron
SNP13867298	scaffold10275	3065096	G/A	TCAGCCGTAACAAGACGAAGCA	ATGCGAGGAAGTCGTACTATGA	intron
SNP13867329	scaffold10275	3091039	T/G	AGAGTGTTGCCATTTCTATAGC	AAATCACAGACAGTACTGACCT	exon
SNP13867331	scaffold10275	3091159	G/T	GTTCATCCCATGCCCACCAAGA	CATTCCCACCAAAGTCCAATGT	exon
SNP13867407	scaffold10275	3118457	G/T	AAAATGAGCCCTTCTCGCAAAT	AGGAAATGTGATACTGTCGTCT	intron
SNP13867724	scaffold10275	3366633	G/A	GGTCCTAACTGCAGGCTTACTT	GATTAGCTGTAAGTCCGAAAGA	exon
SNP13867892	scaffold10275	3456928	T/C	TCAGCTTCTCAGCAAGCTTCTG	TGGGTATCAATGCTCTCGACAT	exon
SNP13867898	scaffold10275	3459812	C/A	TACACTTGTGTGGAGCTGTATC	CCTGGTTCGACTTCACGTACAC	exon
SNP13867945	scaffold10275	3476530	A/G	CCTGGGATGGTCTGCCTCCATT	CACCTGGTGGGGTATCCATCTT	exon
SNP13867951	scaffold10275	3485060	T/G	GCATAACAGTTGGCAAGTGGTT	GGCAGCCAATGCTGGGTTCATT	exon
SNP13867976	scaffold10275	3496742	A/C	TCTCCTTCACGTTAATCCGAAC	TCCTCATGCCAGCACGTATGAG	exon
SNP13868021	scaffold10275	3560911	C/T	ATGAGAAGCCGGGTACGAGGTA	TCCATGACGGACAGGAATGTTA	exon
SNP1386814	scaffold8299	452387	A/T	GTAGGCTGTGACTCACTTTGTC	CTTTACTGAAAGTCCTGCATCT	intron
SNP13868207	scaffold10275	3767050	G/A	ACAGGAATACCCAGGCCTTTGA	GACACAGGTTGAGCCAACAGGT	intron
SNP13868448	scaffold1029	45699	G/A	CGGACTTCTTCTTTGGTTCTAC	GTGCACCCGTTTCACAAGCCTT	intron
SNP13868452	scaffold1029	46367	C/A	CAGATGAAGCAGGAGATACTCC	GGTGTCGACCCGATTATGGTGG	intron
SNP13868453	scaffold1029	46629	G/T	ACTACACCTGCCTTCACACACA	AGCAACTCCCTGCATTTGAACA	intron
SNP13868483	scaffold1029	146259	A/G	AGGACTTCCGAGTATTCAAGAG	TCCAACAGTACGTGAACGGATA	intron
SNP13868734	scaffold10293	174396	G/T	CTGAATCGGGCTGCGTGAACAT	GCTTAGTATGTAGGCCTTTGTC	five_prime_UTR
SNP13868749	scaffold10293	196065	G/A	GCGCTCTGGAGAGTGATAAATT	CTATTCATGTTCCGTTCCCTAA	five_prime_UTR
SNP13868828	scaffold10293	232670	G/A	GTGTACTGACCTTGAGAGGAGT	TTCTGTCGTGGTACTTGGTATA	exon
SNP13868869	scaffold103	12464	G/C	ACGCGTTTGAGGCCATAGCTAA	TCATGGAAGAAAGCGGAAATGA	intron
SNP13868891	scaffold103	22533	A/T	GATGACCCCATTCCTTATCATG	ATTACCGGCCGACATATGCAAA	intron
SNP13869153	scaffold10311	47691	C/T	TCAGGAGAATTTTGTTGTCGGC	CTAGTATCACAGCTGCCCCAAC	exon
SNP13869200	scaffold10311	76100	G/A	TCAGGAAGTGGCGTGAAGAATC	GAATTCCACGGTATTGAAATCG	exon
SNP13869303	scaffold10311	190537	T/C	TCTTCAGCAACATGACCAAAGA	GCGTTGCTCGTTACAGACATCG	intron
SNP13869337	scaffold10311	388221	T/C	CTGCTGTCAGTCTATGATTGAA	TTAACAATCGCTGGGCAAACAA	exon
SNP13869376	scaffold10311	480036	G/A	CACAGAAGGACAACAACGTCAC	CCAGTAATGGCGATGCTGTTTA	five_prime_UTR
SNP13869401	scaffold10311	510648	T/C	CACCTCTTTTGACGTTATGACG	CCCCTTCTGGAAAATAAACGTG	exon
SNP13869409	scaffold10313	62884	G/T	AACTCTCTCTCTAAACGGAAGG	CGACACTGAGGATTATGGGTAA	intron
SNP13869478	scaffold10313	205624	T/A	ACACAACTTTAACACTGGTAGG	GGAAATCTCGAACATCGCTTTA	three_prime_UTR
SNP13869624	scaffold10315	107777	G/A	TCCAGAAACCAACCTTGGACAT	GGTCTTTGTCGACCAAGAAGAG	exon
SNP13869700	scaffold10315	198938	C/T	GGATGGCGTATGTAAGAGGTAA	ATGATTACGACAGCTGGTCTGA	intron
SNP13869764	scaffold10315	280448	A/G	TGACAACGGTTCAGCCAATCAG	GATATCGAAACTAGCCTGCTGC	exon
SNP13869801	scaffold10315	426624	T/A	ACCAGGTGACATGGGTTGATGG	ACCACCCAAGTGGAAAAGAAAT	three_prime_UTR
SNP13869840	scaffold10315	436417	C/A	GACAGTTGTCGACTGGATTTTA	CCACACTGAAACGTAGGCAGGA	intron
SNP13870017	scaffold10317	102141	C/T	CGTATCCGGAGCTTCCCTCCAA	GGTTCATGGGCAACTTCAGTGT	exon
SNP13870116	scaffold10317	184626	C/T	CGCCAGCGATCAGTTTGAGTAG	ATTTTCCAGCACCGTTCGGTCC	exon
SNP13870169	scaffold10317	222522	T/A	AGTGCAAAGCCTGAAACAGACC	CATGGCACTAATCATTGAGGAG	exon
SNP13870265	scaffold10321	81216	T/C	GATTCTGCTGCTGCTATGGCGG	AAGACTGGAAGCATGTCCTCCA	exon
SNP13870336	scaffold10323	147709	C/G	ATCAGAGTTGAAGGCGAAGATT	CCTGATTTTACAGCTAGGTCTG	three_prime_UTR
SNP13870361	scaffold10323	170018	A/T	TCAAGAGTCCATGTGTGTTTGT	TAGGTTTTCGCAGGTAATGACA	intron
SNP13870426	scaffold10323	292315	T/G	TCATTGGTATCGCCGTTTTGTT	TGGTTTCCGGTGTGTGTACACT	exon
SNP13870459	scaffold10323	302987	A/G	AAAACACGTCAATTCCGGTTGC	CGCAGATCTCACTTCCGTCTTC	intron
SNP13870492	scaffold10323	356353	T/C	CAATAAACTTGCCCTTTCTGCC	TGAAGAGGATAACACCATCAGG	exon
SNP1387075	scaffold8299	470146	A/C	GGGATACAGCCGGACAAGAACG	GCACAATCACATCAACGTGAGT	exon
SNP13870818	scaffold10331	49057	A/G	ATCCTTTGGACGATTACCTGAA	AACTAAACACAGAGAAGCTCAC	exon
SNP13870866	scaffold10331	73503	G/T	GCAGGGTCTGAGAAAGAAACCA	TCTTGTAGGAGCTTGCCGTTGC	intron
SNP13870879	scaffold10331	92986	C/T	AAGCGCCTGGAGATTTAGCATA	GCCTAGCTGCTTCGTTAATTTC	exon
SNP13870983	scaffold10331	189937	G/C	ATCCTGCTGATGGTAAGACAGA	CGTAGTAGTAGCCGTATGGGAC	exon
SNP13871027	scaffold10331	236131	T/A	ACGTTTGTGTATCCATGGCAAC	TTTACCGTATCCTGCCCTACAT	intron
SNP13871139	scaffold10331	291723	T/C	GCATGTGACTCGATGGTCCGAC	GTGTATACATCGATATCTGCGG	exon
SNP13871186	scaffold10331	326306	G/A	TTAGAATCGTGTGAGGAAGCCC	GCCATATGTCAGATATTGACGG	five_prime_UTR
SNP13871232	scaffold10331	334737	T/G	ACATACGTGCATCCTGTAATTG	GGTAGTCCTCCACTTTCAGCGC	intron
SNP13871267	scaffold10331	406001	T/C	CAATCGATGGGAACCACTACAC	TACACGTCACAGGCTACATCAA	exon
SNP13871310	scaffold10331	418690	A/G	GCTTAAGCTGATGATTGCCATC	TTGGAATCATACACGTGGGACC	intron
SNP13871723	scaffold10331	1637508	T/A	CGTACGTCAAACAAATATGGCG	GAAATGGCGATGACAGTCAAGA	intron
SNP13871774	scaffold10331	1646736	T/A	CGTTGGATTTACATACTGTGGT	CGTGTTAGGTACTGCGTTATCG	intron
SNP13871994	scaffold10331	1840538	G/A	ATCAGCCTCCCCGTAGTCATTA	GGCGTGGCGCTTAATCAGATTC	exon
SNP13872073	scaffold10331	1929344	G/C	ACGACAAACGTCCACCGAAGAC	GAGTGGACACACCCAGTGACAG	five_prime_UTR
SNP13872685	scaffold10333	202399	T/A	TTCTGTAACAGGCTCTCTCTGG	CGTCTGGGTAGGCGAATACTCC	exon
SNP13872807	scaffold10333	308543	G/A	CCCCTAATCTCCCAGCAGTTAC	TGCAACCACAGGGACGGAATGA	three_prime_UTR
SNP13873001	scaffold10333	651565	T/C	ATGACAACGTAACAACAGCAGA	AGCTTCTATACCGTAATGACGA	exon
SNP13873172	scaffold10343	34702	A/G	AGGTTCTCCACGTCCATCAATA	CGGCAGGTACTTGTGTACGAAA	intron
SNP13873230	scaffold10343	193193	T/A	GACTATGTGCTATACAGCTGAC	GCAGACTTATGTAGACCTTGAC	five_prime_UTR
SNP13873238	scaffold10343	196462	G/A	AGGTTTGTAATTCTGATGCCAG	ATGCAGGTGATTACCACTAGTT	three_prime_UTR
SNP13873268	scaffold10343	480390	G/T	GAGGCGGTGTATAAATGACAGA	ATGGAAACAATCCGAAGGCAGC	intron
SNP13873283	scaffold10343	509496	A/C	AGGATGATGATGCCTACGATAA	CAAGCTTTGCACCAGATCAGGG	intron
SNP13873342	scaffold10343	533561	A/C	GTGTTGTTGTTGCAGACACCTG	AAAGCAAAGATTGGCAATACCC	intron
SNP13873416	scaffold10347	50421	A/G	TGTGTCCATACGTCATTAACAG	AGCTCACAACACAGGGTCCTGA	intron
SNP13873446	scaffold10347	68653	G/C	TAGGTCAGACCCTGTACATATC	AGATAGGGCTACATCCTACAAC	exon
SNP13873494	scaffold10347	134609	C/T	ATGCCACATTAGAAGATGCAGC	CCTACCAATCAGTTTGTACAGC	exon
SNP13873511	scaffold10347	157050	T/C	TGATTGGCCTTCACCAGTTGAT	ATGTCCGTCCACAAACCCACCT	intron
SNP13873525	scaffold10347	180074	C/T	ACGTGAGTAATTCCTCCGGAAC	GTTCTCTGACTGGATTTGTCGG	five_prime_UTR
SNP13873597	scaffold10349	64693	T/C	TGTACCGACGTAGGAAATATCT	AGGAATGGCGTCAGACTTTAAA	intron
SNP13873636	scaffold10353	23712	T/C	CTGGGAGCCATGGAGTGTCCTA	TATGCACACAATGACCTTCTGG	exon
SNP13873826	scaffold10359	12565	T/A	TTCCAGTACCGCTAGGGACTGT	TCGAAGTCGTTGGACTGTTGCT	intron
SNP13873856	scaffold10359	72767	C/G	CAAGTCCTGCTACCTCAGGCCA	GCTAGCCCGTTCTCACCAACAC	three_prime_UTR
SNP13874060	scaffold10359	391990	T/G	GGAGGTAAGAGGCTGTGTGGGA	AGCCCAGACAGTACTCAATGGT	exon
SNP13874144	scaffold10359	518591	A/C	TGGTAATGGCGGATACAAAACA	CCCACTATCCTCCAGCCTTGTA	intron
SNP13874313	scaffold10359	663528	G/A	TCTCCTGTTACCAGTGTCTGGC	TCACTCATCCTGTTCACCTGCA	five_prime_UTR
SNP13874406	scaffold10359	716450	A/G	CCATTTCCTCAAACACCCACAT	CTTCAGTGTCAAATTTGTCTGG	exon
SNP13874532	scaffold10359	794574	T/G	ACCGCCTAGATGTGACCAAGGT	ACTCTGGTGATGGGAAGAATCA	exon
SNP13874562	scaffold10359	799201	G/A	ATGAGTCGGCATCACAAGAGGA	ATTCTGTCAATGAGGAGCACAC	five_prime_UTR
SNP13874747	scaffold10359	911092	T/A	AAGCTGTCTATGAGGTTACTCA	AACCGCAGCCATTTACTGCAGC	intron
SNP13874901	scaffold10359	1118488	T/G	AAGAGAATGTGCCTGTGCCTAT	AACAGAGTGTACCTGCCATCAA	exon
SNP13874995	scaffold10363	25647	C/T	AGGTTCTGTGTCCTCCTGCTCC	CTCAACGTCCATGTGGGTATCT	exon
SNP13875001	scaffold10363	48245	C/T	AAGTACCCAGTGGGTTCCTTCA	AACAGACACATCCACACTTCAC	exon
SNP13875033	scaffold10363	199502	C/T	AAAGTGATACACAGCAACAGCA	GCAAACCCTTAACACTCACTAC	intron
SNP1387509	scaffold8305	7688	G/A	TAGGACAAGCCATAGTGTCAAG	GCACAGAGCTCTCACCCACAGA	exon
SNP13875107	scaffold10363	286185	C/T	GGACAAAGGGATATGTCACCCC	AAAACCAGGTTAGCAACTCATG	exon
SNP13875109	scaffold10363	287294	T/C	GTGAACAACAGTTGGTAGACTG	ACGACTATGGAAACAATGGCTG	exon
SNP13875356	scaffold10371	84913	G/C	TGGGACTAAGCTACGAGGTCTG	GGGGAAGGAAGGAATGCTAAAT	three_prime_UTR
SNP13875434	scaffold10371	117581	G/A	ACTTGACTGTTGGGGCTTGATA	AGCTGCTGGGGAACTCAAGGAT	exon
SNP13875529	scaffold10377	122645	G/A	TGTCACATTCACCAGTGCTGAC	GAGTGGCCTTGATCTCTTCCTG	exon
SNP13875626	scaffold10377	296976	G/T	CCTACCAGTGTGGTTTGTCCTC	GCATGCCGTGTGAGTTACGTTT	intron
SNP13875680	scaffold10377	350439	C/T	ACTGTATAACGTCCCGAAGGAC	TCGTCACAGAGAGGGAGTGTTT	exon
SNP13875732	scaffold10377	394772	T/G	TCCATCCATTAGACTTCATGGC	GGATTTCACCCAGACTTTCATA	exon
SNP13875816	scaffold10377	476469	A/G	ATCGGGTGACTACGTCACACCA	CGTCATAGAATACAGATCACCC	three_prime_UTR
SNP13876008	scaffold10383	33590	G/C	GTGTAATAGCCCACCACTCTAC	CAAGGTTTTCCTCCGCAAAGAT	exon
SNP13876031	scaffold10383	140092	C/G	AGCGTGTCTGTGTCTATATGGT	CGAGGAAAACAAGGGAACAGCA	exon
SNP13876123	scaffold10383	193808	G/A	CCTCTTGTGCTAGCTGTTTCCA	TGGAGTCTGAAATTCACCCACG	exon
SNP13876125	scaffold10383	200342	G/A	AACTCCTTTCGTCCCCAGTCCT	CCGGTAGTTATTAAACGGGTGA	exon
SNP13876205	scaffold10383	361603	C/T	TGGCTTCAATCCTCTCCTTTTG	CAGACAGACATCGAGCAAACAC	exon
SNP13876320	scaffold10389	51987	T/C	TGTACCTGTTACCGGGGAAGGA	TGTGTGCGATGACAATGCAGGA	exon
SNP13876345	scaffold10389	82633	C/T	GTTCGTAGTAGGAGAAGACGAA	GAGTCATGCTCTGAGAGTGAGT	exon
SNP13876490	scaffold10397	34258	T/G	GTCATCATCACCGTGAGTCCAA	CCCTGCAAGTCAATTTCCGAAA	exon
SNP13876655	scaffold10401	382274	T/G	ACACTTCCCAGAGGAAAGAGGT	AGTCCTTCTACAAGAAAGTCGT	exon
SNP13876928	scaffold10401	601070	G/A	TGTATTTGACACTCACCTGTTC	CGTTAGACAGCCGGACGTACTT	exon
SNP13876973	scaffold10401	659147	C/T	GAGCTCCAGGTTGCCTGTACGT	CCAGGCTAACAGTGAGAAGCAG	exon
SNP13876999	scaffold10403	59191	G/A	ATGACAGTGGAGAGGTCACATC	TGACAACAGGACGAATCGTGGC	exon
SNP13877088	scaffold10403	87934	G/A	CTAAACACAGCCAGATCATCAT	CACAGGAGAGAAGCAGCAGGCT	exon
SNP13877185	scaffold10403	158672	G/A	AACCGCTACCTCCTCCTTGTTG	TGTAGCCTCTGCTACCACCACC	intron
SNP13877346	scaffold10403	296069	C/T	TTGCAGATATCGGCCGTTGTGA	TACCTTTGGAACAGTGTGCCGA	intron
SNP13877370	scaffold10403	351869	T/C	TATTATTACAGGGACGGAGTGT	ATGTGTTTAGGGAGAGTTGCCC	exon
SNP13877386	scaffold10403	360957	T/C	AGATTCCTCTATCCTCTCCTGA	TCACTCTCTCATCTACCGCCAA	exon
SNP13877434	scaffold10403	432566	T/G	CCATGTTACCACGCATTGGCAT	AACCCTTCGTGGGCTGTGTACA	exon
SNP13877657	scaffold10409	168406	G/A	ACGATGGACATCTCGTCTTCAT	ACAAACCATCTGTGATGTCTTC	exon
SNP13877752	scaffold10409	274873	T/C	CAACCTCCTTGTATTCCTCAAC	CAGCCAGCATATAATGTGTTGA	exon
SNP13877919	scaffold10409	501499	C/T	ACTCATACCCACGCTGGTAATT	CCCACTCATTGTGCATGTGAGA	exon
SNP13877925	scaffold10409	505421	A/G	ATATGGCTTCTGCCAATACAGA	CTCAGGGTGGAAGTAATGGAAA	exon
SNP13878161	scaffold10409	891860	T/G	GTCCTTTTCCTCACCAGTTTTG	TTCTGCTGCACCTCATCTGAAG	intron
SNP1387820	scaffold8313	152698	G/C	AGGATTGGCCTACCCATAAACG	GTCGCGAACGGTTACGACCATC	intron
SNP13878425	scaffold10413	208975	A/G	AGGAGGGATTGGACGTGCCTAG	ATCTGGTCATCCTTTACGATCA	exon
SNP13878487	scaffold10413	326490	C/T	CACGGTGCATGGCGGTAATCAG	ACGTCAGCAACGTAAGCATGAT	intron
SNP13878589	scaffold10413	711641	C/T	AACACATGTTGATGGCAGAGGA	AGCTGTTACCCATCACAACGCC	exon
SNP13878689	scaffold10413	744352	C/T	GTTCTGCCCTCCTCTGTAGACG	CGTACCTCTCTTCCTTCTCACG	exon
SNP13878747	scaffold10415	67389	G/A	CTGCATGTTCCTGATCTACCCA	TTTTCTCCCGTCGGCAACTACA	intron
SNP13878753	scaffold10415	100687	G/T	TTCTATGACAGAGGTGACCTGT	CCCCAGTTTGAGGACAACCTCT	exon
SNP13878767	scaffold10415	199239	G/A	AATGACAAAGCAGGTGTTCAAG	GATGACCTTGATGAAGGCTATT	exon
SNP13878834	scaffold10419	19053	G/T	GCTTCTTGTTGACAGTGGCCTG	GACTGTCTTCCTTCGCCTTTGC	exon
SNP13878994	scaffold10423	419031	G/A	CACCAACTCCAACAACCGCAAC	ATTCCCGGATTTTCTGTTACAG	exon
SNP13879124	scaffold10427	125887	C/T	CCTCATTTAGCAGACGCCATTT	GAACATGGTACCGCCATAAATA	intron
SNP13879227	scaffold10429	119045	C/T	TCAAGAAGTTCATGGAGCGTGA	CAGAGCTCAACTTTACTCTGAT	intron
SNP13879267	scaffold10431	16326	A/G	TACCTTCAGGGTTGGTTTCATC	TGCTCAGAACATCCTTGTTAGT	exon
SNP13879367	scaffold10431	64132	G/T	CCTTACCTTCCTGTCTGATGGA	TACTTATTGGTCTGTTGGTGGT	exon
SNP13879465	scaffold10433	3432	G/T	CAGCCCCAAAACTCTTTACAGG	AAGTTGACTCGTCGACATCACT	exon
SNP13879667	scaffold10439	247629	A/G	TGTAGTAAACATGGCAGTTGCG	CATGCTGCATTTTATGCTGCAA	exon
SNP1387970	scaffold8313	178094	G/T	CGAGAGTTACTGGATGTCCGCA	TGGACATTGACCAGAGAGTTAC	exon
SNP13879748	scaffold10439	280306	G/A	ACGTCCACCACTTCTTTCTGTA	TTCTGCTCCTCCTCGTGTTTGG	exon
SNP13879850	scaffold10439	421981	C/T	GCCCTACCTGCTTCAACGACTT	ACTCCCATCCCTGACTCATGGG	exon
SNP13880026	scaffold10441	36567	C/A	TGGGCAATACCTACCAGATGGT	AGAAGTCAGAGAAAGAATGGCG	exon
SNP13880119	scaffold10441	85896	C/A	TTACTCTCATCGTCGTCGCCGG	GCCTTCTTCCAAATCTGTCTGA	exon
SNP13880182	scaffold10441	130994	A/C	TAGAATGTGATGCGTTGTGTTC	TGCAGAATTAAAACACGAGCTC	three_prime_UTR
SNP13880220	scaffold10441	166947	T/C	GCATGCCAAACTCCCGGAGAAC	GGAAATTCGTGCTGCCGAGTTT	intron
SNP13880421	scaffold10441	340920	T/C	CCTCAGACTTGTCAACAGGCTT	ACGGCCAGGAACTTGAATTGGA	exon
SNP13880458	scaffold10441	378490	C/A	TCAAGAAGACGAAGAAGAGAGT	TAGAGGAAAATGATGGAGGTGC	exon
SNP13880497	scaffold10441	409416	C/G	TCGTATGGATGTGTAAGGCCAC	TCACTGGATGTGACTGAACTTG	three_prime_UTR
SNP13880691	scaffold10441	536850	T/A	TTAGCCATTTTGTGGATGGTCG	GCACTGGGAACTGGATGTCCTT	exon
SNP13880748	scaffold10441	571923	A/G	TCAGGGAAAACACAGAGGGCGA	CCAATCTTGAGCATGAGGTTTG	exon
SNP13880847	scaffold10441	752671	A/T	TAACGAATACGGGACACGATAT	TACACATAGACGACGCCTATAT	exon
SNP13880899	scaffold10441	797506	G/A	TGTGTTCTCCAGTACAAAGCTC	CCCCTTCTTCTGTACATTCATT	exon
SNP13881054	scaffold10447	184731	T/C	AATGTCATGAAAACGCCGTGTG	ATATGGCCACCCGTTATGGCTG	exon
SNP13881129	scaffold10447	212842	T/G	TGAGCACCAGGTCCTGGTTTCT	GTGTCACCAGGCATCATATTTC	intron
SNP13881134	scaffold10447	216459	A/G	CCTTCTCTGGGCTGTATGCACC	CTGGCACTTTGAACACGGAGAG	exon
SNP13881246	scaffold10447	290379	A/C	GTTCCAGTTCATCTTGAGATGC	GTCCCTATAGATGTGTTTCCAG	exon
SNP13881295	scaffold10447	360757	C/T	CCTTGCTGAGGTACGTCTGTGT	CCTGAACCTAAGCTTTGCCCTA	intron
SNP13881306	scaffold10447	374503	C/T	CTTCAGCCGGTACCTTTCCTTC	CAGATGTTCCACACGCTAACGT	exon
SNP13881356	scaffold10447	446022	G/A	GAATAATTGCTGGAGGCACAGC	TCTTTGTCAACCCATTGGATGG	exon
SNP13881371	scaffold10447	470371	A/G	AGCCAGACGATGATGAGGGTGG	ACATCAATGCTGCCAAGCAACG	exon
SNP13881396	scaffold10447	507803	A/T	AGTCGACAACCAGATCGTGTTT	CAGCGACAAATCTAAGTTCATG	three_prime_UTR
SNP13881471	scaffold10447	782096	A/G	TACAGTATGTACACTGGACACT	CTCCCCTGCCCATGTAGTAGAA	exon
SNP13881480	scaffold10447	787350	G/A	ACCAAAACTCTAGCCAATTGAG	GCTGGTCACTGATAGTTGTCTG	intron
SNP13881643	scaffold10447	971210	A/G	CAAGGAAAAGCCTGCCTATTGT	AACTGTCCCACTCAACAGAGTG	exon
SNP13881653	scaffold10447	1002138	A/T	GGTAAAGGATAGCACCAGGTAT	ACACAGGTGTTCATTGTTGATG	exon
SNP13881686	scaffold10447	1073818	G/T	CGCGTGCTAGGATTTCTTCTCG	AGGGGTATTTAACACCTGGCTA	three_prime_UTR
SNP13881846	scaffold10447	1322560	A/G	GACCCTCAGGCTTGTGGATGGT	TTATTTCTGACGATGTGGCGGT	exon
SNP13882109	scaffold10455	116730	A/T	AAAGGCCGTGTCCGTTACCACA	CAACGGAGAAACACGAACAGAA	five_prime_UTR
SNP13882124	scaffold10455	188156	C/T	AGCTCCAGCTCCTCAAACAACA	CCATGTTGATGGAGCAGCTACA	exon
SNP13882291	scaffold10455	282422	T/C	AAGGTCGCACGGTTCAGAGAAG	GACGTTCAGAACAGGAACGTAG	five_prime_UTR
SNP13882347	scaffold10455	299656	C/A	GGGGTGTTGGGAAACCCTTCTT	TAAGCGCGCATTCTTTTGTCGT	intron
SNP13882368	scaffold10457	55198	G/A	TACCTTTGTGTTTAACAGAGCG	TCAGTCGGTGACCGGTGGTTTC	exon
SNP138824	scaffold893	159883	G/A	ACTTTAGGATTGCTATCTCCCA	TCATGCATGTACTCCTCCAAGT	exon
SNP13882452	scaffold10457	155239	C/G	GCGGACAGTTATCCATCCTACA	CTTTGTCCGAGCATGCTGTAAA	intron
SNP13882762	scaffold10475	88984	A/C	ACCTGGCAGTCACGATTGTTTA	TCAGGCGGTCGGTTGTTGAACA	intron
SNP13883213	scaffold10477	432597	A/G	CAATGATGTCATCCGCGAAAGC	CGTGATTGATCAATCTACGGAA	exon
SNP13883250	scaffold10477	480108	C/A	CCAATTTCCACACAACCACAGC	CAGTGGCCAATACCAGCTGGAC	exon
SNP13883258	scaffold10477	493439	T/A	CCTCACATTCTTTTGCATTTGC	TCTTTCCTTTCAGCTGGGCTAT	exon
SNP13883263	scaffold10477	494700	G/T	CCACATTGTGTTGGTCGACCAT	CGCGTTCAGTGTCGAATTCCTC	exon
SNP13883456	scaffold10477	687784	T/C	ATCTCCCAACGTTATAAAACCC	GAGCGGACAGGATATTAGAGAT	intron
SNP13883480	scaffold10477	717697	T/C	TACTGTCGTTATGGAGTTGGTA	ACATTTCCATGATGGAGGACAC	three_prime_UTR
SNP13883542	scaffold10477	770469	C/A	TTTCCGGGTAGTTATCTTCCAG	TCACCAGGTGTAAGTACATCTG	exon
SNP13883625	scaffold10477	885627	T/A	CACATTGTCTTTTGTAGCAAGC	ACACATTTCTTGGTCCTTCTTC	exon
SNP13883777	scaffold10477	1130065	A/C	CAGGGTATCCTAGTGTGTACAC	TTTCCGAGTACCGTAACTGGAT	intron
SNP13884178	scaffold10479	503686	G/T	CACTGGGGTCGATGGATGTCCT	TCTGTACATTGTCACCAACACA	exon
SNP13884459	scaffold10479	705129	T/G	GGCTACGGCATAGGGATACTTT	CATACCGTTGAATCCTCCGACC	exon
SNP13884562	scaffold10479	820793	T/C	TCACCGCCTACAACAAAGCGTC	ACCCGGTCCTTGTTCACCATCA	exon
SNP13884579	scaffold10479	844334	T/G	ATGCAGGTTTACACCCGAACAG	CTAGCTCATCCATGTACACCAT	exon
SNP13884743	scaffold10479	915693	A/T	GAAATAATGGGAAATCGGGGCT	AGTTCGACTACTCAAACTAAGC	intron
SNP13884901	scaffold10479	1010595	G/A	ACCTGGAGAACTGCCTCTTGTA	CCTCATCCTCACCCTGTAGATG	exon
SNP13885027	scaffold10479	1060961	G/C	AACCAGCAGAGTCAACAGCAAG	TCAGACCATAAACCAGAGCCAA	intron
SNP13885060	scaffold10479	1072576	G/T	TGCCGTTTGAAGTCGTTTTAGG	TTCTCCTTGTCGGATAAGTCTT	intron
SNP13885087	scaffold10479	1087929	G/T	TTAGTTCAAGCAGACATGGTTG	TCACTGACTGATAACGTCTGCG	five_prime_UTR
SNP13885188	scaffold10479	1145813	T/C	CGAGATATTTGTCACCTGGTCA	ACTCTGTTGAGGGACTACCACG	three_prime_UTR
SNP13885222	scaffold10479	1162346	G/A	CAAACAAAGGAATGACGCTGCC	GTAGAAGCTCAACTGCCCCGTG	intron
SNP13885324	scaffold10479	1214726	T/C	TTTCACCTCCTCAGGGACTCAT	CCAGTAAGGAGCGCAGCAAGTT	exon
SNP13885473	scaffold10479	1352808	C/T	GTAGAAGTACAGCCTTTTGCCT	GGCGAATATACTTGGGCCACTT	exon
SNP13885484	scaffold10479	1360087	T/C	ACGCCAAACTGTTATCACTCCG	ATATGGCTGTCGACTTGTTTGA	intron
SNP13885580	scaffold10479	1415137	T/A	GACTTCGGGAGAAGAAACGACT	ACAACTTTCCAAGGTCATCGTT	three_prime_UTR
SNP13885593	scaffold10479	1471139	G/A	TTTGGTGCGGAGGTTCCAAACG	TGAAGCAATATCAGGCCCTATC	exon
SNP13885780	scaffold10483	86765	G/A	AGGATGAAGATGTTGATGAGGA	ACCCAGAGGAACTCCCTATCAG	exon
SNP13885796	scaffold10483	96854	G/A	TCACTCAGGAGTTTGTAGAGGC	CAGACCTTCAGCTCGGGGAACT	exon
SNP13886063	scaffold10485	222424	G/A	CACCACAGGTTGTAGAAGTTCC	CACAACCGGTAATGGTACCACA	intron
SNP13886110	scaffold10485	267520	T/G	AAGGAAAGACACACTGGCCGTC	TGGCGACCTCTGATGACCTTTT	exon
SNP13886149	scaffold10485	299606	C/T	TCCTCCTCAAACTCTCCCACAC	ATGGAGGGCTTCTTTATCCCAG	exon
SNP13886163	scaffold10485	328072	C/T	CACCCAACCTGTCTGACCAAGA	AGCATGGACTTAAGTACACAGA	exon
SNP13886179	scaffold10487	40789	A/C	TTTACCAGGTGTCATAAAGGGC	CCTTCTTGATATTGGTACGGGT	exon
SNP13886197	scaffold10487	61424	A/G	GCAACTGTCAAAGGAGTCAATA	AGAAAGGTTCCGAAATACAGGA	exon
SNP13886245	scaffold10487	147852	C/T	GTATCCACTGTACACGCCTGGC	ACAAGGCCAACAACTGGTACGT	exon
SNP13886304	scaffold10489	42663	T/A	CTGAATGCAGCACCTCCAGATA	GGAGCAGTTGGGAAAATGTCAG	intron
SNP13886328	scaffold10489	198384	A/C	GGAAGAAGTGCGACAGATGATT	TCAAAGTAAACGACGAGGTTCT	exon
SNP13886539	scaffold10497	104343	C/T	AGTTCAACACAAACAAAGTCGG	TTGTGCCTGTTATCTGGCATGC	three_prime_UTR
SNP13886625	scaffold10501	104977	G/A	TCCGCTCTACCGAATGAGCTTA	ATTTCGTCCTAACCGAGTTGGT	intron
SNP13886853	scaffold10513	72999	T/C	CCTGCGGTAAGAACGATGCTAA	CGATGTTGTACGAAGCCACAGT	exon
SNP13886871	scaffold10513	93808	C/T	ATGCAGCCAGCTTCCAGGAACA	CGGTAAGTGTCATTTGAGATGT	exon
SNP13886902	scaffold10513	171490	G/A	TAAAATTTGCCACGTCATCGCA	ATCCCATAGTTGTTGTCGTCAT	exon
SNP13887026	scaffold10519	70062	G/A	TTGAATGGTCTGAGAGCGACTG	AGTGAGAATTTTCTGAAGCCGT	exon
SNP13887189	scaffold10523	69466	C/T	TTACCTGTCTAATGACCGGCTG	TCTTCCTGATTGACTTCCGCGA	exon
SNP13887288	scaffold10523	221266	T/G	GGGCCAACTGTGAGCTGTATGG	CTGAGGCCGATCTCAAGGTGGA	exon
SNP13887330	scaffold10523	299829	C/T	CCCACCTGTCTATATCTTCCTC	GGGCTCTCACGTTAGACTCCAA	exon
SNP13887341	scaffold10523	318906	A/G	CCGGTCATTTCTGGACCTCTGG	GGATGACCGAGAGAAAGGGTGG	exon
SNP13887424	scaffold10523	561917	C/A	TTTTCTACGCAGCTGGTGATTC	ATCAACAAAATGACGCTGAGGT	five_prime_UTR
SNP13887612	scaffold10523	920235	T/C	GTTCCCTGTCCATAAGCTGCAG	TTGTAGAACAACTGGTCCCTGA	exon
SNP13887663	scaffold10525	216002	A/C	TAATCACTGAGGGACACAACAT	CCTCATACTTGTAACCAGCACA	three_prime_UTR
SNP13887700	scaffold10529	210347	A/G	ACAGTATGTACTACAAACGTGC	AGGGGCGAATACAAGATGGCTA	exon
SNP13887896	scaffold10529	331293	G/T	AATATCACCGATAACCCACCTT	GTTTGTCCTTGCTCTTTGCCTC	exon
SNP13887912	scaffold10529	356277	C/T	ACTTCCCTGATGCCGAGGTCAA	CATCCAGGAATCTGATACAACA	exon
SNP13888066	scaffold10529	446634	G/T	CTCACGGTTACAACTTTCCCTT	GCGCCGTATGTGGTAGTGATGA	exon
SNP13888096	scaffold10529	461371	G/T	TAGTGTCGCCACCGTAATCTCC	TGTCTTTAACCCACTGAAGAGC	intron
SNP13888251	scaffold10529	541951	T/C	CTTCTGCTTTGCCTTCTTACAT	ACGTAATTGTGCCCCTTAGAAC	exon
SNP13888545	scaffold10529	714829	G/C	AAGAGTACAAAACACGCCTGTT	TCTGTGGCCTCAAGAAGTCGAT	exon
SNP13888630	scaffold10529	765411	G/A	GTGCTTCCGTTAATGGTAGATT	CCCTGACCCTATACCACTAATA	three_prime_UTR
SNP13888818	scaffold10529	888096	G/A	CGTCTTCATCAAGGTCATCCTC	TTGGCAACACCATTCCTCCGAC	exon
SNP13888919	scaffold10531	38632	C/T	ATGGATGTGCAGAACTTGGAAA	CGAAACAATCTCAGGTTTCGGG	exon
SNP13889258	scaffold10531	304050	T/C	GTGATCGCGAGAGTATGGAACG	TGTACGATGAGGAGGATGACGA	intron
SNP13889350	scaffold10531	569167	T/C	AAACTGGAACTCGATTCCGGCA	ATCATGACCAGCAGAAAGATTG	five_prime_UTR
SNP13889392	scaffold10533	27438	T/C	ACAGAGTTGTCGGTGGATGTTT	GCTCCATTCAAAACAGACCGGG	exon
SNP13889730	scaffold10537	50996	A/C	GGAATGTCATATGGGTCGTTCA	GTATGCACTACCGTTACGCTAC	three_prime_UTR
SNP13889802	scaffold10543	13698	A/G	AGTGACGTTTTGGTACGGTTAC	GTCCCCGGTAAAGAGGGCCTTT	intron
SNP13890179	scaffold10553	233040	G/A	TAAGGTCAGGTGTTATGGAAAC	GTGGCGCTGTTAAGATTAAAAC	exon
SNP13890355	scaffold10555	53154	C/T	CAGACACAAACATCCTCTCCAG	TGGAGGACAGAGGAGCCGTACA	intron
SNP13890363	scaffold10555	100363	C/T	GTCGTTACGCTGCTGGCATCAT	GGAATTACAAGGCTGGTCAGAC	exon
SNP13890380	scaffold10557	28318	A/T	GGTGGGGTCTGCGACACTAACA	ATAGTCTAACAAGAGGCCCATG	intron
SNP13890510	scaffold10565	10150	C/A	ACGCAAAGCTCATGCAAGCAAT	GGGAATTCGATCAACAATGGTC	exon
SNP13890518	scaffold10565	19148	C/A	ATATGTTGTACCCATGGACAGC	TCATCGGTGATGATTCCGATAC	exon
SNP13890549	scaffold10565	158510	C/T	TGCATACTCATCAATTTCCAGC	TCTACGACCGGGAGTTGAAGGA	intron
SNP13890593	scaffold10565	217175	T/C	GACGATTTTGTTGGCCGTTCTG	TTTTGTGTCCGTTCAGGCACAG	exon
SNP13890633	scaffold10565	224437	G/T	ATACCTAGGCCAGGTGACATTT	CGCAGAGTTTGGGTCACTGAAA	intron
SNP13890651	scaffold10565	264299	G/A	GCCGCTTCCCCGGATACAATAC	AACCATACGGTTGTATGATGCA	exon
SNP13890786	scaffold10565	369021	G/A	TTGGACGAGCAAGACGTACTGA	AGACGACACGAGTTCTGTCTTC	exon
SNP13890843	scaffold10565	464297	A/C	TGTTGACCATATCGTGAAAGGG	GCTCCATCTCTTGTTTCCTATT	exon
SNP13891168	scaffold10573	193044	G/C	ATTTCGATATCTCCACACGTAC	CGTGCAAATAGGAAAATGTAGC	exon
SNP13891190	scaffold10573	227452	G/C	CGAAATGGTCAAACTGGGTATC	GGTGGAACTGGAACTTGCTTTC	exon
SNP13891321	scaffold10573	425109	A/T	CTGGTTCTCCTGCGTAGGTGCT	TAGTCCGGGGAATTGGTGGGAA	three_prime_UTR
SNP13891363	scaffold10575	205156	G/T	GAGAACCAACCACAAAGGATAA	ATGGCCTACAGGACTAATTCCA	five_prime_UTR
SNP13891441	scaffold10577	23598	T/C	TTCACAGCCTCACACTTTAGTC	TCAGTGTCACCAACACTCCCTG	exon
SNP13891551	scaffold10583	49708	A/G	AAGACCCAACAGGCCTTATAGG	ACTGTTTCTCATGACATCACCT	intron
SNP13891590	scaffold10585	75653	G/A	CGGAAGAACGAGTACATTAAGA	ATCGACGAAGACGTGTTGTCAC	intron
SNP13891727	scaffold10585	318093	G/T	ATGAATCCGAGGAGGAAATGTC	TATCTGATGAGGATATGGACGG	exon
SNP13891767	scaffold10585	330860	G/C	AGCAGGTAGCCATATTGACTTT	GTTTTGTGATGTCGTCGCCAGT	intron
SNP13891837	scaffold10585	368378	G/A	GGCAATTTATACCGGGGTTATC	GCCAACCAAACCCAAACTTTCG	intron
SNP13891895	scaffold10585	438630	A/G	GTAGCAATATCCCCTCGTCAAG	GCACCACCTTAGGAGAGAAAAG	intron
SNP13891947	scaffold10589	22134	C/T	GTCGAAATATTTCGACGCCATG	CTGCCAAAATTAAATCCGGCGT	three_prime_UTR
SNP13892075	scaffold10589	234835	G/A	CGTTCGCACACTTTGCGTCACT	GTTGATGATGTTGGGGTACCGA	intron
SNP13892098	scaffold10589	341115	C/T	CACCTGTCAAGCCAGCAATACC	CCACTAATTGGAGTGGTGACGG	three_prime_UTR
SNP13892187	scaffold10589	477531	C/G	ACCTTCAGTTCAAAAGGTCACA	AAAGTGGCGGGGAAAACCTGGA	intron
SNP13892326	scaffold10589	642373	T/C	TGATGAGGAGAAGACATTCCAA	GGATAGCCTCCCTTCACTTCCT	exon
SNP13892462	scaffold10589	794443	G/A	GTGATTCTTACGTTCAACACCA	GCTGCTCAGATAATTCTGAAGA	exon
SNP13892569	scaffold10591	104540	C/T	CCACATGCAGCACTGTTCAAAC	CTCACTTCAATAGTGTCACCAG	exon
SNP13892583	scaffold10591	124208	A/G	CAAAGCTTCCCATTCGAAATCA	TTTCTTCCATGAAGTTCCTCCT	three_prime_UTR
SNP13892764	scaffold10591	280320	T/C	ATCCAGCCAAAACACGTTATCA	GGGCTTTGGTTATTCAGAAAAG	intron
SNP13892819	scaffold10591	359764	T/C	GGTCACAGCTGACTGAAGCATG	TACAGGACAAGGACAAGAGTGG	exon
SNP13892830	scaffold10591	377807	C/T	CCAGTCAGGTGCATCACCTCTT	TCTATGTTCATCCCTACCACGG	exon
SNP13892964	scaffold10591	582948	G/A	CTGGGTTATCGGCCTTGATTCT	CAGCATATCCTCCGCTTGGAAT	exon
SNP13892993	scaffold10591	599452	G/A	TTTGAAACAGTGGGCGCAATAT	GTACTGCTGTCTGCTATGGTTA	exon
SNP13893226	scaffold10591	1572580	T/G	TCGTTGAGCATCGGACCAATAT	ACAGGTGAAGGTGAGTGCTTAC	exon
SNP13893262	scaffold10591	1642123	T/G	ACATTTTGCAGTTTGACGGAAG	TCCCATCCCATTCCACTTGGAC	exon
SNP13893320	scaffold10591	1664147	G/T	TGTGCTTCTTACATACCACCAG	TGGTACACAATATCAACACGCA	exon
SNP13893352	scaffold10591	1731249	G/A	ATCGGACAGTCTTGGGACGATG	CATTCCTGTGCTGTTTGCGATC	exon
SNP13893367	scaffold10591	1754002	A/T	ATCACTGTTGTATTGATCGCCT	CGATACAAGCTCGTCACCGATA	intron
SNP13893566	scaffold10591	2060738	C/T	GGGCTGTTTAAGGTGTGTTTGA	AGAAGAGCTGTCTAAAGTGGGT	intron
SNP13893646	scaffold10591	2126035	C/T	CCCCTAATTCCGTACCTATTCA	CTGTCTTAGGAGGCGGAGGTTT	intron
SNP13893670	scaffold10591	2138178	G/A	GAGCAGCCTTGTCGTGACTCCT	AGGCGTTGGTGACGTAGGCAAT	exon
SNP13893719	scaffold10591	2193991	C/A	CCCATACATGTGGCTATCTCAT	CTAATAGTACTGCTGGCAGCAT	three_prime_UTR
SNP13893726	scaffold10591	2237663	G/A	GGACGAAAGTGGATGACAAGTC	GTATCCGTGCTTTCCTAACCTG	exon
SNP13893727	scaffold10591	2237741	G/A	ACACCCAGTATGTTCCTCAGCA	TGTTGCTCTGCTGTGTGCTCAG	exon
SNP13893779	scaffold10591	2277437	G/A	TGGCTGTGGTAAACAGGATATT	CACGAAGGATACTTGTGGTACA	exon
SNP13893826	scaffold10591	2300562	A/G	GTGTGTAGTACCGGTAGTGGGG	GGAACCGGTCATACTTCATTGT	exon
SNP13894022	scaffold10593	31826	C/G	GAGCCACTACCGGCCATTGAAC	ATGGAACCACAGCAGACGATGG	intron
SNP13894135	scaffold10595	25355	C/T	GGAAAAGATGTCTGAAAACGCT	GTGACAACGTCCTGGTACACGC	intron
SNP13894181	scaffold10595	73479	G/A	GTGGTTAAGACCTGGGAAAGAA	TTCCCTGAAGCACAAGCACAGT	intron
SNP13894205	scaffold10595	83285	A/C	GGGCAGGTAGAACGTCTTTGAC	TCTCTACCAAGACACCGCCGAC	exon
SNP13894295	scaffold10595	246865	C/T	ATCAGATAGTAAGTGGCGGTTG	TAGTCCCTGTAGGTGACAAGAT	intron
SNP13894378	scaffold10595	290926	A/G	CAAGGTTGATCTCCCCGTCCGA	CGATGATGCTGTTCCGGTAACC	exon
SNP13894503	scaffold10601	29244	T/G	TCATGTGGAGGCAGTTTCCAAA	TTTCATCCTGAGGGTAAGAGTT	exon
SNP13894684	scaffold10603	175283	C/A	TCACTGTCAATGCAAGGTTTCG	GCAGCTGAACGTGATCAGACGA	exon
SNP13894753	scaffold10603	235500	C/T	TTACCATGACACACCACTATCT	CTGTCGATTTCCTGAGAGGGAT	intron
SNP13894851	scaffold10603	482837	G/T	TTGTCCGTGCCACACATCAGAT	CCGTACGGGTAACAGGCTCGAT	exon
SNP13894936	scaffold10603	569214	T/C	GTACGCGTCCATCTTCACACCC	CAATTGTTCTATCGTCAGCAGC	intron
SNP13894978	scaffold10603	628948	G/T	ATGTACGGAACACTCATAGGTT	TGGAACATACCCGTAAAGTCGT	intron
SNP13894994	scaffold10603	647065	C/T	GGACCCTAGCTTCTCTGTGTGA	ACTTGTACAGCCAGGCATATCG	exon
SNP13895131	scaffold10603	751396	T/C	GACCCTGTGGCGGTAAAACAAC	AATCACGCTTGAGCTCCTTCTT	exon
SNP13895253	scaffold10603	830959	C/T	ACTTCCACGCCACATTCTGAGC	ACGACGTTGATGGTGCTTGAGG	exon
SNP13895375	scaffold10603	922628	A/C	CGGAGTTACGACGATTCTGCTG	GGGACAGACGGATGTGGACCAT	intron
SNP13895532	scaffold10603	1152888	C/T	GAATTCAACACTTTGTCCTCCA	AACTACTTACCCTCCATCATGT	exon
SNP13895799	scaffold10603	1578293	C/T	AGTGTTACTAGATCTCCCCTCC	ATCCCAGATCATCAGGAAGGCT	exon
SNP13895848	scaffold10603	1586253	T/G	TGACAGTTCCTGGTTCAATAAC	AAGCCACATTTGCAAACACGTT	exon
SNP13895990	scaffold10603	1679157	A/T	GTCGATATTCGAGGTGAGATCT	TGGTGACACACACTTGGGTGGT	intron
SNP13896029	scaffold10603	1707841	C/A	CACAGAGGAAGGCAGACATGTC	AGCGTGTCGTTCTGTTTGTCAA	exon
SNP13896123	scaffold10603	1792768	T/C	CCATGGTACAGCTTGGTCTATG	TTAGACAAGGAATGACACGTGA	exon
SNP13896214	scaffold10603	1839276	G/T	TCGGGCCTTTATCTTTGACATA	CGGCCATTTGCATATGAGCGTC	intron
SNP13896302	scaffold10603	1951776	G/A	CAAGATCTGCACAAGTTGCCAA	GTTCCATGATGGCTTAACATGT	intron
SNP13896458	scaffold10603	2022650	C/T	AGGAGTTGTTCTCACCAGAGTT	CACCGCCTTCCTCATAGACCGT	exon
SNP13896502	scaffold10603	2125615	T/C	GGTGTGGATAGGGCGTGCTACA	ACGTAACGCCATCAACACTAAG	intron
SNP13896586	scaffold10603	2152611	T/C	ACAAGTTTACATGTGATCGCTG	AGTCTTGTCGTGATAACAGTAC	five_prime_UTR
SNP13896807	scaffold10603	2311750	G/A	GGTTGACGATATGGAACAACCG	GATTGGAGGAAAAGGTTACACA	five_prime_UTR
SNP13896898	scaffold10603	2346035	G/A	GGGGAAGTAACACACACAGAAC	CTTAGACCTGTGTCCCACTCCT	three_prime_UTR
SNP13896924	scaffold10603	2373916	T/C	CTGGACTAAGTGACAATGTGCC	GTGAACACACTTGCTGTAGGTT	intron
SNP13896929	scaffold10603	2413581	G/A	CTGGTGACAGCCCTAAGATGCG	ACAGTGGCTGGACAGAGATTGG	exon
SNP13897251	scaffold10613	382497	G/C	CAGCCTACAGTAAACATGCTGA	CTGAGAGTAAGGGTGTCAAGGC	exon
SNP1389731	scaffold8333	288733	C/A	CAATGGGATTAACCAGTACCAC	ACAAGGTAACATAGCCTGCAAG	exon
SNP13897324	scaffold10619	22380	G/A	CAAACACCTGGTTCATCAGGAA	GCTGTTCTATGCGCTGGTCCTG	exon
SNP13897388	scaffold10619	323906	G/T	CTGTACAACGATTGGTCAAACT	CCAATGGTCAGACCATCAGAAA	exon
SNP13897415	scaffold10619	372403	G/T	TCCACACCTCTGTACGCTTCGG	ATCACCTGGAGGAGGACAAGGA	exon
SNP13897468	scaffold10619	448167	G/A	ACTTCTACTCCTCACCCACTCT	GATTCTACAAGCATGCACTCTA	intron
SNP13897507	scaffold10621	30609	G/A	TATCCACCATGAAAGCCGTGTT	TAGCTGTGTTGGTAGTAGTGAT	exon
SNP13897514	scaffold10621	32776	C/G	CTCTTTATGACCCGCTGTTTGT	TTGGCGAAAGTCTGCTTTACCA	three_prime_UTR
SNP13897664	scaffold10621	218888	A/C	TTCAGCTGGAGGAGGAGGACCT	CCCAGTTGGAGAAGCTACGACA	intron
SNP13897685	scaffold10621	244799	G/T	GTGTGGTTTGGTGTCCTTGTCA	TACAATGTCGTGGTCCGAAATA	intron
SNP13897749	scaffold10621	297760	C/G	TTGGTCAATTGAACCTGCGTTT	GTGTCCATCCTTTCAGATTTCG	intron
SNP13897785	scaffold10621	320145	T/A	TGGAGCTGGACTGTACTAGTAT	GACCACAGCCGACAATGATAGC	intron
SNP13897827	scaffold10621	354160	C/T	TTGGAAGGAGTATGATGACGCT	AGTTGAACATGTCGTGGACAGT	exon
SNP13897841	scaffold10621	416871	A/G	TGCACTCCAGTAGGTGTGACAT	TGGGGTACAAATCTCCAATGTT	intron
SNP13898251	scaffold10621	1269472	G/A	TCTTTCCTCAGGATTTGGTGTT	TCACACTGGTAAAAGATGCCAC	exon
SNP13898340	scaffold10621	1347333	C/T	ACTGTTGTAGGGAACGGAACAA	TGTGTCGTGTCTGTTTGCAGTT	intron
SNP13898418	scaffold10621	1366678	A/G	AGATGAAGTAAGCGGCATGTCA	AAGTTCCCCTCAACAGGCAGAT	exon
SNP13898443	scaffold10621	1381320	C/T	TGTTTTCTCTATAGGTGCGATG	TGGACCATGGTGAGTTTGAAAC	exon
SNP13898506	scaffold10621	1433751	G/T	TCCATCTACGTGGCGGAAGCTG	ACTACTGTTGTTTGATGTGGCA	exon
SNP13898555	scaffold10621	1463650	C/T	ACTGTGGTGATAGTGAAATGCA	CACATATTGTTTTGTAGGCACC	intron
SNP13898581	scaffold10621	1487952	A/G	AAGGCACTCTGGTCATGACCAC	GTTTGTAAACACAGCTGTACTG	exon
SNP13898631	scaffold10621	1579484	G/T	ACTGTGGTTATCTGCCCCTTTT	AAGTCACAACTATCCAACAGCA	intron
SNP13898643	scaffold10621	1612538	T/C	AATAGACATCTACAGCTCCAGC	CTGTCTTCGTCAGCATTTCTGC	exon
SNP13898748	scaffold10621	1747988	G/C	CCTTCTAGGTTTCTGACAACTT	ATGACCTCCATTTCTCCCACAA	intron
SNP13898761	scaffold10621	1830321	C/T	GATAGGAACAGCAATACAGGGT	TCCCGAAGTACTGTTTGCAGGG	three_prime_UTR
SNP13898835	scaffold10629	37329	A/T	GTGGACAAGGTTTCCCTACAGA	ACACTTACCAGCCTCCACCACA	exon
SNP13898939	scaffold10629	223188	G/A	CTGGCTTCCCTTTGAGTTTGTG	TGTCAAAGTGTCTTGGTCCGCC	exon
SNP13898973	scaffold10629	283267	G/T	CGACAATGCAGCCCTAACGATA	AGCTAACAGTATTTTCACGGTC	three_prime_UTR
SNP13899078	scaffold1063	54847	G/A	AGTTCTGCGCTGTAAAGTTGCA	CTTTCACATCGGGGATATTTGG	exon
SNP13899194	scaffold10631	42635	G/A	ATTTCTACCTGGGTCATCACTT	AGTCAAGGCCAAAACTTCGAAG	three_prime_UTR
SNP13899258	scaffold10631	60390	C/T	GTGTGCTTGGGAAATCAACACA	ATACCTTCTGACTGTATCGGCC	exon
SNP13899491	scaffold10631	367791	C/A	GAAACCAAAAGCAAGCCCGACA	AGGTCATATTGAAGAGGAGCCA	intron
SNP13899510	scaffold10635	29902	T/A	GTAGGAACACACAGAAGCAGGA	TTATAGCGTTACAGTTTCCTCC	exon
SNP13899572	scaffold10635	161919	T/A	GTAAGACCAGTACCAGTGTTGT	CGTGATAAAGGTGTACCTTGAC	intron
SNP13899656	scaffold10635	181388	T/C	CTCCATCTCATTGAGTGACACT	TGGCCCAGTCACTCACTACAGG	exon
SNP13899724	scaffold10635	220089	C/T	TGAAAGGGATGTGGATGATTTC	GCGAACTTCACACCCAAGTCGT	intron
SNP13899773	scaffold10635	283532	C/T	TGTTGTGGCAGAATAAATCGGA	TCATCATGCTGGCCAACTGTAT	exon
SNP13899833	scaffold10635	358960	C/T	CACAGGGGATGACGTATCTGCA	ATACCATGGCTCACGGCAGATT	exon
SNP13899856	scaffold10635	394594	C/T	CTCTTCCTCCGCACGGTAAGTC	TCTGCCAGCACATTCCAGCTCT	exon
SNP13899910	scaffold10635	493888	C/A	TGTGGTTGCCATAGTGACCCAC	GTAAGGCACACTGGAGGAAGAT	three_prime_UTR
SNP13899932	scaffold10635	511745	G/A	GAGCTGGTGAAGGTAGGCCACA	AGCTTGGTCTTGTTACAGCAAT	exon
SNP13899959	scaffold10635	539673	A/T	TGTGATAGGATGGAGAGTTGTC	ACGGCTTCGACGATGATGATAG	exon
SNP13900010	scaffold10635	638449	G/A	ATGGTTTGTCCACAGATGTACC	CATACTCCAAGGCTTGGTTTGC	exon
SNP13900095	scaffold10635	761195	A/T	TCAAAGGTTACTGACCTGCTGG	TACACCGGCCGATTATCTGGAG	exon
SNP13900117	scaffold10635	782946	A/C	ACAGATGGAGAGTGAACTGGAG	CCACAAACAGAATACACAGCTT	exon
SNP13900118	scaffold10635	783767	A/C	TAGGCAGCGAGAACACCTGGAA	TGTAGCCTCACTCCGCAAGAAG	exon
SNP13900179	scaffold10635	874100	C/A	GTGGATGTTTCTGCAGGCTACA	CTGACAGACTACCAGCCTGTCC	exon
SNP13900211	scaffold10635	909745	A/G	TGGTCAGCGGGTATTGATTAAT	GGTTTGTTTGACCCGTACATAA	exon
SNP13900233	scaffold10635	929524	C/A	TTTGCAGTCGTGTCGATTTCAG	GAAAAGCAAGATGGGAGAAACC	exon
SNP13900292	scaffold10635	1263637	A/T	CAAAGTATGTACCACACAGTGA	GTATACGTAGCTTCAAACCAGG	three_prime_UTR
SNP13900311	scaffold10635	1309109	A/G	TGACAAGTGTTGTTTACGCTCA	CTCACTCAGCAACCCAATCCTC	intron
SNP13900539	scaffold10635	1602003	G/A	TCTTCTTCTACCTACTTGGGTT	TCAGGAAGCAAGACCAGAACGG	exon
SNP13900745	scaffold10635	1740393	G/T	TCTCAAGTGTCAGGTGGGTGCT	TGTTGCACAATGGAACATCACC	three_prime_UTR
SNP13900784	scaffold10635	1787035	T/G	ATTCTTCCCTATGCCAAACTCA	GGGCAAAAGGAAAATAAAGGGG	five_prime_UTR
SNP13900882	scaffold10637	45469	C/T	TCGATAATGAATGCCTCGCTGA	CCAACATCATGTCTGCGTCCAG	exon
SNP13901061	scaffold10639	105476	A/G	AACACTTGGGCCAGGAGATGAG	ACATCATCAGCTACATGAAACG	exon
SNP13901088	scaffold10639	127216	A/G	TGAAGGGTGAAATTTACCCTGG	AATAGATTTACCAGCGAAAGGC	three_prime_UTR
SNP13901097	scaffold10639	171204	C/T	GCCATTCCATGTCACCATTTGC	CACGTATAGGAGTAATGCCGTC	exon
SNP13901211	scaffold10639	260294	A/T	TGACCGTGACGACACTATCAAC	GGCCAGGTTTATGGACAAGTGG	intron
SNP13901526	scaffold10641	119991	T/G	TACAAGACACTCCGGCAGAATT	TGCCTCACAAACAATACCAATG	five_prime_UTR
SNP13901551	scaffold10641	187620	G/T	CTTGCTTGGATTCCGCCATGCT	ACCTCGCTCATCCAATGTACCT	intron
SNP13901599	scaffold10641	249814	G/A	GGAACACAGAGAAGCACTCTCC	CAATGTCCCAGATATGACAGCC	exon
SNP13901662	scaffold10641	310851	C/A	TGCAATAGGTCCATGCTGGATG	TTTACACCGGGCAAATCAGTTA	exon
SNP13901734	scaffold10641	375229	T/C	GTTGTCAGAATTCCACTGTCCA	CTGTGAAGCCCCAGATTTTATC	exon
SNP13901736	scaffold10641	375349	A/G	TACAGCAAGCCTCACAAGCACA	ACAAGGTGAGTCCTTTTCTAAC	exon
SNP13901742	scaffold10641	378312	T/C	ACAAAGAACCAATTACAGCCCT	CGAAAGGACGTCGTTCTAAAGC	exon
SNP13901744	scaffold10641	378387	G/A	GGGCTACAAAGGAGATACGCAA	AGAACGCGGCTTCATGGTAATC	exon
SNP13901754	scaffold10641	389031	C/A	CTGAACAACATGGCCGCCTTGT	GTTGTTGCGCTGACCGTTGTGA	exon
SNP13901757	scaffold10641	395482	G/A	ACTTCTACTCCCTTACCCGTCA	CAGAGCTGTGGATTGAGCTGTA	exon
SNP13901779	scaffold10641	555819	A/C	TACACGAGCTAACGTTACAGAG	AGTCACTGTCCGTCCCTCACAA	exon
SNP13901838	scaffold10641	841742	T/A	GACCCTCCACAGCCTTGTTGTC	CAAATCTTACCCAGGCCTAAAA	exon
SNP13901849	scaffold10641	853481	T/C	ACATCCGATCAAGACCAAGGAA	CTGTGGTCACAGGAAGCAAAGG	exon
SNP13901850	scaffold10641	855648	A/G	TGATCACCCAGAGAGAAGTTGT	CAAAGGTCAGAGAAGAGCTAAC	exon
SNP13901851	scaffold10641	857244	C/T	CGGTCATTCAGGCTGAGGGTGA	AAGGTGCTTCCCTATTAGCTAA	intron
SNP13901861	scaffold10641	858549	T/C	ATAGTTTGGTCCTTTCCACCAA	AAGTTCTTCCACAGCTGACCAG	intron
SNP13902161	scaffold10643	287668	G/A	GTCGCTGACCCTGTAACCTGTC	GATATGGAATCAGGAGCAGACT	three_prime_UTR
SNP13902198	scaffold10643	306113	A/G	CCACCACTCGGATGTTACTATT	GTGCTGACCCAAATCATATTGC	exon
SNP13902251	scaffold10643	410744	C/T	GGAGAGGCTGCACGTGATGTAA	GACTCGTCAGACGTAGAAGTGA	intron
SNP13902451	scaffold10647	361054	G/T	AGTCCATCAGTACTGTCACTGT	TTACACTTTTAGTGTCATGGCC	three_prime_UTR
SNP13902593	scaffold10647	573632	T/A	TGTGTTGTCCCTCACTGACCTG	TCTCTACATAGGTCTGCTGAGG	intron
SNP13902630	scaffold10649	71529	C/A	ACGCCACGGTATGGATTAAGCT	TAGTCCTTTGTACCCGGTGAGC	intron
SNP13902685	scaffold10649	228334	G/A	TGGAAGGGGTTACATGATGGAC	CATCTACAACCACAGAAACACA	five_prime_UTR
SNP13902766	scaffold10649	492262	A/T	ATACAATGGCTACCCGGTGCTT	AAGGTGGAGTGTTTGTCAGCGA	three_prime_UTR
SNP13902869	scaffold10651	54159	G/A	GACTTGGATTCCTCATGTTCCT	TTACCATGGGAACCCTGCTGAA	five_prime_UTR
SNP13902952	scaffold10651	98851	C/A	GTTTCCTACTTTGTGAGGGTGA	GCTTAGAATCTCCCATTGGTGC	exon
SNP13903027	scaffold10651	324957	A/G	GAGGACGAAGAGTGGTCGACTG	AAAGATAGTCATGCTGACGGAG	exon
SNP13903134	scaffold10651	569003	T/C	CGTAAAGGGTCTGATTAAGGCT	GCTCCGCGACAGCCATGTATAA	exon
SNP13903150	scaffold10651	615596	C/T	ACCTCACATCAGCTCTCACTCG	TTACCCTCAAGGCACCCCTTGT	exon
SNP13903398	scaffold10651	1299574	A/C	TGTGTCACTAGTGTCGTAACTG	GTGCCAAATTGATGGGACACAG	three_prime_UTR
SNP13903640	scaffold10651	1598917	T/A	GAAACCCCTTGTTGTGCATACA	GGCATCTCCCATCCACCGAATG	exon
SNP13903806	scaffold10651	1677807	C/T	ACTTCTTCGGCATCATCATCAG	GCTTCCTCCTCCTCAAAATCGG	exon
SNP13903810	scaffold10651	1679174	C/T	AGTCCTTCGTCCTTCAGCCAGG	AAGGGTTCGTACTCCTTCTGCA	exon
SNP13903813	scaffold10651	1680449	C/T	CCAAGCTGGTGAGTTCAGTGTC	TGGAGGAGGAGAATCTGAGAAG	exon
SNP13903822	scaffold10651	1683014	C/A	CGAATGAGTTCCTTAAGAGTGG	TCCAAGTAATCGTTGGCTTCCT	exon
SNP13904119	scaffold10651	2171973	A/C	TGTATCACTATGACGTCCCCAA	CTCCTAGTGACGTCATCCCCAT	intron
SNP13904126	scaffold10651	2173548	C/T	TCATAGTGCCATCTGGTGGATA	TCGTCAGAATCAGGTCAGATAA	intron
SNP13904161	scaffold10651	2178615	C/G	ACCTCTCGTTGGGTACTTCTTC	TCGATGCAGAGTTTCCACTATT	intron
SNP13904934	scaffold10661	54021	T/C	ACACGTTCACTTTCCGCTGTGA	TAGCAAAAGGAGCCCTGGAACT	exon
SNP13905179	scaffold10661	451159	T/C	CGGTATGGGTGATGGTCTACTT	TGTGGCAGGGAGTCAAGTGGAC	exon
SNP13905277	scaffold10667	65759	T/A	GCGTTTTGAGTTACAGCTGTTA	GAGGTCACGTCAACATTTCCCA	intron
SNP13905322	scaffold10667	96053	C/A	CTCTTCCATGTCCCTTAGCAAG	CTCAGTGTCACCCGTTCACTCT	intron
SNP13905399	scaffold10679	3747	T/G	TCTGGTACACACACAGGCATGA	CGGTTATGGCAGATGATAGTTT	three_prime_UTR
SNP13905453	scaffold10685	59813	T/G	GGAGGAATCTTACCGCGTACAG	TAGAGAGGAGAACGATACAGAG	exon
SNP13905478	scaffold10685	94825	G/A	CCGACCAGTCAGGTACGAGAAA	AAACGTCTTGTGACGCAATATG	five_prime_UTR
SNP13905581	scaffold10685	213348	A/T	CAGTAAAGTACGAAACTCGGGA	CAAGCTGGTTTAGATCGAAGGT	exon
SNP13905662	scaffold10685	269925	A/G	CAGATGCTGAAATTGGCAAACT	CACGGCTTACAGTAATACTTCC	intron
SNP13905791	scaffold10685	382827	T/A	CCTCTACTGGACTGTGATGGCG	TGTCATGTCATGGGACAAATGG	exon
SNP13905824	scaffold10685	430157	T/G	TCTCCTGTTGATGTGTGTACGA	GGTCCCACCACGGAATGTCTGA	three_prime_UTR
SNP13905832	scaffold10685	608753	A/G	TAAAGCTACGACGTACAGCTAT	ACTCAGGTGACAGACATGTCCA	three_prime_UTR
SNP13905854	scaffold10685	675152	T/A	GATCGTCGGGTACACCAAGACA	AGCAAAACTTCTGTCCGCATAT	intron
SNP13906156	scaffold10687	240925	G/A	AAGAATGTTATCAACGGTGTCC	GATTATCTCCCCTTGGTCTGTA	intron
SNP13906185	scaffold10687	258548	G/A	ACTGAGTAATTGCTTTGCTTCG	CTCTTGCAGAGCTTCCCAAAGA	intron
SNP13906234	scaffold10687	283959	C/T	CAAATCGGTGAGTAATGTCCTC	TGTCCCTGTGCTGTTTGTGGAG	exon
SNP13906393	scaffold10687	602461	C/T	TGGTCTGTTTTCAGGGGAGAAC	CAAGAAGCCTACCATCTTACAA	exon
SNP13906437	scaffold10687	614719	C/T	CATCCTGCTCCTGCTGGGTCAA	GGGCAAAGGTCAACAGATCAAT	exon
SNP13906453	scaffold10687	651935	C/T	AACTTGGCGGGAAAGCATGCAG	GATACAACGCGTTTTCTGGACT	exon
SNP13906590	scaffold10687	754302	C/T	GAGGCTGTTGTTGCTGGAACTG	GATTGAGAGGCTGATGCTGTTG	intron
SNP13906597	scaffold10687	755801	C/T	GAACCCAACTTACTTCACACAC	AGTGCCACCGAGTTTCCACATG	exon
SNP13906748	scaffold10693	132838	C/T	AGCCATATGTTAAACACCTACG	TGGGTTCCCGCTAACAACACAC	exon
SNP13906868	scaffold10693	377203	C/A	TCCAACTGCCAAAAGCAAACTC	CAGAAGTTTCCTGGAGCATAAA	exon
SNP13906946	scaffold10693	474155	G/A	TCTTTTGTGCTCCGTCAAGATT	ATCCCGCCACGTCATACCTACA	exon
SNP13907201	scaffold10703	146353	T/C	TAAGCGTCACACCGAAGATGAT	ATAGCACCCCATACACGCCAAA	intron
SNP13907239	scaffold10703	285656	C/T	CGTCGCCGAGGTATTTGATGTC	AGTTTTGGTGGATGCCGACCTG	exon
SNP13907366	scaffold10703	323895	A/G	CATAGGCAAAGTCGTAGTTGTC	CTGGTGGTATAGGTGGTGGTTC	intron
SNP13907492	scaffold10703	519960	T/C	AGTGTATCCAGGTGTGTAAATC	CGATACCTGTCCATTTGTGTAA	three_prime_UTR
SNP13907566	scaffold10703	567584	C/T	TGGACGCGGAGATGGACTGTTC	CACGAGAGTATGACCACGATGA	exon
SNP13907674	scaffold10705	26284	A/G	CGGGTCACCTGGAATCGTTATG	CGATGACGAAGAACCGATCTGC	intron
SNP13907727	scaffold10707	73108	C/T	CGGGGACATCGTACATCTTACA	GTGGAATACTGGTGTACGTGGG	exon
SNP13907742	scaffold10707	85660	C/T	CTGGAGTTGGGTTGGGGTTTGG	CATTTGGATTCGGAGTAGGTTG	exon
SNP13907745	scaffold10707	91361	T/C	TGTATTTGCCAGTCATTCCGTC	AGATACAATCGTAGTCACAGCC	exon
SNP13907748	scaffold10707	96898	T/A	ATCCCAAGACTGGCTCTGAGTG	CACACCATTGTACACACAGTAG	exon
SNP13907785	scaffold10707	206967	C/T	TGCAGATGTCTGTGGGGCGAAA	GGGAGCTAGGTATCAATTCAGC	intron
SNP13907824	scaffold10707	313295	G/C	CGTTCTCACCAGTAGGACAAAG	GGCTAGATGCAGCAGTCATATT	three_prime_UTR
SNP13907833	scaffold10707	320707	T/G	GCCGGAAAAGCTGATGACAATC	CGTGTGTTTTCCTTCCGGGTAT	intron
SNP13907934	scaffold10707	549717	A/G	AATGTTGGGTCAACAGTTAAGG	CCTGATATATCGGTAAGCGTCA	exon
SNP13908024	scaffold10711	82428	T/A	GACAGCAGCACTATCAGAGTAG	ACGTAGACCTGAATCATGAAGA	exon
SNP13908059	scaffold10711	201030	G/A	AGCTGCAGATGAGTTTCAACCG	TCGGCTACTTCGTAATACAGGT	exon
SNP13908073	scaffold10711	224870	C/T	TTGCCAAGAGTTTCTTCTCTGA	TATACAATTGGGGCCGAGTGGG	exon
SNP13908118	scaffold10711	268185	T/A	TGCGGGAGAGGTAGTAATTCTC	ACTCCATGCTGACAATAAGATG	exon
SNP13908257	scaffold10711	504534	A/G	GTTTGTTGCAGAACAGACATAG	ATCGTCCGCATTGGTGGTACTT	exon
SNP13908265	scaffold10711	574625	T/A	GAATACTACCTGGGTGGTCTTG	GGCCATGTTGCTTCGTGTTGTC	exon
SNP13908266	scaffold10711	588084	G/A	CAGAAAGTTCCCGAATGTCCTT	TACCTACCAGAAAAGCGCCAAT	intron
SNP13908299	scaffold10711	620679	T/A	ACTGTACCACCATGTCCGTGTT	TCATCTTACATGACTCGCATGT	exon
SNP13908614	scaffold10711	1045995	C/T	ACATCGGGACAAAGGTGTAACA	CCGATGTCCAACGCCAGATTTT	intron
SNP13908678	scaffold10713	244809	A/G	AAACTCTTGCTCGTTATCTTGG	ACGATGCTGAAATCTTCCAGAT	exon
SNP13908877	scaffold10713	335447	A/G	CTCCAACCCCACCTCCTGGTAT	GCCTCTCAAAACACTCCGAGTC	exon
SNP13909005	scaffold10713	420906	C/T	TACTTACCACAACGTCGCCAGG	CGTACATGTGCTTGTGAGATAT	exon
SNP13909136	scaffold10717	3827	A/T	AGCCGTTGATGCATACCTGAAG	CGAGGGACAAGTGGAAATTTAT	exon
SNP13909275	scaffold10717	102912	T/G	CCCTCACATTTCCGTTCTCTGT	TGTTCTGGTCAACTTCAGGCAA	intron
SNP13909298	scaffold10717	133476	G/T	GTGACCTGTTCGCAGGTATCAA	TCTTGTGTGAGCTTTCTTGTTG	intron
SNP13909711	scaffold10717	394244	A/C	TGCTTGGGTGTGATCAACCAGA	TTGGGCCGAATAGGTAGAACAT	exon
SNP13909760	scaffold10717	440179	A/T	ACGTTGCACCTGTATTCGTTCA	CCGTTTGCATTTCGGTAACCAT	exon
SNP13909786	scaffold10717	477975	G/A	GGAACACCTTTGGCCTTTTGTT	TGTTCGTCGTACAGAACGGAAC	exon
SNP13909831	scaffold10717	493515	T/G	TGCTGACCAATATCCTTATGTC	GCTCTTTCTGAAGAAGGCGTAT	exon
SNP13909925	scaffold10723	52176	G/C	CAGATCTTTCGCGCTTGAAGAG	TTTCCAGACCCATAAATGGGGC	intron
SNP13909934	scaffold10723	83673	G/C	GAGCGCTTGTCTAGAGTTTGGA	CTGGGTTTGAAGGTCGGTCTGG	intron
SNP13909956	scaffold10727	41011	C/T	TCGTCACCATGTAAACACACTT	GAAGAGTGCCTTTGTTCCTATA	intron
SNP13910054	scaffold10733	112243	C/T	GCATATGATCACTTGACCAAAC	ACATCCTGTAAGTGATAACGGT	exon
SNP13910156	scaffold10733	234707	A/G	TCCTGTCACGAGGAAGGACACG	TAGAGGTTCTGTTTGCCCCGAA	exon
SNP13910222	scaffold10733	280390	C/T	TAAGTACGTCGAGTAACGCCTT	CTGTCGTAGAGATACCACACCC	exon
SNP13910251	scaffold10733	386048	C/T	CAACATTCCGACGTCATGAGAA	TTATTATGGAAATGGAGCTGGG	exon
SNP13910435	scaffold10741	55625	C/T	AGTTTAATGAGCCATGCTAGCC	GGGAGTACACCAGCACATTTTG	exon
SNP13910472	scaffold10743	63214	A/G	AGGCATGGGCCATGGGCTATAC	AGAAAGTCACCACCGCCATCAT	exon
SNP13910539	scaffold10743	195349	T/C	CTGTGTGTGCTTGTACCGTATG	CGAGTAGTAGAGTCTGTTCTGG	exon
SNP13910577	scaffold10743	272294	C/T	TGTACATTGTGGAAGGGGAAGT	TCAGGTAGGTATTCAGAAGCAT	exon
SNP13910648	scaffold10743	299200	G/A	CGCGTGTTGTTAGATAATGTCG	TTGGAGTCGGTAAGTTTACTTC	intron
SNP13910703	scaffold10745	45325	C/T	GCACTGTTGAAAACCGGTCCTG	AGGTCTAGGGCTTTACCCACTC	exon
SNP13910737	scaffold10745	67363	G/A	GAGATCATATCGTTTGGAAACG	GATATTCCAGCTCCCGAGGACT	exon
SNP13910939	scaffold10745	239827	C/T	CCCCACCTCCAGATACGGATGA	ATGATATGATCTTCCCCTCTGT	exon
SNP13911009	scaffold10745	265373	T/C	CCGACAAATTCCAGGACTACAG	TTAACAACGACAGCAATCACGG	exon
SNP13911261	scaffold10745	400290	G/T	ATGCTTGTTGTCCATCATGTAG	CCATTGGGTTTGGTGACACGAA	three_prime_UTR
SNP13911329	scaffold10745	487568	T/C	TACTACTGGATACATCCATGGG	CCTGGAAAGACCAGCCAAAGGC	exon
SNP13911363	scaffold10745	679769	T/C	ATTTCTATGCTAAGTTGGTGCC	CTATTGGTGATGCCGATGCACT	exon
SNP13911425	scaffold10745	771217	A/G	GATAAACACGAAGCAGGAAATG	TCTGAATCTAATGCTCACAAGC	five_prime_UTR
SNP13911519	scaffold10747	100509	T/C	GACAGAACATCTAATGGCTGGT	TCTACAACACCCCTGTAAAACA	exon
SNP13911675	scaffold10751	357785	G/C	GTTCAAAGCAGAGGTGCTGATA	GCATGTAAACGTCAGCATTCAT	exon
SNP13911866	scaffold10751	686488	G/T	AGACAAGTACAGGTTGATCACT	TGGCGTACGGCTGTGAAGAATT	intron
SNP13911914	scaffold10751	719424	A/G	CCTTTTACTTCAAGATCGGAGC	GACACGGAGAAAGATGTTCACG	exon
SNP13911939	scaffold10751	729551	A/T	TCAGACGTGAACTGTATGGCCG	GGAAGAAGAGAAGGTGTGTATC	exon
SNP13911981	scaffold10751	754148	T/A	CACGCTCGATCATTTCAACTTC	AACCTGCTGGTAATCCTCGCCC	exon
SNP13912004	scaffold10751	797775	A/T	AGTCCCCAAAGAAAGAGAAAGT	AGAAACCTGCAGCTAAGAAGGT	intron
SNP13912021	scaffold10751	1002771	G/T	GCAGACGAGTACAATGTGACCG	ATGCCGGAAACAACGTACGACT	exon
SNP13912090	scaffold10751	1204057	A/C	CTTATTGGGACTTCGACCTAAC	GGCCTAATACTAGACGACCTAG	three_prime_UTR
SNP13912201	scaffold10755	378279	G/T	CATGTCTTGTGATTGCGTCATC	ACGGTTCCATATCTGTGATAGT	three_prime_UTR
SNP13912218	scaffold10755	451236	T/C	CGCGAACGCGCTATACCAAATA	ACGTGATAAGCATTCACCAATG	three_prime_UTR
SNP13912276	scaffold10755	486077	G/A	CATTCCAGACCAAGGAATCCTC	TCTGTTGTAGGAAGTGACCTTC	exon
SNP13912296	scaffold10755	500589	C/T	CAGGGAGAGAAGATGTTGAGTC	TGACTAGCTCTCCTGGCTGATC	exon
SNP13912300	scaffold10755	507626	G/C	AGCTGCGTCAGCTTCAAATGAT	TGACGTGGACATTAACAAACGG	exon
SNP13912421	scaffold10755	614463	G/T	CCCAGTTTGAGAGCAGCAACCT	CCATGTGGAGGATGTACCATGT	five_prime_UTR
SNP13912457	scaffold10755	628448	T/A	GGTAGGCCTGTTCTACCGTTCC	AGTCGTTCAGGATGGTAGTGAT	intron
SNP13912638	scaffold10757	136540	T/G	TGAACATAAAGACAAGGTGCTG	ACCGTTAGACATTGAATGGGTT	exon
SNP13912670	scaffold10759	45336	A/T	CCATTCTACAACACCACGAGTG	CTGCTAATGTGCTTTACCTTGT	intron
SNP13912714	scaffold10759	79334	G/A	ACAGGTGTTTAGGTGTGGAACC	ATGCCATACACACGTGGTTTAC	exon
SNP13912739	scaffold10759	101223	A/T	AGCATCCTCTTCGTATTGGTCC	GTAACTACGAAGACTCTCGGTG	intron
SNP13912813	scaffold10759	201501	C/T	TTTGGATGACAATGTGTCGGCT	TGACGTTAAGAATAGGGCCGGA	three_prime_UTR
SNP13912983	scaffold10759	366955	A/C	GCCTTTCATCAAGGTGGCCGTA	GATTCGATTCCCCGGTTGGACA	three_prime_UTR
SNP13913029	scaffold10759	408333	C/T	ATCAGACAACACAGGACCTACC	TCTGCCACTCGACCTATGATGA	intron
SNP13913067	scaffold10759	422524	A/C	TTGCTGCCAAATCGTTGTTGGG	TGTGAATGAACGTTTCACGTAG	exon
SNP13913122	scaffold10759	561443	G/A	ATCTTCTGAAGGACATGCTGTC	CTAACCCTATGGCAAGTAACAC	exon
SNP13913301	scaffold10759	745208	G/A	ACAAAGGGAGATACACCTTCCA	ACAGCGGTTATCGAGATAAAAG	intron
SNP13913613	scaffold10763	120537	C/T	GTTTAGGGGTACTGTCAGATGC	TTCGGTAATGGGTGTTACTAGA	exon
SNP13913688	scaffold10763	217804	C/T	TGATCGTGTCGGGTCAAAATCC	CTCACCTAAACATGGAAACACC	exon
SNP13913772	scaffold10765	123673	G/A	ACGGCCAGTCAGTGTACATTGT	TGTTCCACATGGACAAGATGTC	exon
SNP13913809	scaffold10765	140089	A/G	GTTGACTCACATCAAGACGCCT	TTTCAAGACAGATGTGAGGAGA	intron
SNP13913823	scaffold10765	154261	G/A	GATGCTGCTCTGTGTATGCAGA	GGCTTGTTGGTTGATCACCAAA	three_prime_UTR
SNP13913851	scaffold10765	186330	C/A	TAGCCTCCTGTTGCTGTTTCTG	GGCAGAGGAAATGTGGTCGCTC	exon
SNP13913937	scaffold10765	250638	G/T	GCTGACCTTTGTCATGCTCAAG	CCTTGGACTACAAAGGGGAAGC	exon
SNP13914275	scaffold10765	590062	C/T	TTGGCAGTTCTAACTTAGTTGC	ACTCGCCAATGCTTCGACGTAG	exon
SNP13914295	scaffold10765	604737	A/G	TGTCGTGTTACGACAAACCGCA	CCAGTGTTCTACAGTGTGAAAT	exon
SNP13914333	scaffold10765	730692	C/G	CAGGGATTTGTAGCATCGGATA	GGTACCCCATCCTCCAGTGTAA	exon
SNP13914366	scaffold10765	774094	T/C	CAACTCCAATCATGACCATCAT	TTGTAACCGCCATCGTTGTTAT	exon
SNP13914478	scaffold10765	886175	C/T	GACAGACTGCTATGTGACATGT	GTCCTGACTAATTTAGGGGCCA	exon
SNP13914550	scaffold10765	925930	G/T	ATTGAGAGGGTGAAAAGACCCT	AAGACTGAAATGGTGCTCCTGA	three_prime_UTR
SNP13914577	scaffold10765	936857	T/G	CCTTCAGAATACCTACTCTGGA	GAATCCATCTTCGACTCATTCG	exon
SNP13914865	scaffold10765	1151972	A/C	GTTTCCTGATCTTGACTTGCTG	CATCTGGCTTGGGTAAGTGTCC	exon
SNP13914897	scaffold10767	29305	T/G	CTTCACCCTCTTCATGGCCAAG	CGAACCGTGGACATGGTCAATA	intron
SNP13915093	scaffold10771	109995	C/T	GTCGTCTGTATTGTTGATGTGG	ACTCCACAATCTCTCGGCTACG	exon
SNP13915109	scaffold10771	135017	G/A	ACCAGCCCCATAGCCATAGCAA	ATGGTTAACACAAAGGCCGGTC	exon
SNP13915215	scaffold10771	258011	A/C	AGGTACACTGGCCGACGTTATC	CAGGAGAGCACGTGAGGTAGTC	exon
SNP13915262	scaffold10771	282186	T/G	TGTGGACAAGAGTGCCCTCAGA	CAAAGTCATAGATGTTTTCGGC	exon
SNP13915341	scaffold10771	431004	T/C	AGATGTAGACAGAGGGTTCTCT	TAAAGGTAAGCTGGTGTTGTCA	exon
SNP13915360	scaffold10771	443648	A/G	TTGCGAAATACCCAGCGTCTAC	AAATCCTTGGTGCAGAGAAAGC	exon
SNP13915405	scaffold10771	504724	C/G	CTAGATGTGGACGTGGACACCA	ACAACCACAACAGAGGAGCTCA	exon
SNP13915539	scaffold10771	747804	A/G	AATCGTCTAGCTGTCGTTCTGA	GGCTTAACAACTACTGCCCTAG	exon
SNP13915735	scaffold10771	1022749	G/A	CAATACAACTGTACCATGAGCC	TGTCCATCTGCATTGAATGCCC	intron
SNP13915800	scaffold10771	1118104	C/T	AGACGCTAGGCTTGCAGACCAT	GTTTCTCCAGTCCCATCTCAGC	exon
SNP13915846	scaffold10771	1151276	T/C	CTGCTGCTGTCTTTAATCCCTA	CACATGTAGGTGGCACAGCCAC	exon
SNP13915853	scaffold10771	1194746	A/G	GTGTTTTGAGTGTGGTAGCGTT	CGGCCTTACCAATGGGAGGTTT	exon
SNP13915871	scaffold10771	1201096	T/C	ATCTTCGCCGCTGTATGATGAA	GTATCACATCGTTATCGTGCTT	three_prime_UTR
SNP13915883	scaffold10771	1220650	G/A	ACAGATCGGTCAAATGAAGCCA	TCTAGCCGTAAATAGCCAGGCA	exon
SNP13915973	scaffold10771	1335222	T/C	CCTGGATTACGTCCTTTACGAA	TCTTCTCCTTTGTGTTTCCTGG	exon
SNP13916056	scaffold10771	1406987	G/A	ATCGTTCTGCGGTACTATGGGG	ACTTGCCGTTTTAGACACCGAT	exon
SNP13916099	scaffold10771	1602841	G/A	TAACGAGTCGTCTAGACAGGGA	GTGTGAGTACCGTGAAGTACAG	five_prime_UTR
SNP13916133	scaffold10771	1650096	G/T	AACATCTGCCTGGTGCCTTGGT	CAACGTTTGCTTGCATCATTTC	exon
SNP13916143	scaffold10771	1676355	T/A	AAGACCGTTTGTCATTGGCTGA	TGAGTAAAATGGCACTTGCTGG	intron
SNP13916238	scaffold10771	1816376	T/C	TGATGATGGGGAGGAAATCTCG	AAATAGCATGGATGATGGTGAG	five_prime_UTR
SNP13916448	scaffold10771	1962889	T/C	CCTCTGAGGTTTCAATATCTGC	CCCCGATGACATCACCTGTGGT	exon
SNP13916653	scaffold10771	2129258	A/T	CGTAAGAGAGGTGTCCAGCTGC	TTGTCACAGATGTTTGGGTCAG	exon
SNP13916844	scaffold10771	2440912	A/G	GTTGTACACATGTACCGACAGA	TGAATGATGCACCATCTACAAG	exon
SNP13917015	scaffold10773	140545	T/C	TGAATACTTCGGCAGGAATATC	CCCATACTCCACGCAGTACCAA	intron
SNP13917075	scaffold10775	66077	A/C	GTTGTCTAGGATACACGCACCA	CAGTGGCGCAAATAAGTGAACT	exon
SNP13917678	scaffold1079	94624	G/T	GTTAGCCTATCGTCAGTGTCCC	CGGTACCCTTTCTCCAGTTGAT	exon
SNP13917931	scaffold10797	326398	G/A	TATAGGTTCCGTAGAGAAGGGC	GTCTACAGTGACCATACAGACG	exon
SNP13917971	scaffold10797	402252	A/G	CCAACCCAACGTTAACTTCAGC	GCGTTGCTACTGGACATACACT	exon
SNP13918019	scaffold10797	474938	A/G	CATATTCACCACGCCAACCACG	CATTCCGACAACGACAACCACG	exon
SNP13918094	scaffold10797	594603	T/C	TCCAAAGACATCGTACCTGGTT	GATTTGGATGCAAGTACAAGTG	intron
SNP13918183	scaffold10797	665122	C/T	CGAGATACTTCGAGGGTAAATG	GGTTTACGTATTCAGCGTACTT	intron
SNP13918276	scaffold10797	752344	T/C	AGGTTCAGCACATTACTTACCT	ATGCGCTGAAGAGCGAGGCTAA	intron
SNP13918385	scaffold10797	850020	C/T	ATAAACGAGATTGCCAGCCTTT	AGGACACAGTACACCTCAGCCA	exon
SNP13918456	scaffold10797	2819622	G/A	GTGTCAATCTTACCATAGCTGT	GGATAGCCGCACCAAACAAGGA	exon
SNP13918475	scaffold10797	2855613	G/T	CCATGTCAGGAGTCACCACCTG	GATTCCCTGGTCAACTGAACGC	intron
SNP13919003	scaffold10797	3537801	C/A	CGCACACTGTTTCTACCCAAGA	CTTGTCATGATACGTCATCAGA	exon
SNP13919104	scaffold10797	3608808	C/T	TGGCTTGCCCCTTGTTTAGTTA	TTGCTCTTTGTTAGCCGGCAAA	intron
SNP13919177	scaffold10797	3675037	C/G	ATATTCGCGCTTACGTGGTACA	GGATTCCTTGAGCACAAATCCA	intron
SNP13919330	scaffold10797	3794821	T/C	GAGGCATATCCGAGTCGGACTG	GCTTTTCATACAGCGGGAACAA	intron
SNP13919366	scaffold10797	3815328	A/T	CCACCGCTGTCATGGTTACCAG	TATTTCCGCATTTGCGCATAGC	exon
SNP13919535	scaffold10797	3944740	C/T	GTGAGAGTGATTCTGAGTCTGA	ACAGCGGTGAAGAAGAGGAAAT	exon
SNP13919538	scaffold10797	3945186	A/T	GTCCTTCTGAACATGTGGAGTC	TCACCAAACAGCTGGAGTAAGT	exon
SNP13919564	scaffold10797	3951669	A/C	CCACAGCGTTAAACAACAGTTG	CGTAACCAAACTCAGCTATGTA	exon
SNP13919784	scaffold10797	4297646	G/T	TGCCCATTCGTCATCAAATTTG	CGACATAACGAAGAGTGTGTGG	intron
SNP13919839	scaffold10797	4314968	T/C	CAGACAATGTGCTCGCTTCTGA	TGGATTCTGAGATGGCTAGCTT	five_prime_UTR
SNP13919873	scaffold10797	4320673	A/T	CCATGTTGTCCTCCAGCTGCTT	AGGTAACCCCGATAATGACAGA	exon
SNP13919967	scaffold10797	4377244	G/A	TTCCCGCCATAGCTATCTCATC	TTGTATCAAACTCCGCAATCAG	exon
SNP13919999	scaffold10797	4410705	G/T	CAGTAGTGCATCAAGCCCTTAC	TAGGATTGAAGCTTGTCTGTGA	intron
SNP13920053	scaffold10797	4424155	A/C	ACGAGAGAGTTGATTGATCACT	ACGCTGTGAATAATTCGTCAAC	three_prime_UTR
SNP13920064	scaffold10797	4470241	G/T	TGTTCCTGGTTTAGTGGTGGCT	TACAGAGCTTCCTGTTGTGTAT	exon
SNP13920409	scaffold10799	74793	G/T	GAGGTATTTTCCTTCCGTCGAT	GTACTTGAACTGTTGTGCCGCA	intron
SNP13920557	scaffold10799	198877	A/G	CGTCCCTGATACGCATCAGTTC	CTAACGTCCTGTCTGCCAAGAA	exon
SNP13920661	scaffold10799	260444	T/C	CCGTCAGCATTTTCTTCTTCTC	CGTGCTGCTTAGACTCGACGTC	intron
SNP13920704	scaffold10799	293033	G/A	GTTCAGGTGGCAAAAGTGCAGT	CTGCTTTAGTGGTTGGGCTCGG	exon
SNP13920844	scaffold10803	67642	T/G	GTCTGACGTCACTGGTAAGTAG	GCTGATACTCTCCCGAGGAGTT	intron
SNP13920876	scaffold10803	95833	G/A	CACGTAACCAATCACAATGGCT	GATCTGCAGCGTGGTGTCCATT	exon
SNP13920937	scaffold10803	204540	T/A	CTGGCGGACATTCAGCGTTTGT	AAGGTCGGCTGATTTCTGATTG	three_prime_UTR
SNP13921194	scaffold10807	120659	G/T	ACTGTCTGCATCTGTTTGATCA	TTGCTGTCCAAATCCGTACACC	exon
SNP13921306	scaffold10807	309202	C/T	AATACGCCTGTAAAGTGTGGGA	ATGGGGTCTGATCATTGGTCTA	intron
SNP13921374	scaffold10809	31364	C/T	ACCCATCGAGGAAAATCCAAAT	CAGCTGCATACTAAGGGATTGC	intron
SNP13921448	scaffold10809	317359	T/G	GCATCAAGGACTTCCTCTCATC	AGGATGAAGAAGAGGAAGAGGA	exon
SNP13921465	scaffold10809	415637	T/C	AGACATGTAACCGCACCTGTAC	GCACTATCCGCCGTAACGAGTG	exon
SNP13921505	scaffold10809	491661	G/A	CCTTTCCTAGCCATCGACCACA	ACCTGGTAAACACCAAAACAAC	exon
SNP13921549	scaffold10811	254	A/G	TTACAGATTCTGGTGCAGGTTT	CGCCGGAACCTTTCTTATGCAA	intron
SNP13921637	scaffold10811	116948	G/A	TGCAACTTCCGGTTCTACAACA	CACAATACCGCACACATCGACA	exon
SNP13921819	scaffold10811	213824	G/A	TCTGGGCGCTCTGTACAATCGT	GCGAGGCGGCATACTTCTTATC	exon
SNP13921887	scaffold10811	261501	C/G	CAATATCGAAATCCACACGAAC	TGATGCACAGCTAACTGTTACT	exon
SNP13921931	scaffold10811	319568	C/T	AGGGGACAGCAAGTAAAGAAGG	CTGCCATGCCAACATTCAAATT	exon
SNP13922005	scaffold10811	360250	G/A	TGCCCATGTTTTCCTCATTTTG	TGTCTGAATGGTCGCTTGTCAA	exon
SNP13922132	scaffold10811	610091	G/A	CGTAAGGATTCCACAAGCAGAC	GATTGACACCAGCTGTGGCTAA	exon
SNP13922244	scaffold10813	142079	A/C	AAAGGCAGCAGATGAAAATCAG	CAAGAAGGGGAAGAAACGAAAA	exon
SNP13922267	scaffold10813	192682	T/A	AAGGTGCGATGTTCCAAATGTA	ATTATTCGACGCCGTCTTCTGA	three_prime_UTR
SNP13922326	scaffold10813	388697	C/T	CAGGTGCTACCAGTGTGATGGT	TTACCTCTCCACTGGCGCAAGG	exon
SNP13922335	scaffold10813	400213	T/C	CCGCGATATGGGCGATGTTGAC	TCATGTACACGGAGGCCAAGGT	exon
SNP13922401	scaffold10815	108040	G/T	TTCCCACAAGTTCCTGTCCTGT	GGACAACAGGGATTATCCAGCT	exon
SNP13922467	scaffold10815	148123	C/T	CAGACACACACCGTACACTAAG	CTTCAGACACACTCCCTACACC	intron
SNP13922696	scaffold10819	199289	C/T	TTGACCATATGGGCAACCCCGA	ACTATGCTTCCATACTGCCGTG	exon
SNP13922705	scaffold10819	213011	A/T	TCATAGCCCATCGTTGGCTGTT	GTAATTGGCTCCTCCGGATACT	exon
SNP13922816	scaffold10819	360678	G/A	GCATGTCACAAGAATGAAGCTA	CTTCAGCAATTGTTACATGAGC	three_prime_UTR
SNP13923078	scaffold10821	362867	G/C	AAAGAACGCGTTGTATGAAGTC	TGGAGTCCATTAGGACACCGTC	three_prime_UTR
SNP13923087	scaffold10821	517982	T/C	TATCACAGAACTCCGAATCACA	TATCTTTGTTCAGACCGACGGA	exon
SNP13923153	scaffold10821	619250	T/C	GTGTTGAGAAGGCTATTCCCTT	AGATTTGTCGAAGCACCTAGTG	exon
SNP13923194	scaffold10821	720897	G/T	GCAGGCTAGTTCCAGCTCCTTT	ATCCTGCTAATATTGCACCGCC	intron
SNP13923280	scaffold10821	904251	A/T	TGTTCCTGTGTTGACATAGGTA	GATAAAGTGGTGTTAAGCACAC	three_prime_UTR
SNP13923343	scaffold10821	1102551	G/A	AGCTCCAAAGAACTCGGACAAC	CCACAAACTCCAAAGGTCCCTC	exon
SNP13923354	scaffold10821	1165578	G/T	CTTAAACGCGTCATCATTGTAG	TTTCAAAATGCTTGTAGGCCAC	exon
SNP13923701	scaffold10821	1716191	T/C	CATTCTTGAATATGCTCACCCA	GTTCTGCAGAGGTGCCTTTTAC	intron
SNP13923751	scaffold10821	1751316	C/T	CGAATTTGATCGAAGGTCGTTT	CTGTGAAAACGTTGAGCGTATT	intron
SNP13923800	scaffold10821	1770123	T/C	ATGAACTTACAACGGAGAACTG	CAATGCACTGACTGTATTTTCC	exon
SNP13923970	scaffold10823	232682	C/T	GCGACTGACAGCACAGATGTGA	TCCACGGTTAGTTGTATTTCGT	intron
SNP13924088	scaffold10829	55345	T/A	GTGTTGTAAACGTTTACTGACG	TTCAAGATGTACACATGGAGGA	exon
SNP13924117	scaffold10829	89046	A/C	GTCAGCTGAACGCTACTGTGGA	GGGACGAACGTCGTGACACCTA	intron
SNP13924342	scaffold10829	431096	G/T	GTTATTTTGTGCCACTGGTGCT	TGGCTGTGTAGGTACTGGAGCA	exon
SNP13924385	scaffold10829	469039	C/T	ACTTGGAAACCTTCTGTTGTCC	CATAGCGAGCACTTTGACACCT	exon
SNP13924587	scaffold10829	819895	C/T	ATGACTGTATAGGGTGTCGCCA	CGAACACTGACCGTGATCACTG	exon
SNP13924655	scaffold10829	844072	C/T	TGAGTAGCAACTGGACACTGAT	ATGTCGGCCATCAATCCTTCGT	exon
SNP13924877	scaffold10829	1328151	G/A	CTTACCTGAACGTGTTTTGGTT	GTGTGACAGCAGGGAAGTACAG	exon
SNP13924975	scaffold10829	1439978	C/T	TGGAGGAGTACTTCGACCAGAA	TTAGCCAACTGGGTATCATAAC	exon
SNP13925070	scaffold10829	1598552	C/T	CGGAGGCCATCGCTGATATATT	CAGAGGTCACTCACATAGAGGA	exon
SNP13925095	scaffold10829	1604308	C/T	CACAGGAAGTCACGAGTGTTAC	AGTTGATCACAACTGCTGCCAC	three_prime_UTR
SNP13925167	scaffold10829	1693589	G/A	GCCGTCTGGTATCCATCAAGGA	ACTCATCGGAATGGTCAGATTC	exon
SNP13925239	scaffold10829	1790342	A/T	ACAAGGCGGAAATCAATTGAGT	AGGGCAACAAAATGGATTTGGC	intron
SNP13925251	scaffold10829	1804926	T/C	AAGTGTCCTGCCATCAGTCATT	TTTCATACCCTTGTTCAGCCAC	exon
SNP13925252	scaffold10829	1809968	A/G	TTCTTCCAGGCGATGTCCTGTT	CAATCATCCAGTCAGCAGGAAA	exon
SNP13925253	scaffold10829	1811350	T/C	CAAATGGCCGATTTGTCCACAT	CACCATATCCAGACAGCTTCTG	exon
SNP13925311	scaffold10831	24706	G/C	ATCAGAACTTGTCCAAACTTGG	AGCTGATGTCCCTAGAGAAGAG	intron
SNP13925392	scaffold10831	127383	G/A	ACGCCGGTAGTTCGAGTTCAAA	AGATTTACAAATGGCCGACTCG	exon
SNP13925436	scaffold10831	147783	A/G	TCACTTGCTCAAGAGCATGCTT	TTTCCGTGAAACGGTTCATACA	three_prime_UTR
SNP13925458	scaffold10831	167491	T/A	ATTGGGTGGAGATACAGAGGGA	GCATCGCATTATCGCTAGCAAA	five_prime_UTR
SNP13925468	scaffold10831	182161	A/G	AGATCTGGGTTCTGCAGCGAAT	TAGACCAATGGTTCAAACCACA	exon
SNP13925490	scaffold10831	199292	C/G	AAAGACTGAAGCAGGTCCTTTC	ACAGAGAAACACCACCAAGCTT	three_prime_UTR
SNP13925623	scaffold10831	408646	G/C	ATGCACGCGGTAGTCGACTTTA	GATGCATCAGGACCATAGAAAA	three_prime_UTR
SNP13925744	scaffold10831	522656	G/A	TGTTCATCTGGGGTTTGTACGT	GATCATTCATTCCAGGCTCGTT	exon
SNP13925800	scaffold10831	541818	G/A	GAAGTGGAAATGGACATCTGTC	CCTCATCAGCCTATCAGTATCC	exon
SNP13925827	scaffold10831	589917	G/A	ACCTTGATCATGTAGGACAGGA	CAAATCCACACGTAGCTAGAGT	exon
SNP13925856	scaffold10831	597406	C/T	TTTTAGGTGGCTACCAAAGAGG	GTGGAGGTTACAACAGGTATGA	exon
SNP13925915	scaffold10831	613003	A/G	CATTACCCTTTAGGTCCCACTT	CGACATGCTGGCGGAACTCTTT	exon
SNP13925918	scaffold10831	616048	C/T	CCATGGTAGAGAGCTGTTGGGT	TTGGTTTGTCCACAACCCCATT	exon
SNP13925932	scaffold10831	628763	G/A	TGTGACGTGGTATTCTGGGGTC	CGATTGCCAGATGCCAACAACA	exon
SNP13925941	scaffold10831	630593	C/T	ACGAGTTACTGGTCAGCTGGGT	GGGTCCAGGGTTGGTTGAATAC	exon
SNP13926066	scaffold10831	713665	A/G	ACTACACACTAGTCACAGACTC	ATACCTATCAACCACCAAGGAA	three_prime_UTR
SNP13926157	scaffold10831	740779	A/G	TTGTCTTAGGGAACAGGTTGTT	TGAAGTAGTCCTGGGCGTTCTT	exon
SNP13926262	scaffold10831	781016	C/T	AACCTAGGCCCTTTTGTGTTTT	CAACCAGTTAAACCCGAAAGAA	three_prime_UTR
SNP13926275	scaffold10831	785327	A/C	CAATTTTCATGATGCTGCAGAC	CGGATGCCAGGTGAATAGCACT	exon
SNP13926277	scaffold10831	786251	G/A	GGGCCTCAGCAAAAGCCCTAAA	ACTGTTCCACACCAGTCAGGGA	exon
SNP13926312	scaffold10831	980479	T/C	CAGTGTACCTGTACTGCTGGTG	TGACAGGTGAGAACCACCTGTA	intron
SNP13926576	scaffold10837	72090	T/G	CCTTTACTGCAGCAAGCCACCC	ATGTAGATATGGCCTGGAATGA	exon
SNP13926699	scaffold10837	331903	T/G	TGATTGTGGTTCCTTTCCTACC	CAAACCTTCTGTTCCGTGTGGG	exon
SNP13926900	scaffold10839	6904	G/T	TCGGGTTAAGCCGGCTAGTATC	CCTGTAAAAGAGGGACAACGCA	intron
SNP13926910	scaffold10839	111497	G/A	CTGGTGGAAAGGTAATAGCATG	GGCTGAACTTACGGATTACGTC	exon
SNP13926945	scaffold10839	193354	C/A	ACAAGTTGTGGAAATGGAAGGA	AAACACTTCCTTCCAAGAAGAC	intron
SNP13926973	scaffold10839	356919	T/G	AACCGAGAGGCTGAGTCACGTA	CGATTGGTGGTAATGATCAAGA	exon
SNP13927165	scaffold10839	480657	C/A	CCTGAACCTGAAGCTAAGGCCA	AGATGGGTGTCACTCTTTGGTT	exon
SNP13927282	scaffold10839	788567	C/A	CCGATAGTGCTACTCCAGCCAC	AAAGTTCTCCAGAACTTGAAGG	exon
SNP13927453	scaffold10841	188245	C/T	GCTCCCTACACTATTTTGCTGC	GAATCTGTGGTAATCCGAACTC	intron
SNP13927483	scaffold10841	206179	A/G	TCAAGGCGGTAGTTCAGTGCCA	GCCTCCTTCCGGTTATTCCTAG	exon
SNP13927516	scaffold10841	232727	C/A	ATACAGTGTTCAGGAAGCATGC	AGGATAAGTCCGAACCAATCAG	exon
SNP13927745	scaffold10841	312567	A/C	ATTGACACAAAGGACATGGCAA	ATGGGAGAAATGGGAGTGGAGG	exon
SNP13927758	scaffold10841	368408	A/G	AAAAGTTGAGGTTGGTATTCCG	CGACGATGAGGTTTCATCCATA	five_prime_UTR
SNP13927857	scaffold10841	416948	C/T	ATGTCCGGGTTCTATTCTCAAA	TTGCTCGGGGCAAAGTCAAGTC	exon
SNP13927926	scaffold10843	11120	G/T	GATAGTCTTCATAAGCCGAGTC	CTGGTGTCCACACCAAAATATT	intron
SNP13928092	scaffold10847	150874	T/G	GTGGTCTTGGTTAAGTGTAGAA	TGGAATCACCGACCAAACACAC	three_prime_UTR
SNP13928134	scaffold10847	178370	T/C	CTTCCACAACTTCCTCCTCTTC	CAGTTGGGTCGGAATTCTCTTT	exon
SNP13928312	scaffold10847	368437	G/C	AAGAGAATGACCGAAAATCGCT	CTCAGGATAATGCAGTCCTCTC	exon
SNP13928662	scaffold10847	578934	A/G	CAGACATAGCCAGATGTTCGGT	ACTTAACACTTTCAGACGTCAC	intron
SNP13928754	scaffold10847	602870	C/T	TGCTGGTGGTCATGGAATCAGT	CGTCGCTCTCCTCCGACGTATT	exon
SNP13928830	scaffold10847	727518	C/T	AACCTCCACTAATCAACCTGTT	TTGCCCCAGTCCTGTCACTCAT	exon
SNP13928872	scaffold10847	767366	T/C	AGTTTGCCTTACCCGTTTCTAC	TCAAACTGCCGACAACACAGAA	exon
SNP13928898	scaffold10847	826857	C/T	AAGGACAATGCATGAAGTTGAC	AAACTGCTAACCAACGAATGTC	intron
SNP13928923	scaffold10847	858997	T/C	AACAGGAGCTAGATGTGTCCCT	TGGTGGTTGAGTTCCATACCAT	exon
SNP13929075	scaffold10847	1105569	G/T	TGACCTCTATCTGTACGAGGTC	AGCCAGGAAAGGTCACAGAATC	exon
SNP13929166	scaffold10847	1226365	G/A	GAGCTTCTGGAGGAATTGCCTC	CAGATGTGCGTCTGTTGGATGT	exon
SNP13929180	scaffold10847	1240891	G/C	TGACTACATCCACTGGGATGGT	CCAGCACACAGCAGCTGATCAT	exon
SNP13929195	scaffold10847	1254043	C/T	CTACCCTGCGTTATAATGGTGT	AACTTCGACCAAACATGGAAGA	exon
SNP13929212	scaffold10847	1260310	T/A	GCTCCTGGATATAGCATGGGGT	TCCCGACAACCGACCAACCTTC	exon
SNP13929277	scaffold10847	1288875	A/G	TCTGTAGTAGGTGTTTGTACCA	CTGCCACCTGTCAACATGTCAA	exon
SNP13929292	scaffold10847	1308786	C/G	ACCATCAGAAGCACCATCAGAA	TGCATCCCTGCCCAGTAATGGT	exon
SNP13929367	scaffold10847	1335207	C/T	GAAGCAAAGCAGTTGTTTTCTG	TCTTGTCTATCTTGCAAGCATC	exon
SNP13929406	scaffold10847	1360469	A/T	CCCTTTAGGTTTCACGGACGAA	CTCGGTTTTCTTCACAGAAGTA	exon
SNP13929410	scaffold10847	1383556	T/C	TTCTGGCATGCTGGACATATGG	ATGTACCGAGCGGTTTATTCGT	exon
SNP13929485	scaffold10847	1564646	C/T	CAAAATGGCTGACAAGGCTTGG	GAAAACTCGTCGTCGTTAGAGC	exon
SNP13929537	scaffold10847	1712020	A/G	CCGTCAGAGGAAGCTGTCTATT	GAGAATGTCCGTCTATAGGCTC	intron
SNP13929567	scaffold10847	1829841	A/G	AACATAGGTTGCTGACCAGTTT	CAAGTAAGATGTTCGCCTAGCG	three_prime_UTR
SNP13929622	scaffold10847	1853539	G/A	TGACAGGGTCGGGACAGGATAC	TAGAACTTGAACACTCGGACAT	exon
SNP13929713	scaffold10849	120039	G/A	TGTACCTCGACAGGTCATCCAT	TTTGGTCCTCATCATCGCTAGA	intron
SNP13929961	scaffold10849	431543	A/G	ATGGACATTAGAGGCAGATGAC	AAAGTGACGAGGTCTGCCCTTT	three_prime_UTR
SNP13930022	scaffold10849	463791	A/G	GTACCTCAGGTTCTGGTGTTGG	GGGTGGCTATGTACGAGGCAAA	exon
SNP13930046	scaffold10851	19216	T/C	CCAGTATGTGATTGCATCGGTA	GATGCAGAAGGTGGTCTGAAAA	intron
SNP13930144	scaffold10855	6248	C/T	TTGGTCCTGGCACCAACTTCTG	TCTTACTGTGGGCAGCAAAATG	exon
SNP13930546	scaffold10857	245209	A/G	TCAAAACATCCGAACACACCTC	TATCGCCATATATTGAAGAGGC	three_prime_UTR
SNP13931065	scaffold10863	347566	C/T	ATTCTGCAAGTAGGATTGTTCC	GACAATCCTTTCCCCTGAAACA	five_prime_UTR
SNP13931076	scaffold10863	363334	C/T	AGTTTGTCAGGTAATGGGTGTA	TCAGTAGCTCATGGTCCATTGA	intron
SNP13931480	scaffold10867	594572	G/A	CAGGTCCTTACCAAAACACCTG	AACTCGCTGCATAGGACATATG	exon
SNP13932247	scaffold10867	1561456	C/T	GGCCAGAGTTACTAGCCAACAC	CAATAATCAGTAGGGCATCAGC	exon
SNP13932253	scaffold10867	1567186	C/T	AGACTTACGTCGTGTCCATGTC	TGTGTTGCATCTCCATAATCTC	exon
SNP13932470	scaffold10867	1948789	G/T	AGCCGAAGAAGGACCCAAAGTC	AGGCTGGCTTGTATGAAATGTT	exon
SNP13932654	scaffold10867	2063382	A/T	GTGTCCAGGGTTGAGGTGAGAT	TATATACATCAGGTTGCTGTCG	intron
SNP13932730	scaffold10867	2099117	C/T	TTGCCTCTATTTTCTTGACCTG	GAGTCATTGAAGTTGCTGTCTG	exon
SNP13932915	scaffold10867	2325981	C/T	TAGGTCGAGGCTTTGGCTTTGG	CAGATGGAGCAGGTTTGAATAA	exon
SNP13932958	scaffold10867	2367776	G/A	CCGCCAGTGATTGTAGTCAATC	TTGCAAGTTCTTATGGACCAGG	intron
SNP13933299	scaffold10867	2686531	G/T	CTTCTTCCAATGACAGCTGATT	TAAGTCCCTTGAGAGAATCCTC	intron
SNP13933441	scaffold10869	233843	G/A	AGTTTATCCACATGGATGAGTC	GGGAGAAATTACACGAACTGGA	exon
SNP13933648	scaffold10871	38853	G/T	TAGGCTCCATGTTATACACCAG	CCACCGGCTGTCAATCAAAATA	intron
SNP13933827	scaffold10871	258300	C/A	TACGGACTGGAGTGGCCTGTTG	CCAAGTCATTCACACGGGGAAG	intron
SNP13933894	scaffold10871	304807	C/T	GGTTGCTATGGTGATGTACAGT	TGGAATGGTCTATACAGGTGCG	intron
SNP13934091	scaffold10875	104889	T/C	CTGTCAAACAAAAGGCTGCCAT	TTCCAGTGGCAAGATCAGGCAA	exon
SNP13934186	scaffold10875	156397	T/C	TCAATCTCACCTTATGCTTGTC	TCTGCTGCATCCCAGGACAAAC	exon
SNP13934487	scaffold10877	222614	A/T	CGTCATCTGATTGTAGGGCAAG	ATGTCATCTGATTGTAGGGCAT	intron
SNP13934560	scaffold10877	257940	T/C	TTGGAAGGCAGTCTGGAAATGC	ATTTCGCCTACACTGAGGCTAA	exon
SNP13934609	scaffold10877	265674	C/A	AAATACAGCTGTGTCATCCTCC	TCCCAGAAGGAGTGGCTACATA	three_prime_UTR
SNP13934671	scaffold10877	300726	G/T	AAGGTCGTCAATGTCGTAGATT	ACAGAACGATCTGTCATGCAAA	intron
SNP13934764	scaffold10877	358675	A/G	TTGGAGTCTTTCCTTTAGTGTC	CTCCACACTGGAAGGAATCCAG	exon
SNP13934778	scaffold10877	378286	G/C	CGGCTATGCAGGAGGTGGAATT	AGACATTCAAACACACGAACCT	exon
SNP13935059	scaffold10879	301270	C/A	CAGGCCTTGGGTTTCGTCGTTT	GCTTCTTCCGTTGTTTCTCTGG	exon
SNP13935124	scaffold10879	344132	C/A	GTTGGAAGTTGGTCACTCCTTC	TGGTCCTGAGTGGAGATGTCAC	intron
SNP13935166	scaffold10879	416044	G/C	GAATTGTCCAAACCCCTGGTCA	TCAGAAGCCTGCTAATTCTCTG	five_prime_UTR
SNP13935204	scaffold10879	437254	A/G	ATTCGCAGTATTGTCGACAGGA	CTGAATTCGACAACGGAAATAG	exon
SNP13935441	scaffold10879	643651	A/G	AAGGCCAGGAGGTGTGTGTACT	CAATGAAGATGCAGAACAGTCT	exon
SNP13935503	scaffold10881	50426	T/G	CTTCACAGAACGGACAACATAC	GCACTATTTTAGGTTCCGTACA	exon
SNP13935590	scaffold10883	279635	T/C	TGTATTCCAGGGGTAGTACAAC	CATCCATGAACCCAGCCCGAAG	exon
SNP13935612	scaffold10883	310152	T/G	TAGGTGTGGTCTAGCTGGGCAG	GATGAAGTAGGACTGTTGTCTG	exon
SNP13935618	scaffold10883	344772	T/C	GGAACTGTATTGGGTCCCGCTT	TGCTGGAAACCAAGATCGCTGT	exon
SNP13935636	scaffold10883	350133	C/T	AACTCATGTACATGTTGCTGTG	CATACTGATGGCGGTCACTGGA	three_prime_UTR
SNP13935734	scaffold10883	430170	C/T	AAACACACAAGGCATCTGGTGA	TCCATATCGAGAAACACAACTG	exon
SNP13935765	scaffold10883	475397	C/T	CGCCTCAGCTACTTCTAAATCG	GGACAAATCATCTGTCCTCTCA	intron
SNP13935782	scaffold10885	3498	T/C	ATGGCCAGCTGTGCTACGAAGA	GTACTACAGTTGCAGAGGTAGC	intron
SNP13935826	scaffold10885	66428	A/C	CGAACAGTACCGAAACTCCAAT	CGTCGATGGTCATTTTCTCGAC	exon
SNP13935920	scaffold10885	206753	T/C	CTGACGCTGATATCGTCAGTGG	GGAACTGCTACAGGACCATGGA	exon
SNP13935951	scaffold10885	243621	G/A	CCGTCTACTTTGAGTGACCTTT	ATTCGTAGTGGTTGTCTTGTAG	three_prime_UTR
SNP13935966	scaffold10885	253292	G/A	ATGTGCCCTCAATTTTGCTATG	TTCCTGGGGTTCAGAGAGCAAC	intron
SNP13936005	scaffold10885	268629	T/G	CTTTGACGAGGCTTGGGAAATC	CGTCGTCAAATTTGGGTGCGGA	intron
SNP13936015	scaffold10885	270635	C/T	CTTCAACTTGCTTCTTGTAAGC	CCTTCTTCCACTGGGAGTTGTC	exon
SNP13936080	scaffold10885	314265	T/C	CCTACCAGGAGTTTGACATCCC	AGTTTCCCTTCCACTTAAGGAA	exon
SNP13936095	scaffold10885	339047	C/T	GAAAGAGGAAATGGCTGTGTCA	GGTCATAGGTCAAGTTCAAACA	three_prime_UTR
SNP13936123	scaffold10885	372727	G/T	GTATAATCCGGTGTATGCGACG	AAGAAACACTCAGACAGATGTG	exon
SNP13936179	scaffold10885	396618	G/A	TGTTGTTGTTGTTCAGCATACC	CAATATTGGGAAGAACACAGGC	exon
SNP13936283	scaffold10885	579355	G/A	GCCACAATGGCGACATAACAAC	CTCAGGTGACCTCCCCTAGATC	intron
SNP13936376	scaffold10885	613763	A/T	TGTCTAATCCTCCAATACCTCC	GTCAACTGCTCCTTGTAGCTTC	intron
SNP13936381	scaffold10885	621994	C/G	ATGTGTGGTATTCAATCAACGG	GACTTGGGACCTTTAAGGGTCA	exon
SNP13936386	scaffold10885	628417	T/A	GACAAGAGGCTATGGAAGTCAC	CTTCATCCAGGGTTGGCAAGTT	exon
SNP13936414	scaffold10885	637936	C/T	CTTCTCCAGTTTAAGCTCCAGA	CTTCATGTCTGTAACGTTGCCT	exon
SNP13936495	scaffold10885	707884	C/T	GTAAAGCTGACAGTGGACAGTT	TGGGACAGACAGACGAATTTGA	exon
SNP13936537	scaffold10885	728420	A/T	CACTGGGGTGTGTAGAACGTGC	ATGTATGGATTCCTCGCACACA	three_prime_UTR
SNP13936570	scaffold10885	750549	A/G	CTCTTGAGTGATGATGACCTCA	TACAAGAAACAGTTGCGGAGGA	exon
SNP13936692	scaffold10885	905081	T/C	ACACAGTGTTTCTTTGTTGCAG	CCTCTGTTCGGTAGCACTCAAG	five_prime_UTR
SNP13936712	scaffold10885	911169	G/T	TCTCTTGTGCTTGGGTCAAGCT	AACTTCCTGACGAAGGCCCAAT	exon
SNP13936775	scaffold10885	1008851	T/C	GCTCCTGTTGTTTCTGTTGTTG	GTTGTTGCTGCTGTATCTGAGC	intron
SNP13936837	scaffold10885	1094354	G/C	TCTGCGAATCTCTCGATTACAC	GGTAACGGTACCGCCTTCCTTT	intron
SNP13936897	scaffold10885	1148937	T/C	CTGTTACAGTTGGGAGATTTCG	TTCTCCGACACACAACATATGA	exon
SNP13936956	scaffold10885	1220183	T/C	CGACTCAAGCGAGTCAAACAAA	AGTCGTCCTCGTGTGTGCTTCT	intron
SNP13937014	scaffold10885	1249804	A/G	TGCCATAGATGGTTAGGTTTCC	CCATATCTATGTAGTCCAAGCC	exon
SNP13937042	scaffold10885	1326453	T/C	ACGTCCAACAACAGGCACAACC	CATACCAACAAGCCCAGCCCTA	intron
SNP13937057	scaffold10887	26689	T/C	CCTTACCTGTAATGCACACTTC	CACCATTTGCTCTAGCTGTGAG	exon
SNP13937235	scaffold10889	77812	G/A	TTGACGACCGCCTAGAAAAGTT	CAAGGCAAATAACCATTGAGGA	exon
SNP13937325	scaffold10889	193087	C/T	TGAAGGACAAGGATGAGCTGAC	ACCTGCGTGCTGACATTGAGTC	exon
SNP13937390	scaffold10889	281188	A/C	TCAGTGTAGATGCTATCGACCT	CTTCGGAGGATGTTATCAAGGC	exon
SNP13937466	scaffold10889	309879	C/T	CTTTCCTGGACTGGCACTAGAA	AATGGCACTACTGTGGTCCCCA	intron
SNP13937765	scaffold10889	829900	G/C	GTTGATCGCCTGCGACCAGTTA	AGTGGTTAGAGCGTCTGTCTAG	intron
SNP13937772	scaffold10889	842474	G/A	CCCAGGAAAACAAGGAACTCAG	CGTGTGGACATGCACAGGTACG	exon
SNP13937866	scaffold10891	117651	A/G	GGTCACCTTCAAAGTTCCGTCC	GAACGACGCATGCAAAGATGAG	intron
SNP13937952	scaffold10891	198562	T/C	TGTCAGGGAAACCAAAGGTGTT	TACAGGCCTGTAGAGGGAGCCA	exon
SNP13937983	scaffold10891	213049	G/C	AGTTACCTCGGCATAAAAGCAT	ACAAGTCAACTTTGCGTAGCAT	three_prime_UTR
SNP13938050	scaffold10891	304660	G/A	TCCAGCACTCGTTAATACTGTT	ATGTGATGGAGAGTTACTTCCC	three_prime_UTR
SNP13938157	scaffold10891	412911	G/A	ACTTCCTATGCTGTACTGACAA	ACTGTCTTGGAGGTTTGATAAG	intron
SNP13938249	scaffold10891	525669	A/C	GTGTTCTGGTGTTAACAACTGA	TTGATGACACTATAGCAGCCCA	exon
SNP13938253	scaffold10891	532068	C/G	TGGATGAGTGGGATGATGATGA	AGGAGTTCCTCGGCAAGTTCCG	exon
SNP13938278	scaffold10891	542329	G/C	ATAATCGATGGTATCAGCACAG	AATGTCATATCTAGCCTCCCAA	exon
SNP13938563	scaffold10893	221392	C/T	CCGTTGTAAAAGCAACACGGAC	GACCCCTGTTGGTAGAGTGAAC	exon
SNP13938702	scaffold10897	155230	G/C	GCTTCAACAAGACATATCCCCT	AGGTCAAGTCCAAGGTCAAGGT	exon
SNP13938782	scaffold10897	210964	A/C	TAGTTCCGACATTCTTCGATGA	CAACCGAACATCGACCACCAAC	intron
SNP13939452	scaffold10901	569932	A/G	GTTGGAATATACGGCTGCTGCA	GAAGTTGCTTTGTTCCTGCAAG	intron
SNP13939662	scaffold10903	190238	C/T	GTACATATGGCTCCATCACATC	TGTTCTTGTAGGCATTGACCCC	exon
SNP13939685	scaffold10903	285503	A/T	AAGACGACGTGAAGGCGATCAC	AGCTGAAGTCAGCACTTTTAGG	exon
SNP13939832	scaffold10905	82675	C/A	CCGGTAGGTGACCAAGACTTCC	GCCAACACATACCGTCGTTATG	intron
SNP13939847	scaffold10905	89861	A/G	TATCCTGAGAAAGGGTATCCAA	CGATCACATGCCATTTGTACCG	intron
SNP13939877	scaffold10905	147901	A/C	ATTCCTTATCCATACCGAAACG	CTCTAGCGTGTTTCCCGGAATG	three_prime_UTR
SNP13940141	scaffold10907	14609	A/G	ACCAGAGTCGTCAGCTAGAGTT	TCCTTTATTGTTGGGCACGAAC	intron
SNP13940159	scaffold10907	118727	T/C	CAGACACCTGCAATAACACCAT	CGTTGGTATGTAAGTTCTGTCA	exon
SNP13940202	scaffold10909	24335	T/G	AGGATGTGTGCAAACACCTTCC	TTGAGGTATTCAGGGTCCACCA	exon
SNP1394032	scaffold8335	404206	A/G	AACCAACCAAACACTATTGGAC	ACGTGAAGCTTATGGCAGGAAA	intron
SNP13940433	scaffold10909	251357	A/G	TAAAGATGATTGCTGCCATGTC	GACAGGAGGCAAAATTGGACGA	exon
SNP13940720	scaffold10911	123305	T/C	TGCAGCCTCCTTAGACTTTCTT	TTCCTCCGTTTCCTGCACCTCA	intron
SNP13940826	scaffold10911	332337	C/A	CTAGTTTTGGTGCTGGACTACA	GGCCAGGTTTCCTACCACCTTT	exon
SNP13940842	scaffold10911	370111	C/T	CCACAGATGTCCCTCCAATAAA	ATTTCCTCCATACTTCGCTCTT	exon
SNP13940879	scaffold10911	393992	T/C	TGGTAATCAGACGTACCTGTTG	CATTTGTACTGGTGCCACATCC	exon
SNP13941016	scaffold10911	555830	T/A	GTATAGGGGTTGTTGGTTGAGT	TGTCCTCTAACACAACCTTGGT	intron
SNP13941239	scaffold10911	979066	C/T	GTAGACCGTCGGCCAGGGTAAA	GCTCTAACACAGCATCAGCACC	exon
SNP13941288	scaffold10911	1385383	T/C	CCCAAGCTAAATCTAGGCTATG	TCGTGTTTTAGCCAGGGTACGC	three_prime_UTR
SNP13941394	scaffold10913	204947	G/A	TGTGGTAGCCGACATTGAAGAC	GATTGAGAGGGCCGTAGTATGA	exon
SNP13941576	scaffold10913	336222	C/T	CGAGGAAGGAGTTCTGGGCTTA	CCGAAGAGGAGCTTGATGCTCA	exon
SNP13941681	scaffold10913	390037	A/G	TTCCCTGGAACAATTTACTCTC	ATTGGTCGGGAAATGACCTGTA	exon
SNP13941723	scaffold10913	427928	T/A	CTTGATGCCACACCTGAAAATG	TTGGCCAACCTGCAAGGATACA	intron
SNP13941750	scaffold10913	438888	A/G	ATTTGTCAAAGGCAGCATGGGG	TGGAGAAGAAGGGAAGCCAGCT	exon
SNP13941753	scaffold10913	442126	G/A	CTAACCAGGATACACAGGACGG	GCTTACATGCCATCAGGAATGT	exon
SNP13941854	scaffold10913	490029	G/A	TATCCACCTCACCAGAGTCTGA	GTCGAACATCGTCACAACCTGT	intron
SNP13942001	scaffold10913	631446	G/A	GATTGAAGTGTACTTACCGAGT	GGTGCTACAAAGTACCAGGGCA	exon
SNP13942051	scaffold10915	14130	T/C	AGTTGAACGTCACCTGAGTAAC	GGCTTTCCTTTGCTGTTGGTTT	three_prime_UTR
SNP13942094	scaffold10915	96172	G/A	ACAGGTCCATGACATCAACGAG	GAGAGTGTTCTAGGATGGTGTT	exon
SNP13942166	scaffold10915	203274	T/G	GCTCTAAATCGCATGGTGTAGA	GAAGGTATTCACCAGGTAGAAC	intron
SNP13942212	scaffold10915	259965	G/A	GTTTACACTCATTAAGGTGTGC	GAGGCATTCTTTCTATCTCCAG	exon
SNP13942225	scaffold10915	278141	C/T	CCAGCAAACATCTTGTGGATAG	CTTGTCCTGTTCCCTGAAATCA	exon
SNP13942237	scaffold10915	302733	T/C	TAACCCTCCTAAACGTCAACCC	CACTTCATGCAGACATGCACCA	exon
SNP13942253	scaffold10915	316321	T/C	CTTTCTTGGTTATGGCTACGGT	AAGCTTGGGACTCTCATGGTTT	exon
SNP13942344	scaffold10915	364399	T/C	CATCATCTGTGCGGATATATGA	CATCATCAGTACCTAAGGCACT	exon
SNP13942378	scaffold10917	14942	A/T	CCTGGCTTCGTGTGACTGTGAC	ATGGACAGGTCAGTTTAAGTGT	exon
SNP13942416	scaffold10917	48108	T/G	TTTCATGCCAAGCTTCCGTTTT	TTTGACAGAAGTTGACGGACAG	exon
SNP13942473	scaffold10917	88659	A/G	TCACCTCGACACTAGAATCTGT	ACCAGTTGACTGCAAAGTTTGG	intron
SNP13942587	scaffold10917	236794	C/T	ATCCTCTTCCATACAAGCCAAG	GTTCCTCACAAATGAAGGCTCA	exon
SNP13942589	scaffold10917	242795	T/C	CAGCAGAAAGTGTCCTTCTGAT	CAGTGCCTGGGTCCTGGTTCTA	intron
SNP13942707	scaffold10917	331539	A/G	CTGCGTACTTGACTTCTACAAT	GAGTAGTGTCCTTCATGGAGGG	exon
SNP13942778	scaffold10917	402596	C/A	CTCCTAGAACGGCAGCTAGGAC	TCGCTGTAAACCATTTGTCCTC	exon
SNP13942911	scaffold10917	509891	A/G	ACCAGCAGTATTTACAGCAGCA	AGGAGAGGAAGAAGGCTGCAGA	exon
SNP13943158	scaffold10917	735075	G/T	AATGTAGCCCTTGGGCTTTTAA	CGGTCCTGTAGACCAAATTTGT	three_prime_UTR
SNP13943307	scaffold10917	854277	G/A	GGATGTACTCTGTCAACTCGGC	CAGCGTCATAATTGGAACTTCC	exon
SNP13943358	scaffold10917	883696	T/C	TCAACTGCCCTAAGGAGGCCAA	TCCACCCAGAGTTCCTGTGTCA	exon
SNP13943494	scaffold10917	986775	T/C	GCAGATTGTTGAGGCGAACTAA	TTAGGAAGTGAGCGTCCATTAT	intron
SNP13943514	scaffold10917	1024486	T/C	CAAAGGAGTGGGGCGAACATTT	TTCGTGATCGGTTTTCACTCTG	intron
SNP13943545	scaffold10917	1052829	T/A	AAAACTCAGGGTCATACGTGTA	GGTATTTGGAAATCCACATGCG	intron
SNP13943565	scaffold10917	1086055	A/C	AATCTTATACAGTGGCATGCGA	GGCGTAGTAGACCAATAAGATG	three_prime_UTR
SNP13943779	scaffold10917	1354587	C/T	GTGGTTTCTTCCGGAGTGCTCT	AGAACAAGCGATCTGGACTGGG	five_prime_UTR
SNP13943869	scaffold10917	1375309	A/C	GGTCAAATGCTTGCCCAATGGT	TGATCTCCTCAGCCTTCAGACA	exon
SNP13944035	scaffold10917	1577469	T/G	TACCAACAAGCGGTCCATTCAC	TCATCGGAAACCTCCCCTATGA	exon
SNP13944114	scaffold10917	1667439	A/C	AGTGGTGTATAACCCAGACCAG	TTACGCTGACCTTCTACAGGTA	exon
SNP13944277	scaffold10919	135595	C/T	TCGTGTGTCCATATTGTGATGC	CGTTTGCCCAAAATCTGATGAC	five_prime_UTR
SNP13944303	scaffold10919	144305	T/G	GAATAGATCAGCCATCTCCCAG	TTCAGTGGTATCCAACGCAACA	three_prime_UTR
SNP13944371	scaffold10919	204761	T/C	CCCTCTTACTACCCTACAGACC	TTCCTGTAACTCTGACTGGAAC	exon
SNP13944747	scaffold10919	383002	A/G	GTTGTGGCATCCTGTTCAGAAC	CGTCACTCAGAGAACATGCGAT	intron
SNP13944763	scaffold10919	481920	C/A	CCTATTCCAAGCGGCTAAGCCT	CCTCTTTGTGTGTCTTCCCATT	intron
SNP13944832	scaffold10919	512406	C/T	CTGAAGGGTTGAAGCTTCGGTT	GAGGTGTAAATGCGGTAAGTAA	three_prime_UTR
SNP13944950	scaffold10919	718398	T/C	ATGGTGGGTACGTTGAGGTGTT	ACATTGTACTTCCGGTACTTCG	exon
SNP13945378	scaffold10919	1240364	A/G	TGGACGGTAGGTTAATACGTAC	ACGTTAAGATGAAAGGTCAAGG	exon
SNP13945420	scaffold10919	1300051	G/C	ATGATGCAGAAAATGGCACAAG	AATTCCCCGAATACGTCGAACC	intron
SNP13945451	scaffold10919	1345889	T/G	GTTGTGTGCATTGGAGTGGTTG	GTTGTTGGCTCAGTTGTGGTTG	exon
SNP13945516	scaffold10921	93382	T/G	TGCTTGTGGATTTATGGGAGCG	AGTTGTAGCTGGAGCTGGAGCT	exon
SNP13945569	scaffold10921	194242	G/T	GAGGTTTCAACGATTAGGGCAG	GCACAGAGGAGGTGAATGTGTG	intron
SNP13945656	scaffold10921	329109	A/G	CGTTGGATTTCGGTTTTCGGGC	GATCAGAAGACCACTTCGGCGT	intron
SNP13945863	scaffold10921	703173	A/C	CGCCATGCACATGTAAATCAAC	GTTCAACGTCTGGATAAGAACA	three_prime_UTR
SNP13945922	scaffold10921	1116915	A/T	GTGTATCCATGTTTGCCGCTAT	ACAATCAGTGCAGAGCGACTGT	exon
SNP13945938	scaffold10921	1231646	T/C	CTACGGTTTGCAGACATTGTTG	GCTGTTATTGAAGATGACGAAG	exon
SNP13946043	scaffold10921	1439531	C/T	ATGCTCCTTTTGTGTCAGTCGC	CATGTTTTCTTTTCTTCGCCGC	exon
SNP13946153	scaffold10921	1891307	T/G	TCACTCTGGTGTGTATACATGT	TGTTCTGCCTCGTTTTCAATCT	exon
SNP13946234	scaffold10921	2013568	G/C	TCCAGAATCTCCAAGAACTAGT	TAAGCCAGTGGCTGAACCTCCT	exon
SNP13946306	scaffold10921	2180784	G/A	TTCGCTTTGTATGACGGGAAGG	AACCATGCCTCTGTCGGATAAT	intron
SNP13946441	scaffold10921	2426728	C/A	AACTGGTGTTGATCGTTCGGCC	GTAAGTCGGTCGATCTGGTGTG	exon
SNP13946489	scaffold10921	2465050	T/C	CATGGCACTAAAGATGCCTTGA	ATGGTTCTCCAGATGGTGGCCC	exon
SNP13946655	scaffold10921	2871580	T/C	GTGGTCAGACGTGTTTTGGCGT	TCAGTGCCTGTCCAGTGTCATC	intron
SNP13946671	scaffold10923	46675	A/G	GCCGACATCAGAACTTAGAATC	TCAGCCAAGCTCAGTTGTTGGT	exon
SNP13946693	scaffold10923	112496	G/A	TAGACCCGTTCAGATCAGGGTC	AGAGCTTGGTGGCAAGGCAGAT	exon
SNP13947075	scaffold10925	38236	T/C	GGCTTGGCTATGTGTCAAATAT	CACTCAAGGCCAGCTGTTATTT	exon
SNP13947145	scaffold10925	169107	C/A	CCAGAGAGGTGTTTTGCGGTAG	GGGATTTGCCGATGTGTGAAGA	exon
SNP13947146	scaffold10925	169161	A/C	AGCTTGCCAGGGAAAAGATGTC	TCAGTGGGCGAGCTTATTTTGC	exon
SNP13947265	scaffold10925	409832	T/C	AGTTTGTTCATCGGAATCTCGG	GGAACATACTCGTGGGCGAAAT	exon
SNP13947437	scaffold10925	503740	T/G	GCAAACTATACAAACCCACCTC	TAGCAGAATTGGCATCAACCTT	exon
SNP13947968	scaffold10929	473702	G/A	CTGTCGAAGCCCTCCGAAGTTC	CATTTCTCACTAAGGATGACCC	intron
SNP13948150	scaffold10931	84105	C/T	ATGTGCGATAGGTTGCTAGATG	GGTTCTGCCACTTCATTTGAAC	exon
SNP13948272	scaffold10933	33831	T/C	GCGGTTGGACAAAATTGATAGA	TATGCGATATAGTGGAAAAGGC	intron
SNP13948837	scaffold10933	775404	G/A	TCGCAGATATGGTCACCACGAA	AGGAGGACAGGTAACACTCTAA	exon
SNP13948851	scaffold10933	777592	T/G	TCAAGCAAAGTGTGGCAGACCA	TTTGATGACCCAAACACAACCT	intron
SNP13948983	scaffold10937	413702	G/A	CCACACAAAGCTTTCCCAGGAG	CTGCATCAAGTGCAATCTGGTC	exon
SNP13949053	scaffold10937	452911	T/A	TAGTGTTGACAACGTCAGGTGG	TGGACCACGAGGAAGCAAGGAG	intron
SNP13949214	scaffold10937	644320	G/A	AAGGACCGTGCCAGTTTATTAC	CTGTGTGCCAGAATCTCACGAT	five_prime_UTR
SNP13949401	scaffold10937	850623	T/C	TGTGTATAAATCTTCGGGTGAG	GATAGTCACGATGGCCTAAATT	intron
SNP13949516	scaffold10937	1027250	A/G	CCTGTCTTTGTCCGCTACTTGA	CTGGTCAGTCACGAGTAGCTAC	five_prime_UTR
SNP13949527	scaffold10937	1117771	A/T	GTGCAGAGTAATTCCACTTTCA	TAATATCTCATTTGGCCAGCTC	three_prime_UTR
SNP13949545	scaffold10937	1149911	A/T	GTGCAACGATTTTCCATGTAAC	ATCTAATTTCCGGTTGCTGATC	intron
SNP13949549	scaffold10937	1169921	T/C	ACAGCACTGACGAGTGCCAACT	CCTGGGAAGAGGACACGTTCAG	intron
SNP13949634	scaffold10939	211998	A/C	TCGGCTAAGGTTGACAACCCTT	GACTCCATTTGGCAGAGTATTG	intron
SNP13949729	scaffold10939	392952	C/T	CGTCAACGTGCACTTTCGTGTA	GCATCTTCGTTGGGTCCAGAAC	exon
SNP13949809	scaffold10939	478234	T/C	ACGACCTGCTCAGGGAAATTGA	TTCTTGCATAAGGCCAATCATG	five_prime_UTR
SNP13949967	scaffold10939	609787	C/T	GCACCAGACAGGAAAGATGTAT	GCACATTGATGTAAAACCAGCA	intron
SNP13950174	scaffold10943	42875	T/G	CCGTCCGATTGTACATCGTTCA	AACAGTGCAGATTGATTTGCAG	exon
SNP13950349	scaffold10945	75688	T/A	ATACCTGGGCTGCTGAGATGAG	GCTTGAAGTCCCCAGAAGTATC	exon
SNP13950356	scaffold10945	109027	G/A	CAACCATGATAAGTTGGTGAAC	TAGGGCAGAGCGTGACACACAG	exon
SNP13950361	scaffold10945	123905	C/T	AGGCGCATCTGAAATCTGTGTA	CAGAATGTATGAAACGTCTGCA	exon
SNP13950393	scaffold10945	152268	A/G	TTTCGTAATCCGGGTCCTCACT	ACATGTCTTTGCCTCCCTCTGC	intron
SNP13950452	scaffold10945	206012	C/T	CCATCTCTGCCATCACCAACAC	CCACCACCTCTTTCAGCCATGA	exon
SNP13950455	scaffold10945	213601	A/G	GTGTGCTGGGAATTCTGAGAAA	CTTCCTGTCCAAACAGTACAAA	intron
SNP13950696	scaffold10945	405081	T/A	ATCGCCTACAGAAAATACTGGA	ACATCAAACTTCAGATGGCCCT	intron
SNP13950777	scaffold10945	445761	G/T	ATGAAGACTTCCGACAATCGCG	GTCTTCGGTCACGAACGACCAC	intron
SNP13950843	scaffold10947	53166	A/G	GCAGCTGAGTATGGTAGTACCG	CATCAGTACTGGTTCGGAGCTA	exon
SNP13950875	scaffold10947	124194	A/C	TGTAGTTCTGGATGTCCTGTTC	TTTTCTTGGACTGCTCATGGAG	exon
SNP13950876	scaffold10947	124721	C/T	CAATGATCTGACTCTTCAGGGT	TCTGCTGTTCCACATCACCCTT	exon
SNP13950877	scaffold10947	125222	G/A	CCGACACCCTGTTCTGGTTTTC	TCAGCTGGTCAGTTGTGATGAG	exon
SNP13950880	scaffold10947	125605	A/G	ACTTGGAGTCGAGGTCAGCCTT	GCTTCAACTCGCGCTCTGTCTT	exon
SNP13950881	scaffold10947	126619	C/T	TCTCCTCACACTCAGATCTGTC	CTAACTTCTGTTGTTGGGCTGA	exon
SNP13950940	scaffold10947	147341	C/T	TACAGATTTCTGAGAAGACGGA	GATGGTGGTTCGGAGAGATTAA	exon
SNP13951050	scaffold10947	275635	C/T	GAGAGCACAAGAACAGCCACAT	ATGAACTCCTGTCGGTGGTAAC	exon
SNP13951085	scaffold10947	304037	T/C	CAACTCCCGAAAGAGTTTGAAA	TACCCTGAACAGGTAAACCACT	exon
SNP13951103	scaffold10947	375048	G/C	GTGACTCTGACTAACGAAATCT	CACCAATGAACACTCCCAATAC	five_prime_UTR
SNP13951217	scaffold10949	389200	A/G	GGCATACAGCTAGGGAAAATAA	TGAGTACGGCTGGTCTGAACAT	exon
SNP13951784	scaffold10951	210484	C/T	TACAAAGACTGACTGAGGAGTT	ACTCCAGCATTCTCGACAAGGC	exon
SNP13951898	scaffold10951	348774	C/G	CTAGTTTCACGGCGTAAAACCT	ACTTAGGGCATCCCCAGGACTA	intron
SNP13951964	scaffold10951	384091	G/A	CCTGTTTGCCACGTATTTTCAA	CGTTCAGTCTTTCCAGATCTGA	exon
SNP13952044	scaffold10951	495753	A/G	TCTGTAGCTAATCCGGCATCCT	TGTGTGTGTGACCGGGGCATTA	three_prime_UTR
SNP13952108	scaffold10951	552597	C/T	ACCAGCCGTTCAGCTACACGTT	AAGGACTAACGTCCGTTAGAGT	exon
SNP13952165	scaffold10951	570116	C/G	TCTACAGTCCAGTCGGGTCAGT	TCAGGAGGAGTGTAACGTAACG	intron
SNP13952201	scaffold10951	617798	C/T	CGCTGGACGCGACGTATAATGA	TGTCAAGTTTACGTGGTAGCAT	five_prime_UTR
SNP13952312	scaffold10951	662748	T/C	TATGGCGTTCCGTTTCGTCATC	TGTCATTTTCTCCCTCTTCTGT	exon
SNP13952466	scaffold10953	15160	G/A	GGGTCACAGATCAAGGAAACCC	ACGAGCCTGGTGATGTGACTGT	exon
SNP1395249	scaffold8335	519393	G/A	TCACGAGGACGACAATTTTGAC	AGAAAGTTACGGACCGTGCCAA	exon
SNP13952574	scaffold10953	52362	C/A	CCTTGGAAATGACATTGGTGAC	TGCACTTATTGGCGAGAGTGCC	intron
SNP13952589	scaffold10953	95306	C/T	TGCGGGCTACGGACTATTAAAT	CCACTTGACCAATAAAGGGAAA	exon
SNP13952707	scaffold10953	420400	C/A	CAACAGAAGGTAGCCAGTCTTA	AAGGTTGGTTTACATCAGACGA	exon
SNP13952815	scaffold10953	580492	A/G	GTTTTGGTATAGCAACAACCCG	TCACTTCCTGGCTACCGATCAA	intron
SNP13952842	scaffold10953	721661	G/A	ATCATCCAAAGCATCGTCCCAG	TGAGGGGAAGGAGGAACATGCA	intron
SNP13952955	scaffold10955	129979	G/A	TTTTCTGTGGTGTTAGCCCCTG	TGTTGGGACGGGACACCTTTAA	intron
SNP13953013	scaffold10955	244958	C/T	GTACTTCATCACTAACTGGTGG	TGAGGGAAGAAAGAAGAGCCTT	exon
SNP13953154	scaffold10955	411244	T/C	GCAGGGTGATGATCTGATGGTT	TGATGATGGCATCATTGAGAGG	exon
SNP13953216	scaffold10957	49146	G/C	CTATCACATCGCGCACATCGTA	TCCGTGCTTGCTGTAGGATAAG	exon
SNP13953303	scaffold10959	115050	G/A	TATCCACAGTAGACAGGTAGGC	GTTACACCTGTCCATGTGACAC	three_prime_UTR
SNP13953359	scaffold10959	381105	C/G	GTTCGATGGGGTTTTCTTCCAG	GTACTCCCCGAAACCTTCACTA	three_prime_UTR
SNP13953394	scaffold10961	5868	A/C	GAGGAGAGTCTGTATGGTTCCA	GGGCGGCTCTTATCTGAAATAC	intron
SNP13953464	scaffold10961	36576	G/T	CTGGGGTATGACTCGGAGGACA	CATGAAGACATGGTCCAGGAGA	exon
SNP13953465	scaffold10961	36622	C/T	AGATCAGTGAACTCGTCCACAG	TTGTGACGTCCACACTAGAGGG	exon
SNP13953474	scaffold10961	38849	G/A	TGGACAACCACTCAGACTCCGT	ACCAGTGTGGACACATGTGTGT	exon
SNP13953629	scaffold10961	221578	C/A	AGTTCAGGACGTGTACACTGAC	CGGATAATGTCTAGGCCAGGTG	exon
SNP13953939	scaffold10963	42119	C/T	TACGACCACAGACTTTGCGTTG	TGTGCATCCCCATGTGCATTGA	three_prime_UTR
SNP13954139	scaffold10963	272232	T/C	TGTTCCGATATACTGCCTCCTC	CGCTGTAGTGCTGCACAATTCA	exon
SNP13954237	scaffold10963	342257	G/T	AGGACACTCACAGATCACTAAC	ACCAGAGGCCACTTTGGTTGAA	three_prime_UTR
SNP13954444	scaffold10967	34159	C/T	TTCTGCTTGAGCTTCATGGCTA	ATGTCACGTTCGAACCGTTCAC	intron
SNP13954646	scaffold10969	148261	A/T	GTTACCCTCGGTATCAAGTTGT	ATGCTCAAAATGTCGAGTTGGC	exon
SNP13954667	scaffold10969	176395	T/C	TACGCGTGTCGAGCGATCAAGT	CACCTCACCTCCAAACATCACA	exon
SNP13954698	scaffold10969	204052	A/G	GACCGTTGAGTGTCTGCAACAG	CTTTCCTCTGTTCCGACATTTG	intron
SNP13954837	scaffold10969	418999	C/A	CATAGTTCAACTGTGCACAGGC	GCGCCAGCTGTTGTTGTGATGA	intron
SNP13954900	scaffold10969	463474	G/T	ATGTCATACGGAATCCACATCG	TTGTTCATGTTCGGATTCCTGA	intron
SNP13955344	scaffold10969	674430	C/A	AGAAACGAACGAAATCTCAGGA	ATGCTGCCATGGATACAGAGTC	exon
SNP13955345	scaffold10969	674469	G/A	ATACAGAGTCCTCCCAACCGTC	AGAAAGCTGATAAGGTGGATGA	exon
SNP13955505	scaffold10969	782486	C/T	TCTCCGCACAATCTATGGCATC	GGTAGTTCCGGGTAGCTAACTC	intron
SNP13955532	scaffold10969	807899	G/A	CTGGTGACAGGCGTTGACTACA	GAAAGCAGAAGACGAAACTGTA	exon
SNP13955683	scaffold10971	581087	C/T	CGTGAGGTTTCATACTGTTCTA	TATGTGACGTCAGTAACAGAAG	exon
SNP13956110	scaffold10973	276892	C/G	CACCTCAGTCACGTACGAGTGA	CGATGACGTCCGATAGTGCCAC	intron
SNP13956209	scaffold10973	367845	C/G	AGCCGACAGTTCAGCGAGTATT	AGCGATATAATCTACCTCTGCC	intron
SNP13956443	scaffold10973	735619	G/C	AGTGTCAAGCTTGATATACCTG	TCCGACACAAACGCTTCTGGAA	exon
SNP13956453	scaffold10975	16971	A/G	TGTGGGTCCTCTTTAAGTCTAT	TATTACAAGGTAGAGCATGCTG	three_prime_UTR
SNP13956504	scaffold10975	104090	T/A	AGGACTTAGACGGTGATGTGCC	CGGTAACACCAGTATCATGGAA	exon
SNP13956613	scaffold10975	281843	A/G	GGTCGGTAAGAGCGATAGTACA	TTACAGTCCAGGGTTCAAATAC	three_prime_UTR
SNP13956847	scaffold10975	857916	A/G	TGAGCATGTGATGTGAAGCTAC	AAAGTGAACGTGTGAGGTCAGA	intron
SNP13956936	scaffold10975	926350	T/C	AGTCCAGCATGTCTGTCTTGTT	CCAAGATGACTGGTGTCCGATG	exon
SNP13956985	scaffold10977	14695	C/T	ACAGTGTAACGAGGTTAAGCTT	CCTCCCCGGGGTCACATTGTAT	exon
SNP13957155	scaffold10979	168824	C/T	ATACCGCGCACACTCACCTTCA	GACCTCTGACCCAACTGTTAAC	intron
SNP13957487	scaffold10979	460196	G/A	ATGCATGTGGCCTCAGGATTTA	CCGAAACAAAGTAGACCTCTTT	intron
SNP13957502	scaffold10979	477154	G/A	ATCGGCATTGAAGTTCGGTGTC	TCTGTAATCTTAAAAGGCCAGG	three_prime_UTR
SNP1395758	scaffold8335	567601	A/C	ATGTCTGACGTCAATGTTGTTG	GACAGGCAGGAATTAGAGGAGA	exon
SNP13957605	scaffold10979	571229	A/G	TTATTTTGGTAGGAGTCGGGAC	GAACCAGACATTCCAGTTTGGC	exon
SNP13957833	scaffold10979	1422805	A/G	TTATCTGTGGCAGCACTAAGCA	TGTCCATTCCGACTCCAACTGC	exon
SNP13958095	scaffold10983	31005	T/C	AACAACTGCTGACCTGTCTTCC	CGCTGAATGGTGTTGGATTACC	intron
SNP13958363	scaffold10985	254576	C/T	GAGTGGTGATGATGGTACGCCC	ACACCAGCAACTTTAGGGTCTG	exon
SNP13958368	scaffold10985	268498	T/G	GGGGTGTATTGGAGGCCTCATA	AGTGATCACCATCTGCATCTGT	exon
SNP13958518	scaffold10985	490389	C/A	CTGTCCAGACAATCTTCGAAAA	ACCTCCTCATCTGTCTGCTCAA	intron
SNP13958580	scaffold10985	570785	A/G	GATTTCGGACTTTTCGGCCCCT	CACCAATCAGTCCTTGAAGGAA	intron
SNP13958588	scaffold10985	574901	T/C	CCTACGAGCTGTCAGTTTCCGG	CCTCTGTGAATTGTACAGACGG	intron
SNP13958594	scaffold10985	582390	T/A	TTACAGAGTTGCTCTCTGGATA	TTCTATAGATCGTTTGGTGCTC	exon
SNP13958856	scaffold10985	903867	A/G	CAACCTTCTCCATGATCTGCTC	AATCTTCTGTTGTCACATGCTC	intron
SNP13958872	scaffold10985	917695	G/A	TATTCCAGGCGGTCATATCATT	TCTTCTGGCTGATTGTCACAAG	exon
SNP13958888	scaffold10985	936532	C/T	CCACCAACATCGAGGAATCTGA	AGGATGAGATGCCACTGGTAAG	exon
SNP13958918	scaffold10985	946540	G/A	GTCAACAGAAGGTTAAAAGACG	TTCCAAACAAACACCTCGCTAA	intron
SNP13958976	scaffold10985	1023022	A/G	GTGGGTTGTCACTGATGTTATA	CTTTCTTTGGTCCCTCCTTAGC	exon
SNP13959093	scaffold10985	1174192	C/T	CACAGATTCCAAAACCAGAGAT	AGGTCAGAAAGAAGTGGATACA	exon
SNP13959128	scaffold10985	1192457	T/C	CAATTTTGCCTCGCTGCATAGC	CGAGTAGTTCATCCTTTTCCTT	exon
SNP13959137	scaffold10985	1205182	T/C	CTTCTAGTCTGGAGCGACAACG	GCTCCTCCATTAGTGAATCCAG	exon
SNP13959309	scaffold10985	1347334	A/T	TCTGAAGAAGGCAGCTCTGTAG	TGCTACACTCCGCAGTACAAGA	intron
SNP13959649	scaffold10985	1603851	G/A	ATGCCTTTGAGCGGTTGTTGAG	GACTGAAACATCAACAGGAAAG	exon
SNP1395976	scaffold8335	582536	T/C	AACTTACCCTGATTGATTCAGC	CTTCAGCTTCAAGGGTGATCTT	exon
SNP13959788	scaffold10985	1685471	G/T	ATAGAGGTTCCGATGATAGCGA	CGAGTAGATGAAAGCGATACCA	exon
SNP13959848	scaffold10985	1710689	C/G	GGCCAATTCTGTCGGACATGGA	AAGGCAAAGATTCGTCTAACGT	intron
SNP13959860	scaffold10985	1716686	G/A	AACAACGAATTGAACGTCGTGG	AAACGTGGATGGTGTGATCAAG	five_prime_UTR
SNP13959931	scaffold10985	1726000	A/T	TTTGCTGATAGGTTCTGGTTTG	CACTTGTTTCAGGGTAGGAAGG	intron
SNP13960006	scaffold10985	1802893	C/T	AGGCTTCTAAACAAGGCAACGA	CCACCAAACAGCTGGGGAAATG	exon
SNP13960034	scaffold10985	1816686	T/C	TCCACAGCGTCAGGTCTATATC	TACTGTTACACGTTGTGAGTGG	intron
SNP13960053	scaffold10985	1828309	G/A	TGTTGCTGACTTTTCGAGGACT	GAGGTTGACCTTTCTTGCCCAA	exon
SNP13960160	scaffold10985	1892708	C/T	ATCTCCTCCAGAAACAGGTCAT	TGACCAATCACATCCGAGAACT	exon
SNP1396022	scaffold8335	594912	G/T	CCTCTACTGTCATGTTGCCCAT	CTCTCTGGTGACCTTCCAGCGT	exon
SNP13960248	scaffold10985	1928413	A/C	GCTCAACAACAGTTCAGAAAGG	TTTGCTAAAACTGCGATTGCTG	intron
SNP13960355	scaffold10987	117245	A/G	TGCATCCATAGATATCAAGGCT	GAATTCCAGCGGGCGACACATA	intron
SNP13960395	scaffold10987	162177	T/C	TGCTACAGGGAAGGTACAACTT	AAACAACAGGCAGACACTCACT	exon
SNP13960410	scaffold10987	175923	G/A	CCAGGCCATACTCTGAATACAG	TGGTTCTAACACCATCAAGCTC	intron
SNP13960424	scaffold10987	190483	G/T	AGGATTTGGCTCCCCAACTGAC	TAACAGTCCTGGGCAGGTTTTC	intron
SNP13960528	scaffold10987	255508	C/A	TGAACGGAGAAACACGGTTCTC	TGGAGTTGGAGTCGGCCAGAAG	exon
SNP13960638	scaffold10987	375845	G/A	CCAGCGTGGGTTTAGTTTTGTG	TGACCACCTCCAGCGGAATATC	exon
SNP13960691	scaffold10987	446370	A/C	TACCACAGCACTAGGGGAACGC	GCCAGAAGAAGTATGGATGACC	intron
SNP13960773	scaffold10987	493091	A/G	CTGAGTAGAGTTATCCTCAGGG	AGGGAGCTCCTCCTTAAATTCA	intron
SNP13961015	scaffold10987	1090147	G/A	TTCAAAACCACATGGTAGGAAG	GATATGCTAGCCGGAACGTTAA	exon
SNP13961034	scaffold10987	1101783	A/G	GTTTACAGGTGGATGCTGTAGT	ATCTGGACTACCTCAAGTCCTC	exon
SNP13961058	scaffold10987	1110014	T/A	TACGTTTCGGATTAATCTGAGC	GGTCTGATTGTGTCATAACGAT	three_prime_UTR
SNP13961071	scaffold10987	1214454	C/T	AAACTGCCGATGTCGAGTTTGT	TCATCAACTCGGAGGTAGTTAA	intron
SNP13961119	scaffold10987	1335870	T/A	TGACGTTCTGTGTGCTTCTGGA	GACAAATGCCTTCCAGTGTTTT	three_prime_UTR
SNP13961121	scaffold10987	1337940	C/T	GGTATAACGACTACGTCTGCAT	GCCTTCAGCAAGACTTCTTAAA	intron
SNP13961144	scaffold10987	1362712	C/T	CCATAGTGTCCATGATGGCCAA	CATCCAAATCTACCGCCACTCC	exon
SNP13961237	scaffold10987	1409062	A/G	AGTTGCCCAGTTGTTGTTTCAG	GCTAATACTGTGTGGCCAATGT	intron
SNP13961307	scaffold10987	1430357	G/A	TCAAGACCCCAAACCTCGACAG	CTGCTGAAGGTGTTAGACTGGA	exon
SNP13961364	scaffold10987	1450745	C/T	TAGAATACCCTGCCTCCCGCAT	CAGGAAGTGTGGGACTATCGCG	exon
SNP13961457	scaffold10989	175145	A/G	TGATGCATTACCTGGCTAAGGA	ACACAGCCAGGGTTTGTAAACC	exon
SNP13961986	scaffold10991	534430	C/T	GTGGCACAAACTCTGATGTTGG	TGCTCTCCGCCACCAGTAACAT	exon
SNP13962165	scaffold10997	208159	G/C	CCAGATCACACATTCTTCCTGT	ACTACGAATGTGAAGTAGAGCT	intron
SNP13962228	scaffold10997	283585	T/C	TATAAGCTTCGTCCCAGCCTCC	TACGCATGTGTTCCGGGACAGA	intron
SNP13962234	scaffold10997	288738	A/G	ATGCCTGAAAAGCAAGACTGCT	GCTTCTAAATGCCCAGATCAAC	exon
SNP13962262	scaffold10997	295066	A/G	CGTACACTTGCATCTGCATGGC	GGAGTAACATTTTGAGTCCCGG	intron
SNP13962604	scaffold11005	287874	T/C	TCTTTGTTGTCGTCGACGTGAC	ACTTCCGGAACAAGTGTGGCGT	exon
SNP13962664	scaffold11007	154874	T/C	TCTCTGCAAATGTTTCACCACT	TGGCACTTTTCGTAGCCCATCT	intron
SNP13962721	scaffold11009	13852	C/T	CCTTCTGTCCTCAGTCAAACAC	AACTGATTTTGGTGAGATGCAG	intron
SNP13962823	scaffold11009	175268	G/A	GCGTCTGTCCAAAACTGCCAGG	AACGGATTCTCTCCACAGCGTC	exon
SNP13962824	scaffold11009	182761	A/G	GTTGTGAATTGACGCTGTGGAG	CCGTAATTGCCCTGGCGGTTTT	exon
SNP13963061	scaffold11009	417884	A/G	CTATGACCTACCCTCCTCTGTA	CACAGTACCACGGTCTATCCCA	intron
SNP13963233	scaffold11009	980949	A/G	GGTAAAGGCGTCTGAGCATCTA	ACTAGGTTGCGGATTTGAGTCC	intron
SNP13963256	scaffold11009	1069714	G/A	CCTCACGTGGACCTCATCCTCA	CTGCTCAGGGGTACATATGTAT	exon
SNP13963356	scaffold11009	1309228	C/G	TTGCTTGCTGGTTTACAGGTGA	GTTGACGCAGACATTCGGGTTA	exon
SNP13963479	scaffold11011	121493	C/G	CCATGGTCCGTCTAAGGAATCC	GAGAGAAGGAGTGGAAAGGAGC	exon
SNP13963531	scaffold11011	150865	C/G	GAAACAGTACACATGTTTTCGG	GTTTACGCCAGAATCCCCTCAC	exon
SNP13963533	scaffold11011	152109	C/G	AGCAGAGGAACAATATGATCGC	ACAAGGACCAGCTGCAGGAAAT	exon
SNP13963697	scaffold11011	459286	T/C	TAGAATGCTGGGTCTGAGATAA	GACAACCAAAAGTATGCCCAAA	three_prime_UTR
SNP13963893	scaffold11011	793030	C/T	TGACTGGGTTGTACATGTAGTT	GAGAAGCAGGGGAAGCTAGGTG	exon
SNP13963953	scaffold11011	863707	G/A	TGAGGACACTGATTTCAGAACC	AGGAGAAAACAAGGCCGACGGT	exon
SNP13964224	scaffold11013	920598	G/A	TGTCATAGTGGACACGAATCGG	ATTGGAGGACGGCTGAGGACAA	three_prime_UTR
SNP13964287	scaffold11013	957023	G/A	ATGGAGGAAGCGACCAGACTCG	ATCGCTCTCTTCGGCTGGAAGT	intron
SNP13964319	scaffold11015	250927	G/A	GCATAGTTACGTCTGGAATCTG	ATGGAGTTGATGAGCTCCTCCG	three_prime_UTR
SNP13964372	scaffold11015	736438	T/C	AAGTCTGTAGTGGTGGTCGCAC	TCATCAGGGAAGCAGTTCCACG	three_prime_UTR
SNP13964424	scaffold11015	824018	C/A	GATGGGTGTGGCTGACAGTCTT	CTGCTATCTTGAAGGTCCTGAC	exon
SNP13964518	scaffold11017	174376	A/G	TCCTACCAATAGTTCGGAGCTA	GTACCATTTATTCTCGTTGCCA	intron
SNP13964566	scaffold11017	305120	C/T	TCCAAGTCCCGGTGAAACAACC	TTCTAGCAGGAACAAGCAAAAC	exon
SNP13964569	scaffold11017	308843	T/A	AAGAAAGGATGGGTGACAAAAC	TTTTCGGTTATCCATGCGATCT	exon
SNP13964601	scaffold11017	383400	T/C	ACAGATTCTGTCTTCGGCAATT	TAATCATCGGAACTGCTCGTTA	three_prime_UTR
SNP13964634	scaffold11017	506999	A/G	GAATCTACGTGTTGGGGACCGG	CGTGCAAGTAACCCAGGCTAGC	intron
SNP13964815	scaffold11017	693182	T/A	GAGAATCACAGAGTCCATTTCT	TTATCCAGATTTGAAGAGCAGG	three_prime_UTR
SNP13964986	scaffold11019	233659	G/A	ATACTCACGATCAGGTCCTGAC	CTTCCTCTGCCAGGTATTTGGT	intron
SNP13965429	scaffold11021	149949	A/G	CCGGTGGAGAGAATGTAAAGCA	GGTCTGGGAAGTGAGGTTTGAG	exon
SNP13965458	scaffold11021	203134	A/C	GAGAGTGTTAGAGCAAGGGCCA	ACGGAATGGCAATAAGACAGAT	exon
SNP13965478	scaffold11021	239576	T/C	GGCCCTTCATTGTGAATCACAT	ACGGTTCATCATGTATATGCTG	intron
SNP13965510	scaffold11021	255663	G/T	ATGAAGTCTGCCATCATATGCT	ACTTTCTCGCTCTGACCTACAA	exon
SNP13965541	scaffold11021	306908	A/G	AAAGGTTGTGTTTGGTGAGCCC	AACGCTGTTCCTCACGGAGAGT	exon
SNP13965549	scaffold11021	379931	T/C	TTGGTCACAACTCCACTGACAA	TCCTTCCAAAGAAAGTAGTGGA	exon
SNP13965626	scaffold11023	46520	A/G	CTGCAGCCATCACTTACTCTGC	GAATGTCCTTGAGTGACCTCTG	exon
SNP13965674	scaffold11023	468579	G/C	GTTTCATTACCAATCTCGTGGT	ATCTGGAGTCGGAGTCTTCGGA	exon
SNP13965692	scaffold11023	512686	A/T	CTTTATTTCAGGCCGCATTTAC	TTATTGCAGCAAACATCACCGT	exon
SNP13965811	scaffold11025	444021	C/T	CAAACTCTCCATACATACCAGC	ATGCAGACTACCAACAGATACC	intron
SNP13965974	scaffold11027	74461	T/G	GGAAGCTTGACACTAAACTGTA	ATAGATCTCCCCAGTCCCCTGC	exon
SNP13965980	scaffold11027	99673	T/A	CTGTGCTACTATCGGTGATGTA	GAGATCATTGGAACTTTCCGAC	exon
SNP13966217	scaffold11029	171708	T/C	GATGGGTCTGATGCGTCATTTT	TGTGACGCAAGCTTGACGGAGA	exon
SNP13966254	scaffold11029	223558	G/T	GATCACCCATGGCGGTCTACGA	GTCGTCACCTCTAGTACTGCGC	exon
SNP13966262	scaffold11029	233646	G/A	ACGGACGTGTCGACATGTAGGA	GTTATCCCCGGTTTAAACTTCA	exon
SNP13966325	scaffold11029	254190	G/A	CAACTTCCAGTGTTCCTACCAC	CAACCACCACACGAACTACTGC	exon
SNP13966365	scaffold11029	297882	A/T	GCATCACAATTAGCGTTGGCAA	GCCTCGATGTGTGAGGGTGATC	exon
SNP13966387	scaffold11029	306191	A/T	CCGGTGACGTCCTCCTTGTTGT	GTAGTGGTGAGTTTGTACAGTT	exon
SNP13966499	scaffold11029	438763	G/A	GACACAGACTACTGACCCTTGA	AGTCCAGTTTGTCCTCCAGCCA	exon
SNP13966679	scaffold11031	323069	G/A	TGACAGGCATTGTAAGGAAGCC	AAGGAGCCAAGAACGAAGGAGT	exon
SNP13966761	scaffold11031	394708	C/T	TGGGAACATTGTGGAACTCAAA	ACGGTAATCTGTTACTGACCAC	exon
SNP13966886	scaffold11033	171770	T/A	AGACTCTCACTTGAACACGCTA	GTCCTGAAGTACTGGTCCAAGA	three_prime_UTR
SNP13967039	scaffold11033	374214	A/T	TCTACGATGTTACGGATGCGCT	AACTAGGAATGGAACAGATCAC	exon
SNP13967109	scaffold11033	395259	G/A	TGAAGAGTGGGCTCACAGCAGA	GGGAAACAGTGGCTGCATATTC	intron
SNP13967154	scaffold11033	405879	C/T	ACTGTTGGTAACACCTGTCAGC	TATCAGCAAAGTGCTGCCCTCT	exon
SNP13967180	scaffold11033	423404	A/G	ATTGATCGAGATACGGAGCGGA	AAACGATCACCAGAAAGACGGT	exon
SNP13967256	scaffold11033	457600	C/G	TTCCATGTTGTCCGCGATATTG	AACTGTCTTTCCGGGTTCCGCA	intron
SNP13967307	scaffold11033	482328	A/G	GGACGCTAGGACCCATTTTCGT	ATTCCCGGGCCGTTGTATCCTT	exon
SNP13967418	scaffold11033	576058	T/G	TGCAGAAGACGATGAACTTTGC	CACCGGCTGTTGAAAAGAGTGG	intron
SNP13967487	scaffold11033	596669	C/T	CAGCATCTTGTTTTCTACGAAG	TGAGTTCCAGATGGGCTTCTGT	exon
SNP13967597	scaffold11033	747804	T/C	TTACTTATAAGTTTGGTGGCGG	TCGGGCAGTAGGCTAAGATCAA	exon
SNP13967614	scaffold11033	786198	C/G	ATTCAGAACCAGTGATACACCA	GCAAGGAACAGCTGCTAGCCTG	exon
SNP13967766	scaffold11033	845504	G/A	ACGCCATACAGCATCTGAATCC	CGGTTGTGGATATCAGTACAAA	exon
[truncated: 10,474 more rows]
