# Supplementary material for: HD-Marker: a highly multiplexed and flexible approach for targeted genotyping of more than 10,000 genes in a single-tube assay
Source: HighWire-hosted journal article supplement (doi:10.1101/gr.235820.118), 2018-11-08
Supplement: Supplemental_Table_S12.xlsx [file Supplemental_Table_S12.xlsx]

## Sheet: Sheet1
Table S12. Summary of probe information for microsatellites.
SSR ID	Motif	5' locus-specific-seq	3' locus-specific-seq	Capillary-based validation
CFML02	CT	CTCCTCTCTGACGCCATCCC	TACAATCCCTGCTCCTCTTT
CFZB111	GA	TGTGAGACTATACTAGCTGAT	GAAAATAGGATAACCTCAATATT
CFZB125	TC	ATTTTCTGAAGCTATTACCCTA	AATGATTCCCTTTACCATAACA
CFE02	TCT	CATCCTTAACTTCCCTCCTT	AGAGTTTCACACGATTCTTC
CFE03	TCA	ACTCAGCAAGACCCCTGATA	CGGTCATTGTCTTCATCATC
CFML04	CT	CTTGCATTCCCAGACTCTCG	GTTTGAGGCAGTCTTGAGAG
CFE11	CA	CGCCTGCCCTTGTCATCT	GCAGAAGTCATCAATCATCATCTAC
CFE12	TA	GTCACAACCATAGTGTTTGT	CAATGCTTAAAGCTGTGTGG
CFE14	AAAT	TGTTTAGACCACCCACTGAA	AACAAGGTCGCCTTATGTAATGCAT
CFE19	GTTT	GACATGTAGAGCACTATATTAC	TATGTCCTGTATACAGCTCT
CFE23	CCAA	ATATGGCACCCAACCTGTGA	CTTCTTCAAGTACTGACGATT
CFE30	TATC	CGAGCAATTCAAAGTTCAGG	ATACCACTCCGGACATGCGT
CFSG02	GA	AAAATTAATCGATCGATCGATC	GTCTCCCCCAACACAGGTGA
CFAD035	GA	TTACACAATCATATGTATAGCA	TTTACATAATGTGAACTGTAAC
CFAD104	TG	GATGTAACAACCAGGGCTTC	CATTGCCTTCTATCTTTTCAGG
CFAD157	CT	TCTTTCCATCCCATACATTG	TTATATTTACTTGTTCCCACTG	√
CFAD183	CT	TCTCAATTCTTGTCCTACAATC	TTCTAACACACTGCATTCTTTT
CFAD208	CT	CTCTTTGTCTTAGTCACAAC	TCATGCCTGTTTGTTTTGTT
CFAD213	TC	AATCATTTCACTATCTTTCTA	CTCTCCGCCCCAGTCTCTGT
CFAD243	TG	TGTATGAGATAATAGCTAAACC	CCTAGCTCCCCATACCTGTG
CFBD049	CT	CCAAGTTATGTAGTCAATGGG	GATCGATCTTGATCTCTCTC
CFBD193	TC	ATTGATCAACTATTGATTGGTAA	GAGATGTCAGTCTCACAT	√
CFBD204	GT	TACACGTAGTTAAAATGTGTAA	CCTATTGTTAAATTGTAAACAA
CFCD103	TG	TACACTACCCCCTCCCGTTT	ATACCCATAGGTACTGGACA
CFCD131	GT	AAAAAACACTTTATCCTAGTGGGTGG	AAAGAACAGGACCTGTACGT
CFCD140	GT	TGTGTACAAACTGTGCTCGG	ATAGATACCCAACGCTTAGTG
CFCD182	TG	GTTCACATTGTCTCCCCTAA	AAGGGGGGCTCACATTGG
CFDD050	TC	TTAACTGCAATGTATTATAAAAG	TGTTTTGTTTGACTTGGTGGA
CFDD078	TC	GGTTGTATTTCTTCTTTGTTCA	CCGCGGACTGTCCATTATGA	√
CFDD098	CT	TTGTGTTGTTTCGTTTTTGTTG	TAGTTTAGGAACTAACGAATGT	√
CFFD001	CT	TTCGGTACAGGTGTGTATAA	CCTGCGATCTGTTTTATTAC
CFFD161	AG	CACAATCATATGAATAGCAAGAA	TTTACATAATGTGAACTGTAACT
CFFD163	TC	GTATTCGTTAATGTTCGATGA	ATATGCGTACTGCTAGTCAAT
CFZB10	GA	GTGACGTTATTTTTATGATATGAC	TTTCAACCATGTAGTAATCTTTA
CFKD025	AG	CTGAATAGCCAAATTCAGAGAAAA	TATCGACACCTGTCATTAGA
CFKD087	AG	ATAGCTCCAAAGTATTGGAC	TTTATTCAAATGGCAGACGAAG
CFLD006	CT	GCTTCATTTTAATCTGTAATTTTCA	CGTGCAAGGAAATACATTTTTG
CFLD035	AG	ACACGTACTAGTGAATAATAA	CCCGTCCAACAACAAATATG
CFLD109	CT	CCTTATCTAAAGCTATTACC	ATGATTCCCTTTACCATAGC
CFMD013	AG	GTTGCATTTTTGTATTGTGTTT	TGACGTGTTGACAATAAAGA
CFCD126	CA	ATACATGTCCCCTGCCGGTC	CACCTCCCAAAACTGAATATGC
CFJD002	CT	AATGAAAAGTGTAAAGTAATTCCT	GGGATTTATTCAAGATGATGTC	√
CFFD172	AG	GTGCCAATAAGTTATTGATAACAC	AGATTACTTTACACTTTTCATTGA
CFXY007	CT	CTGAGGATACGGGAGCAGTAGA	TACCAGTTATGCCCAGACGCCG	√
CFE24	TA	GGATTCAAAATAGACAGGATAG	TGGTAGTGTAAGTGGTGTGAAG	√
CFAD004	GA	CATTCATGCACACGACACACAC	GATTAGAATCTGCCTGAATTAAT
CFIT07070	AT	CCACACATATAAGTAAGGTGAA	GGTCATCAATATAATCCAAGTT	√
CFZB63	AG	CTTAGTGGCCATGCTTCTCA	GTGGGGGGTTAGTGGTTGGT
CFIT07492	GT	ATGTGACCTGCACGGAATATCC	TATCCGTGGGCCATACAGGGTA	√
CFIT08826	TC	GATGTAGACACTGCACCAGAAG	TAGATGTAGTTGTAGTGTACTG	√
