# Supplementary material for: HD-Marker: a highly multiplexed and flexible approach for targeted genotyping of more than 10,000 genes in a single-tube assay
Source: HighWire-hosted journal article supplement (doi:10.1101/gr.235820.118), 2018-11-08
Supplement: Supplemental_Table_S13.xlsx [file Supplemental_Table_S13.xlsx]

## Sheet: Sheet1
Table S13. Summary of probe information for indels.
Indel ID	motif	5' locus-specific-seq	3' locus-specific-seq
C9022S222	G/-	TTCTGTCCTGTGACGAGGTGTA	AGGTCTGTTCCACCCCACTT
C11083S585	A/-	TGACAATGTTGGTCATCATTTC	ATTGATGACAGCATCATTATATTT
C13178S301	G/-	AAGAAGCTGCAGATCATGTGCC	GTTTCTTTTCAATAAGCTGTCG
C144S359	T/-	CAAAGGTGGTCTCTAAATAGAG	ACTCTGCCACACCCTCTCTCA
C1295S345	A/-	CACAGGTGAAAGAGATGGTTGG	CTTGATGGTGCCGATGTATTGT
C10354S232	T/-	ATGCGAGGCACTTCAGTGTGAT	TCTCATCCGTCCGTCGTTTATA
C13520S329	A/-	CAGATACAAGCTTCACCCCTAC	TTGTGGAAAGTCACTCAGCTTT
C393S1247	G/-	GCTATCCACAGAAGCTGCGTGA	AGGTTGCGACCTTGCCCTTCT
C6105S483	C/-	CAGACAGGTGTATATATACAAAAT	GAATAGTTCTCACAATGGTATGA
C13675S443	C/-	CACAATCTACTGTAACCTCAGA	AAGGATAGTGACTGTGTAGGAG
C6308S370	C/-	AGGTTAGATTCATTAGCAAAGC	CCTCCCTCGACCTTTCTAGGT
C13724S283	G/-	GTTTCTTGGTCCTTCATCTGTC	CAGCCAGAGCAGTACCAATAAC
C34942S212	G/-	CGTAATAGAATCAATGTAAACGT	TAACCCAATGATATGGTCGTGT
C26493S220	T/-	TGGACATGCTGCACGAGACACT	CAAATAAGGACAAGACAAGGATT
C23862S505	A/-	CATCCAAGTCATTTCTAATGCTT	GACAAACGAGTCTTAGTCCCC
