# Supplementary material for: HD-Marker: a highly multiplexed and flexible approach for targeted genotyping of more than 10,000 genes in a single-tube assay
Source: HighWire-hosted journal article supplement (doi:10.1101/gr.235820.118), 2018-11-08
Supplement: Supplemental_Table_S17.xlsx [file Supplemental_Table_S17.xlsx]

## Sheet: Sheet1
Table S17. The cost comparison of HD-Marker and WGS for different scales of sample/locus number, sequencing coverage, and genome size.
	HD-Marker
No. of samples	Genome Size	No. of targeted loci
		50-plex			296-plex			795-plex			1293-plex			12472-plex
		per sample($)			per sample($)			per sample($)			per sample($)			per sample($)
		Library Prep	Sequencing	Total	Library Prep	Sequencing	Total	Library Prep	Sequencing	Total	Library Prep	Sequencing	Total	Library Prep	Sequencing	Total
100	100M	15.24	0.12	15.36	40.29	0.49	40.78	93.75	1.22	94.97	147.11	3.65	150.76	32.24	12.18	44.42
	500M
	1G
	3G
	10G
1000	100M	9.24	0.12	9.36	11.74	0.49	12.23	17.09	1.22	18.31	22.43	3.65	26.08	14.24	12.18	26.42
	500M
	1G
	3G
	10G
10000	100M	8.64	0.12	8.76	8.89	0.49	9.38	9.42	1.22	10.64	9.96	3.65	13.61	12.44	12.18	24.62
	500M
	1G
	3G
	10G
Whole genome sequencing (WGS)
No. of samples	Genome Size	Sequencing coverage
		4× depth				8× depth				16× depth				32× depth
		per sample($)				per sample($)				per sample($)				per sample($)
		Library Prep	Sequencing	Total		Library Prep	Sequencing	Total		Library Prep	Sequencing	Total		Library Prep	Sequencing	Total
100/1000/10000	100M	27.6	5.86667	33.4667		27.6	11.7333	39.3333		27.6	23.4667	51.0667		27.6	46.9333	74.5333
	500M		29.3333	56.9333			58.6667	86.2667			117.333	144.933			234.667	262.267
	1G		58.6667	86.2667			117.333	144.933			234.667	262.267			469.333	496.933
	3G		176	203.6			352	379.6			704	731.6			1408	1435.6
	10G		586.67	614.27			1173.33	1200.93			2346.67	2374.27			4693.33	4720.93
Note, for WGS, the sequencing cost was estimated for the adoption of NovaSeq 6000 S4 platform (~$44,000 for 3000 Gb) and the cost of library preparation for the adoption of Illumina TruSeq DNA Nano kit ($2650 for 96 samples; https://www.illumina.com/products/by-type/sequencing-kits/library-prep-kits/truseq-nano-dna.html)
