# Supplementary material for: HD-Marker: a highly multiplexed and flexible approach for targeted genotyping of more than 10,000 genes in a single-tube assay
Source: HighWire-hosted journal article supplement (doi:10.1101/gr.235820.118), 2018-11-08
Supplement: Supplemental_Table_S19.xlsx [file Supplemental_Table_S19.xlsx]

## Sheet: Sheet1
Table S19. PCR primer sequences used for Sanger-based genotype validation.
SNP ID	Forward Primer (5'-3')	Reverse Primer (5'-3')
C17024S1107	TGGAGATCCAATTTGACTAGCTG	TGTAAACCTCCGCATCTGTG
C13188S334	TCAAACACTACAGATGCTACCAATA	GATATGCTCCCGCTGGTAAC
C1929S459	CGAACTGTCCATCTTGTGCT	CATGTTTCCCAGCAGTTGGT
C13302S358	CAAAGTCATTTGCTCTACCTCCA	GCTGGTAGAAATAATGAAAGGACTAGA
C3766S642	TTTAGTTGAAACTTCGGTAGCTATG	TGCCAATGATTATTTCACTTGAT
C10312S365	GGTGGAGGCAATGAGGACTA	GGATTCCACGGTCCCTGTAT
C13467S212	GAGTCCATTGAGGGTGCAAT	TGTAAGCTGGTTGAGACACTGC
C7600S484	AGTGGCGGTGAAAACACATT	CGTCGACTGTCACTTCAGGA
C11582S1005	TGTCACCAGAGCGACTAAGG	CGGAAGAGCAGCAGTCTACA
C4194S399	TTCCCATTTGTTCCCAAGAG	CAACTGACCAATCAAAACAGTTG
C7939S513	AGTAAGGTGGGCTCAACACC	CGATCATCAGCGACGTACAC
C13713S493	TGAAGCACAAGCTGATGGTC	CCAAATCTTCCTCAGGCATT
C961S473	TGTCACAGCCGATTATCCAA	ACCAATGGTCCAGGTGAAGT
C6362S224	TACCCGTTGATCACGGACAT	TCTTGTTTCCACCACAACCA
C2387S132	CCCATATTACCTGGGTATTCG	AACCATTCAGTGTTCCTGTGA
C1047S198	TGAATGGCCCTGTACCAGAT	TGGACGGTGAAAGAACTGTG
C13112S622	TGTTCTCAATGGCAGTTTTCC	CCCCAAAATTGACAAGCAAG
C11038S101	ACTACTTAGTTCCTGTGACTAGAAAGG	GGCAATTCCTGCAGAGTCAT
C11060S566	GCCAGCGAGTTCTCGTAGTAA	AAAACACATGACCCCTCAGA
C13165S282	GGAAATAAATACAAACCTTGTGAGG	GGCATAGAATCTTCATCTCATTTC
C486S440	GCCAGCAAGAGAAGATCCAG	TTTGTCAGCGATGGCACTAC
C1457S313	GCAGATCTCGGCATAGTTGTT	CCGTTCGTGACGTTATACCA
C3479S265	ACATTTGCAAACGGCAAGAG	CCCATTTGGTCTCCTAGACG
C13278S254	GGTCAGCAGAGGATGGTTTC	GAGTTTGACGGAGAGAAAAACAA
C13302S515	CAAGTTGCCGTAGTGTGGAG	TGTGCGTGTGACGTTTAACA
C3746S232	TTGAGGAGCCTTGGTCAAAC	GCCACTCTACAAAGGGAGCA
C5657S410	CAACTAGTGGCGAAACGTCA	GCATTATGTCCAAATGCTAAGG
C5660S386	TGTCTATGAGTTTGCCTGATGC	TGTCACCATGCTGGACAGTAG
C1137S524	GCGAAGTCGAGAGATGGAAG	TCCAAAATCAGTTTCCTGTGC
C7440S234	GTCAGAGAGTGCGTCGTCA	GAGTGAGGAGGGAAATGGTG
C1253S507	GCAGAGCAACGTCAAGAACAG	CTGACGCGTGTCGTGAAG
C5801S149	TCTGACGCTTACCAGAGTGG	GCAGACAAGTGCTTTGGAGA
C13494S122	ATGATCTCTGACGCCTCCTG	ACAGGTGTGTGCAGCCTGTC
C10357S356	GGTCTATGGGTGGACTTGGA	ATGGACTTTGTGCTGGGAAG
C220S228	GTCAAGGTGAAGTTGTCTGATCT	TGAGCATGTCAGTATCCTTGTTG
C2240S364	TCCCTAAAAACGCTTGAGGA	GGTTGACTTTGTCATCCATTTC
C3920S131	ATTTGTTCGGGAGGAGTGTG	ATCAGCCGTTGCTGATGTC
C10344S218	GTCAGGAAAGCAAGCCTTTT	CTGCTCGTTGAGTTGATGGA
C3780S393	GGAAAACAGCTTTCTCAGAGG	CAGCTCCATCAACTGGACAA
C5901S92	GGCGGAGAGTACTGTTCCAT	AACAGCTGGCATCTCGATTT
C5925S212	GAAAGTAGAAGATCAACCCAAAGTC	CATTAATTGGCCAAGGTTCC
C10426S322	GATGAGCGATGTGCTTGGTA	GAACTGCTGCTTCAGGGAAC
C486S1490	TCCAGCAGCTCCAGGAAA	AACTGCTGGAAGGCGTAAGA
C7747S440	TCATCACTAGGGGCTACAGGA	TGAGGACACACTAACGCCTTC
C17981S341	ATCAGCAGGAATCGGACAAG	ATTGGGTAGCGCAGAATCAC
C17983S114	GCTGATAAACATGGGAATGGA	TTCACGACTGTGTTGGCATT
C11658S157	GCAGAAGGCAGACCTCACTC	ACCAGGCTTGTTTTGACCTC
C10539S493	CACCTACCGGAAGGAGAATC	CGTCCTCAGGGATGTTATGG
C10540S815	TGGATCACCATCAGGCAATA	CGTGGTGTACTTGTGGTAGCAT
C2424S82	AGGTCTTCGATATGTTGGTCCT	GCCACTGTCTGAGATGACGA
C6392S488	GTCTGGGGATCGTGATGTAA	CAGTCCACAAACCCGGTAAT
C13830S516	CGACGCAGCAGTTGTCATTA	GCTTGGCGATACGTTTGTCT
C10701S540	TGGATGGATTTGACGCATTA	AGCGTCCTGGTCGTAACAAG
C10738S434	ATGAAGCCACTCCCTGAAAG	GCGCTGTCGGACCTAAGTAA
C11956S448	AGAAACAGAAGAGGGGTGGAG	GCTGCTTTAACTGGTGTGACC
C18439S528	GGTCAGAGACCGCCATTG	GTGGGAAGGTAGCAGCAGAG
C15211S828	AGGAAAGCTGTGGTAGCTAGTG	GCAGTCTGAGTTTATTCATTTAACAG
C13899S685	AAGCAATGCGATTGATGGAC	AGTGATGAGGTTAGCCTTGAGC
C18454S221	TGAATTGGTGATATGTTTTAGGAGA	CCATCCACAACCTCACGAA
C6580S84	ACGTACGGAAGCAGGCTCTA	TAATCCAGTAGGCGAGATGG
C12073S228	TTTGTTAAACCCCAGCCTTG	GCACTGTAGCTTGTGCCACT
C15281S658	CTCCTGACACTCATGGATGG	TCGACCAAATCTTCTCAAAGC
C2428S282	GACCTGATCGGTCAGTTGAAA	CTTCTTCAGACATCTTTAGCATGAG
C13969S310	GCCAGAATTACGTCAGCTTG	CAAGAAGTTGCCTTTCATGTTG
C10896S356	GAAGCAGGAGCAGAGAAAGAG	TGCCATCTTTGCTGTCTTTG
C9268S300	CGAGTTTGTGCTGCTGGTTA	TTATTCCGTGCCATGAATCC
C13040S855	GAGAAATGGGCCAAGCTAAA	GTTCGGATGTCGGAAGATGT
C9306S495	GCCCTTGGTAGTCTGTGGAA	CTTCCCCAAACAACTCCGTA
C14105S207	TCATTGGACAGCTGAGAGGA	TGCCACGCTTCATTATTGATT
C6826S55	CGGCCATGTTGAATTGCT	CCTAAATCACACTTCTAAACGGCTA
C6837S172	CCGCCTTAGTTTCGTACTCG	GGTACCACGGCTTCACTTACA
C9396S218	TTTGTGAATTGGTGGGAAAA	CACATATACATTTCCATGTGTCCA
C2638S291	GCTGACAATGATGTTTGCCTA	GTGGACTCTGCCATTTGGTT
C14186S237	TGTATGTGTCAGGACTGCCTCT	GGTTGACAGGGTCTGCCATA
C22002S509	AGGATGGAGTGACCAGCAGT	AAATGGCCGATATTGAGTGC
C22144S315	CGTGAGATGCCACGATACAG	TAGAGATCGCGTTGATTCGT
C18912S482	GCTTTCTGTGTGGGATTGG	TGACCTTTCTTCTCCAAGACG
C30321S1078	AACACATGGGAGTGATGCAA	TGCCTGCCATAGTCATCTGT
C25947S104	TGTCTGCTTCTTCCTGATGG	CACTTCTTAACTCGAGCTTTCCA
C19356S135	TTGGAAAGCCATGGAAGTCT	GCTCAGTTGAGGTTTAGCTTCG
C19563S124	TACGGCGAGTGTAAGCAGAA	TGGCTTTGTACATCCGACCT
C22556S478	GCCGAATGTTCCATAAATCG	CACAGAACCTGAGAGAGCA
C41766S1425	TATGCTACCTCCTCCCTTGC	CCCTTCCGCTCCTAAGTACA
C36302S262	GGATTTCCCTCATGGACTTTG	CCATGGTAACCTCTATTCAACACA
C22571S304	CCCGGTAGGACTTCACAAGA	GCCTTGGCCTTGACTAAGTG
C42372S207	GTTCAATCGGTTCGTGCAT	TCCAGAGTCACATGTTACAGCA
C19761S225	CCAAAGAGGAGGCAAATATCG	GGACATGGAGTTTGTTATCTTTGAC
C42648S332	GGCCACCAGACTATTTGGAA	CTCCGACGTCAGGCTCAG
C23547S330	CAGGGTGTACTGTGAGAACCA	CACGTTGACCTAGGCGTCTT
C26740S331	TGAAGAAGGGGAATGAGTACG	CATGTTGGAATCTCCAGTGC
C30882S360	TTTGACTTCATCTGAAAGTGTGC	CTTTCTCATCCTCCTCTGCTG
C35645S180	ACAAGGTTCCCCTGAAGCAT	TTTGTGAGACGGGGAAAGTC
C26800S309	GCGTTACGAACTTGGAGCTT	ACATTTCCATCCGGGCTATT
C22907S250	TGACTTAGATGAGACGGTGGAA	TCTAAAGGCGTGTCCTGGTC
C45788S313	CGGTTAAAATCATCAGAAACCTT	TTCCGTTTCATAAACGTATCCT
C31603S213	AGCGACGAGTTTGTGAGACC	AAAACCTGAAGAAGAGGTGTCC
C35724S312	TCCTCGCGCTGTTTGTAGTA	CCATGGTGAGCATTCCTGAT
C27247S161	TCCTCCTGGAATGAGAAAGG	GGATAGCACAGAGGGCCATA
C20212S346	CACGGAGAAGTCACTGCAAA	TCTACCTGCTCCAGCTCCAT
C43228S357	CACCTACCCAACACATGCAC	GGTGTGGGAACCACAATAGG
C29921S502	CGTCCTGATTGAACACAACA	CTTCGAGGTACACCAGGTCA
C35935S733	GCCAGATGTGACAAATTCCA	GCCAACACAATGTCCTGCT
C35958S657	CATGTCGTAGTTGATGACATGTTG	GCTCAATTGACCAGTTCAAACA
C43423S551	CTCTGGAGGCTGCTGAAAAC	AGCGAACTGTAAGACTGCATTG
C31272S265	CTGCATTTCTTTTCGTGCTG	CGGTTCATTCAGAACCAGGTA
C23302S420	GAGTCCAGTTCCACCTCAAGA	GACGTTGTCCAACACGTTCA
C31502S237	GGCGTTACGATTGTTACTTGTG	AAACGGTCCTTCTCACAACA
C23517S1064	ATCCCAGCTTATGACCGACA	TCCTGGAACCTGGAACATTG
C31293S380	TTTGTGGAGAGCAGACTAATGTATTT	AGTGTTTCTCCAAAGTGTTGTTT
C31500S425	TGAGACAGAAATTGAAAGAGACTGA	GGCATTTTCTCGGGCTAAGT
C43542S487	TACCTTGCGCGGTATGTGTA	CCAGATAGTTCTCCAGGGTTGA
C11128S233	CGCAAACTTATTGTGCGATG	TGGAAGGTAACCCGTACTCG
C38S585	TGCAGAGAGGCAATATGTCG	CAGGTTTGGGTACCAGGTAAG
C7680S384	CCAGTTGTTAGTGTCTTCACCTG	CGGAGGGAGAAGAAATACGC
C10530S376	GCTGCTGATGCTGTACGAAA	CAGGTTGTTGGTGCATCG
C10550S186	GCTGGAGGCATTAAACAAAA	AGTAGACGTTGCCAGTTCGT
C15084S415	GAAGCAGACTCTCTTGAGTTGG	TTCAGGACGCTTTGTCTGTC
C6364S1473	GGGAATATTGTCTACCCAGTAAGAA	ATTTTCAGCCCGGAAGTGAC
C6408S259	TCTCAGCATGGATGTTCTTTG	TGTCTGTCCTGTCAGGCGTA
C10624S289	TCAATGATGGGAATGTGTGG	ACGTGGAAGACAAAGTGTCC
C15117S745	TCAGCAGCATCTGAAACTTTG	CCTGTGACCTGGCTTTTGAT
C15142S209	GTGGCAGTGGTGCTTACAAC	TGTCCGATGAATCATTCCAG
C10785S289	TTCTTAGAAGTTACCATCAGAGGTG	TTTTTATCTTTGGTTAATGACTCTGC
C2312S296	TGTGTAACTGCAAAGCACCA	CAGGCCTGCTCTGATCTGTA
C12341S258	TTGACGTGTAAATCGGAAGG	GCCATGGTTCTTGGATCAGT
C15529S654	GCATGGCCCTGTATTTCCTA	CCAGACCAGCAGTTAAGTACCA
C14181S1154	GCGGATGTACAGTGTCTGTTTT	TGCCTGTCCATGTGTGCT
C2575S367	GGAGACTTCAGCGAGAAGGA	TAGGCAACACCTCGAACTGA
C14171S289	CGTGTATCCCGTGTAAGGTG	TCTGTCCAATACAAACAAAGTAATGA
C204S559	ACGGTTCCACATGGCTTATT	GACCCCCACCACTTCTGG
C712S134	CTGCTGTGCGATATTCAGTTG	TGGCTTTTAGTTTCATACAACACG
C1348S309	CGACACCACTGCCATTTAGA	GTGGTGAGCAACAGCAGGTA
C1357S373	TCCTCTAACAAGCTGTTCTGGAT	AAACCGAAGATTGCAAAACG
C1521S457	TTGGCCATGCTACTGTGTTG	CGTCGGTAACGCTTGTATCC
C1611S154	TTTACATTTCACGCATCAGTCC	TACTTGGTGCGATTGGTTGA
C1678S167	ATTGGACAGTTCAGGGAGGA	AACAGTATGCCCTGGGACAA
C1714S421	AATCGACTGTAGCTCCTGGAT	CCATGGATTGGTTGGAGAAA
C1840S175	TTCTGTTTCGCGTCTTTGTG	CCTGCCAGTCATAGCGATAAA
C3177S1038	TGCACTGACGGAACTCCAG	TCTGATTCCTCTGTTTTGGTGA
C3190S318	GAGGAATGCAGGCGAATTAC	CAGCCCAGCTTTGTACTCG
C3821S314	GCAAGGTTTCATTAAGGTCACG	TGCTGCTTAGAAAATATCACTAGCC
C3827S376	TCTGCACTCATTAACCTCAGAA	CAAGAGTTACAACCTAATCTGCCTA
C4035S146	CGACACAGATACGGGAATAGAA	TGTACTGCAACTACAACTTCCAGA
C4176S381	TGGCTTGTAAAGACAAAGCTGA	GCCATTTGATGTTCTCAACG
C6278S56	CAGGTTTGTGTTGTTTATTCACAT	GAAGAGCTTAAAGTTATTTGTTGCAT
C6281S503	TGCTATTCGCTAGATATCTGTACCTG	GGATAAATCACCTGGAAATGAC
C7475S253	CCCCTTCAACATGAACGACT	CCTTTCATACATGGTGTTTCTG
C7520S195	TGGAGATGAGGGATGTCTTCA	ACGTCCAAGCAATGGTATCC
C7692S619	AGGGAAAAAGCGAGGGACAG	TTCGTACGCTACTGGAGCAA
C7922S309	CCAGCCACCATGTGATAGAA	TAGCAATCTGTCAGCGGAAC
C9022S197	GGGATACAGTGTTGTTCCAGTG	CTGTCCTGTGACGAGGTGTA
C10233S246	AACTCACTATGCCTTGGATAAGC	GAGGCACTTTTAACAGAACTGG
C10478S665	GTTCATCTTCACGATTTCATTTG	TTATCCCTCGCTTTCGTCAA
C10512S296	AACATTGACACCCGTCAAAA	TCCTCATCATACATGTCAATGC
C10571S260	ATCGCAGCCCTTTTCTCTCT	TCGCTTGGCTGTTGACTATG
C10580S104	TTCACTGGACTTGTGTGTTGG	GGTTTTGTAGGTCCACTTTAGCA
C11090S978	CCAGTTCAGCTGTCTCAGTCC	GATCCCTAAAAGACAACGAACA
C11315S248	AACTGCGCGAATACGAAGAT	CCAGAGCGGAGTACTTGTCC
C11507S384	AGCCCAAAGAGACAGCTGAG	AGGACTTTGCTGGCAACACTA
C11680S134	CCTCAGGTTTGACACATTGG	GGGAAGGCTACATGTGACG
C11741S204	CCAAGTCCAGCAAGTCTGGT	TCCTGGGTTTTAGGGTTAATGA
C13164S89	ACCAATATTCTATTGTGCTTATCTAGG	TGTAACTAGGATTTAGGTGGTGCT
C13251S271	ATGAGCTCCATCAAATGCAA	TGCATTTCTGTATCGGACAAG
C13429S174	GGATGGTATGAAATCACTATACGG	TGAGTCGGTACGGATTCTTCTT
C13455S296	TTGCTGACTACGTCAGAGAACAC	CGATGGAATTCCCAAATGTT
C13514S91	CACCTGGTCTATTATCACAGATACAAA	CAGAGTATACACACAAACCCTTGG
C13588S562	GCAGACGACCCTTTCGTACT	ACTGCCAGGAATTGTTTTGG
C13754S1077	TTCTTCATCGTCCCATTCATC	TCTGAAGGGACTATTTCAATTTCTG
C15064S449	CCAGCTATGAAAATTCCGTCA	TGTCTGTGCAGCAATGTCAG
C17096S325	CCAGAGCAAGATCTCGAAGC	GGAATTGGTACCATCACAATC
C17188S727	ATATCCACCCCACACTCGAC	CCGTGTCATCGTGACTCATT
C17805S269	TTCATTGCTAGACTTAATCCAAAGA	CCGTGAAAATCCAGTTACCAA
C17950S507	TTGGAATGATTGGTTTTGTATCTG	TCAATTTCATGAGAAGTCGGTTC
